# Supplementary material for: A Novel Biomarker Based on miRNA to Predict the Prognosis of Muscle-Invasive Bladder Urothelial Carcinoma
Source: J Oncol. 2019 Dec 6;2019:2654296. doi: 10.1155/2019/2654296 (PMC6925814; doi:10.1155/2019/2654296)
Supplement: Supplementary Materials — Table S1: targeted mRNA of DEmiRNAs—targeted mRNAs of DEmiRNAs from miRDB, miRTarBase, and TargetScan. Table S2: miRDB GO function—Gene Ontology enriched analysis of target mRNA of DEmiRNA. The target mRNA obtained from miRDB database. Table S3: miRTarBase GO function—Gene Ontology enriched analysis of target mRNA of DEmiRNA. The target mRNA obtained from miRTarBase database. Table S4: TargetScan GO function—Gene Ontology enriched analysis of target mRNA of DEmiRNA. The target mRNA obtained from TargetScan database. Table S5: common GO terms—intersection of GO analysis results of three databases. Table S6: miRDB KEGG pathways—KEGG pathway enriched analysis of target mRNA of DEmiRNA. The target mRNA obtained from miRDB database. Table S7: miRTarBase KEGG pathways—KEGG pathway enriched analysis of target mRNA of DEmiRNA. The target mRNA obtained from miRTarBase database. Table S8: TargetScan KEGG pathways—KEGG pathway enriched analysis of target mRNA of DEmiRNA. The target mRNA obtained from TargetScan database. Table S9: common KEGG pathways—intersection of KEGG pathway analysis results of three databases. [file 2654296.f1.xlsx]

## Sheet: Legend
Supplementary file
Table	Name	Description
Table S1.	Targeted mRNA of DEmiRNAs	Targeted mRNAs of DEmiRNAs from miRDB, miRTarBase and TargetScan
Table S2.	miRDB GO function	Gene Ontology enriched analysis of target mRNA of DEmiRNA. The target mRNA obtained from miRDB database.
Table S3.	miRTarBase GO function	Gene Ontology enriched analysis of target mRNA of DEmiRNA. The target mRNA obtained from miRTarBase database.
Table S4.	TargetScan GO function	Gene Ontology enriched analysis of target mRNA of DEmiRNA. The target mRNA obtained from TargetScan database.
Table S5.	Common GO terms	Intersection of GO analysis results of three databases.
Table S6.	miRDB KEGG pathways	KEGG pathway enriched analysis of target mRNA of DEmiRNA. The target mRNA obtained from miRDB database.
Table S7.	miRTarBase KEGG pathways	KEGG pathway enriched analysis of target mRNA of DEmiRNA. The target mRNA obtained from miRTarBase database.
Table S8.	TargetScan KEGG pathways	KEGG pathway enriched analysis of target mRNA of DEmiRNA. The target mRNA obtained from TargetScan database.
Table S9.	Common KEGG pathways	Intersection of KEGG pathway analysis results of three databases.

## Sheet: S1.Targeted mRNA  of DEmiRNAs
miRNA	miRBase ID	Gene Symbol of Targeted mRNA	ENTREZID of Targeted mRNA	Database
hsa-miR-145	MI0000461	BNIP3	664	miRTarBase
hsa-miR-145	MI0000461	KLF5	688	miRTarBase
hsa-miR-145	MI0000461	SOX2	6657	miRTarBase
hsa-miR-145	MI0000461	KLF4	9314	miRTarBase
hsa-miR-100	MI0000102	PLK1	5347	miRTarBase
hsa-let-7c	MI0000064	CDC25A	993	miRTarBase
hsa-miR-145	MI0000461	MUC1	4582	miRTarBase
hsa-miR-145	MI0000461	MYO6	4646	miRTarBase
hsa-miR-519c	MI0003148	HIF1A	3091	miRTarBase
hsa-miR-145	MI0000461	CDKN1A	1026	miRTarBase
hsa-miR-145	MI0000461	STAT1	6772	miRTarBase
hsa-miR-145	MI0000461	YES1	7525	miRTarBase
hsa-miR-145	MI0000461	CBFB	865	miRTarBase
hsa-miR-145	MI0000461	PPP3CA	5530	miRTarBase
hsa-miR-145	MI0000461	CLINT1	9685	miRTarBase
hsa-let-7c	MI0000064	TGFBR1	7046	miRTarBase
hsa-miR-145	MI0000461	IRS1	3667	miRTarBase
hsa-miR-145	MI0000461	PARP8	79668	miRTarBase
hsa-miR-519c	MI0003148	ABCG2	9429	miRTarBase
hsa-miR-145	MI0000461	TMOD3	29766	miRTarBase
hsa-miR-145	MI0000461	HOXA9	3205	miRTarBase
hsa-let-7c	MI0000064	TRIM71	131405	miRTarBase
hsa-let-7c	MI0000064	HMGA2	8091	miRTarBase
hsa-miR-145	MI0000461	EGFR	1956	miRTarBase
hsa-miR-100	MI0000102	EGR2	1959	miRTarBase
hsa-miR-100	MI0000102	ID1	3397	miRTarBase
hsa-miR-100	MI0000102	FGFR3	2261	miRTarBase
hsa-miR-100	MI0000102	MMP13	4322	miRTarBase
hsa-miR-145	MI0000461	MAP3K3	4215	miRTarBase
hsa-miR-145	MI0000461	FSCN1	6624	miRTarBase
hsa-miR-33b	MI0003646	ABCA1	19	miRTarBase
hsa-miR-519c	MI0003148	ELAVL1	1994	miRTarBase
hsa-let-7c	MI0000064	MYC	4609	miRTarBase
hsa-miR-33b	MI0003646	BCL2	596	miRTarBase
hsa-miR-145	MI0000461	MYC	4609	miRTarBase
hsa-let-7c	MI0000064	DICER1	23405	miRTarBase
hsa-let-7c	MI0000064	BCL2L1	598	miRTarBase
hsa-miR-145	MI0000461	FLI1	2313	miRTarBase
hsa-let-7c	MI0000064	NRAS	4893	miRTarBase
hsa-miR-145	MI0000461	DFFA	1676	miRTarBase
hsa-miR-145	MI0000461	IFNB1	3456	miRTarBase
hsa-miR-145	MI0000461	TIRAP	114609	miRTarBase
hsa-miR-145	MI0000461	POU5F1	5460	miRTarBase
hsa-miR-145	MI0000461	IGF1R	3480	miRTarBase
hsa-miR-145	MI0000461	KRT7	3855	miRTarBase
hsa-miR-145	MI0000461	PPM1D	8493	miRTarBase
hsa-miR-145	MI0000461	MYRF	745	miRTarBase
hsa-miR-145	MI0000461	CPEB4	80315	miRTarBase
hsa-miR-145	MI0000461	FZD7	8324	miRTarBase
hsa-miR-145	MI0000461	ROBO2	6092	miRTarBase
hsa-miR-145	MI0000461	SRGAP1	57522	miRTarBase
hsa-miR-145	MI0000461	EIF4E	1977	miRTarBase
hsa-miR-145	MI0000461	CDK4	1019	miRTarBase
hsa-miR-100	MI0000102	ATM	472	miRTarBase
hsa-miR-145	MI0000461	VEGFA	7422	miRTarBase
hsa-miR-145	MI0000461	SERPINE1	5054	miRTarBase
hsa-miR-145	MI0000461	IRS2	8660	miRTarBase
hsa-let-7c	MI0000064	MPL	4352	miRTarBase
hsa-miR-100	MI0000102	IGF1R	3480	miRTarBase
hsa-miR-145	MI0000461	ITGB8	3696	miRTarBase
hsa-miR-519c	MI0003148	TIMP2	7077	miRTarBase
hsa-miR-519c	MI0003148	PTEN	5728	miRTarBase
hsa-miR-519c	MI0003148	CDKN1A	1026	miRTarBase
hsa-miR-100	MI0000102	BMPR2	659	miRTarBase
hsa-miR-145	MI0000461	SWAP70	23075	miRTarBase
hsa-miR-100	MI0000102	CTDSPL	10217	miRTarBase
hsa-miR-145	MI0000461	ESR1	2099	miRTarBase
hsa-miR-145	MI0000461	NUDT1	4521	miRTarBase
hsa-miR-33b	MI0003646	MYC	4609	miRTarBase
hsa-miR-145	MI0000461	JAG1	182	miRTarBase
hsa-miR-100	MI0000102	FLT1	2321	miRTarBase
hsa-miR-145	MI0000461	NEDD9	4739	miRTarBase
hsa-miR-145	MI0000461	PAK4	10298	miRTarBase
hsa-miR-145	MI0000461	DDX17	10521	miRTarBase
hsa-miR-615	MI0003628	IGF2	3481	miRTarBase
hsa-miR-615	MI0003628	LCOR	84458	miRTarBase
hsa-miR-145	MI0000461	ERG	2078	miRTarBase
hsa-miR-145	MI0000461	NRAS	4893	miRTarBase
hsa-miR-145	MI0000461	ILK	3611	miRTarBase
hsa-miR-145	MI0000461	CTGF	1490	miRTarBase
hsa-miR-145	MI0000461	SOCS7	30837	miRTarBase
hsa-miR-145	MI0000461	SOCS7	122809	miRTarBase
hsa-miR-145	MI0000461	MDM2	4193	miRTarBase
hsa-miR-145	MI0000461	ADAM17	6868	miRTarBase
hsa-miR-145	MI0000461	CDH2	1000	miRTarBase
hsa-miR-145	MI0000461	HDAC2	3066	miRTarBase
hsa-miR-100	MI0000102	MTOR	2475	miRTarBase
hsa-miR-615	MI0003628	KIF14	9928	miRTarBase
hsa-miR-615	MI0003628	CDC37	11140	miRTarBase
hsa-miR-615	MI0003628	KLHL42	57542	miRTarBase
hsa-miR-615	MI0003628	PBX3	5090	miRTarBase
hsa-miR-615	MI0003628	TRIP10	9322	miRTarBase
hsa-miR-615	MI0003628	C19orf54	284325	miRTarBase
hsa-miR-615	MI0003628	UBR3	130507	miRTarBase
hsa-miR-615	MI0003628	BVES	11149	miRTarBase
hsa-miR-615	MI0003628	DIXDC1	85458	miRTarBase
hsa-miR-615	MI0003628	ENAH	55740	miRTarBase
hsa-miR-145	MI0000461	RTKN	6242	miRTarBase
hsa-miR-145	MI0000461	F11R	50848	miRTarBase
hsa-miR-145	MI0000461	ARL6IP5	10550	miRTarBase
hsa-miR-145	MI0000461	AKR1B10	57016	miRTarBase
hsa-miR-145	MI0000461	C11orf65	160140	miRTarBase
hsa-miR-145	MI0000461	HLTF	6596	miRTarBase
hsa-miR-145	MI0000461	GMFB	2764	miRTarBase
hsa-miR-145	MI0000461	SERINC5	256987	miRTarBase
hsa-miR-145	MI0000461	MEST	4232	miRTarBase
hsa-miR-145	MI0000461	ALPPL2	251	miRTarBase
hsa-miR-145	MI0000461	NDRG2	57447	miRTarBase
hsa-miR-145	MI0000461	DTD1	92675	miRTarBase
hsa-miR-145	MI0000461	TPM3	7170	miRTarBase
hsa-miR-145	MI0000461	MAP2K6	5608	miRTarBase
hsa-miR-145	MI0000461	CEP19	84984	miRTarBase
hsa-miR-145	MI0000461	TPRG1	285386	miRTarBase
hsa-miR-145	MI0000461	GOLM1	51280	miRTarBase
hsa-miR-145	MI0000461	CCDC43	124808	miRTarBase
hsa-miR-145	MI0000461	MMP1	4312	miRTarBase
hsa-miR-145	MI0000461	PTP4A2	8073	miRTarBase
hsa-miR-145	MI0000461	TMEM9B	56674	miRTarBase
hsa-miR-145	MI0000461	MMP12	4321	miRTarBase
hsa-miR-145	MI0000461	MTMR14	64419	miRTarBase
hsa-miR-145	MI0000461	ALDH3A1	218	miRTarBase
hsa-miR-145	MI0000461	NDUFA4	4697	miRTarBase
hsa-miR-145	MI0000461	FAM3C	10447	miRTarBase
hsa-miR-145	MI0000461	LYPLA2	11313	miRTarBase
hsa-miR-145	MI0000461	FAM45A	404636	miRTarBase
hsa-miR-145	MI0000461	PIGF	5281	miRTarBase
hsa-miR-145	MI0000461	AP1G1	164	miRTarBase
hsa-miR-145	MI0000461	JADE1	79960	miRTarBase
hsa-miR-145	MI0000461	NIPSNAP1	8508	miRTarBase
hsa-miR-145	MI0000461	KREMEN1	83999	miRTarBase
hsa-miR-145	MI0000461	MMP14	4323	miRTarBase
hsa-miR-145	MI0000461	ABRACL	58527	miRTarBase
hsa-miR-145	MI0000461	MIXL1	83881	miRTarBase
hsa-miR-145	MI0000461	TSPAN6	7105	miRTarBase
hsa-miR-145	MI0000461	PODXL	5420	miRTarBase
hsa-miR-145	MI0000461	APH1A	51107	miRTarBase
hsa-miR-145	MI0000461	ABHD17C	58489	miRTarBase
hsa-let-7c	MI0000064	COPS8	10920	miRTarBase
hsa-let-7c	MI0000064	GPS1	2873	miRTarBase
hsa-let-7c	MI0000064	COPS6	10980	miRTarBase
hsa-miR-145	MI0000461	NANOG	79923	miRTarBase
hsa-miR-145	MI0000461	MYO5A	4644	miRTarBase
hsa-miR-33b	MI0003646	BPTF	2186	miRTarBase
hsa-miR-33b	MI0003646	SRP14	6727	miRTarBase
hsa-miR-33b	MI0003646	ADCY9	115	miRTarBase
hsa-miR-33b	MI0003646	IMPDH2	3615	miRTarBase
hsa-miR-615	MI0003628	FBXO28	23219	miRTarBase
hsa-miR-615	MI0003628	CCDC127	133957	miRTarBase
hsa-miR-615	MI0003628	ZFYVE9	9372	miRTarBase
hsa-miR-615	MI0003628	TRAFD1	10906	miRTarBase
hsa-miR-615	MI0003628	HIST2H4B	554313	miRTarBase
hsa-miR-615	MI0003628	PRKCD	5580	miRTarBase
hsa-miR-615	MI0003628	CEP152	22995	miRTarBase
hsa-miR-615	MI0003628	TLE1	7088	miRTarBase
hsa-miR-615	MI0003628	DCAF12	25853	miRTarBase
hsa-miR-615	MI0003628	UBA52	7311	miRTarBase
hsa-miR-615	MI0003628	PRR12	57479	miRTarBase
hsa-miR-615	MI0003628	CHRNA5	1138	miRTarBase
hsa-miR-615	MI0003628	RPL9	6133	miRTarBase
hsa-miR-615	MI0003628	TRPC1	7220	miRTarBase
hsa-miR-615	MI0003628	TUFM	7284	miRTarBase
hsa-miR-615	MI0003628	GTF3C4	9329	miRTarBase
hsa-miR-615	MI0003628	ESPL1	9700	miRTarBase
hsa-miR-615	MI0003628	FKBP4	2288	miRTarBase
hsa-miR-615	MI0003628	GNL3	26354	miRTarBase
hsa-miR-615	MI0003628	ZNF235	9310	miRTarBase
hsa-miR-615	MI0003628	VIRMA	25962	miRTarBase
hsa-miR-615	MI0003628	HIST2H2AA3	8337	miRTarBase
hsa-miR-615	MI0003628	PABPC4	8761	miRTarBase
hsa-miR-615	MI0003628	RHBDF2	79651	miRTarBase
hsa-miR-615	MI0003628	CTSZ	1522	miRTarBase
hsa-miR-615	MI0003628	IMPDH2	3615	miRTarBase
hsa-miR-615	MI0003628	PTPRK	5796	miRTarBase
hsa-miR-615	MI0003628	IGF2BP1	10642	miRTarBase
hsa-miR-615	MI0003628	HNRNPL	3191	miRTarBase
hsa-miR-615	MI0003628	CNOT1	23019	miRTarBase
hsa-miR-615	MI0003628	FAM53B	9679	miRTarBase
hsa-miR-615	MI0003628	SLC1A4	6509	miRTarBase
hsa-miR-615	MI0003628	ELF4	2000	miRTarBase
hsa-miR-615	MI0003628	HIST1H2BJ	8970	miRTarBase
hsa-miR-615	MI0003628	CORO1A	11151	miRTarBase
hsa-miR-615	MI0003628	NR2C2	7182	miRTarBase
hsa-miR-615	MI0003628	GATAD2A	54815	miRTarBase
hsa-miR-615	MI0003628	PPP1R15B	84919	miRTarBase
hsa-miR-615	MI0003628	SSR3	6747	miRTarBase
hsa-miR-615	MI0003628	GRPEL2	134266	miRTarBase
hsa-miR-615	MI0003628	ATP2B1	490	miRTarBase
hsa-miR-615	MI0003628	BCOR	54880	miRTarBase
hsa-miR-615	MI0003628	CPSF4	10898	miRTarBase
hsa-miR-615	MI0003628	NPRL3	8131	miRTarBase
hsa-miR-615	MI0003628	SMARCA4	6597	miRTarBase
hsa-miR-615	MI0003628	VPS72	6944	miRTarBase
hsa-miR-615	MI0003628	PANK2	80025	miRTarBase
hsa-miR-615	MI0003628	KIF2A	3796	miRTarBase
hsa-miR-615	MI0003628	NOLC1	9221	miRTarBase
hsa-miR-615	MI0003628	NXF1	10482	miRTarBase
hsa-miR-615	MI0003628	NECTIN1	5818	miRTarBase
hsa-miR-615	MI0003628	YWHAZ	7534	miRTarBase
hsa-miR-615	MI0003628	PRPSAP1	5635	miRTarBase
hsa-miR-615	MI0003628	TCP1	6950	miRTarBase
hsa-miR-615	MI0003628	EEF2	1938	miRTarBase
hsa-miR-615	MI0003628	KHSRP	8570	miRTarBase
hsa-miR-615	MI0003628	WDR4	10785	miRTarBase
hsa-miR-615	MI0003628	TMPO	7112	miRTarBase
hsa-miR-615	MI0003628	PA2G4	5036	miRTarBase
hsa-miR-615	MI0003628	CHD7	55636	miRTarBase
hsa-miR-615	MI0003628	SIPA1L3	23094	miRTarBase
hsa-miR-615	MI0003628	CUEDC2	79004	miRTarBase
hsa-miR-615	MI0003628	CBX6	23466	miRTarBase
hsa-miR-615	MI0003628	HSPA8	3312	miRTarBase
hsa-miR-615	MI0003628	EIF3C	8663	miRTarBase
hsa-miR-615	MI0003628	PTMA	5757	miRTarBase
hsa-miR-615	MI0003628	MSH6	2956	miRTarBase
hsa-miR-615	MI0003628	PSMF1	9491	miRTarBase
hsa-miR-615	MI0003628	VDAC1	7416	miRTarBase
hsa-miR-615	MI0003628	CTNNA1	1495	miRTarBase
hsa-miR-615	MI0003628	YIPF6	286451	miRTarBase
hsa-miR-615	MI0003628	SLC30A1	7779	miRTarBase
hsa-miR-615	MI0003628	TMUB1	83590	miRTarBase
hsa-miR-615	MI0003628	SEC24C	9632	miRTarBase
hsa-miR-615	MI0003628	BRD2	6046	miRTarBase
hsa-miR-615	MI0003628	PTBP1	5725	miRTarBase
hsa-miR-615	MI0003628	KIAA1109	84162	miRTarBase
hsa-miR-615	MI0003628	RPL15	6138	miRTarBase
hsa-miR-615	MI0003628	GNAS	2778	miRTarBase
hsa-miR-615	MI0003628	CHD4	1108	miRTarBase
hsa-miR-615	MI0003628	EBNA1BP2	10969	miRTarBase
hsa-miR-615	MI0003628	AP3M1	26985	miRTarBase
hsa-miR-615	MI0003628	SYPL2	284612	miRTarBase
hsa-miR-615	MI0003628	XRCC6	2547	miRTarBase
hsa-miR-615	MI0003628	DAZAP1	26528	miRTarBase
hsa-miR-615	MI0003628	RPN2	6185	miRTarBase
hsa-miR-615	MI0003628	CDC7	8317	miRTarBase
hsa-miR-615	MI0003628	SVIL	6840	miRTarBase
hsa-miR-615	MI0003628	ENO1	2023	miRTarBase
hsa-miR-615	MI0003628	PPIL1	51645	miRTarBase
hsa-miR-615	MI0003628	ZBTB4	57659	miRTarBase
hsa-miR-615	MI0003628	ABT1	29777	miRTarBase
hsa-miR-615	MI0003628	PRR3	80742	miRTarBase
hsa-miR-615	MI0003628	EIF2B3	8891	miRTarBase
hsa-miR-615	MI0003628	TJP1	7082	miRTarBase
hsa-miR-615	MI0003628	RBM10	8241	miRTarBase
hsa-miR-615	MI0003628	MRFAP1	93621	miRTarBase
hsa-miR-615	MI0003628	DPH7	92715	miRTarBase
hsa-miR-615	MI0003628	TROAP	10024	miRTarBase
hsa-miR-615	MI0003628	HDAC1	3065	miRTarBase
hsa-miR-615	MI0003628	FOXO4	4303	miRTarBase
hsa-miR-615	MI0003628	HNRNPU	3192	miRTarBase
hsa-miR-615	MI0003628	MRPL21	219927	miRTarBase
hsa-miR-615	MI0003628	EP300	2033	miRTarBase
hsa-miR-615	MI0003628	RASAL3	64926	miRTarBase
hsa-miR-615	MI0003628	TPST2	8459	miRTarBase
hsa-miR-615	MI0003628	UBC	7316	miRTarBase
hsa-miR-615	MI0003628	CCND3	896	miRTarBase
hsa-miR-615	MI0003628	INTS1	26173	miRTarBase
hsa-miR-615	MI0003628	EXOC2	55770	miRTarBase
hsa-miR-615	MI0003628	SYPL1	6856	miRTarBase
hsa-miR-615	MI0003628	PAFAH1B2	5049	miRTarBase
hsa-miR-615	MI0003628	CHAMP1	283489	miRTarBase
hsa-miR-615	MI0003628	SERBP1	26135	miRTarBase
hsa-miR-615	MI0003628	RAPGEF1	2889	miRTarBase
hsa-miR-615	MI0003628	HELLS	3070	miRTarBase
hsa-miR-615	MI0003628	HSPA4	3308	miRTarBase
hsa-miR-615	MI0003628	FAM13A	10144	miRTarBase
hsa-miR-615	MI0003628	SALL2	6297	miRTarBase
hsa-miR-615	MI0003628	MORF4L1	10933	miRTarBase
hsa-miR-615	MI0003628	PCNA	5111	miRTarBase
hsa-miR-615	MI0003628	RNF25	64320	miRTarBase
hsa-miR-615	MI0003628	RPSA	3921	miRTarBase
hsa-miR-615	MI0003628	PHGDH	26227	miRTarBase
hsa-miR-615	MI0003628	SUPT20H	55578	miRTarBase
hsa-miR-615	MI0003628	GOSR1	9527	miRTarBase
hsa-miR-615	MI0003628	RPL37A	6168	miRTarBase
hsa-miR-615	MI0003628	RPS3	6188	miRTarBase
hsa-miR-615	MI0003628	ANP32A	8125	miRTarBase
hsa-miR-615	MI0003628	CNOT10	25904	miRTarBase
hsa-miR-615	MI0003628	BACH2	60468	miRTarBase
hsa-miR-615	MI0003628	MSTO1	55154	miRTarBase
hsa-miR-615	MI0003628	YBX1	4904	miRTarBase
hsa-miR-615	MI0003628	MAP1A	4130	miRTarBase
hsa-miR-615	MI0003628	SERINC3	10955	miRTarBase
hsa-miR-615	MI0003628	DIDO1	11083	miRTarBase
hsa-miR-615	MI0003628	PARP1	142	miRTarBase
hsa-miR-615	MI0003628	HGSNAT	138050	miRTarBase
hsa-miR-615	MI0003628	HNRNPAB	3182	miRTarBase
hsa-miR-615	MI0003628	RANBP10	57610	miRTarBase
hsa-miR-615	MI0003628	RPS15	6209	miRTarBase
hsa-miR-615	MI0003628	RPL23	9349	miRTarBase
hsa-miR-615	MI0003628	COCH	1690	miRTarBase
hsa-miR-615	MI0003628	CDC34	997	miRTarBase
hsa-miR-615	MI0003628	ATP5B	506	miRTarBase
hsa-miR-615	MI0003628	RPA1	6117	miRTarBase
hsa-miR-615	MI0003628	ST14	6768	miRTarBase
hsa-miR-615	MI0003628	ZC3H3	23144	miRTarBase
hsa-miR-615	MI0003628	PRDX2	7001	miRTarBase
hsa-miR-615	MI0003628	TPI1	7167	miRTarBase
hsa-miR-615	MI0003628	MCM2	4171	miRTarBase
hsa-miR-615	MI0003628	MCM2	4176	miRTarBase
hsa-miR-615	MI0003628	RALGDS	5900	miRTarBase
hsa-miR-615	MI0003628	POLR2A	5430	miRTarBase
hsa-miR-615	MI0003628	ATP13A2	23400	miRTarBase
hsa-miR-615	MI0003628	HEATR6	63897	miRTarBase
hsa-miR-615	MI0003628	MCM10	55388	miRTarBase
hsa-miR-615	MI0003628	UQCRFS1	7386	miRTarBase
hsa-miR-615	MI0003628	TONSL	4796	miRTarBase
hsa-miR-615	MI0003628	MAPKAPK5	8550	miRTarBase
hsa-miR-615	MI0003628	KPNB1	3837	miRTarBase
hsa-miR-615	MI0003628	MANBAL	63905	miRTarBase
hsa-miR-615	MI0003628	ZNF146	7705	miRTarBase
hsa-miR-615	MI0003628	MED13L	23389	miRTarBase
hsa-miR-615	MI0003628	ISLR2	57611	miRTarBase
hsa-miR-615	MI0003628	HMGN4	10473	miRTarBase
hsa-miR-615	MI0003628	HERPUD1	9709	miRTarBase
hsa-miR-615	MI0003628	RPL3	6122	miRTarBase
hsa-miR-615	MI0003628	CBFB	865	miRTarBase
hsa-miR-615	MI0003628	NCAPD2	9918	miRTarBase
hsa-miR-615	MI0003628	DHODH	1723	miRTarBase
hsa-miR-615	MI0003628	RTL8A	26071	miRTarBase
hsa-miR-615	MI0003628	CACFD1	11094	miRTarBase
hsa-miR-615	MI0003628	FAM107B	83641	miRTarBase
hsa-miR-615	MI0003628	HDLBP	3069	miRTarBase
hsa-miR-615	MI0003628	EIF3B	8662	miRTarBase
hsa-miR-615	MI0003628	ATP7B	540	miRTarBase
hsa-miR-615	MI0003628	SAR1A	56681	miRTarBase
hsa-miR-615	MI0003628	GAPDH	2597	miRTarBase
hsa-miR-615	MI0003628	RPS17	6218	miRTarBase
hsa-miR-615	MI0003628	RPL13	6137	miRTarBase
hsa-miR-615	MI0003628	TNPO2	30000	miRTarBase
hsa-miR-615	MI0003628	HOOK3	84376	miRTarBase
hsa-miR-615	MI0003628	ABCD1	215	miRTarBase
hsa-miR-615	MI0003628	HOXC13	3229	miRTarBase
hsa-miR-615	MI0003628	GIGYF1	64599	miRTarBase
hsa-miR-615	MI0003628	UBB	7314	miRTarBase
hsa-miR-615	MI0003628	SF3B2	10992	miRTarBase
hsa-miR-615	MI0003628	PRPF8	10594	miRTarBase
hsa-miR-615	MI0003628	RPS12	6206	miRTarBase
hsa-miR-615	MI0003628	NKX2-5	1482	miRTarBase
hsa-miR-615	MI0003628	RAPGEF2	9693	miRTarBase
hsa-miR-615	MI0003628	PRDX4	10549	miRTarBase
hsa-miR-615	MI0003628	HSPA1B	3304	miRTarBase
hsa-miR-615	MI0003628	FLNA	2316	miRTarBase
hsa-miR-615	MI0003628	TMEM132A	54972	miRTarBase
hsa-miR-615	MI0003628	ZCCHC12	170261	miRTarBase
hsa-miR-615	MI0003628	CSNK2A1	1457	miRTarBase
hsa-miR-615	MI0003628	TPRN	286262	miRTarBase
hsa-miR-615	MI0003628	BTN3A2	11118	miRTarBase
hsa-miR-615	MI0003628	BTN3A3	10384	miRTarBase
hsa-miR-615	MI0003628	NUDT9	53343	miRTarBase
hsa-miR-615	MI0003628	GART	2618	miRTarBase
hsa-miR-615	MI0003628	PLXNB2	23654	miRTarBase
hsa-miR-615	MI0003628	RPL36	25873	miRTarBase
hsa-miR-615	MI0003628	MUT	4594	miRTarBase
hsa-miR-615	MI0003628	PRKAB2	5565	miRTarBase
hsa-miR-615	MI0003628	CD2BP2	10421	miRTarBase
hsa-miR-615	MI0003628	SPCS3	60559	miRTarBase
hsa-miR-615	MI0003628	FUBP1	8880	miRTarBase
hsa-miR-615	MI0003628	CCT8	10694	miRTarBase
hsa-miR-615	MI0003628	PFDN2	5202	miRTarBase
hsa-miR-615	MI0003628	DGKE	8526	miRTarBase
hsa-miR-615	MI0003628	SHPK	23729	miRTarBase
hsa-miR-615	MI0003628	BSDC1	55108	miRTarBase
hsa-miR-615	MI0003628	IARS	3376	miRTarBase
hsa-miR-615	MI0003628	DPH2	1802	miRTarBase
hsa-miR-615	MI0003628	PITPNA	5306	miRTarBase
hsa-miR-615	MI0003628	NACA	4666	miRTarBase
hsa-miR-615	MI0003628	CCAR2	57805	miRTarBase
hsa-miR-615	MI0003628	FASN	2194	miRTarBase
hsa-miR-615	MI0003628	DVL3	1857	miRTarBase
hsa-miR-615	MI0003628	AARS	16	miRTarBase
hsa-miR-615	MI0003628	STK40	83931	miRTarBase
hsa-miR-615	MI0003628	DDX19A	55308	miRTarBase
hsa-miR-615	MI0003628	COG4	25839	miRTarBase
hsa-miR-615	MI0003628	RPL36AL	6166	miRTarBase
hsa-miR-615	MI0003628	CLSPN	63967	miRTarBase
hsa-miR-615	MI0003628	DLST	1743	miRTarBase
hsa-miR-615	MI0003628	MAD2L1BP	9587	miRTarBase
hsa-miR-615	MI0003628	POMK	84197	miRTarBase
hsa-miR-615	MI0003628	CLPP	8192	miRTarBase
hsa-miR-615	MI0003628	KLHL22	84861	miRTarBase
hsa-miR-615	MI0003628	WSB2	55884	miRTarBase
hsa-miR-615	MI0003628	CCDC180	100499483	miRTarBase
hsa-miR-615	MI0003628	CDK20	23552	miRTarBase
hsa-miR-615	MI0003628	SART1	9092	miRTarBase
hsa-miR-615	MI0003628	RPA3	6119	miRTarBase
hsa-miR-615	MI0003628	ARHGAP22	58504	miRTarBase
hsa-miR-615	MI0003628	BUB3	9184	miRTarBase
hsa-miR-615	MI0003628	ST3GAL2	6483	miRTarBase
hsa-miR-615	MI0003628	ZNF609	23060	miRTarBase
hsa-miR-615	MI0003628	DNAJC9	23234	miRTarBase
hsa-miR-615	MI0003628	MORC2	22880	miRTarBase
hsa-miR-615	MI0003628	BICD2	23299	miRTarBase
hsa-miR-615	MI0003628	EPHA7	2045	miRTarBase
hsa-miR-615	MI0003628	RHBDL3	162494	miRTarBase
hsa-miR-615	MI0003628	GLA	2717	miRTarBase
hsa-miR-615	MI0003628	ZFYVE16	9765	miRTarBase
hsa-miR-615	MI0003628	NUBP1	4682	miRTarBase
hsa-miR-615	MI0003628	SDE2	163859	miRTarBase
hsa-miR-615	MI0003628	COA7	65260	miRTarBase
hsa-miR-615	MI0003628	CWC22	57703	miRTarBase
hsa-miR-615	MI0003628	KAT2A	2648	miRTarBase
hsa-miR-615	MI0003628	THOC5	8563	miRTarBase
hsa-miR-615	MI0003628	GADD45A	1647	miRTarBase
hsa-miR-615	MI0003628	BAG6	7917	miRTarBase
hsa-miR-615	MI0003628	MYO19	80179	miRTarBase
hsa-miR-615	MI0003628	DESI1	27351	miRTarBase
hsa-miR-615	MI0003628	COMMD2	51122	miRTarBase
hsa-miR-615	MI0003628	VPS4A	27183	miRTarBase
hsa-miR-615	MI0003628	WDR1	9948	miRTarBase
hsa-miR-615	MI0003628	CTDSP2	10106	miRTarBase
hsa-miR-615	MI0003628	ACTN1	87	miRTarBase
hsa-miR-615	MI0003628	PCCB	5096	miRTarBase
hsa-miR-615	MI0003628	KMT2D	8085	miRTarBase
hsa-miR-615	MI0003628	WDR5	11091	miRTarBase
hsa-miR-615	MI0003628	ATP5E	514	miRTarBase
hsa-miR-615	MI0003628	PRRC2A	7916	miRTarBase
hsa-miR-615	MI0003628	RARA	5914	miRTarBase
hsa-miR-615	MI0003628	SNRNP70	6625	miRTarBase
hsa-miR-615	MI0003628	ELOVL6	79071	miRTarBase
hsa-miR-615	MI0003628	ARRB2	409	miRTarBase
hsa-miR-615	MI0003628	SPAG7	9552	miRTarBase
hsa-miR-615	MI0003628	HECTD3	79654	miRTarBase
hsa-miR-615	MI0003628	POLR3H	171568	miRTarBase
hsa-miR-615	MI0003628	MCM3AP	8888	miRTarBase
hsa-miR-615	MI0003628	UHRF1	29128	miRTarBase
hsa-miR-615	MI0003628	TIMM50	92609	miRTarBase
hsa-miR-615	MI0003628	MRPL23	6150	miRTarBase
hsa-miR-615	MI0003628	EXOC8	149371	miRTarBase
hsa-miR-615	MI0003628	ERLIN1	10613	miRTarBase
hsa-miR-615	MI0003628	E2F4	1874	miRTarBase
hsa-miR-615	MI0003628	LAMP1	3916	miRTarBase
hsa-miR-615	MI0003628	HEATR1	55127	miRTarBase
hsa-miR-615	MI0003628	TAGLN2	8407	miRTarBase
hsa-miR-615	MI0003628	HIST2H2BF	440689	miRTarBase
hsa-miR-615	MI0003628	NDUFA10	4705	miRTarBase
hsa-miR-615	MI0003628	EDF1	8721	miRTarBase
hsa-miR-615	MI0003628	HSP90AB1	3326	miRTarBase
hsa-miR-615	MI0003628	PPP5C	5536	miRTarBase
hsa-miR-615	MI0003628	LUZP1	7798	miRTarBase
hsa-miR-615	MI0003628	COL6A1	1291	miRTarBase
hsa-miR-615	MI0003628	RPL7A	6130	miRTarBase
hsa-miR-615	MI0003628	PIP5K1A	8394	miRTarBase
hsa-miR-615	MI0003628	PUM2	23369	miRTarBase
hsa-miR-615	MI0003628	PIM3	415116	miRTarBase
hsa-miR-615	MI0003628	EFCAB14	9813	miRTarBase
hsa-miR-615	MI0003628	TPT1	7178	miRTarBase
hsa-miR-615	MI0003628	ZC3HAV1	56829	miRTarBase
hsa-miR-615	MI0003628	RECQL4	9401	miRTarBase
hsa-miR-615	MI0003628	DENR	8562	miRTarBase
hsa-miR-615	MI0003628	HSPA9	3313	miRTarBase
hsa-miR-615	MI0003628	BIRC6	57448	miRTarBase
hsa-miR-615	MI0003628	LSM14A	26065	miRTarBase
hsa-miR-615	MI0003628	DNM1	1759	miRTarBase
hsa-miR-615	MI0003628	DNM1L	10059	miRTarBase
hsa-miR-615	MI0003628	ALKBH5	54890	miRTarBase
hsa-miR-615	MI0003628	SF3B3	23450	miRTarBase
hsa-miR-615	MI0003628	ACADVL	37	miRTarBase
hsa-miR-615	MI0003628	ZNF33A	7581	miRTarBase
hsa-miR-615	MI0003628	NBPF15	284565	miRTarBase
hsa-miR-615	MI0003628	MRPL46	26589	miRTarBase
hsa-miR-615	MI0003628	LRRC42	115353	miRTarBase
hsa-miR-615	MI0003628	DBN1	1627	miRTarBase
hsa-miR-615	MI0003628	AFF1	4299	miRTarBase
hsa-miR-615	MI0003628	PPP6R3	55291	miRTarBase
hsa-miR-615	MI0003628	NOMO3	408050	miRTarBase
hsa-miR-615	MI0003628	APOPT1	84334	miRTarBase
hsa-miR-615	MI0003628	DNAJA2	10294	miRTarBase
hsa-miR-615	MI0003628	RNF149	284996	miRTarBase
hsa-miR-615	MI0003628	HK1	3098	miRTarBase
hsa-miR-615	MI0003628	CHMP2A	27243	miRTarBase
hsa-miR-615	MI0003628	SLC25A1	6576	miRTarBase
hsa-miR-615	MI0003628	MLH3	27030	miRTarBase
hsa-miR-615	MI0003628	APBA2	321	miRTarBase
hsa-miR-615	MI0003628	MRPL54	116541	miRTarBase
hsa-miR-615	MI0003628	EDC3	80153	miRTarBase
hsa-miR-615	MI0003628	CDC42EP1	11135	miRTarBase
hsa-miR-615	MI0003628	PKN3	29941	miRTarBase
hsa-miR-615	MI0003628	YIPF3	25844	miRTarBase
hsa-miR-615	MI0003628	VIM	7431	miRTarBase
hsa-miR-615	MI0003628	GPSM1	26086	miRTarBase
hsa-miR-615	MI0003628	POLG	5428	miRTarBase
hsa-miR-615	MI0003628	ALDH2	217	miRTarBase
hsa-miR-615	MI0003628	CHD8	57680	miRTarBase
hsa-miR-615	MI0003628	DDX23	9416	miRTarBase
hsa-miR-615	MI0003628	ESRRA	2101	miRTarBase
hsa-miR-615	MI0003628	ZNF837	116412	miRTarBase
hsa-miR-615	MI0003628	PDCD5	9141	miRTarBase
hsa-miR-615	MI0003628	NCLN	56926	miRTarBase
hsa-miR-615	MI0003628	CUL4A	8451	miRTarBase
hsa-miR-615	MI0003628	NCL	4691	miRTarBase
hsa-miR-615	MI0003628	XYLT2	64132	miRTarBase
hsa-miR-615	MI0003628	SPEN	23013	miRTarBase
hsa-miR-615	MI0003628	PLBD2	196463	miRTarBase
hsa-miR-615	MI0003628	MOGS	7841	miRTarBase
hsa-miR-615	MI0003628	MDH2	4191	miRTarBase
hsa-miR-615	MI0003628	ZDHHC7	55625	miRTarBase
hsa-miR-615	MI0003628	HEXA	3073	miRTarBase
hsa-miR-615	MI0003628	SEPHS2	22928	miRTarBase
hsa-miR-615	MI0003628	C12orf57	113246	miRTarBase
hsa-miR-615	MI0003628	DIAPH1	1729	miRTarBase
hsa-miR-615	MI0003628	FNBP1	23048	miRTarBase
hsa-miR-615	MI0003628	HDGF	3068	miRTarBase
hsa-miR-615	MI0003628	MBOAT7	79143	miRTarBase
hsa-miR-615	MI0003628	FRAT2	23401	miRTarBase
hsa-miR-615	MI0003628	HIST1H4B	8366	miRTarBase
hsa-miR-615	MI0003628	CAMLG	819	miRTarBase
hsa-miR-615	MI0003628	SUPT6H	6830	miRTarBase
hsa-miR-615	MI0003628	HLA-B	3106	miRTarBase
hsa-miR-615	MI0003628	ALDH1A2	8854	miRTarBase
hsa-miR-615	MI0003628	JUP	3728	miRTarBase
hsa-miR-615	MI0003628	UQCR11	10975	miRTarBase
hsa-miR-615	MI0003628	IRF2BP2	359948	miRTarBase
hsa-miR-615	MI0003628	THG1L	54974	miRTarBase
hsa-miR-615	MI0003628	NBR1	4077	miRTarBase
hsa-miR-615	MI0003628	USP28	57646	miRTarBase
hsa-miR-615	MI0003628	PWWP2A	114825	miRTarBase
hsa-miR-615	MI0003628	RPP30	10556	miRTarBase
hsa-miR-615	MI0003628	FOXO3	2309	miRTarBase
hsa-miR-615	MI0003628	CDKN2A	1029	miRTarBase
hsa-miR-615	MI0003628	TMEM126B	55863	miRTarBase
hsa-miR-615	MI0003628	PGM2L1	283209	miRTarBase
hsa-miR-615	MI0003628	FURIN	5045	miRTarBase
hsa-miR-615	MI0003628	TIMELESS	8914	miRTarBase
hsa-miR-615	MI0003628	ELAC2	60528	miRTarBase
hsa-miR-615	MI0003628	BTG3	10950	miRTarBase
hsa-miR-615	MI0003628	VPS18	57617	miRTarBase
hsa-miR-615	MI0003628	HACD3	51495	miRTarBase
hsa-miR-615	MI0003628	PSMD2	5708	miRTarBase
hsa-miR-615	MI0003628	PFKP	5214	miRTarBase
hsa-miR-615	MI0003628	SF3A1	10291	miRTarBase
hsa-miR-615	MI0003628	PQBP1	10084	miRTarBase
hsa-miR-615	MI0003628	SMG1	23049	miRTarBase
hsa-miR-615	MI0003628	NMT1	4836	miRTarBase
hsa-miR-615	MI0003628	HNRNPC	3183	miRTarBase
hsa-miR-615	MI0003628	RFX3	5991	miRTarBase
hsa-miR-615	MI0003628	HNRNPM	4670	miRTarBase
hsa-miR-615	MI0003628	LSM12	124801	miRTarBase
hsa-miR-615	MI0003628	SUPT16H	11198	miRTarBase
hsa-miR-615	MI0003628	HNRNPA1	3178	miRTarBase
hsa-miR-615	MI0003628	PPP4C	5531	miRTarBase
hsa-miR-615	MI0003628	TMED2	10959	miRTarBase
hsa-miR-615	MI0003628	IFRD2	7866	miRTarBase
hsa-miR-615	MI0003628	CDK6	1021	miRTarBase
hsa-miR-615	MI0003628	KHDRBS1	10657	miRTarBase
hsa-miR-615	MI0003628	TPR	7175	miRTarBase
hsa-miR-615	MI0003628	ALDOA	226	miRTarBase
hsa-miR-615	MI0003628	IPO13	9670	miRTarBase
hsa-miR-615	MI0003628	MAPKAPK2	9261	miRTarBase
hsa-miR-615	MI0003628	LARP1	23367	miRTarBase
hsa-miR-615	MI0003628	PELP1	27043	miRTarBase
hsa-miR-615	MI0003628	GTF3C1	2975	miRTarBase
hsa-miR-615	MI0003628	SMDT1	91689	miRTarBase
hsa-miR-615	MI0003628	ITGA7	3679	miRTarBase
hsa-miR-615	MI0003628	SOCS7	30837	miRTarBase
hsa-miR-615	MI0003628	SOCS7	122809	miRTarBase
hsa-miR-615	MI0003628	SMC1A	8243	miRTarBase
hsa-miR-615	MI0003628	RAVER2	55225	miRTarBase
hsa-miR-615	MI0003628	TBP	6908	miRTarBase
hsa-miR-615	MI0003628	CLCC1	23155	miRTarBase
hsa-miR-615	MI0003628	GLUL	2752	miRTarBase
hsa-miR-615	MI0003628	PCNT	5116	miRTarBase
hsa-miR-615	MI0003628	CBS	875	miRTarBase
hsa-miR-615	MI0003628	EIF3M	10480	miRTarBase
hsa-miR-615	MI0003628	TOMM7	54543	miRTarBase
hsa-miR-615	MI0003628	BCAT2	587	miRTarBase
hsa-miR-615	MI0003628	CANX	821	miRTarBase
hsa-miR-615	MI0003628	NPTX1	4884	miRTarBase
hsa-miR-615	MI0003628	RPL21	6144	miRTarBase
hsa-miR-615	MI0003628	LRRC8D	55144	miRTarBase
hsa-miR-615	MI0003628	HMGCR	3156	miRTarBase
hsa-miR-615	MI0003628	EPDR1	54749	miRTarBase
hsa-miR-615	MI0003628	ACTN4	81	miRTarBase
hsa-miR-615	MI0003628	RPL29	6159	miRTarBase
hsa-miR-615	MI0003628	YDJC	150223	miRTarBase
hsa-miR-615	MI0003628	MAU2	23383	miRTarBase
hsa-miR-615	MI0003628	DNAAF5	54919	miRTarBase
hsa-miR-615	MI0003628	NMNAT2	23057	miRTarBase
hsa-miR-615	MI0003628	DYNC1H1	1778	miRTarBase
hsa-miR-615	MI0003628	SFPQ	6421	miRTarBase
hsa-miR-615	MI0003628	UBE2F	140739	miRTarBase
hsa-miR-615	MI0003628	PPP2R5D	5528	miRTarBase
hsa-miR-615	MI0003628	FOXK1	221937	miRTarBase
hsa-miR-615	MI0003628	IMMT	10989	miRTarBase
hsa-miR-615	MI0003628	RTCA	8634	miRTarBase
hsa-miR-615	MI0003628	EEF1A1	1915	miRTarBase
hsa-miR-615	MI0003628	STOML2	30968	miRTarBase
hsa-miR-615	MI0003628	MED8	112950	miRTarBase
hsa-miR-615	MI0003628	FBN2	2201	miRTarBase
hsa-miR-615	MI0003628	EHMT1	79813	miRTarBase
hsa-miR-615	MI0003628	EWSR1	2130	miRTarBase
hsa-miR-615	MI0003628	PROSER1	80209	miRTarBase
hsa-miR-615	MI0003628	MTHFD1L	25902	miRTarBase
hsa-miR-615	MI0003628	SLC7A2	6542	miRTarBase
hsa-miR-615	MI0003628	AP3D1	8943	miRTarBase
hsa-miR-615	MI0003628	UNKL	64718	miRTarBase
hsa-miR-615	MI0003628	LRRC41	10489	miRTarBase
hsa-miR-615	MI0003628	RPL7	6129	miRTarBase
hsa-miR-615	MI0003628	YTHDF2	51441	miRTarBase
hsa-miR-615	MI0003628	BEX4	56271	miRTarBase
hsa-miR-615	MI0003628	PHTF1	10745	miRTarBase
hsa-miR-615	MI0003628	MTSS1L	92154	miRTarBase
hsa-miR-615	MI0003628	TECR	9524	miRTarBase
hsa-miR-615	MI0003628	MSN	4478	miRTarBase
hsa-miR-615	MI0003628	CCDC142	84865	miRTarBase
hsa-miR-615	MI0003628	PCBP2	5094	miRTarBase
hsa-miR-615	MI0003628	MRPS15	64960	miRTarBase
hsa-miR-615	MI0003628	ARF1	375	miRTarBase
hsa-miR-615	MI0003628	PSMD13	5719	miRTarBase
hsa-miR-615	MI0003628	SEPHS1	22929	miRTarBase
hsa-miR-615	MI0003628	PEX14	5195	miRTarBase
hsa-miR-615	MI0003628	FYCO1	79443	miRTarBase
hsa-miR-615	MI0003628	ZER1	10444	miRTarBase
hsa-miR-615	MI0003628	SDHC	6391	miRTarBase
hsa-miR-615	MI0003628	SLC16A1	6566	miRTarBase
hsa-miR-615	MI0003628	APEH	327	miRTarBase
hsa-miR-615	MI0003628	PDXDC1	23042	miRTarBase
hsa-miR-615	MI0003628	HNRNPF	3185	miRTarBase
hsa-miR-615	MI0003628	THOP1	7064	miRTarBase
hsa-miR-615	MI0003628	HDAC7	51564	miRTarBase
hsa-miR-615	MI0003628	ANKRD36B	57730	miRTarBase
hsa-miR-615	MI0003628	NUP62	23636	miRTarBase
hsa-miR-615	MI0003628	SCARB1	949	miRTarBase
hsa-miR-615	MI0003628	BAG5	9529	miRTarBase
hsa-miR-615	MI0003628	MEGF8	1954	miRTarBase
hsa-miR-615	MI0003628	TEDC2	80178	miRTarBase
hsa-miR-615	MI0003628	ZFYVE27	118813	miRTarBase
hsa-miR-615	MI0003628	WTIP	126374	miRTarBase
hsa-miR-615	MI0003628	LRP12	29967	miRTarBase
hsa-miR-615	MI0003628	CCNF	899	miRTarBase
hsa-miR-615	MI0003628	EIF3D	8664	miRTarBase
hsa-miR-615	MI0003628	SEMA3E	9723	miRTarBase
hsa-miR-615	MI0003628	RNF19A	25897	miRTarBase
hsa-miR-615	MI0003628	MXI1	4601	miRTarBase
hsa-miR-615	MI0003628	ENTPD6	955	miRTarBase
hsa-miR-615	MI0003628	TAF15	8148	miRTarBase
hsa-miR-615	MI0003628	NR1I2	8856	miRTarBase
hsa-miR-615	MI0003628	KLHL8	57563	miRTarBase
hsa-miR-615	MI0003628	TOMM40	10452	miRTarBase
hsa-miR-615	MI0003628	CAPN15	6650	miRTarBase
hsa-miR-615	MI0003628	ARPC5L	81873	miRTarBase
hsa-miR-615	MI0003628	PSMD8	5714	miRTarBase
hsa-miR-615	MI0003628	USP36	57602	miRTarBase
hsa-miR-615	MI0003628	PDCD7	10081	miRTarBase
hsa-miR-615	MI0003628	NDUFAB1	4706	miRTarBase
hsa-miR-615	MI0003628	TACO1	51204	miRTarBase
hsa-miR-615	MI0003628	TRAPPC10	7109	miRTarBase
hsa-miR-615	MI0003628	FKBP15	23307	miRTarBase
hsa-miR-615	MI0003628	KPNA6	23633	miRTarBase
hsa-miR-615	MI0003628	CCDC137	339230	miRTarBase
hsa-miR-615	MI0003628	TRAP1	10131	miRTarBase
hsa-miR-615	MI0003628	TRAP1	7190	miRTarBase
hsa-miR-615	MI0003628	PCNX3	399909	miRTarBase
hsa-miR-615	MI0003628	KIAA0100	9703	miRTarBase
hsa-miR-615	MI0003628	HADHA	3030	miRTarBase
hsa-miR-615	MI0003628	ILF3	3609	miRTarBase
hsa-miR-615	MI0003628	RBAK	57786	miRTarBase
hsa-miR-615	MI0003628	ACAD9	28976	miRTarBase
hsa-miR-615	MI0003628	NOP2	4839	miRTarBase
hsa-miR-615	MI0003628	CNP	1267	miRTarBase
hsa-miR-615	MI0003628	DCTPP1	79077	miRTarBase
hsa-miR-615	MI0003628	ITPRIPL2	162073	miRTarBase
hsa-miR-615	MI0003628	PAPD4	167153	miRTarBase
hsa-miR-615	MI0003628	LONRF2	164832	miRTarBase
hsa-miR-615	MI0003628	WDR6	11180	miRTarBase
hsa-miR-615	MI0003628	PRRC2B	84726	miRTarBase
hsa-miR-615	MI0003628	UBA6	55236	miRTarBase
hsa-miR-615	MI0003628	RAD51D	5892	miRTarBase
hsa-miR-615	MI0003628	CDH2	1000	miRTarBase
hsa-miR-615	MI0003628	UBXN1	51035	miRTarBase
hsa-miR-615	MI0003628	RTEL1	51750	miRTarBase
hsa-miR-615	MI0003628	EXOC7	23265	miRTarBase
hsa-miR-615	MI0003628	PDRG1	81572	miRTarBase
hsa-miR-615	MI0003628	NSD1	64324	miRTarBase
hsa-miR-615	MI0003628	HIST2H2BE	8349	miRTarBase
hsa-miR-615	MI0003628	CARD19	84270	miRTarBase
hsa-miR-615	MI0003628	GDE1	51573	miRTarBase
hsa-miR-615	MI0003628	SIRPA	140885	miRTarBase
hsa-miR-615	MI0003628	PTPN21	11099	miRTarBase
hsa-miR-615	MI0003628	KMT2C	58508	miRTarBase
hsa-miR-615	MI0003628	WNK1	65125	miRTarBase
hsa-miR-615	MI0003628	NR1H2	7376	miRTarBase
hsa-miR-615	MI0003628	SHMT2	6472	miRTarBase
hsa-miR-615	MI0003628	MAGOH	4116	miRTarBase
hsa-miR-615	MI0003628	ATRX	546	miRTarBase
hsa-miR-615	MI0003628	TBC1D31	93594	miRTarBase
hsa-miR-615	MI0003628	SARAF	51669	miRTarBase
hsa-miR-615	MI0003628	CLTC	1213	miRTarBase
hsa-miR-615	MI0003628	REXO4	57109	miRTarBase
hsa-miR-615	MI0003628	HNRNPR	10236	miRTarBase
hsa-miR-615	MI0003628	PDCD11	22984	miRTarBase
hsa-miR-615	MI0003628	RAD23A	5886	miRTarBase
hsa-miR-615	MI0003628	SYVN1	84447	miRTarBase
hsa-miR-615	MI0003628	IMPDH1	3614	miRTarBase
hsa-miR-615	MI0003628	UVRAG	7405	miRTarBase
hsa-miR-615	MI0003628	SF3A3	10946	miRTarBase
hsa-miR-615	MI0003628	TUBB	203068	miRTarBase
hsa-miR-615	MI0003628	TUBB	7280	miRTarBase
hsa-miR-615	MI0003628	PRDM16	63976	miRTarBase
hsa-miR-615	MI0003628	MRPS18B	28973	miRTarBase
hsa-miR-615	MI0003628	PRICKLE4	29964	miRTarBase
hsa-miR-615	MI0003628	TMEM115	11070	miRTarBase
hsa-miR-615	MI0003628	FREM2	341640	miRTarBase
hsa-miR-615	MI0003628	CDC6	990	miRTarBase
hsa-miR-615	MI0003628	RALGAPB	57148	miRTarBase
hsa-miR-615	MI0003628	SALL3	27164	miRTarBase
hsa-miR-615	MI0003628	ALYREF	10189	miRTarBase
hsa-miR-615	MI0003628	PRELID3A	10650	miRTarBase
hsa-miR-615	MI0003628	P4HB	5034	miRTarBase
hsa-miR-615	MI0003628	RPS2	6187	miRTarBase
hsa-miR-615	MI0003628	SDK1	221935	miRTarBase
hsa-miR-615	MI0003628	SRCAP	10847	miRTarBase
hsa-miR-615	MI0003628	PPP1CB	5500	miRTarBase
hsa-miR-615	MI0003628	AKTIP	64400	miRTarBase
hsa-miR-615	MI0003628	MAZ	4150	miRTarBase
hsa-miR-615	MI0003628	LMNA	4000	miRTarBase
hsa-miR-615	MI0003628	ASB3	51130	miRTarBase
hsa-miR-615	MI0003628	H2AFV	94239	miRTarBase
hsa-miR-615	MI0003628	POLR1A	25885	miRTarBase
hsa-miR-615	MI0003628	REEP4	80346	miRTarBase
hsa-miR-615	MI0003628	CCT7	10574	miRTarBase
hsa-miR-615	MI0003628	LMTK2	22853	miRTarBase
hsa-miR-615	MI0003628	CTNND1	1500	miRTarBase
hsa-miR-615	MI0003628	PSAP	5660	miRTarBase
hsa-miR-615	MI0003628	ANO6	196527	miRTarBase
hsa-miR-615	MI0003628	ASB8	140461	miRTarBase
hsa-miR-615	MI0003628	SMC3	9126	miRTarBase
hsa-miR-615	MI0003628	H2AFY	9555	miRTarBase
hsa-miR-615	MI0003628	ASB6	140459	miRTarBase
hsa-miR-615	MI0003628	PNMA2	10687	miRTarBase
hsa-miR-615	MI0003628	CCND2	894	miRTarBase
hsa-miR-615	MI0003628	ATXN7L3	56970	miRTarBase
hsa-miR-615	MI0003628	EIF4A1	1973	miRTarBase
hsa-miR-615	MI0003628	PPIF	10105	miRTarBase
hsa-miR-615	MI0003628	DNM2	1785	miRTarBase
hsa-miR-615	MI0003628	LRPAP1	4043	miRTarBase
hsa-miR-615	MI0003628	PRR14L	253143	miRTarBase
hsa-miR-615	MI0003628	DDX11	1663	miRTarBase
hsa-miR-615	MI0003628	STK35	140901	miRTarBase
hsa-miR-615	MI0003628	ABCF1	23	miRTarBase
hsa-miR-615	MI0003628	TM9SF1	10548	miRTarBase
hsa-miR-615	MI0003628	NTRK3	4916	miRTarBase
hsa-miR-615	MI0003628	GANAB	23193	miRTarBase
hsa-miR-615	MI0003628	LDHB	3945	miRTarBase
hsa-miR-615	MI0003628	UBN1	29855	miRTarBase
hsa-miR-615	MI0003628	CELSR1	9620	miRTarBase
hsa-miR-615	MI0003628	DDX42	11325	miRTarBase
hsa-miR-615	MI0003628	FBXL19	54620	miRTarBase
hsa-miR-615	MI0003628	KIRREL1	55243	miRTarBase
hsa-miR-615	MI0003628	DLG3	1741	miRTarBase
hsa-miR-615	MI0003628	DLG3	4356	miRTarBase
hsa-miR-615	MI0003628	PTGFRN	5738	miRTarBase
hsa-miR-615	MI0003628	C11orf57	55216	miRTarBase
hsa-miR-615	MI0003628	NUDT16	131870	miRTarBase
hsa-miR-615	MI0003628	TAF6	6878	miRTarBase
hsa-miR-615	MI0003628	TPM3	7170	miRTarBase
hsa-miR-615	MI0003628	PAF1	54623	miRTarBase
hsa-miR-615	MI0003628	EZH1	2145	miRTarBase
hsa-miR-615	MI0003628	PLEC	5339	miRTarBase
hsa-miR-615	MI0003628	PTP4A2	8073	miRTarBase
hsa-miR-615	MI0003628	BCKDK	10295	miRTarBase
hsa-miR-615	MI0003628	U2AF2	11338	miRTarBase
hsa-miR-615	MI0003628	TUBB2B	347733	miRTarBase
hsa-miR-615	MI0003628	HNRNPK	3190	miRTarBase
hsa-miR-615	MI0003628	THRAP3	9967	miRTarBase
hsa-miR-615	MI0003628	IRS4	8471	miRTarBase
hsa-miR-615	MI0003628	TNRC18	84629	miRTarBase
hsa-miR-615	MI0003628	SMARCC2	6601	miRTarBase
hsa-miR-615	MI0003628	HIST1H2BD	3017	miRTarBase
hsa-miR-615	MI0003628	CPT1C	126129	miRTarBase
hsa-miR-615	MI0003628	RAB5B	5869	miRTarBase
hsa-miR-615	MI0003628	OGFR	11054	miRTarBase
hsa-miR-615	MI0003628	FOXN4	121643	miRTarBase
hsa-miR-615	MI0003628	CCHCR1	54535	miRTarBase
hsa-miR-615	MI0003628	SF3B1	23451	miRTarBase
hsa-miR-615	MI0003628	RNF185	91445	miRTarBase
hsa-miR-615	MI0003628	FAM109A	144717	miRTarBase
hsa-miR-615	MI0003628	KLHL11	55175	miRTarBase
hsa-miR-615	MI0003628	PEF1	553115	miRTarBase
hsa-miR-615	MI0003628	MATR3	9782	miRTarBase
hsa-miR-615	MI0003628	NUP50	10762	miRTarBase
hsa-miR-615	MI0003628	SOX8	30812	miRTarBase
hsa-miR-615	MI0003628	RPL5	6125	miRTarBase
hsa-miR-615	MI0003628	EMD	2010	miRTarBase
hsa-miR-615	MI0003628	TRIP12	9320	miRTarBase
hsa-miR-615	MI0003628	TIAM1	7074	miRTarBase
hsa-miR-615	MI0003628	TCOF1	6949	miRTarBase
hsa-miR-615	MI0003628	HIST2H2AB	317772	miRTarBase
hsa-miR-615	MI0003628	2019-09-02	4735	miRTarBase
hsa-miR-615	MI0003628	SPTBN1	6711	miRTarBase
hsa-miR-615	MI0003628	TM9SF2	9375	miRTarBase
hsa-miR-615	MI0003628	SLCO4C1	353189	miRTarBase
hsa-miR-615	MI0003628	HIST4H4	121504	miRTarBase
hsa-miR-615	MI0003628	YY1	7528	miRTarBase
hsa-miR-615	MI0003628	ITGA8	8516	miRTarBase
hsa-miR-615	MI0003628	TMEM33	55161	miRTarBase
hsa-miR-615	MI0003628	CTCF	10664	miRTarBase
hsa-miR-615	MI0003628	GINS2	51659	miRTarBase
hsa-miR-615	MI0003628	ZZEF1	23140	miRTarBase
hsa-miR-615	MI0003628	CERK	64781	miRTarBase
hsa-miR-615	MI0003628	MTG1	92170	miRTarBase
hsa-miR-615	MI0003628	FN1	2335	miRTarBase
hsa-miR-615	MI0003628	CEP250	11190	miRTarBase
hsa-miR-615	MI0003628	AQP3	360	miRTarBase
hsa-miR-615	MI0003628	PDS5A	23244	miRTarBase
hsa-miR-615	MI0003628	AGO1	26523	miRTarBase
hsa-miR-615	MI0003628	AP2B1	163	miRTarBase
hsa-miR-615	MI0003628	MIER3	166968	miRTarBase
hsa-miR-615	MI0003628	SGMS2	166929	miRTarBase
hsa-miR-615	MI0003628	RAN	5901	miRTarBase
hsa-miR-615	MI0003628	NRDC	4898	miRTarBase
hsa-miR-615	MI0003628	DEDD	9191	miRTarBase
hsa-miR-615	MI0003628	MYH14	79784	miRTarBase
hsa-miR-615	MI0003628	RALBP1	10928	miRTarBase
hsa-miR-615	MI0003628	SAE1	10055	miRTarBase
hsa-miR-615	MI0003628	HIPK2	28996	miRTarBase
hsa-miR-615	MI0003628	NOC2L	26155	miRTarBase
hsa-miR-615	MI0003628	SSR2	6746	miRTarBase
hsa-miR-615	MI0003628	HIST1H2BG	8339	miRTarBase
hsa-miR-615	MI0003628	CTC1	80169	miRTarBase
hsa-miR-615	MI0003628	RPL7L1	285855	miRTarBase
hsa-miR-615	MI0003628	WWP2	11060	miRTarBase
hsa-miR-615	MI0003628	IRF2BPL	64207	miRTarBase
hsa-miR-615	MI0003628	PRNP	5621	miRTarBase
hsa-miR-615	MI0003628	SMOX	54498	miRTarBase
hsa-miR-615	MI0003628	HNRNPA2B1	3181	miRTarBase
hsa-miR-615	MI0003628	ACOX1	51	miRTarBase
hsa-miR-615	MI0003628	SMARCA2	6595	miRTarBase
hsa-miR-615	MI0003628	TRIR	79002	miRTarBase
hsa-miR-615	MI0003628	MACF1	23499	miRTarBase
hsa-miR-615	MI0003628	LAMTOR2	28956	miRTarBase
hsa-miR-615	MI0003628	CHERP	10523	miRTarBase
hsa-miR-615	MI0003628	TBCB	1155	miRTarBase
hsa-miR-615	MI0003628	PLXNA1	5361	miRTarBase
hsa-miR-615	MI0003628	HNRNPA0	10949	miRTarBase
hsa-miR-615	MI0003628	CLN6	54982	miRTarBase
hsa-miR-615	MI0003628	USP7	7874	miRTarBase
hsa-miR-615	MI0003628	WIPI2	26100	miRTarBase
hsa-miR-615	MI0003628	ADAMTS1	9510	miRTarBase
hsa-miR-615	MI0003628	MTA2	9219	miRTarBase
hsa-miR-615	MI0003628	TYMS	7298	miRTarBase
hsa-miR-615	MI0003628	NSD2	7468	miRTarBase
hsa-miR-615	MI0003628	KRBA1	84626	miRTarBase
hsa-miR-615	MI0003628	SEC61A1	29927	miRTarBase
hsa-miR-615	MI0003628	RRP1B	23076	miRTarBase
hsa-miR-615	MI0003628	ARHGAP19	84986	miRTarBase
hsa-miR-615	MI0003628	UBE2G2	7327	miRTarBase
hsa-miR-615	MI0003628	AKAP8L	26993	miRTarBase
hsa-miR-615	MI0003628	TMCO4	255104	miRTarBase
hsa-miR-615	MI0003628	DRG1	4733	miRTarBase
hsa-miR-615	MI0003628	SEMA7A	8482	miRTarBase
hsa-miR-615	MI0003628	DXO	1797	miRTarBase
hsa-miR-615	MI0003628	AKAP11	11215	miRTarBase
hsa-miR-615	MI0003628	GALK1	2584	miRTarBase
hsa-miR-615	MI0003628	RPL31	6160	miRTarBase
hsa-miR-615	MI0003628	PHKG2	5261	miRTarBase
hsa-miR-615	MI0003628	DST	667	miRTarBase
hsa-miR-615	MI0003628	PVR	5817	miRTarBase
hsa-miR-615	MI0003628	FLCN	201163	miRTarBase
hsa-miR-615	MI0003628	UBA1	7317	miRTarBase
hsa-miR-615	MI0003628	PSMB7	5695	miRTarBase
hsa-miR-615	MI0003628	RCC2	55920	miRTarBase
hsa-miR-615	MI0003628	PLEKHB2	55041	miRTarBase
hsa-miR-615	MI0003628	HMGXB3	22993	miRTarBase
hsa-miR-615	MI0003628	PFDN6	10471	miRTarBase
hsa-miR-615	MI0003628	MYO1D	4642	miRTarBase
hsa-miR-615	MI0003628	MRPL38	64978	miRTarBase
hsa-miR-615	MI0003628	TLE3	7090	miRTarBase
hsa-miR-615	MI0003628	CYC1	1537	miRTarBase
hsa-miR-615	MI0003628	TUT1	64852	miRTarBase
hsa-miR-615	MI0003628	SEC16A	9919	miRTarBase
hsa-miR-615	MI0003628	MARS	4141	miRTarBase
hsa-miR-615	MI0003628	MBD1	4152	miRTarBase
hsa-miR-615	MI0003628	FAM120A	23196	miRTarBase
hsa-miR-615	MI0003628	UBE2C	11065	miRTarBase
hsa-miR-615	MI0003628	NRIP1	8204	miRTarBase
hsa-miR-615	MI0003628	PODXL2	50512	miRTarBase
hsa-miR-615	MI0003628	SOCS4	122809	miRTarBase
hsa-miR-615	MI0003628	SOCS4	9306	miRTarBase
hsa-miR-615	MI0003628	FBXL14	144699	miRTarBase
hsa-miR-615	MI0003628	PDGFC	56034	miRTarBase
hsa-miR-615	MI0003628	DPM3	54344	miRTarBase
hsa-miR-615	MI0003628	LIG1	3978	miRTarBase
hsa-miR-615	MI0003628	SRRM2	23524	miRTarBase
hsa-miR-615	MI0003628	SLK	9748	miRTarBase
hsa-miR-615	MI0003628	IREB2	3658	miRTarBase
hsa-miR-615	MI0003628	MARCKSL1	65108	miRTarBase
hsa-miR-615	MI0003628	EIF4G1	1981	miRTarBase
hsa-miR-615	MI0003628	SLC38A7	55238	miRTarBase
hsa-miR-615	MI0003628	MAGED1	9500	miRTarBase
hsa-miR-615	MI0003628	KIAA1191	57179	miRTarBase
hsa-miR-615	MI0003628	NONO	4841	miRTarBase
hsa-miR-615	MI0003628	EZR	7430	miRTarBase
hsa-miR-615	MI0003628	OGG1	4968	miRTarBase
hsa-miR-615	MI0003628	CD99	4267	miRTarBase
hsa-miR-615	MI0003628	FSTL1	11167	miRTarBase
hsa-miR-615	MI0003628	RADIL	55698	miRTarBase
hsa-miR-615	MI0003628	CHD5	26038	miRTarBase
hsa-miR-615	MI0003628	RBM8A	9939	miRTarBase
hsa-miR-615	MI0003628	MAP7D1	55700	miRTarBase
hsa-miR-615	MI0003628	ZNF263	10127	miRTarBase
hsa-miR-615	MI0003628	PKD1	5310	miRTarBase
hsa-miR-615	MI0003628	ABCC1	4363	miRTarBase
hsa-miR-615	MI0003628	HCFC1	3054	miRTarBase
hsa-miR-615	MI0003628	CKAP4	10970	miRTarBase
hsa-miR-615	MI0003628	DPP3	10072	miRTarBase
hsa-miR-615	MI0003628	NACC1	112939	miRTarBase
hsa-miR-615	MI0003628	GOLGA2	2801	miRTarBase
hsa-miR-615	MI0003628	CTPS1	1503	miRTarBase
hsa-miR-615	MI0003628	EHMT2	10919	miRTarBase
hsa-miR-615	MI0003628	GRK3	157	miRTarBase
hsa-miR-615	MI0003628	HIPK1	204851	miRTarBase
hsa-miR-615	MI0003628	RNPS1	10921	miRTarBase
hsa-miR-615	MI0003628	HS6ST1	9394	miRTarBase
hsa-miR-615	MI0003628	PGAM4	441531	miRTarBase
hsa-miR-615	MI0003628	PGAM1	5223	miRTarBase
hsa-miR-615	MI0003628	ADCK2	90956	miRTarBase
hsa-miR-615	MI0003628	TUBA1A	7846	miRTarBase
hsa-miR-615	MI0003628	TUBA1B	10376	miRTarBase
hsa-miR-615	MI0003628	CHST15	51363	miRTarBase
hsa-miR-615	MI0003628	SIL1	64374	miRTarBase
hsa-miR-615	MI0003628	LENG8	114823	miRTarBase
hsa-miR-615	MI0003628	PPP1R14B	26472	miRTarBase
hsa-miR-615	MI0003628	NCOR1	9611	miRTarBase
hsa-miR-615	MI0003628	PPP1R10	5514	miRTarBase
hsa-miR-615	MI0003628	WBP1L	54838	miRTarBase
hsa-miR-615	MI0003628	WDR33	55339	miRTarBase
hsa-miR-615	MI0003628	HIST2H3A	333932	miRTarBase
hsa-miR-615	MI0003628	SCARA3	51435	miRTarBase
hsa-miR-615	MI0003628	UGGT1	56886	miRTarBase
hsa-miR-615	MI0003628	SSH1	54434	miRTarBase
hsa-miR-615	MI0003628	VANGL1	81839	miRTarBase
hsa-miR-615	MI0003628	PLOD2	5352	miRTarBase
hsa-miR-615	MI0003628	RAB23	51715	miRTarBase
hsa-miR-615	MI0003628	MAP3K2	10746	miRTarBase
hsa-miR-615	MI0003628	POLR2B	5431	miRTarBase
hsa-miR-615	MI0003628	BCLAF1	9774	miRTarBase
hsa-miR-615	MI0003628	EBP	10682	miRTarBase
hsa-miR-615	MI0003628	VARS	7407	miRTarBase
hsa-miR-615	MI0003628	APBA3	9546	miRTarBase
hsa-miR-615	MI0003628	FAM98A	25940	miRTarBase
hsa-miR-615	MI0003628	TCERG1	10915	miRTarBase
hsa-miR-615	MI0003628	JARID2	3720	miRTarBase
hsa-miR-615	MI0003628	HYOU1	10525	miRTarBase
hsa-miR-615	MI0003628	PTPRU	10076	miRTarBase
hsa-miR-615	MI0003628	IL6ST	3572	miRTarBase
hsa-miR-615	MI0003628	RBM15B	29890	miRTarBase
hsa-miR-615	MI0003628	WDR62	284403	miRTarBase
hsa-miR-615	MI0003628	OSBPL11	114885	miRTarBase
hsa-miR-615	MI0003628	ASNS	440	miRTarBase
hsa-miR-615	MI0003628	DDIT4	54541	miRTarBase
hsa-miR-615	MI0003628	KIFC2	90990	miRTarBase
hsa-miR-615	MI0003628	TUSC2	11334	miRTarBase
hsa-miR-615	MI0003628	ALDOC	230	miRTarBase
hsa-miR-615	MI0003628	NRBP1	29959	miRTarBase
hsa-miR-615	MI0003628	MPP2	4355	miRTarBase
hsa-miR-615	MI0003628	ATN1	1822	miRTarBase
hsa-miR-615	MI0003628	PIN4	5303	miRTarBase
hsa-miR-615	MI0003628	THUMPD3	25917	miRTarBase
hsa-miR-615	MI0003628	SHKBP1	92799	miRTarBase
hsa-miR-615	MI0003628	NUPR1	26471	miRTarBase
hsa-miR-615	MI0003628	TATDN2	9797	miRTarBase
hsa-miR-615	MI0003628	ATPIF1	93974	miRTarBase
hsa-miR-615	MI0003628	ABLIM1	3983	miRTarBase
hsa-miR-615	MI0003628	C17orf51	339263	miRTarBase
hsa-miR-615	MI0003628	GGA3	23163	miRTarBase
hsa-miR-615	MI0003628	PABPN1	8106	miRTarBase
hsa-miR-615	MI0003628	CIC	23152	miRTarBase
hsa-miR-615	MI0003628	NEK9	91754	miRTarBase
hsa-miR-615	MI0003628	MCL1	4170	miRTarBase
hsa-miR-615	MI0003628	HRAS	3265	miRTarBase
hsa-miR-615	MI0003628	ZNF687	57592	miRTarBase
hsa-miR-615	MI0003628	IDH3B	3420	miRTarBase
hsa-miR-615	MI0003628	LRBA	987	miRTarBase
hsa-miR-615	MI0003628	KDM4B	23030	miRTarBase
hsa-miR-615	MI0003628	CAMSAP3	57662	miRTarBase
hsa-miR-615	MI0003628	ALDH1B1	219	miRTarBase
hsa-miR-615	MI0003628	C9orf78	51759	miRTarBase
hsa-miR-615	MI0003628	ZNF711	7552	miRTarBase
hsa-miR-615	MI0003628	NAF1	92345	miRTarBase
hsa-miR-615	MI0003628	H1F0	3005	miRTarBase
hsa-miR-615	MI0003628	HLA-A	3105	miRTarBase
hsa-miR-615	MI0003628	EPN2	22905	miRTarBase
hsa-miR-615	MI0003628	EP400	57634	miRTarBase
hsa-miR-615	MI0003628	GADD45GIP1	90480	miRTarBase
hsa-miR-615	MI0003628	HOXC4	3221	miRTarBase
hsa-miR-615	MI0003628	SUV39H1	6839	miRTarBase
hsa-miR-615	MI0003628	CIZ1	25792	miRTarBase
hsa-miR-615	MI0003628	ANKRD11	29123	miRTarBase
hsa-miR-615	MI0003628	NDUFS1	4719	miRTarBase
hsa-miR-615	MI0003628	ILF2	3608	miRTarBase
hsa-miR-615	MI0003628	MOV10	4343	miRTarBase
hsa-miR-615	MI0003628	SNRPD1	6632	miRTarBase
hsa-miR-615	MI0003628	SNRPD1	6633	miRTarBase
hsa-miR-615	MI0003628	NAT8L	339983	miRTarBase
hsa-miR-615	MI0003628	KDELR1	10945	miRTarBase
hsa-miR-615	MI0003628	MID1IP1	58526	miRTarBase
hsa-miR-615	MI0003628	GNPTAB	79158	miRTarBase
hsa-miR-615	MI0003628	RAB11FIP1	80223	miRTarBase
hsa-miR-615	MI0003628	MYO9A	4649	miRTarBase
hsa-miR-615	MI0003628	DLAT	1737	miRTarBase
hsa-miR-615	MI0003628	OGFOD1	55239	miRTarBase
hsa-miR-615	MI0003628	NIP7	51388	miRTarBase
hsa-miR-615	MI0003628	LRRC37A2	474170	miRTarBase
hsa-miR-615	MI0003628	LDLRAP1	26119	miRTarBase
hsa-miR-615	MI0003628	STAT1	6772	miRTarBase
hsa-miR-615	MI0003628	RRP1	8568	miRTarBase
hsa-miR-615	MI0003628	CDCA4	55038	miRTarBase
hsa-miR-615	MI0003628	TMSB10	9168	miRTarBase
hsa-miR-615	MI0003628	DNAJC10	54431	miRTarBase
hsa-miR-615	MI0003628	MKI67	4288	miRTarBase
hsa-miR-615	MI0003628	MDC1	9656	miRTarBase
hsa-miR-615	MI0003628	COL4A2	1284	miRTarBase
hsa-miR-615	MI0003628	ZNF784	147808	miRTarBase
hsa-miR-615	MI0003628	DDX55	57696	miRTarBase
hsa-miR-615	MI0003628	DAP3	7818	miRTarBase
hsa-miR-615	MI0003628	RGMA	56963	miRTarBase
hsa-miR-615	MI0003628	MRPS12	6183	miRTarBase
hsa-miR-615	MI0003628	FUS	2521	miRTarBase
hsa-miR-615	MI0003628	TCF3	6929	miRTarBase
hsa-miR-615	MI0003628	TCF3	83439	miRTarBase
hsa-miR-615	MI0003628	SLC4A2	6522	miRTarBase
hsa-miR-615	MI0003628	USP19	10869	miRTarBase
hsa-miR-615	MI0003628	MAGEF1	64110	miRTarBase
hsa-miR-615	MI0003628	SYK	6850	miRTarBase
hsa-miR-615	MI0003628	GDF11	10220	miRTarBase
hsa-miR-100	MI0000102	FOXN2	3344	miRTarBase
hsa-miR-100	MI0000102	SREK1IP1	285672	miRTarBase
hsa-miR-100	MI0000102	YWHAE	7531	miRTarBase
hsa-miR-100	MI0000102	RPL5	6125	miRTarBase
hsa-miR-100	MI0000102	MAP7D1	55700	miRTarBase
hsa-miR-100	MI0000102	NOP2	4839	miRTarBase
hsa-miR-100	MI0000102	CCNG1	900	miRTarBase
hsa-miR-100	MI0000102	SMAD7	4092	miRTarBase
hsa-miR-100	MI0000102	MAPK6	5597	miRTarBase
hsa-miR-100	MI0000102	UBE2E3	10477	miRTarBase
hsa-miR-100	MI0000102	LIX1L	128077	miRTarBase
hsa-miR-100	MI0000102	GNA13	10672	miRTarBase
hsa-miR-100	MI0000102	RLIM	51132	miRTarBase
hsa-miR-100	MI0000102	ATP2A2	488	miRTarBase
hsa-miR-100	MI0000102	KPNA2	3838	miRTarBase
hsa-miR-100	MI0000102	HIST2H2AA3	8337	miRTarBase
hsa-miR-100	MI0000102	YTHDC1	91746	miRTarBase
hsa-miR-100	MI0000102	ZNF511	118472	miRTarBase
hsa-miR-100	MI0000102	BAZ1B	9031	miRTarBase
hsa-miR-100	MI0000102	UBA2	10054	miRTarBase
hsa-miR-100	MI0000102	FOXP1	27086	miRTarBase
hsa-miR-100	MI0000102	APEX1	328	miRTarBase
hsa-miR-100	MI0000102	CUL2	8453	miRTarBase
hsa-miR-100	MI0000102	CCNYL1	151195	miRTarBase
hsa-miR-100	MI0000102	ORC2	4999	miRTarBase
hsa-miR-100	MI0000102	PANK3	79646	miRTarBase
hsa-miR-100	MI0000102	MAPK1IP1L	93487	miRTarBase
hsa-miR-100	MI0000102	MRPS33	51650	miRTarBase
hsa-miR-100	MI0000102	IARS	3376	miRTarBase
hsa-miR-100	MI0000102	RHPN2	85415	miRTarBase
hsa-miR-100	MI0000102	CBX3	11335	miRTarBase
hsa-miR-100	MI0000102	NDUFC2	4718	miRTarBase
hsa-miR-100	MI0000102	TSC22D1	8848	miRTarBase
hsa-miR-100	MI0000102	H3F3A	3020	miRTarBase
hsa-miR-100	MI0000102	FBXL15	79176	miRTarBase
hsa-miR-100	MI0000102	PFN2	5217	miRTarBase
hsa-miR-100	MI0000102	MKLN1	4289	miRTarBase
hsa-miR-100	MI0000102	MITD1	129531	miRTarBase
hsa-miR-100	MI0000102	RPS8	6202	miRTarBase
hsa-miR-100	MI0000102	SLC17A8	246213	miRTarBase
hsa-miR-100	MI0000102	NSF	4905	miRTarBase
hsa-miR-100	MI0000102	PRRC2C	23215	miRTarBase
hsa-miR-100	MI0000102	BCL10	8915	miRTarBase
hsa-miR-100	MI0000102	QSER1	79832	miRTarBase
hsa-miR-100	MI0000102	FAM221A	340277	miRTarBase
hsa-miR-100	MI0000102	RAB33B	83452	miRTarBase
hsa-miR-100	MI0000102	DCAF6	55827	miRTarBase
hsa-miR-100	MI0000102	RARS	5917	miRTarBase
hsa-miR-100	MI0000102	KATNBL1	79768	miRTarBase
hsa-miR-100	MI0000102	ATAT1	79969	miRTarBase
hsa-miR-100	MI0000102	SERBP1	26135	miRTarBase
hsa-miR-100	MI0000102	N4BP2	55728	miRTarBase
hsa-miR-100	MI0000102	RPL39L	116832	miRTarBase
hsa-miR-100	MI0000102	PTP4A1	7803	miRTarBase
hsa-miR-100	MI0000102	PSMA2	5683	miRTarBase
hsa-miR-100	MI0000102	MAP4	4134	miRTarBase
hsa-miR-100	MI0000102	UBN2	254048	miRTarBase
hsa-miR-100	MI0000102	TAPBP	6892	miRTarBase
hsa-miR-100	MI0000102	EDEM1	9695	miRTarBase
hsa-miR-100	MI0000102	ALG3	10195	miRTarBase
hsa-miR-100	MI0000102	FXN	2395	miRTarBase
hsa-miR-100	MI0000102	TEX264	51368	miRTarBase
hsa-miR-100	MI0000102	TCP1	6950	miRTarBase
hsa-miR-100	MI0000102	NDE1	54820	miRTarBase
hsa-miR-100	MI0000102	NFIA	4774	miRTarBase
hsa-miR-100	MI0000102	RPL36A	6173	miRTarBase
hsa-miR-100	MI0000102	RPL36A	6166	miRTarBase
hsa-miR-100	MI0000102	GNG5	2787	miRTarBase
hsa-miR-100	MI0000102	RIOK2	55781	miRTarBase
hsa-miR-100	MI0000102	H2AFV	94239	miRTarBase
hsa-miR-100	MI0000102	S100A10	6281	miRTarBase
hsa-miR-100	MI0000102	ACSL3	2181	miRTarBase
hsa-miR-100	MI0000102	DAZAP2	9802	miRTarBase
hsa-miR-100	MI0000102	PCBP2	5094	miRTarBase
hsa-miR-100	MI0000102	RAP2C	57826	miRTarBase
hsa-miR-100	MI0000102	C21orf91	54149	miRTarBase
hsa-miR-100	MI0000102	PRELID3B	51012	miRTarBase
hsa-miR-100	MI0000102	PTPN9	5780	miRTarBase
hsa-miR-100	MI0000102	AP3M1	26985	miRTarBase
hsa-miR-100	MI0000102	DDAH1	23576	miRTarBase
hsa-miR-100	MI0000102	HSPA14	51182	miRTarBase
hsa-miR-100	MI0000102	RPS27	6232	miRTarBase
hsa-miR-100	MI0000102	UNC50	25972	miRTarBase
hsa-miR-100	MI0000102	2019-09-10	151011	miRTarBase
hsa-miR-100	MI0000102	USP1	7398	miRTarBase
hsa-miR-100	MI0000102	KLHL15	80311	miRTarBase
hsa-miR-100	MI0000102	ATP5A1	498	miRTarBase
hsa-miR-100	MI0000102	XRCC5	7520	miRTarBase
hsa-miR-100	MI0000102	SNRNP27	11017	miRTarBase
hsa-miR-100	MI0000102	CAPNS1	826	miRTarBase
hsa-miR-100	MI0000102	OXCT1	5019	miRTarBase
hsa-miR-100	MI0000102	QKI	9444	miRTarBase
hsa-miR-100	MI0000102	MORF4L2	9643	miRTarBase
hsa-miR-100	MI0000102	VCP	7415	miRTarBase
hsa-miR-100	MI0000102	H2AFY	9555	miRTarBase
hsa-miR-100	MI0000102	ALDH9A1	223	miRTarBase
hsa-miR-100	MI0000102	OXA1L	5018	miRTarBase
hsa-miR-100	MI0000102	SGTB	54557	miRTarBase
hsa-miR-100	MI0000102	ANAPC11	51529	miRTarBase
hsa-miR-100	MI0000102	PSMG2	56984	miRTarBase
hsa-miR-100	MI0000102	EEF1A1	1915	miRTarBase
hsa-miR-100	MI0000102	INSIG1	3638	miRTarBase
hsa-miR-100	MI0000102	SNX4	8723	miRTarBase
hsa-miR-100	MI0000102	ATP1B3	483	miRTarBase
hsa-miR-100	MI0000102	SAP30L	79685	miRTarBase
hsa-miR-100	MI0000102	DPY19L4	286148	miRTarBase
hsa-miR-100	MI0000102	RPL7A	6130	miRTarBase
hsa-miR-100	MI0000102	RPL19	6143	miRTarBase
hsa-miR-100	MI0000102	NDUFA9	4704	miRTarBase
hsa-miR-100	MI0000102	CTDSPL2	51496	miRTarBase
hsa-miR-100	MI0000102	GFOD1	54438	miRTarBase
hsa-miR-100	MI0000102	GRB2	2885	miRTarBase
hsa-miR-100	MI0000102	GTF2H1	2965	miRTarBase
hsa-miR-100	MI0000102	RRM2	6241	miRTarBase
hsa-miR-100	MI0000102	ATP6AP1L	92270	miRTarBase
hsa-miR-100	MI0000102	TM9SF3	56889	miRTarBase
hsa-miR-100	MI0000102	SMG1	23049	miRTarBase
hsa-miR-100	MI0000102	ITM2B	9445	miRTarBase
hsa-miR-100	MI0000102	PSMA5	5686	miRTarBase
hsa-miR-100	MI0000102	MAFG	4097	miRTarBase
hsa-miR-100	MI0000102	DNMT1	1786	miRTarBase
hsa-miR-100	MI0000102	UBQLN1	29979	miRTarBase
hsa-miR-100	MI0000102	CUL1	8454	miRTarBase
hsa-miR-100	MI0000102	SEPSECS	51091	miRTarBase
hsa-miR-100	MI0000102	COX5A	9377	miRTarBase
hsa-miR-100	MI0000102	PCBP1	5093	miRTarBase
hsa-miR-100	MI0000102	ARPP19	10776	miRTarBase
hsa-miR-100	MI0000102	RPL15	6138	miRTarBase
hsa-miR-100	MI0000102	UBB	7314	miRTarBase
hsa-miR-100	MI0000102	RPL10A	4736	miRTarBase
hsa-miR-100	MI0000102	RPL26	6154	miRTarBase
hsa-miR-100	MI0000102	UTP4	84916	miRTarBase
hsa-miR-100	MI0000102	LRRC41	10489	miRTarBase
hsa-miR-100	MI0000102	APBA3	9546	miRTarBase
hsa-miR-100	MI0000102	HMGN1	3150	miRTarBase
hsa-miR-100	MI0000102	VPS45	11311	miRTarBase
hsa-miR-100	MI0000102	TMED4	222068	miRTarBase
hsa-miR-100	MI0000102	WDR4	10785	miRTarBase
hsa-miR-100	MI0000102	ACTB	60	miRTarBase
hsa-miR-100	MI0000102	ORMDL1	94101	miRTarBase
hsa-miR-100	MI0000102	GDE1	51573	miRTarBase
hsa-miR-100	MI0000102	EIF5A	1984	miRTarBase
hsa-miR-100	MI0000102	EIF5AL1	143244	miRTarBase
hsa-miR-100	MI0000102	SET	6418	miRTarBase
hsa-miR-100	MI0000102	DEAF1	10522	miRTarBase
hsa-miR-100	MI0000102	MED12	9968	miRTarBase
hsa-miR-100	MI0000102	ATP5L	10632	miRTarBase
hsa-miR-100	MI0000102	TERF2IP	54386	miRTarBase
hsa-miR-100	MI0000102	ABLIM1	3983	miRTarBase
hsa-miR-100	MI0000102	CCZ1B	221960	miRTarBase
hsa-miR-100	MI0000102	SRD5A3	79644	miRTarBase
hsa-miR-100	MI0000102	PRDX1	5052	miRTarBase
hsa-miR-100	MI0000102	NUDCD2	134492	miRTarBase
hsa-miR-100	MI0000102	GTPBP1	9567	miRTarBase
hsa-miR-100	MI0000102	ANAPC1	64682	miRTarBase
hsa-miR-100	MI0000102	NTAN1	123803	miRTarBase
hsa-miR-100	MI0000102	PNRC1	10957	miRTarBase
hsa-miR-100	MI0000102	CAMKK2	10645	miRTarBase
hsa-miR-100	MI0000102	DOLK	22845	miRTarBase
hsa-miR-100	MI0000102	RPLP1	6176	miRTarBase
hsa-miR-100	MI0000102	LIN28B	389421	miRTarBase
hsa-miR-100	MI0000102	CDC73	79577	miRTarBase
hsa-miR-100	MI0000102	PIKFYVE	200576	miRTarBase
hsa-miR-100	MI0000102	GOSR1	9527	miRTarBase
hsa-miR-100	MI0000102	SAT1	6303	miRTarBase
hsa-miR-100	MI0000102	HACD3	51495	miRTarBase
hsa-miR-100	MI0000102	RAB5C	5878	miRTarBase
hsa-miR-100	MI0000102	ORC5	5001	miRTarBase
hsa-miR-100	MI0000102	LDHB	3945	miRTarBase
hsa-miR-100	MI0000102	BECN1	8678	miRTarBase
hsa-miR-100	MI0000102	KDELR2	11014	miRTarBase
hsa-miR-100	MI0000102	HIST2H4B	554313	miRTarBase
hsa-miR-100	MI0000102	RCN2	5955	miRTarBase
hsa-miR-100	MI0000102	ACTR1B	10120	miRTarBase
hsa-miR-100	MI0000102	CREBBP	1387	miRTarBase
hsa-miR-100	MI0000102	NLRP3	114548	miRTarBase
hsa-miR-100	MI0000102	MBIP	51562	miRTarBase
hsa-miR-100	MI0000102	YBX3	8531	miRTarBase
hsa-miR-100	MI0000102	SMCHD1	23347	miRTarBase
hsa-miR-100	MI0000102	RPL21	6144	miRTarBase
hsa-miR-100	MI0000102	UBXN2B	137886	miRTarBase
hsa-miR-100	MI0000102	C9orf66	157983	miRTarBase
hsa-miR-100	MI0000102	HIST1H4C	8364	miRTarBase
hsa-miR-100	MI0000102	SOGA1	140710	miRTarBase
hsa-miR-100	MI0000102	RPS15A	6210	miRTarBase
hsa-miR-100	MI0000102	HMGB1	3146	miRTarBase
hsa-miR-100	MI0000102	RPL7	6129	miRTarBase
hsa-miR-100	MI0000102	SF3B3	23450	miRTarBase
hsa-miR-100	MI0000102	JPH1	56704	miRTarBase
hsa-miR-100	MI0000102	2019-03-01	64757	miRTarBase
hsa-miR-100	MI0000102	CUL5	8065	miRTarBase
hsa-miR-100	MI0000102	DCBLD1	285761	miRTarBase
hsa-miR-100	MI0000102	AGPAT3	56894	miRTarBase
hsa-miR-100	MI0000102	FARSB	10056	miRTarBase
hsa-miR-100	MI0000102	NDUFA2	4695	miRTarBase
hsa-miR-100	MI0000102	RPL10	6134	miRTarBase
hsa-miR-100	MI0000102	RPL31	6160	miRTarBase
hsa-miR-100	MI0000102	DDX21	9188	miRTarBase
hsa-miR-100	MI0000102	RPL14	9045	miRTarBase
hsa-miR-100	MI0000102	XRCC6	2547	miRTarBase
hsa-miR-100	MI0000102	COL4A1	1282	miRTarBase
hsa-miR-100	MI0000102	PATZ1	23598	miRTarBase
hsa-miR-100	MI0000102	RB1	5925	miRTarBase
hsa-miR-100	MI0000102	PAPSS1	9061	miRTarBase
hsa-miR-100	MI0000102	PAFAH1B1	5048	miRTarBase
hsa-miR-100	MI0000102	RPL7L1	285855	miRTarBase
hsa-miR-100	MI0000102	RPS15	6209	miRTarBase
hsa-miR-100	MI0000102	NIP7	51388	miRTarBase
hsa-miR-100	MI0000102	CTC1	80169	miRTarBase
hsa-miR-100	MI0000102	EWSR1	2130	miRTarBase
hsa-miR-100	MI0000102	MTO1	25821	miRTarBase
hsa-miR-100	MI0000102	ATP1A2	477	miRTarBase
hsa-miR-100	MI0000102	KANK1	23189	miRTarBase
hsa-miR-100	MI0000102	RAD51C	5889	miRTarBase
hsa-miR-100	MI0000102	WTIP	126374	miRTarBase
hsa-miR-100	MI0000102	ODC1	4953	miRTarBase
hsa-let-7c	MI0000064	R3HDM2	22864	miRTarBase
hsa-let-7c	MI0000064	IP6K1	9807	miRTarBase
hsa-let-7c	MI0000064	RFWD3	55159	miRTarBase
hsa-let-7c	MI0000064	CEP170B	283638	miRTarBase
hsa-let-7c	MI0000064	ACTB	60	miRTarBase
hsa-let-7c	MI0000064	ZNF614	80110	miRTarBase
hsa-let-7c	MI0000064	SAFB	6294	miRTarBase
hsa-let-7c	MI0000064	FOXO3	2309	miRTarBase
hsa-let-7c	MI0000064	METAP2	10988	miRTarBase
hsa-let-7c	MI0000064	KIAA0141	9812	miRTarBase
hsa-let-7c	MI0000064	CCNF	899	miRTarBase
hsa-let-7c	MI0000064	C5orf24	134553	miRTarBase
hsa-let-7c	MI0000064	CSTF2T	23283	miRTarBase
hsa-let-7c	MI0000064	TAZ	6901	miRTarBase
hsa-let-7c	MI0000064	PRRC2A	7916	miRTarBase
hsa-let-7c	MI0000064	RYR2	6262	miRTarBase
hsa-let-7c	MI0000064	ACTN4	81	miRTarBase
hsa-let-7c	MI0000064	SMARCD1	6602	miRTarBase
hsa-let-7c	MI0000064	INTS14	81556	miRTarBase
hsa-let-7c	MI0000064	RAB10	10890	miRTarBase
hsa-let-7c	MI0000064	PRPF8	10594	miRTarBase
hsa-let-7c	MI0000064	SRCAP	10847	miRTarBase
hsa-let-7c	MI0000064	PPP2R5E	5529	miRTarBase
hsa-let-7c	MI0000064	BCOR	54880	miRTarBase
hsa-let-7c	MI0000064	CACNG8	59283	miRTarBase
hsa-let-7c	MI0000064	CDC42BPA	8476	miRTarBase
hsa-let-7c	MI0000064	CBL	867	miRTarBase
hsa-let-7c	MI0000064	PEX6	5190	miRTarBase
hsa-let-7c	MI0000064	RPS4Y1	6192	miRTarBase
hsa-let-7c	MI0000064	NME4	4833	miRTarBase
hsa-let-7c	MI0000064	DCAF7	10238	miRTarBase
hsa-let-7c	MI0000064	RPL18A	6142	miRTarBase
hsa-let-7c	MI0000064	NUDT21	11051	miRTarBase
hsa-let-7c	MI0000064	KRTAP19-1	337882	miRTarBase
hsa-let-7c	MI0000064	PAK4	10298	miRTarBase
hsa-let-7c	MI0000064	LECT2	3950	miRTarBase
hsa-let-7c	MI0000064	TMEM165	55858	miRTarBase
hsa-let-7c	MI0000064	ITGA10	8515	miRTarBase
hsa-let-7c	MI0000064	DNAJC16	23341	miRTarBase
hsa-let-7c	MI0000064	METTL25	84190	miRTarBase
hsa-let-7c	MI0000064	GATAD2B	57459	miRTarBase
hsa-let-7c	MI0000064	SLK	9748	miRTarBase
hsa-let-7c	MI0000064	EIF3C	8663	miRTarBase
hsa-let-7c	MI0000064	EIF3A	8661	miRTarBase
hsa-let-7c	MI0000064	EIF3A	3692	miRTarBase
hsa-let-7c	MI0000064	SLC25A1	6576	miRTarBase
hsa-let-7c	MI0000064	EWSR1	2130	miRTarBase
hsa-let-7c	MI0000064	DUSP7	1849	miRTarBase
hsa-let-7c	MI0000064	DDX18	8886	miRTarBase
hsa-let-7c	MI0000064	CACHD1	57685	miRTarBase
hsa-let-7c	MI0000064	MBTPS1	8720	miRTarBase
hsa-let-7c	MI0000064	CNOT3	4849	miRTarBase
hsa-let-7c	MI0000064	IPO7	10527	miRTarBase
hsa-let-7c	MI0000064	EYA3	2140	miRTarBase
hsa-let-7c	MI0000064	SBDS	51119	miRTarBase
hsa-let-7c	MI0000064	RPL3	6122	miRTarBase
hsa-let-7c	MI0000064	WDR61	80349	miRTarBase
hsa-let-7c	MI0000064	SIRT1	23411	miRTarBase
hsa-let-7c	MI0000064	RAB5B	5869	miRTarBase
hsa-let-7c	MI0000064	CCNC	892	miRTarBase
hsa-let-7c	MI0000064	SNW1	22938	miRTarBase
hsa-let-7c	MI0000064	COPS3	8533	miRTarBase
hsa-let-7c	MI0000064	FKBP10	60681	miRTarBase
hsa-let-7c	MI0000064	GSK3A	2931	miRTarBase
hsa-let-7c	MI0000064	PTP4A2	8073	miRTarBase
hsa-let-7c	MI0000064	PSMG2	56984	miRTarBase
hsa-let-7c	MI0000064	BSDC1	55108	miRTarBase
hsa-let-7c	MI0000064	ACVR1B	91	miRTarBase
hsa-let-7c	MI0000064	RPS13	6207	miRTarBase
hsa-let-7c	MI0000064	FAM103A1	83640	miRTarBase
hsa-let-7c	MI0000064	TAF5L	27097	miRTarBase
hsa-let-7c	MI0000064	SLC10A3	8273	miRTarBase
hsa-let-7c	MI0000064	SH3D19	152503	miRTarBase
hsa-let-7c	MI0000064	BRD2	6046	miRTarBase
hsa-let-7c	MI0000064	ATP2A2	488	miRTarBase
hsa-let-7c	MI0000064	C9orf40	55071	miRTarBase
hsa-let-7c	MI0000064	SLC35A4	113829	miRTarBase
hsa-let-7c	MI0000064	ZNF581	51545	miRTarBase
hsa-let-7c	MI0000064	ANKRD17	26057	miRTarBase
hsa-let-7c	MI0000064	JARID2	3720	miRTarBase
hsa-let-7c	MI0000064	CBX6	23466	miRTarBase
hsa-let-7c	MI0000064	GORASP2	26003	miRTarBase
hsa-let-7c	MI0000064	TMEM184B	25829	miRTarBase
hsa-let-7c	MI0000064	CHST6	4166	miRTarBase
hsa-let-7c	MI0000064	CHD1	1105	miRTarBase
hsa-let-7c	MI0000064	SUPT16H	11198	miRTarBase
hsa-let-7c	MI0000064	NUP58	9818	miRTarBase
hsa-let-7c	MI0000064	LTA4H	4048	miRTarBase
hsa-let-7c	MI0000064	TUT1	64852	miRTarBase
hsa-let-7c	MI0000064	PCGF3	10336	miRTarBase
hsa-let-7c	MI0000064	BPTF	2186	miRTarBase
hsa-let-7c	MI0000064	ARMC8	25852	miRTarBase
hsa-let-7c	MI0000064	ARL6IP1	23204	miRTarBase
hsa-let-7c	MI0000064	LDHA	3939	miRTarBase
hsa-let-7c	MI0000064	RAB34	83871	miRTarBase
hsa-let-7c	MI0000064	PTGES2	80142	miRTarBase
hsa-let-7c	MI0000064	LAMTOR1	55004	miRTarBase
hsa-let-7c	MI0000064	KIF1B	23095	miRTarBase
hsa-let-7c	MI0000064	HUWE1	10075	miRTarBase
hsa-let-7c	MI0000064	DNAJC6	9829	miRTarBase
hsa-let-7c	MI0000064	SNUPN	10073	miRTarBase
hsa-let-7c	MI0000064	SF3B4	10262	miRTarBase
hsa-let-7c	MI0000064	PCF11	51585	miRTarBase
hsa-let-7c	MI0000064	WDR3	10885	miRTarBase
hsa-let-7c	MI0000064	MKRN1	23608	miRTarBase
hsa-let-7c	MI0000064	ZNF526	116115	miRTarBase
hsa-let-7c	MI0000064	PSMB2	5690	miRTarBase
hsa-let-7c	MI0000064	RAPGEFL1	51195	miRTarBase
hsa-let-7c	MI0000064	DCTN5	84516	miRTarBase
hsa-let-7c	MI0000064	PPAN-P2RY11	692312	miRTarBase
hsa-let-7c	MI0000064	DOT1L	84444	miRTarBase
hsa-let-7c	MI0000064	AGO1	26523	miRTarBase
hsa-let-7c	MI0000064	TAF5	6877	miRTarBase
hsa-let-7c	MI0000064	FANCI	55215	miRTarBase
hsa-let-7c	MI0000064	NOTCH2	4853	miRTarBase
hsa-let-7c	MI0000064	PRAF2	11230	miRTarBase
hsa-let-7c	MI0000064	MEF2C	4208	miRTarBase
hsa-let-7c	MI0000064	UBA52	7311	miRTarBase
hsa-let-7c	MI0000064	CSNK2A1	1457	miRTarBase
hsa-let-7c	MI0000064	RPS24	6229	miRTarBase
hsa-let-7c	MI0000064	GARS	2617	miRTarBase
hsa-let-7c	MI0000064	SMARCC1	6599	miRTarBase
hsa-let-7c	MI0000064	IRF2BP2	359948	miRTarBase
hsa-let-7c	MI0000064	TLNRD1	59274	miRTarBase
hsa-let-7c	MI0000064	BAZ1B	9031	miRTarBase
hsa-let-7c	MI0000064	TRRAP	8295	miRTarBase
hsa-let-7c	MI0000064	GTF3C1	2975	miRTarBase
hsa-let-7c	MI0000064	FUT10	84750	miRTarBase
hsa-let-7c	MI0000064	MYO9A	4649	miRTarBase
hsa-let-7c	MI0000064	SLC12A2	6558	miRTarBase
hsa-let-7c	MI0000064	CCNB2	9133	miRTarBase
hsa-let-7c	MI0000064	PTK2	5747	miRTarBase
hsa-let-7c	MI0000064	AIDA	64853	miRTarBase
hsa-let-7c	MI0000064	WBP11	51729	miRTarBase
hsa-let-7c	MI0000064	RALGAPA2	57186	miRTarBase
hsa-let-7c	MI0000064	FLNB	2317	miRTarBase
hsa-let-7c	MI0000064	QKI	9444	miRTarBase
hsa-let-7c	MI0000064	FZD8	8325	miRTarBase
hsa-let-7c	MI0000064	CCNG1	900	miRTarBase
hsa-let-7c	MI0000064	NPTX1	4884	miRTarBase
hsa-let-7c	MI0000064	DHX9	1660	miRTarBase
hsa-miR-100	MI0000102	IGF2	3481	miRTarBase
hsa-miR-145	MI0000461	EPAS1	2034	miRTarBase
hsa-miR-145	MI0000461	ETS1	2113	miRTarBase
hsa-miR-145	MI0000461	RREB1	6239	miRTarBase
hsa-let-7c	MI0000064	IGF1R	3480	miRTarBase
hsa-miR-145	MI0000461	COL5A1	1289	miRTarBase
hsa-miR-145	MI0000461	CD44	960	miRTarBase
hsa-miR-145	MI0000461	BRAF	673	miRTarBase
hsa-miR-100	MI0000102	AKT1	207	miRTarBase
hsa-miR-145	MI0000461	ACTB	60	miRTarBase
hsa-miR-145	MI0000461	SOX9	6662	miRTarBase
hsa-miR-145	MI0000461	SOX11	6664	miRTarBase
hsa-miR-145	MI0000461	SMAD3	4088	miRTarBase
hsa-miR-145	MI0000461	SMAD5	4090	miRTarBase
hsa-miR-145	MI0000461	TGFBR2	7048	miRTarBase
hsa-miR-145	MI0000461	SMAD4	4089	miRTarBase
hsa-miR-145	MI0000461	MAP2K4	6416	miRTarBase
hsa-miR-145	MI0000461	PDGFD	80310	miRTarBase
hsa-miR-145	MI0000461	CTNND1	1500	miRTarBase
hsa-miR-145	MI0000461	P4HA1	5033	miRTarBase
hsa-miR-145	MI0000461	MAP4K2	5871	miRTarBase
hsa-miR-145	MI0000461	MAP3K11	4296	miRTarBase
hsa-miR-145	MI0000461	ERBB4	2066	miRTarBase
hsa-miR-145	MI0000461	SP1	6667	miRTarBase
hsa-miR-33b	MI0003646	PIM1	5292	miRTarBase
hsa-let-7c	MI0000064	ITGB3	3690	miRTarBase
hsa-miR-100	MI0000102	SMARCA5	8467	miRTarBase
hsa-let-7c	MI0000064	MAP4K3	8491	miRTarBase
hsa-miR-145	MI0000461	TNFSF13	8741	miRTarBase
hsa-miR-100	MI0000102	HS3ST2	9956	miRTarBase
hsa-let-7c	MI0000064	IL10	3586	miRTarBase
hsa-miR-145	MI0000461	CDK6	1021	miRTarBase
hsa-miR-100	MI0000102	NCOR2	9612	miRTarBase
hsa-miR-100	MI0000102	HOXA1	3198	miRTarBase
hsa-miR-100	MI0000102	ZNF215	7762	miRTarBase
hsa-miR-100	MI0000102	THAP2	83591	miRTarBase
hsa-miR-33b	MI0003646	PCK1	5105	miRTarBase
hsa-miR-33b	MI0003646	G6PC	2538	miRTarBase
hsa-miR-33b	MI0003646	SRC	6714	miRTarBase
hsa-miR-33b	MI0003646	RORA	6095	miRTarBase
hsa-miR-33b	MI0003646	CREB1	1385	miRTarBase
hsa-miR-519c	MI0003148	TPRG1L	127262	miRTarBase
hsa-miR-519c	MI0003148	SHOC2	8036	miRTarBase
hsa-miR-519c	MI0003148	REEP3	221035	miRTarBase
hsa-miR-519c	MI0003148	MSANTD4	84437	miRTarBase
hsa-miR-519c	MI0003148	NRAS	4893	miRTarBase
hsa-miR-33b	MI0003646	FAM46C	54855	miRTarBase
hsa-miR-519c	MI0003148	PPP6R3	55291	miRTarBase
hsa-let-7c	MI0000064	RPS3	6188	miRTarBase
hsa-let-7c	MI0000064	IVNS1ABP	10625	miRTarBase
hsa-miR-519c	MI0003148	PPP1R15B	84919	miRTarBase
hsa-let-7c	MI0000064	ADIPOR2	79602	miRTarBase
hsa-miR-519c	MI0003148	ETNK1	55500	miRTarBase
hsa-miR-519c	MI0003148	ARID4B	51742	miRTarBase
hsa-miR-519c	MI0003148	CCND2	894	miRTarBase
hsa-miR-519c	MI0003148	ZBTB18	10472	miRTarBase
hsa-miR-519c	MI0003148	DAZAP2	9802	miRTarBase
hsa-miR-519c	MI0003148	CLIC4	25932	miRTarBase
hsa-let-7c	MI0000064	ESPL1	9700	miRTarBase
hsa-miR-519c	MI0003148	GDF11	10220	miRTarBase
hsa-miR-519c	MI0003148	RAB5B	5869	miRTarBase
hsa-miR-33b	MI0003646	HMGA2	8091	miRTarBase
hsa-let-7c	MI0000064	HMGA2	8091	miRTarBase
hsa-let-7c	MI0000064	TMTC3	160418	miRTarBase
hsa-let-7c	MI0000064	TXLNA	200081	miRTarBase
hsa-let-7c	MI0000064	NHLRC3	387921	miRTarBase
hsa-let-7c	MI0000064	FOXO1	2308	miRTarBase
hsa-miR-519c	MI0003148	RB1	5925	miRTarBase
hsa-let-7c	MI0000064	FNDC3A	22862	miRTarBase
hsa-miR-519c	MI0003148	FANCM	57697	miRTarBase
hsa-miR-519c	MI0003148	SMOC1	64093	miRTarBase
hsa-miR-519c	MI0003148	CMPK1	51727	miRTarBase
hsa-let-7c	MI0000064	CALM1	801	miRTarBase
hsa-miR-519c	MI0003148	ZFYVE9	9372	miRTarBase
hsa-miR-519c	MI0003148	GLCE	26035	miRTarBase
hsa-let-7c	MI0000064	ARID3B	10620	miRTarBase
hsa-miR-615	MI0003628	MAZ	4150	miRTarBase
hsa-miR-519c	MI0003148	COX10	1352	miRTarBase
hsa-miR-519c	MI0003148	PITPNA	5306	miRTarBase
hsa-let-7c	MI0000064	SMCR8	140775	miRTarBase
hsa-let-7c	MI0000064	RAB5C	5878	miRTarBase
hsa-let-7c	MI0000064	IGF2BP1	10642	miRTarBase
hsa-let-7c	MI0000064	VEZF1	7716	miRTarBase
hsa-miR-519c	MI0003148	CCDC137	339230	miRTarBase
hsa-miR-519c	MI0003148	SMAD4	4089	miRTarBase
hsa-let-7c	MI0000064	ONECUT2	9480	miRTarBase
hsa-miR-519c	MI0003148	PMAIP1	5366	miRTarBase
hsa-miR-519c	MI0003148	LDLR	3949	miRTarBase
hsa-miR-519c	MI0003148	MIDN	90007	miRTarBase
hsa-let-7c	MI0000064	ZCCHC3	85364	miRTarBase
hsa-let-7c	MI0000064	BACH1	571	miRTarBase
hsa-miR-519c	MI0003148	IFNAR2	3455	miRTarBase
hsa-miR-519c	MI0003148	SLC5A3	6526	miRTarBase
hsa-miR-519c	MI0003148	NABP1	64859	miRTarBase
hsa-miR-138	MI0000476	FAM126B	285172	miRTarBase
hsa-miR-33b	MI0003646	YWHAH	7533	miRTarBase
hsa-let-7c	MI0000064	HMGXB4	10042	miRTarBase
hsa-miR-519c	MI0003148	UBXN2A	165324	miRTarBase
hsa-miR-519c	MI0003148	2019-09-02	4735	miRTarBase
hsa-miR-519c	MI0003148	MAPRE3	22924	miRTarBase
hsa-miR-519c	MI0003148	U2SURP	23350	miRTarBase
hsa-miR-519c	MI0003148	MBNL1	4154	miRTarBase
hsa-miR-519c	MI0003148	TGFBR2	7048	miRTarBase
hsa-miR-100	MI0000102	KBTBD8	84541	miRTarBase
hsa-miR-519c	MI0003148	C3orf38	285237	miRTarBase
hsa-miR-519c	MI0003148	SLAIN2	57606	miRTarBase
hsa-let-7c	MI0000064	SMARCAD1	56916	miRTarBase
hsa-miR-519c	MI0003148	ANKH	56172	miRTarBase
hsa-let-7c	MI0000064	GRPEL2	134266	miRTarBase
hsa-miR-519c	MI0003148	FCHO2	115548	miRTarBase
hsa-let-7c	MI0000064	CD164	8763	miRTarBase
hsa-miR-519c	MI0003148	QKI	9444	miRTarBase
hsa-miR-519c	MI0003148	SOX4	6659	miRTarBase
hsa-let-7c	MI0000064	ABT1	29777	miRTarBase
hsa-miR-519c	MI0003148	TJAP1	93643	miRTarBase
hsa-miR-519c	MI0003148	ENPP4	22875	miRTarBase
hsa-miR-519c	MI0003148	CENPQ	55166	miRTarBase
hsa-let-7c	MI0000064	RRAGD	58528	miRTarBase
hsa-miR-519c	MI0003148	HBP1	26959	miRTarBase
hsa-miR-519c	MI0003148	DNAJB9	4189	miRTarBase
hsa-miR-519c	MI0003148	UBN2	254048	miRTarBase
hsa-miR-33b	MI0003646	RBM33	155435	miRTarBase
hsa-let-7c	MI0000064	HNRNPA2B1	3181	miRTarBase
hsa-miR-519c	MI0003148	PURB	5814	miRTarBase
hsa-miR-519c	MI0003148	PHTF2	57157	miRTarBase
hsa-miR-100	MI0000102	LEPROTL1	23484	miRTarBase
hsa-miR-519c	MI0003148	MIGA2	84895	miRTarBase
hsa-miR-519c	MI0003148	TMEM2	23670	miRTarBase
hsa-miR-519c	MI0003148	HABP4	22927	miRTarBase
hsa-let-7c	MI0000064	KLHL15	80311	miRTarBase
hsa-let-7c	MI0000064	MDM4	4194	miRTarBase
hsa-miR-145	MI0000461	ZFYVE9	9372	miRTarBase
hsa-let-7c	MI0000064	STK4	6789	miRTarBase
hsa-let-7c	MI0000064	PDE12	201626	miRTarBase
hsa-miR-519c	MI0003148	TAF7	6879	miRTarBase
hsa-miR-138	MI0000476	ERGIC1	57222	miRTarBase
hsa-let-7c	MI0000064	CALU	813	miRTarBase
hsa-let-7c	MI0000064	POLR3D	661	miRTarBase
hsa-miR-519c	MI0003148	BICD2	23299	miRTarBase
hsa-miR-33b	MI0003646	XIAP	331	miRTarBase
hsa-miR-519c	MI0003148	MPP5	64398	miRTarBase
hsa-miR-519c	MI0003148	BTF3L4	91408	miRTarBase
hsa-miR-519c	MI0003148	NFAT5	10725	miRTarBase
hsa-miR-33b	MI0003646	NUFIP2	57532	miRTarBase
hsa-miR-145	MI0000461	NUFIP2	57532	miRTarBase
hsa-miR-519c	MI0003148	LASP1	3927	miRTarBase
hsa-miR-100	MI0000102	HNRNPUL1	11100	miRTarBase
hsa-let-7c	MI0000064	TNFSF9	8744	miRTarBase
hsa-miR-519c	MI0003148	MAVS	57506	miRTarBase
hsa-let-7c	MI0000064	NCOA3	8202	miRTarBase
hsa-miR-519c	MI0003148	PRNP	5621	miRTarBase
hsa-miR-519c	MI0003148	NRBP1	29959	miRTarBase
hsa-let-7c	MI0000064	WNT5A	7474	miRTarBase
hsa-miR-519c	MI0003148	MSMO1	6307	miRTarBase
hsa-miR-519c	MI0003148	CREBRF	153222	miRTarBase
hsa-miR-100	MI0000102	SGK1	6446	miRTarBase
hsa-let-7c	MI0000064	HMGA1	3159	miRTarBase
hsa-miR-519c	MI0003148	TAX1BP1	8887	miRTarBase
hsa-miR-519c	MI0003148	FZD6	8323	miRTarBase
hsa-miR-519c	MI0003148	PRPF4	9128	miRTarBase
hsa-miR-519c	MI0003148	ZBTB5	9925	miRTarBase
hsa-miR-519c	MI0003148	ACSL4	2182	miRTarBase
hsa-let-7c	MI0000064	DDX3Y	8653	miRTarBase
hsa-miR-519c	MI0003148	SAMD8	142891	miRTarBase
hsa-miR-519c	MI0003148	FAM102B	284611	miRTarBase
hsa-let-7c	MI0000064	CRY2	1408	miRTarBase
hsa-miR-519c	MI0003148	RPRD2	23248	miRTarBase
hsa-miR-33b	MI0003646	POU2F1	5451	miRTarBase
hsa-let-7c	MI0000064	HNRNPU	3192	miRTarBase
hsa-let-7c	MI0000064	SUOX	6821	miRTarBase
hsa-let-7c	MI0000064	FBXL3	26224	miRTarBase
hsa-let-7c	MI0000064	NAA30	122830	miRTarBase
hsa-let-7c	MI0000064	MAPK6	5597	miRTarBase
hsa-miR-138	MI0000476	ARL6IP1	23204	miRTarBase
hsa-miR-519c	MI0003148	RBBP6	5930	miRTarBase
hsa-miR-100	MI0000102	CBFB	865	miRTarBase
hsa-miR-519c	MI0003148	ATMIN	23300	miRTarBase
hsa-miR-519c	MI0003148	TAOK1	57551	miRTarBase
hsa-miR-138	MI0000476	GNA13	10672	miRTarBase
hsa-miR-519c	MI0003148	STK11IP	114790	miRTarBase
hsa-let-7c	MI0000064	NCL	4691	miRTarBase
hsa-miR-519c	MI0003148	PPARA	5465	miRTarBase
hsa-miR-519c	MI0003148	RAB10	10890	miRTarBase
hsa-miR-33b	MI0003646	RMND5A	64795	miRTarBase
hsa-miR-519c	MI0003148	SKIL	6498	miRTarBase
hsa-let-7c	MI0000064	C5orf51	285636	miRTarBase
hsa-miR-33b	MI0003646	F2R	2149	miRTarBase
hsa-let-7c	MI0000064	CDKN1A	1026	miRTarBase
hsa-miR-519c	MI0003148	ATP6V1C1	528	miRTarBase
hsa-miR-519c	MI0003148	DPYSL2	1808	miRTarBase
hsa-let-7c	MI0000064	E2F5	1875	miRTarBase
hsa-miR-519c	MI0003148	NFIB	4781	miRTarBase
hsa-let-7c	MI0000064	RTL8A	26071	miRTarBase
hsa-miR-519c	MI0003148	PRRG4	79056	miRTarBase
hsa-miR-519c	MI0003148	ANKRD33B	651746	miRTarBase
hsa-let-7c	MI0000064	UBXN2B	137886	miRTarBase
hsa-miR-145	MI0000461	DDX6	1656	miRTarBase
hsa-let-7c	MI0000064	AMOTL1	154810	miRTarBase
hsa-miR-519c	MI0003148	HAS3	3038	miRTarBase
hsa-miR-519c	MI0003148	SALL3	27164	miRTarBase
hsa-miR-519c	MI0003148	FNBP1L	54874	miRTarBase
hsa-miR-519c	MI0003148	LCLAT1	253558	miRTarBase
hsa-miR-519c	MI0003148	PAK2	5062	miRTarBase
hsa-miR-519c	MI0003148	MAP1B	4131	miRTarBase
hsa-let-7c	MI0000064	EDN1	1906	miRTarBase
hsa-miR-519c	MI0003148	RABGAP1	23637	miRTarBase
hsa-miR-33b	MI0003646	WAC	51322	miRTarBase
hsa-miR-33b	MI0003646	ARID5B	84159	miRTarBase
hsa-miR-519c	MI0003148	TMEM109	79073	miRTarBase
hsa-miR-519c	MI0003148	TSKU	25987	miRTarBase
hsa-miR-33b	MI0003646	TSKU	25987	miRTarBase
hsa-let-7c	MI0000064	SALL3	27164	miRTarBase
hsa-let-7c	MI0000064	CDV3	55573	miRTarBase
hsa-let-7c	MI0000064	MAP7	9053	miRTarBase
hsa-let-7c	MI0000064	ID4	3400	miRTarBase
hsa-miR-145	MI0000461	HIST1H2AH	85235	miRTarBase
hsa-let-7c	MI0000064	STARD3NL	83930	miRTarBase
hsa-let-7c	MI0000064	PGRMC1	10857	miRTarBase
hsa-let-7c	MI0000064	TXLNG	55787	miRTarBase
hsa-let-7c	MI0000064	CLDN12	9069	miRTarBase
hsa-let-7c	MI0000064	USMG5	84833	miRTarBase
hsa-let-7c	MI0000064	BCCIP	56647	miRTarBase
hsa-let-7c	MI0000064	C11orf57	55216	miRTarBase
hsa-miR-33b	MI0003646	SLC16A1	6566	miRTarBase
hsa-miR-519c	MI0003148	FJX1	24147	miRTarBase
hsa-let-7c	MI0000064	PEX11B	8799	miRTarBase
hsa-let-7c	MI0000064	CHTOP	26097	miRTarBase
hsa-miR-519c	MI0003148	SLC25A44	9673	miRTarBase
hsa-let-7c	MI0000064	C1orf21	81563	miRTarBase
hsa-let-7c	MI0000064	TFDP1	7027	miRTarBase
hsa-miR-145	MI0000461	ARF6	382	miRTarBase
hsa-miR-33b	MI0003646	ABHD2	11057	miRTarBase
hsa-miR-519c	MI0003148	C16orf52	730094	miRTarBase
hsa-miR-100	MI0000102	DNAJA2	10294	miRTarBase
hsa-let-7c	MI0000064	MT2A	4502	miRTarBase
hsa-let-7c	MI0000064	PDP2	57546	miRTarBase
hsa-miR-138	MI0000476	NUFIP2	57532	miRTarBase
hsa-miR-519c	MI0003148	SOCS7	30837	miRTarBase
hsa-miR-519c	MI0003148	SOCS7	122809	miRTarBase
hsa-miR-138	MI0000476	CBX2	84733	miRTarBase
hsa-miR-519c	MI0003148	PVR	5817	miRTarBase
hsa-let-7c	MI0000064	ZNF264	9422	miRTarBase
hsa-miR-519c	MI0003148	ZNF317	57693	miRTarBase
hsa-miR-145	MI0000461	PLAGL2	5326	miRTarBase
hsa-let-7c	MI0000064	RRM2	6241	miRTarBase
hsa-let-7c	MI0000064	SLC20A1	6574	miRTarBase
hsa-let-7c	MI0000064	BZW1	9689	miRTarBase
hsa-let-7c	MI0000064	KREMEN1	83999	miRTarBase
hsa-let-7c	MI0000064	PTMA	5757	miRTarBase
hsa-miR-519c	MI0003148	CLIP4	79745	miRTarBase
hsa-miR-1251	MI0006386	CLIP4	79745	miRTarBase
hsa-let-7c	MI0000064	MXD1	4084	miRTarBase
hsa-miR-519c	MI0003148	NAGK	55577	miRTarBase
hsa-miR-1251	MI0006386	NCBP2	22916	miRTarBase
hsa-let-7c	MI0000064	NAT8L	339983	miRTarBase
hsa-let-7c	MI0000064	CREBRF	153222	miRTarBase
hsa-miR-145	MI0000461	ABRACL	58527	miRTarBase
hsa-miR-100	MI0000102	E2F3	1871	miRTarBase
hsa-let-7c	MI0000064	JAZF1	221895	miRTarBase
hsa-let-7c	MI0000064	PPP2R2A	5520	miRTarBase
hsa-let-7c	MI0000064	ACER2	340485	miRTarBase
hsa-let-7c	MI0000064	CALM2	805	miRTarBase
hsa-let-7c	MI0000064	TRA2B	6434	miRTarBase
hsa-miR-519c	MI0003148	GRPEL2	134266	miRTarBase
hsa-miR-519c	MI0003148	CDADC1	81602	miRTarBase
hsa-miR-100	MI0000102	ZFP3	124961	miRTarBase
hsa-miR-100	MI0000102	ZNF264	9422	miRTarBase
hsa-miR-519c	MI0003148	APH1A	51107	miRTarBase
hsa-miR-519c	MI0003148	POU2F1	5451	miRTarBase
hsa-miR-145	MI0000461	NR1D2	9975	miRTarBase
hsa-miR-519c	MI0003148	CASP2	835	miRTarBase
hsa-let-7c	MI0000064	ATP6V1F	9296	miRTarBase
hsa-miR-519c	MI0003148	CDC5L	988	miRTarBase
hsa-let-7c	MI0000064	MTOR	2475	miRTarBase
hsa-let-7c	MI0000064	RICTOR	253260	miRTarBase
hsa-miR-145	MI0000461	ADD3	120	miRTarBase
hsa-miR-100	MI0000102	FKBP5	2289	miRTarBase
hsa-miR-145	MI0000461	PADI1	29943	miRTarBase
hsa-miR-145	MI0000461	PHACTR2	9749	miRTarBase
hsa-miR-145	MI0000461	SNX24	28966	miRTarBase
hsa-miR-145	MI0000461	KIF21A	55605	miRTarBase
hsa-miR-145	MI0000461	SAMD5	389432	miRTarBase
hsa-miR-145	MI0000461	CRYBG1	202	miRTarBase
hsa-miR-100	MI0000102	GRHL1	29841	miRTarBase
hsa-miR-100	MI0000102	PPP1CB	5500	miRTarBase
hsa-let-7c	MI0000064	CEBPB	1051	miRTarBase
hsa-miR-145	MI0000461	HMGA2	8091	miRTarBase
hsa-miR-145	MI0000461	DDC	1644	miRTarBase
hsa-miR-100	MI0000102	ESR1	2099	miRTarBase
hsa-miR-145	MI0000461	ANGPT2	285	miRTarBase
hsa-let-7c	MI0000064	IL6	3569	miRTarBase
hsa-miR-100	MI0000102	CYR61	3491	miRTarBase
hsa-miR-145	MI0000461	ROCK1	6093	miRTarBase
hsa-miR-145	MI0000461	E2F3	1871	miRTarBase
hsa-miR-145	MI0000461	RPS6KB1	6198	miRTarBase
hsa-miR-145	MI0000461	CD28	940	miRTarBase
hsa-miR-145	MI0000461	NFATC1	4772	miRTarBase
hsa-let-7c	MI0000064	PBX2	5089	miRTarBase
hsa-let-7c	MI0000064	PBX2	5088	miRTarBase
hsa-let-7c	MI0000064	TNFRSF10B	8795	miRTarBase
hsa-miR-145	MI0000461	SP7	121340	miRTarBase
hsa-let-7c	MI0000064	TRIB2	28951	miRTarBase
hsa-miR-145	MI0000461	HDAC11	79885	miRTarBase
hsa-miR-100	MI0000102	RAP1B	5908	miRTarBase
hsa-miR-145	MI0000461	CFTR	1080	miRTarBase
hsa-let-7c	MI0000064	XBP1	7494	miRTarBase
hsa-let-7c	MI0000064	XBP1	7495	miRTarBase
hsa-let-7c	MI0000064	USF2	7392	miRTarBase
hsa-let-7c	MI0000064	TTF1	7270	miRTarBase
hsa-let-7c	MI0000064	STAT2	6773	miRTarBase
hsa-let-7c	MI0000064	SREBF1	6720	miRTarBase
hsa-let-7c	MI0000064	SMAD6	4091	miRTarBase
hsa-let-7c	MI0000064	SPDEF	25803	miRTarBase
hsa-let-7c	MI0000064	SETDB1	9869	miRTarBase
hsa-let-7c	MI0000064	RNF7	9616	miRTarBase
hsa-let-7c	MI0000064	RHOV	171177	miRTarBase
hsa-let-7c	MI0000064	RFX6	222546	miRTarBase
hsa-let-7c	MI0000064	RHOB	388	miRTarBase
hsa-let-7c	MI0000064	RARB	5915	miRTarBase
hsa-let-7c	MI0000064	PBX3	5090	miRTarBase
hsa-let-7c	MI0000064	OLFM4	10562	miRTarBase
hsa-let-7c	MI0000064	MYCL	4610	miRTarBase
hsa-let-7c	MI0000064	NRM	11270	miRTarBase
hsa-let-7c	MI0000064	MICB	4277	miRTarBase
hsa-let-7c	MI0000064	MAF1	84232	miRTarBase
hsa-let-7c	MI0000064	ID1	3397	miRTarBase
hsa-let-7c	MI0000064	HOXD1	3231	miRTarBase
hsa-let-7c	MI0000064	HSF1	3297	miRTarBase
hsa-let-7c	MI0000064	HHAT	55733	miRTarBase
hsa-let-7c	MI0000064	HES5	388585	miRTarBase
hsa-let-7c	MI0000064	EZH2	2146	miRTarBase
hsa-let-7c	MI0000064	ETNK2	55224	miRTarBase
hsa-let-7c	MI0000064	EN2	2020	miRTarBase
hsa-let-7c	MI0000064	DNMT1	1786	miRTarBase
hsa-let-7c	MI0000064	DLX4	1748	miRTarBase
hsa-let-7c	MI0000064	CRK	1398	miRTarBase
hsa-let-7c	MI0000064	CNNM2	54805	miRTarBase
hsa-let-7c	MI0000064	CREM	1390	miRTarBase
hsa-let-7c	MI0000064	BHLHB9	80823	miRTarBase
hsa-let-7c	MI0000064	ARID3A	1820	miRTarBase
hsa-miR-33b	MI0003646	ZNF75A	7627	miRTarBase
hsa-miR-519c	MI0003148	FAM9C	171484	miRTarBase
hsa-miR-100	MI0000102	ABCB5	340273	miRTarBase
hsa-miR-519c	MI0003148	KDM5A	5927	miRTarBase
hsa-miR-138	MI0000476	TMBIM4	51643	miRTarBase
hsa-miR-519c	MI0003148	TMEM245	23731	miRTarBase
hsa-miR-1251	MI0006386	C1orf109	54955	miRTarBase
hsa-miR-519c	MI0003148	NDUFV3	4731	miRTarBase
hsa-let-7c	MI0000064	NDUFA4P1	360165	miRTarBase
hsa-miR-519c	MI0003148	TRPV2	51393	miRTarBase
hsa-miR-138	MI0000476	IGFBP4	3487	miRTarBase
hsa-miR-33b	MI0003646	COX15	1355	miRTarBase
hsa-miR-1251	MI0006386	UBE4B	10277	miRTarBase
hsa-miR-519c	MI0003148	HPS4	89781	miRTarBase
hsa-miR-33b	MI0003646	CHML	1122	miRTarBase
hsa-miR-33b	MI0003646	ZNF583	147949	miRTarBase
hsa-miR-145	MI0000461	CSRNP3	80034	miRTarBase
hsa-miR-33b	MI0003646	EVX2	344191	miRTarBase
hsa-miR-33b	MI0003646	PPIC	5480	miRTarBase
hsa-miR-1251	MI0006386	ZNF91	7644	miRTarBase
hsa-miR-33b	MI0003646	FLT1	2321	miRTarBase
hsa-miR-100	MI0000102	NUDT3	11165	miRTarBase
hsa-miR-100	MI0000102	GREM1	26585	miRTarBase
hsa-miR-100	MI0000102	CEPT1	10390	miRTarBase
hsa-miR-100	MI0000102	ZNF701	55762	miRTarBase
hsa-miR-100	MI0000102	TIMM8B	26521	miRTarBase
hsa-miR-100	MI0000102	CNBP	7555	miRTarBase
hsa-miR-100	MI0000102	ZNF525	170958	miRTarBase
hsa-miR-100	MI0000102	CNIH4	29097	miRTarBase
hsa-miR-100	MI0000102	EIF2A	83939	miRTarBase
hsa-miR-100	MI0000102	PHKB	5257	miRTarBase
hsa-miR-145	MI0000461	TRA2B	6434	miRTarBase
hsa-miR-100	MI0000102	CASTOR2	729438	miRTarBase
hsa-miR-100	MI0000102	CMSS1	84319	miRTarBase
hsa-miR-100	MI0000102	TMC7	79905	miRTarBase
hsa-miR-100	MI0000102	NAPEPLD	222236	miRTarBase
hsa-miR-100	MI0000102	TMEM251	26175	miRTarBase
hsa-miR-100	MI0000102	LRRC57	255252	miRTarBase
hsa-miR-145	MI0000461	NTRK2	4915	miRTarBase
hsa-miR-100	MI0000102	C16orf87	388272	miRTarBase
hsa-miR-138	MI0000476	IKBIP	121457	miRTarBase
hsa-miR-100	MI0000102	SEMA5A	9037	miRTarBase
hsa-miR-100	MI0000102	KATNAL1	84056	miRTarBase
hsa-miR-519c	MI0003148	FOXO1	2308	miRTarBase
hsa-miR-1251	MI0006386	FOXO1	2308	miRTarBase
hsa-miR-100	MI0000102	TPT1	7178	miRTarBase
hsa-miR-100	MI0000102	TRIM13	10206	miRTarBase
hsa-miR-145	MI0000461	TBC1D8	11138	miRTarBase
hsa-miR-100	MI0000102	NPY4R	5540	miRTarBase
hsa-let-7c	MI0000064	ATP6V1G1	9550	miRTarBase
hsa-miR-1251	MI0006386	AGO1	26523	miRTarBase
hsa-miR-100	MI0000102	AGO1	26523	miRTarBase
hsa-miR-100	MI0000102	SRSF11	9295	miRTarBase
hsa-miR-100	MI0000102	ENTPD7	57089	miRTarBase
hsa-miR-33b	MI0003646	GM2A	2760	miRTarBase
hsa-miR-100	MI0000102	STX16	8675	miRTarBase
hsa-miR-100	MI0000102	THYN1	29087	miRTarBase
hsa-miR-145	MI0000461	ZSCAN16	80345	miRTarBase
hsa-miR-100	MI0000102	TASP1	55617	miRTarBase
hsa-miR-519c	MI0003148	C5orf30	90355	miRTarBase
hsa-miR-100	MI0000102	SRSF7	6432	miRTarBase
hsa-miR-100	MI0000102	SLFN5	162394	miRTarBase
hsa-let-7c	MI0000064	KIF27	55582	miRTarBase
hsa-miR-100	MI0000102	CDCP1	64866	miRTarBase
hsa-miR-100	MI0000102	STOM	2040	miRTarBase
hsa-miR-100	MI0000102	FAM161B	145483	miRTarBase
hsa-miR-100	MI0000102	NUP205	23165	miRTarBase
hsa-miR-100	MI0000102	OSMR	9180	miRTarBase
hsa-miR-100	MI0000102	MRPL3	11222	miRTarBase
hsa-miR-100	MI0000102	ASPA	443	miRTarBase
hsa-miR-100	MI0000102	ERP44	23071	miRTarBase
hsa-miR-100	MI0000102	EMX1	2016	miRTarBase
hsa-miR-100	MI0000102	RRP8	23378	miRTarBase
hsa-miR-100	MI0000102	ARFGEF3	57221	miRTarBase
hsa-miR-100	MI0000102	STRIP2	57464	miRTarBase
hsa-miR-100	MI0000102	PACSIN1	29993	miRTarBase
hsa-miR-100	MI0000102	DUSP4	1846	miRTarBase
hsa-miR-1251	MI0006386	HS3ST1	9957	miRTarBase
hsa-let-7c	MI0000064	ZNF774	342132	miRTarBase
hsa-miR-519c	MI0003148	WNK3	65267	miRTarBase
hsa-let-7c	MI0000064	SMC3	9126	miRTarBase
hsa-miR-138	MI0000476	PCP4L1	654790	miRTarBase
hsa-miR-100	MI0000102	GABRB1	2560	miRTarBase
hsa-miR-100	MI0000102	CKS1B	1163	miRTarBase
hsa-let-7c	MI0000064	ANKRD46	157567	miRTarBase
hsa-miR-100	MI0000102	CREBRF	153222	miRTarBase
hsa-miR-100	MI0000102	ZNHIT3	9326	miRTarBase
hsa-miR-100	MI0000102	ACTBL2	345651	miRTarBase
hsa-miR-1251	MI0006386	CC2D1B	200014	miRTarBase
hsa-miR-100	MI0000102	SOX3	6658	miRTarBase
hsa-miR-100	MI0000102	POU2F1	5451	miRTarBase
hsa-miR-100	MI0000102	PRAMEF7	441871	miRTarBase
hsa-miR-100	MI0000102	PRAMEF8	391002	miRTarBase
hsa-miR-100	MI0000102	BCL2L13	23786	miRTarBase
hsa-miR-100	MI0000102	POFUT2	23275	miRTarBase
hsa-let-7c	MI0000064	FMNL3	91010	miRTarBase
hsa-miR-100	MI0000102	SYT9	143425	miRTarBase
hsa-miR-100	MI0000102	ZHX3	23051	miRTarBase
hsa-miR-33b	MI0003646	LMBRD2	92255	miRTarBase
hsa-miR-100	MI0000102	TENM4	26011	miRTarBase
hsa-miR-100	MI0000102	PAX8	7849	miRTarBase
hsa-miR-100	MI0000102	NECTIN3	25945	miRTarBase
hsa-let-7c	MI0000064	C19orf53	28974	miRTarBase
hsa-miR-615	MI0003628	HSD11B1L	374875	miRTarBase
hsa-let-7c	MI0000064	MEIS3P1	4213	miRTarBase
hsa-let-7c	MI0000064	C1RL	51279	miRTarBase
hsa-let-7c	MI0000064	CES3	23491	miRTarBase
hsa-let-7c	MI0000064	NUCB2	4925	miRTarBase
hsa-let-7c	MI0000064	QDPR	5860	miRTarBase
hsa-let-7c	MI0000064	DISC1	27185	miRTarBase
hsa-miR-33b	MI0003646	CNOT4	4850	miRTarBase
hsa-let-7c	MI0000064	RHD	6007	miRTarBase
hsa-miR-1251	MI0006386	ZNF557	79230	miRTarBase
hsa-miR-615	MI0003628	COMMD5	28991	miRTarBase
hsa-miR-1251	MI0006386	ADA2	51816	miRTarBase
hsa-let-7c	MI0000064	HIST1H2BK	85236	miRTarBase
hsa-let-7c	MI0000064	FXN	2395	miRTarBase
hsa-let-7c	MI0000064	RABL2A	11159	miRTarBase
hsa-miR-1251	MI0006386	WARS	7453	miRTarBase
hsa-let-7c	MI0000064	ACOT9	23597	miRTarBase
hsa-miR-615	MI0003628	TBC1D25	4943	miRTarBase
hsa-miR-145	MI0000461	GNL1	2794	miRTarBase
hsa-miR-615	MI0003628	PLEKHM2	23207	miRTarBase
hsa-miR-145	MI0000461	AAED1	195827	miRTarBase
hsa-let-7c	MI0000064	GLO1	2739	miRTarBase
hsa-miR-1251	MI0006386	KIF2C	11004	miRTarBase
hsa-let-7c	MI0000064	RABL2B	11158	miRTarBase
hsa-let-7c	MI0000064	ZNF587	84914	miRTarBase
hsa-let-7c	MI0000064	THEM6	51337	miRTarBase
hsa-let-7c	MI0000064	MRPL12	6182	miRTarBase
hsa-let-7c	MI0000064	MRPS21	54460	miRTarBase
hsa-miR-1251	MI0006386	HAVCR2	84868	miRTarBase
hsa-let-7c	MI0000064	RRM1	6240	miRTarBase
hsa-let-7c	MI0000064	NOM1	64434	miRTarBase
hsa-let-7c	MI0000064	FAM105A	54491	miRTarBase
hsa-miR-615	MI0003628	UBE2S	27338	miRTarBase
hsa-let-7c	MI0000064	NOA1	84273	miRTarBase
hsa-miR-615	MI0003628	SDF4	51150	miRTarBase
hsa-let-7c	MI0000064	OPA3	80207	miRTarBase
hsa-let-7c	MI0000064	SLC11A2	4891	miRTarBase
hsa-let-7c	MI0000064	COL8A1	1295	miRTarBase
hsa-miR-145	MI0000461	ZNF426	79088	miRTarBase
hsa-miR-615	MI0003628	ZNF426	79088	miRTarBase
hsa-miR-519c	MI0003148	MPDU1	9526	miRTarBase
hsa-let-7c	MI0000064	YAE1D1	57002	miRTarBase
hsa-let-7c	MI0000064	ZNF8	7554	miRTarBase
hsa-miR-519c	MI0003148	NTN1	9423	miRTarBase
hsa-miR-145	MI0000461	UBR7	55148	miRTarBase
hsa-let-7c	MI0000064	ZC3HAV1L	92092	miRTarBase
hsa-miR-519c	MI0003148	ZBTB34	403341	miRTarBase
hsa-let-7c	MI0000064	YWHAZ	7534	miRTarBase
hsa-miR-33b	MI0003646	YWHAG	7532	miRTarBase
hsa-let-7c	MI0000064	VPS36	51028	miRTarBase
hsa-let-7c	MI0000064	VCL	7414	miRTarBase
hsa-miR-519c	MI0003148	UBTF	7343	miRTarBase
hsa-miR-1251	MI0006386	UBE2B	7320	miRTarBase
hsa-miR-519c	MI0003148	RPS27A	6233	miRTarBase
hsa-let-7c	MI0000064	TSC22D2	9819	miRTarBase
hsa-miR-519c	MI0003148	TRIP10	9322	miRTarBase
hsa-let-7c	MI0000064	TMED5	50999	miRTarBase
hsa-miR-519c	MI0003148	TFAM	7019	miRTarBase
hsa-miR-138	MI0000476	TAOK1	57551	miRTarBase
hsa-let-7c	MI0000064	SYNJ2BP	55333	miRTarBase
hsa-miR-519c	MI0003148	STX6	10228	miRTarBase
hsa-miR-519c	MI0003148	SPTY2D1	144108	miRTarBase
hsa-miR-145	MI0000461	SNTB1	6641	miRTarBase
hsa-miR-1251	MI0006386	SLC7A1	6541	miRTarBase
hsa-miR-519c	MI0003148	SGMS1	259230	miRTarBase
hsa-miR-145	MI0000461	SESN2	83667	miRTarBase
hsa-let-7c	MI0000064	RNF144B	255488	miRTarBase
hsa-miR-145	MI0000461	REL	5966	miRTarBase
hsa-let-7c	MI0000064	RAB40C	57799	miRTarBase
hsa-miR-519c	MI0003148	PXK	54899	miRTarBase
hsa-miR-145	MI0000461	PSAT1	29968	miRTarBase
hsa-let-7c	MI0000064	PPP1R15B	84919	miRTarBase
hsa-let-7c	MI0000064	POLR2D	5433	miRTarBase
hsa-let-7c	MI0000064	PLXND1	23129	miRTarBase
hsa-let-7c	MI0000064	PGM2L1	283209	miRTarBase
hsa-let-7c	MI0000064	PCGF3	10336	miRTarBase
hsa-miR-519c	MI0003148	PAQR5	54852	miRTarBase
hsa-let-7c	MI0000064	NR6A1	2649	miRTarBase
hsa-miR-519c	MI0003148	NR1D2	9975	miRTarBase
hsa-miR-519c	MI0003148	NIN	51199	miRTarBase
hsa-miR-519c	MI0003148	NETO2	81831	miRTarBase
hsa-miR-615	MI0003628	NACC1	112939	miRTarBase
hsa-let-7c	MI0000064	NAA20	51126	miRTarBase
hsa-let-7c	MI0000064	MTUS1	57509	miRTarBase
hsa-let-7c	MI0000064	MLLT10	8028	miRTarBase
hsa-miR-519c	MI0003148	MLLT1	4298	miRTarBase
hsa-let-7c	MI0000064	MIEF1	54471	miRTarBase
hsa-miR-519c	MI0003148	MARK2	2011	miRTarBase
hsa-miR-519c	MI0003148	MAPKBP1	23005	miRTarBase
hsa-miR-615	MI0003628	MAP3K9	4293	miRTarBase
hsa-let-7c	MI0000064	MAP3K2	10746	miRTarBase
hsa-miR-519c	MI0003148	MAP3K2	10746	miRTarBase
hsa-let-7c	MI0000064	MAP2K7	5609	miRTarBase
hsa-let-7c	MI0000064	LYN	4067	miRTarBase
hsa-let-7c	MI0000064	LRRC20	55222	miRTarBase
hsa-miR-519c	MI0003148	KLHL28	54813	miRTarBase
hsa-let-7c	MI0000064	KLHDC8B	200942	miRTarBase
hsa-miR-519c	MI0003148	KIF13A	63971	miRTarBase
hsa-let-7c	MI0000064	KIAA0930	23313	miRTarBase
hsa-let-7c	MI0000064	KCTD21	283219	miRTarBase
hsa-miR-519c	MI0003148	KCTD10	83892	miRTarBase
hsa-miR-615	MI0003628	IP6K1	9807	miRTarBase
hsa-let-7c	MI0000064	IFNLR1	163702	miRTarBase
hsa-let-7c	MI0000064	ICOSLG	23308	miRTarBase
hsa-miR-519c	MI0003148	HSPA8	3312	miRTarBase
hsa-let-7c	MI0000064	HERPUD1	9709	miRTarBase
hsa-let-7c	MI0000064	HAT1	8520	miRTarBase
hsa-miR-519c	MI0003148	GPR157	80045	miRTarBase
hsa-miR-519c	MI0003148	GNS	2799	miRTarBase
hsa-let-7c	MI0000064	GABPB1	2553	miRTarBase
hsa-let-7c	MI0000064	GABPB1	8327	miRTarBase
hsa-miR-615	MI0003628	G3BP1	10146	miRTarBase
hsa-miR-145	MI0000461	FZD6	8323	miRTarBase
hsa-let-7c	MI0000064	FIGN	55137	miRTarBase
hsa-let-7c	MI0000064	FHL2	2274	miRTarBase
hsa-miR-138	MI0000476	FEM1B	10116	miRTarBase
hsa-let-7c	MI0000064	FAM83G	644815	miRTarBase
hsa-miR-519c	MI0003148	F3	2152	miRTarBase
hsa-let-7c	MI0000064	EIF4G2	1982	miRTarBase
hsa-let-7c	MI0000064	EFHD2	79180	miRTarBase
hsa-miR-519c	MI0003148	DLG5	9231	miRTarBase
hsa-miR-519c	MI0003148	CSNK1A1	1452	miRTarBase
hsa-miR-519c	MI0003148	CNOT6L	246175	miRTarBase
hsa-let-7c	MI0000064	CKS2	1164	miRTarBase
hsa-miR-33b	MI0003646	CDKN1B	1027	miRTarBase
hsa-miR-145	MI0000461	CDC5L	988	miRTarBase
hsa-let-7c	MI0000064	CCND1	595	miRTarBase
hsa-miR-145	MI0000461	CCND1	595	miRTarBase
hsa-miR-519c	MI0003148	CAPRIN2	65981	miRTarBase
hsa-miR-519c	MI0003148	EMSY	56946	miRTarBase
hsa-miR-519c	MI0003148	BLCAP	10904	miRTarBase
hsa-miR-519c	MI0003148	BBX	56987	miRTarBase
hsa-let-7c	MI0000064	ATXN7L3B	552889	miRTarBase
hsa-let-7c	MI0000064	ATXN7L3	56970	miRTarBase
hsa-miR-519c	MI0003148	ATL3	25923	miRTarBase
hsa-let-7c	MI0000064	ATG9A	79065	miRTarBase
hsa-let-7c	MI0000064	ATG12	9140	miRTarBase
hsa-miR-519c	MI0003148	ARHGAP1	392	miRTarBase
hsa-let-7c	MI0000064	AREL1	9870	miRTarBase
hsa-let-7c	MI0000064	AP1S1	1174	miRTarBase
hsa-miR-519c	MI0003148	ANKRD50	57182	miRTarBase
hsa-let-7c	MI0000064	AHR	196	miRTarBase
hsa-let-7c	MI0000064	AHCYL2	23382	miRTarBase
hsa-miR-519c	MI0003148	ADAR	103	miRTarBase
hsa-miR-615	MI0003628	KCNH1	3756	miRTarBase
hsa-miR-1251	MI0006386	POLD3	10714	miRTarBase
hsa-miR-1251	MI0006386	ZNFX1	57169	miRTarBase
hsa-miR-519c	MI0003148	ZNF652	22834	miRTarBase
hsa-miR-145	MI0000461	VGLL4	9686	miRTarBase
hsa-miR-33b	MI0003646	SLC30A1	7779	miRTarBase
hsa-miR-519c	MI0003148	SLC30A1	7779	miRTarBase
hsa-let-7c	MI0000064	PLAGL2	5326	miRTarBase
hsa-miR-145	MI0000461	IVNS1ABP	10625	miRTarBase
hsa-miR-519c	MI0003148	FOXQ1	94234	miRTarBase
hsa-miR-519c	MI0003148	FBXL5	26234	miRTarBase
hsa-let-7c	MI0000064	TACC2	10579	miRTarBase
hsa-miR-1251	MI0006386	DCTN4	51164	miRTarBase
hsa-let-7c	MI0000064	ZNF28	7576	miRTarBase
hsa-miR-519c	MI0003148	CNOT4	4850	miRTarBase
hsa-let-7c	MI0000064	TUBB2A	7280	miRTarBase
hsa-miR-519c	MI0003148	ZDHHC20	253832	miRTarBase
hsa-let-7c	MI0000064	SHMT1	6470	miRTarBase
hsa-miR-519c	MI0003148	MPLKIP	136647	miRTarBase
hsa-miR-519c	MI0003148	TERF2IP	54386	miRTarBase
hsa-miR-1251	MI0006386	TERF2IP	54386	miRTarBase
hsa-miR-33b	MI0003646	THY1	7070	miRTarBase
hsa-miR-615	MI0003628	GZMM	3004	miRTarBase
hsa-miR-615	MI0003628	CPNE5	57699	miRTarBase
hsa-miR-519c	MI0003148	PDRG1	81572	miRTarBase
hsa-let-7c	MI0000064	ZBTB5	9925	miRTarBase
hsa-miR-519c	MI0003148	TSG101	7251	miRTarBase
hsa-let-7c	MI0000064	SOCS1	8651	miRTarBase
hsa-miR-519c	MI0003148	SEMA7A	8482	miRTarBase
hsa-miR-33b	MI0003646	SEMA7A	8482	miRTarBase
hsa-let-7c	MI0000064	PMAIP1	5366	miRTarBase
[truncated: 36,017 more rows]

## Sheet: S2. miRDB GO function
ID	Description	GeneRatio	BgRatio	pvalue	p.adjust	qvalue	geneID	Count
GO:0010975	regulation of neuron projection development	149/3204	478/18493	4.70711e-14	2.94571e-10	2.3491e-10	23394/4208/2185/23327/9314/1400/23613/10371/23426/7504/2042/9353/124925/2033/50807/8321/10059/29993/53335/27020/9693/7101/134430/9839/81545/6498/9699/10090/57154/26039/57520/4734/54664/10512/112/102/9448/57643/10505/22902/440730/5396/4803/5597/54910/8322/6405/23129/9860/10154/4067/26037/7804/2332/55754/2475/27/2534/27124/22849/22906/64764/162427/55714/57118/29904/84079/57498/54700/5587/51517/6324…	149
GO:0045666	positive regulation of neuron differentiation	115/3204	356/18493	2.931e-12	9.17109e-09	7.31361e-09	23394/4208/2185/5915/23327/23613/23426/2042/9353/2033/8321/9043/10059/29993/50937/604/27020/22943/9693/9839/81545/4760/6498/9699/23081/57154/26039/4762/54664/2736/429/22902/440730/392255/4803/5597/8322/23129/10154/4067/596/7804/2332/55754/2475/27/2534/1453/22849/22906/64764/2119/162427/55714/57118/29904/84079/57498/54700/1789/5587/51517/6324/8648/7224/57698/8507/9175/1742/151/116/23373/7225/2043/…	115
GO:0031346	positive regulation of cell projection organization	117/3204	371/18493	1.10481e-11	1.57388e-08	1.25511e-08	23394/8874/2185/23327/79647/3673/23613/26053/23426/2042/9353/2033/8321/10059/29993/2823/27020/9693/9839/25940/81545/6498/89795/9699/989/57154/26039/51762/54664/3064/7046/1236/22902/79734/440730/4803/5597/153241/8322/9662/23129/10154/4067/7804/2332/55754/2475/27/2534/6239/22849/22906/49856/64764/162427/55714/57118/29904/84079/57498/54700/5587/54874/51517/3815/6324/57451/55704/7224/57698/10178/8507…	117
GO:0002009	morphogenesis of an epithelium	142/3204	479/18493	1.22969e-11	1.57388e-08	1.25511e-08	23513/4208/8626/3212/3516/5241/6495/25932/6256/9314/84678/10890/10371/90627/2668/115908/55366/163/55727/1173/9353/3091/8321/27086/3217/1601/22943/6659/9839/342184/51684/79977/186/57154/3845/8092/2637/4070/10512/6497/2294/8289/780/84133/2736/4041/30812/6943/2252/4040/10253/57534/9421/7976/340419/5087/1906/80144/85407/27031/54910/23122/8322/131405/157506/23129/441478/596/166336/3400/2475/7855/6239/…	142
GO:0050769	positive regulation of neurogenesis	136/3204	453/18493	1.25749e-11	1.57388e-08	1.25511e-08	23394/4208/2185/5915/23327/25836/23613/10371/23426/2042/23405/9353/3091/2033/8321/9043/10059/29993/50937/604/27020/22943/9693/9839/81545/4760/6498/5270/9699/23081/57154/26039/4762/7852/54664/23060/2736/30812/429/7976/22902/440730/392255/4803/5597/8322/4673/23129/10154/4067/596/7804/2332/55754/2475/5080/27/2534/1453/22849/22906/64764/2119/162427/55714/57118/29904/84079/57498/54700/1789/5587/51517/…	136
GO:0016358	dendrite development	78/3204	218/18493	4.0473e-11	4.22133e-08	3.36636e-08	4208/23327/23613/10371/23426/124925/50807/10059/29993/53335/9693/7101/26039/57520/4734/54664/102/116443/4891/5597/26037/7804/2332/2475/2534/22849/2182/4204/22906/57118/29904/84079/57498/7224/23769/1141/10160/55236/114788/1742/23380/23271/8301/23373/7225/2043/84298/22903/4076/5911/7533/57468/8997/26050/79791/65981/7436/55607/9231/4131/5728/22941/8976/26259/10611/577/4205/1902/50488/1952/85358/2146…	78
GO:0022604	regulation of cell morphogenesis	136/3204	474/18493	3.88255e-10	3.13611e-07	2.50094e-07	23394/2244/10979/8874/2185/23327/10371/23426/7504/91010/9353/10059/53335/9693/7101/134430/9839/5962/6498/9699/989/10090/57154/26039/57520/4734/4070/10512/56990/6347/55023/102/10562/254065/57643/10505/22902/4803/55785/54910/8322/6405/23129/10154/6354/26037/7804/2332/30011/55435/2534/6239/7750/960/22906/22836/29904/84079/81/2243/114793/3815/6678/11149/7224/832/57698/1141/1399/85464/55604/9175/1742/…	136
GO:0048568	embryonic organ development	124/3204	422/18493	4.58959e-10	3.13611e-07	2.50094e-07	23513/4208/3212/3516/5915/6495/25836/84678/1028/2668/115908/5930/6886/639/3091/26018/3217/2186/10370/2778/6434/430/7545/4760/51684/79977/2020/8320/4762/860/8092/2637/2294/8289/79728/2736/79955/57453/6943/4040/10253/57534/9421/7976/5087/7046/1906/4188/5396/121227/27031/8932/157506/1290/7855/5080/29/2487/23314/56034/7942/26146/3815/51804/54583/4647/8648/7849/10818/4323/55036/4088/4325/200894/7048/8…	124
GO:0061564	axon development	140/3204	493/18493	4.61793e-10	3.13611e-07	2.50094e-07	23394/10048/139065/10752/288/2044/9314/1400/10890/26053/10371/7504/2668/2042/9353/836/1009/27020/7101/134430/9839/6498/2887/10090/7852/23768/2637/10512/7155/780/26999/2736/57453/7976/57643/4009/10505/22902/9846/8660/4803/54910/6405/11041/23129/9860/10154/596/26037/2675/1385/30011/5080/2534/65059/5818/22906/5781/3800/323/2674/3730/104/22865/6324/214/8428/10818/7224/57698/4692/1141/4929/84189/85464…	140
GO:0007409	axonogenesis	130/3204	449/18493	5.01137e-10	3.13611e-07	2.50094e-07	23394/10048/139065/10752/288/2044/1400/10890/26053/10371/7504/2668/9353/1009/27020/7101/134430/9839/6498/2887/10090/7852/23768/2637/10512/7155/26999/2736/57453/7976/57643/4009/10505/22902/9846/8660/4803/54910/6405/11041/23129/10154/596/26037/2675/1385/30011/5080/2534/65059/5818/22906/5781/3800/323/2674/3730/104/22865/6324/214/10818/7224/57698/4692/1141/4929/84189/85464/9175/3996/9378/8301/57688/5…	130
GO:0031331	positive regulation of cellular catabolic process	106/3204	347/18493	7.87939e-10	4.48266e-07	3.57475e-07	5563/2185/8312/23677/10558/2729/29883/11236/9532/6613/3091/253943/55147/1601/5601/122809/94241/5962/154/5347/246175/9337/23411/57154/9817/5208/9567/3064/9698/1634/23530/92140/1612/140775/440730/8660/25782/5899/131405/7133/26263/258010/2332/151636/9655/10140/9978/255738/28951/27161/1453/10346/22849/22930/7942/55294/10236/5587/678/3099/4193/3356/5049/664/5027/9517/51441/3667/3320/340719/9709/13/688…	106
GO:0010976	positive regulation of neuron projection development	87/3204	269/18493	1.20758e-09	6.29755e-07	5.02207e-07	23394/2185/23327/23613/23426/2042/9353/2033/8321/10059/29993/27020/9693/9839/81545/6498/9699/57154/26039/54664/22902/440730/4803/5597/8322/23129/10154/4067/7804/2332/55754/2475/27/2534/22849/22906/64764/162427/55714/57118/29904/84079/57498/54700/5587/51517/6324/7224/57698/8507/9175/1742/116/23373/2043/84298/9863/4076/6387/6857/8482/1272/8997/7336/79791/65981/7436/55607/9231/4131/3984/22941/26259/…	87
GO:0009896	positive regulation of catabolic process	119/3204	407/18493	1.42792e-09	6.60924e-07	5.27062e-07	5563/2185/23327/8312/23677/10558/2729/29883/11236/9532/6613/3091/253943/55147/1601/5601/122809/94241/5962/5581/154/5347/246175/9337/23411/57154/25976/57520/4734/9817/5208/9567/3064/9698/9870/1634/23163/23530/92140/1612/140775/440730/85407/8660/25782/5899/131405/7133/26263/258010/2332/151636/9655/10140/9978/255738/28951/27161/1453/10346/22849/22930/7942/55294/10236/2719/5587/678/3099/4193/3356/504…	119
GO:0016570	histone modification	130/3204	456/18493	1.47858e-09	6.60924e-07	5.27062e-07	8295/1107/5563/2070/57708/10933/23476/5929/7786/4221/2122/25836/84678/23613/26053/5926/3720/51366/4591/23512/79960/51742/79718/25942/2033/5253/123169/6314/604/55870/10891/26038/6018/23338/221037/80314/23081/57673/23411/171023/7443/55677/6497/80335/6877/9329/7994/5599/51200/5977/200424/10336/51616/56254/56916/8085/1108/8091/2641/79577/23304/2332/151636/11176/3662/284058/10765/4204/11240/7799/84193…	130
GO:0016569	covalent chromatin modification	133/3204	470/18493	1.61117e-09	6.7218e-07	5.36039e-07	8295/1107/5563/2070/57708/10933/23476/5929/7786/4221/2122/25836/84678/23613/26053/5926/57379/3720/51366/4591/23512/79960/51742/79718/25942/2033/5253/123169/6314/604/55870/10891/26038/6018/23338/221037/80314/23081/57673/23411/171023/7443/55677/6497/80335/6877/9329/7994/5599/51200/5977/200424/10336/51616/56254/56916/8932/8085/1108/8091/2641/79577/23304/2332/151636/11176/3662/284058/4152/10765/4204/…	133
GO:0016055	Wnt signaling pathway	130/3204	463/18493	4.17956e-09	1.63473e-06	1.30364e-06	55182/5563/10979/3516/8312/1654/8452/9314/115908/84445/1456/23291/55366/163/4286/51366/6934/1173/10009/5515/10042/79960/79718/5494/9096/8321/6657/123169/55031/80319/1601/22943/6659/9839/154810/2887/57154/5534/6497/51701/84133/4041/51444/4040/7976/340419/205147/4188/85407/27031/8322/8932/441478/79577/85458/166336/865/10927/9978/8325/27161/7855/2309/1453/169200/2487/26585/55789/2719/10146/27123/230…	130
GO:0010769	regulation of cell morphogenesis involved in differentiation	91/3204	293/18493	4.98327e-09	1.83443e-06	1.46289e-06	23394/2244/8874/23327/10371/7504/9353/10059/9693/7101/134430/9839/6498/10090/26039/57520/4734/4070/10512/102/10562/57643/10505/22902/4803/54910/6405/23129/10154/26037/7804/2332/55435/6239/22906/29904/84079/81/2243/7224/57698/1141/1399/85464/55604/9175/57688/57556/7225/2043/2045/57142/1398/4076/6387/5911/7533/8482/8997/10439/79791/65981/55607/10509/1808/4131/5728/3037/3984/26259/4897/11078/10611/5…	91
GO:0198738	cell-cell signaling by wnt	130/3204	465/18493	5.58146e-09	1.94049e-06	1.54747e-06	55182/5563/10979/3516/8312/1654/8452/9314/115908/84445/1456/23291/55366/163/4286/51366/6934/1173/10009/5515/10042/79960/79718/5494/9096/8321/6657/123169/55031/80319/1601/22943/6659/9839/154810/2887/57154/5534/6497/51701/84133/4041/51444/4040/7976/340419/205147/4188/85407/27031/8322/8932/441478/79577/85458/166336/865/10927/9978/8325/27161/7855/2309/1453/169200/2487/26585/55789/2719/10146/27123/230…	130
GO:0051056	regulation of small GTPase mediated signal transduction	97/3204	321/18493	7.57514e-09	2.49501e-06	1.98968e-06	117178/8874/9901/8452/26053/90627/9411/154796/9353/26084/50937/11214/604/5962/343578/3845/8036/10982/56990/9824/57568/10564/10253/22899/55200/9448/84952/10125/440730/1281/4803/79822/55785/54848/26037/83478/23362/57221/26269/4952/9459/10144/29/9743/394/221178/55789/440107/8473/116984/10160/10276/51196/395/23380/9750/9909/613/5921/23616/55114/57522/57514/23365/10617/1398/23263/137735/19/8997/84144/…	97
GO:0071383	cellular response to steroid hormone stimulus	82/3204	259/18493	1.07556e-08	3.36542e-06	2.6838e-06	8626/2908/5915/8312/5241/6256/6095/9063/23426/4864/51366/2033/27086/23054/11214/1601/161582/7101/29079/10891/3192/29966/186/23411/4734/9969/8204/8289/687/51341/6943/1408/1906/2649/8085/2100/6502/865/7332/2309/81606/11240/4306/9975/1789/6781/678/490/55818/8648/6198/4929/79039/51569/116/9575/8725/477/11057/7533/2099/9572/9282/1655/7337/5925/142/7067/6096/677/2322/9101/5536/2101/5467/7068/133522/197…	82
GO:0050773	regulation of dendrite development	52/3204	139/18493	1.23455e-08	3.67897e-06	2.93384e-06	4208/23327/23613/124925/50807/10059/29993/53335/9693/7101/26039/57520/4734/54664/102/5597/26037/7804/2332/2475/22849/57118/29904/84079/7224/1141/114788/23271/23373/7225/2043/84298/4076/5911/7533/8997/79791/65981/7436/55607/9231/5728/22941/26259/10611/577/1902/85358/2146/5649/26012/9762	52
GO:0048813	dendrite morphogenesis	51/3204	136/18493	1.54781e-08	4.36819e-06	3.48347e-06	23327/10371/10059/9693/7101/26039/57520/4734/54664/102/4891/26037/7804/2332/2534/22906/29904/84079/57498/7224/1141/10160/1742/8301/7225/2043/22903/4076/5911/7533/8997/26050/79791/65981/7436/55607/5728/22941/8976/26259/10611/577/4205/50488/1952/85358/5649/26012/815/4038/9762	51
GO:0048863	stem cell differentiation	67/3204	199/18493	1.60544e-08	4.36819e-06	3.48347e-06	55553/4208/8626/3516/10371/2668/8621/3720/6886/4054/54517/3091/8321/2823/9839/3192/11051/23081/4072/8320/860/8092/2637/4070/10512/5788/51755/30812/429/9698/4040/10505/1906/54910/157506/6405/8091/865/84541/81606/2487/26585/2066/3815/678/55818/51441/57556/4005/93649/23528/8482/5156/2099/6774/8828/90/5594/10509/54940/2625/124540/7161/22823/309/2296/8929	67
GO:0030900	forebrain development	108/3204	374/18493	1.70041e-08	4.43383e-06	3.53582e-06	54407/3516/5915/2044/84678/3747/10371/63974/9353/3091/6657/50937/836/22943/9693/6434/7101/9839/4760/10891/26038/493/8320/3845/2637/7155/6497/23657/8289/55970/3799/2736/429/23353/6867/4040/93986/4009/10642/1281/153241/8646/7804/26468/3746/1385/85458/3400/5080/2534/552/23314/66000/22930/2066/6547/10818/6506/6716/317/200894/10092/1141/55236/4929/220/664/23380/3736/116/3014/4642/22903/64919/558/57142…	108
GO:0072001	renal system development	87/3204	286/18493	3.15683e-08	7.90218e-06	6.3017e-06	50484/4208/4811/5915/6495/25836/1028/2668/84445/55366/9353/9096/3217/185/6659/342184/4072/186/25976/284/4070/11231/4953/2294/2736/30812/6943/1634/5087/7046/80144/27031/51301/157506/384/596/5314/255738/2028/26585/2719/282679/26146/51804/26249/7849/56998/4088/317/51196/4090/285/4087/5613/5125/80310/2043/9863/2246/2045/4774/28514/93649/4358/84159/5156/6299/3691/5311/1285/9231/2018/3037/654/51057/542…	87
GO:0001655	urogenital system development	95/3204	322/18493	3.94917e-08	9.50534e-06	7.58017e-06	50484/4208/8626/4811/5915/6495/6256/25836/1028/2668/84445/55366/9353/9096/3217/185/6659/342184/4072/186/25976/284/4070/11231/6599/4953/2294/2736/30812/6943/1634/5087/7046/80144/27031/51301/157506/384/596/5314/3400/255738/2028/26585/2719/282679/26146/51804/26249/7849/10818/56998/4088/317/51196/4090/285/4087/5613/5125/80310/2043/9863/2246/2045/4774/28514/93649/4358/1027/84159/5156/2099/6299/3691/53…	95
GO:0071902	positive regulation of protein serine/threonine kinase activity	95/3204	323/18493	4.65636e-08	1.07924e-05	8.60656e-06	2185/1654/7786/8491/8649/5515/1326/9043/11214/22943/9693/9839/154/493/7057/23411/3845/7852/8817/257397/5788/6188/57214/27347/51719/10253/10125/7046/54956/1906/4803/8322/2074/5899/4214/50507/8325/7855/255324/894/4215/5781/8654/57498/56034/3815/151195/10818/1432/3356/1399/51196/10178/5027/9175/151/728/376497/80310/2043/2246/9802/389432/1398/5602/6789/6885/219771/142679/5594/10746/5562/4293/5291/421…	95
GO:0007411	axon guidance	80/3204	259/18493	5.39752e-08	1.20635e-05	9.62017e-06	10048/10752/2044/1400/10371/2668/9353/27020/2887/7852/23768/2637/10512/26999/2736/57453/7976/57643/4009/10505/9846/8660/54910/6405/11041/23129/10154/2675/30011/5080/2534/5818/5781/3800/323/2674/3730/6324/214/10818/9378/57688/57556/2043/59277/64919/2045/56896/389549/6387/152330/8482/2549/8828/3798/7436/5594/4756/9252/10509/1808/91653/5291/6654/170302/4897/4684/2625/6464/85358/128434/65249/1949/574…	80
GO:0007611	learning or memory	77/3204	247/18493	6.20373e-08	1.33872e-05	1.06758e-05	23394/4208/29767/23259/25769/3091/4212/85461/836/27020/22943/4762/3845/8704/23657/3064/6532/10882/2334/114781/93986/4009/4891/4803/6529/2628/1385/3269/2475/2534/22849/4204/2237/3815/6547/2890/54207/5896/6198/3356/1141/55236/57144/8867/1742/9378/8301/10396/1979/23373/477/57468/8997/814/2915/7436/3949/5594/23236/5728/342371/22941/57030/7067/9757/577/7097/84502/2693/50801/4137/5582/1813/85358/5649/2…	77
GO:0097485	neuron projection guidance	80/3204	260/18493	6.49013e-08	1.35384e-05	1.07964e-05	10048/10752/2044/1400/10371/2668/9353/27020/2887/7852/23768/2637/10512/26999/2736/57453/7976/57643/4009/10505/9846/8660/54910/6405/11041/23129/10154/2675/30011/5080/2534/5818/5781/3800/323/2674/3730/6324/214/10818/9378/57688/57556/2043/59277/64919/2045/56896/389549/6387/152330/8482/2549/8828/3798/7436/5594/4756/9252/10509/1808/91653/5291/6654/170302/4897/4684/2625/6464/85358/128434/65249/1949/574…	80
GO:0016482	cytosolic transport	54/3204	154/18493	8.4262e-08	1.70101e-05	1.35649e-05	57533/51552/8675/9043/1601/54551/5962/7109/7813/57589/29062/9648/3799/22853/10652/1174/64089/51361/8411/9341/55435/55614/22836/84079/25963/90196/6643/51542/164/2060/29886/200576/4642/400/23041/55062/55638/3798/27252/5594/8729/10228/23085/51479/27131/9527/6653/8678/8938/55297/51209/9559/6272/1203	54
GO:0043401	steroid hormone mediated signaling pathway	63/3204	191/18493	1.00344e-07	1.91116e-05	1.52408e-05	8626/2908/5915/8312/5241/6256/6095/9063/23426/51366/2033/27086/23054/11214/1601/161582/7101/29079/10891/29966/23411/4734/9969/8204/8289/51341/6943/1408/2649/8085/2100/6502/865/81606/11240/4306/9975/55818/8648/4929/79039/51569/9575/11057/7533/2099/9572/9282/1655/7337/5925/142/7067/6096/5536/2101/5467/7068/133522/5914/898/9967/9125	63
GO:0048562	embryonic organ morphogenesis	85/3204	284/18493	1.0078e-07	1.91116e-05	1.52408e-05	23513/4208/3212/5915/6495/25836/84678/115908/3091/26018/3217/2778/7545/4760/51684/79977/4762/860/8092/2637/2294/8289/2736/79955/57453/6943/4040/10253/57534/9421/7976/7046/1906/4188/5396/121227/27031/157506/7855/5080/29/2487/23314/51804/4647/7849/10818/4323/55036/4088/4325/200894/7048/84189/348093/220/9750/613/4087/388591/344022/28514/204851/5156/6299/90/5594/5311/8323/3213/3200/2254/55084/6262/22…	85
GO:2000027	regulation of animal organ morphogenesis	67/3204	208/18493	1.11271e-07	2.04804e-05	1.63324e-05	3516/6495/6256/2668/115908/55366/163/55727/1173/8321/3217/1601/10370/22943/186/57154/860/4070/10512/84133/4982/30812/2252/7976/340419/93986/7046/1906/85407/27031/8322/2787/596/166336/7855/2119/26585/55294/2719/6431/51804/23002/7849/10818/7048/8324/388591/59277/9863/2246/54880/4300/7494/5292/2099/81839/90/8323/58524/2625/3207/1952/947/7068/55959/1856/2296	67
GO:0050808	synapse organization	107/3204	384/18493	1.4788e-07	2.6441e-05	2.10857e-05	10243/23394/4208/139065/6495/288/23613/2668/1006/347902/124925/8321/10059/2823/85461/27020/22943/27445/2743/4734/23768/23657/392617/9254/102/64101/10882/22899/4009/3480/7402/6405/23129/26037/7804/2332/7855/22866/2534/5818/4204/9758/2119/66000/29904/57555/386724/26059/2066/22865/51804/6678/54583/53942/1432/347730/23769/1141/10160/84189/1399/51104/58489/4644/1742/9378/60/782/2043/9863/1740/785/2045…	107
GO:0021537	telencephalon development	76/3204	248/18493	1.6455e-07	2.86042e-05	2.28108e-05	54407/5915/2044/84678/10371/63974/9353/3091/50937/836/6434/7101/9839/4760/493/8320/6497/23657/55970/3799/429/23353/6867/4040/93986/4009/10642/1281/153241/7804/26468/85458/3400/5080/552/66000/2066/6547/6506/6716/200894/55236/220/664/23380/3736/3014/22903/64919/57142/389549/6387/1021/23287/8482/26050/8828/6299/27164/23236/2018/5728/30837/79648/152789/170302/2145/55636/1902/1813/85358/2146/5649/2313…	76
GO:0001764	neuron migration	52/3204	149/18493	1.72627e-07	2.91973e-05	2.32838e-05	4208/10752/25836/26053/10371/2823/161582/9693/29967/23768/7155/23060/429/7976/1641/1281/9860/26468/5080/2534/23314/323/2066/6695/57698/4692/4929/23380/57556/558/285313/54328/389549/6387/5108/79791/6774/8828/4131/170302/4897/27185/2625/1813/5747/5649/9423/26012/23654/815/8929/137970	52
GO:0000209	protein polyubiquitination	78/3204	257/18493	1.77421e-07	2.92178e-05	2.33002e-05	10299/23327/7325/8452/26224/23291/5930/29089/51366/143279/146330/3093/54551/23014/91694/57154/57520/4734/80204/7326/23321/9870/387921/867/997/6048/54850/56254/899/131405/6502/596/26263/23304/26118/865/151636/9978/7332/51529/7323/7321/92912/84085/55294/26249/51132/996/54765/6500/26268/26235/54476/220972/23608/80196/285671/7336/79791/27252/10612/10210/26267/26234/7337/55905/54467/80829/23328/26259/…	78
GO:0048545	response to steroid hormone	108/3204	390/18493	1.82086e-07	2.92178e-05	2.33002e-05	8626/2908/5915/8312/5241/6256/6095/84676/9063/23426/4864/51366/5069/9353/3329/2033/27086/23054/11214/1601/836/161582/7101/29079/10891/3192/387758/10266/29966/7057/186/23411/4734/3845/9969/8204/8289/687/51341/6943/1026/1408/1906/2649/8085/2100/6502/596/121278/865/7332/2309/81606/11240/552/4306/9975/1789/6781/678/490/6678/55818/8648/4193/6198/6716/7048/4929/79039/51569/6898/116/4015/9575/8725/1515/…	108
GO:0050804	modulation of chemical synaptic transmission	114/3204	418/18493	1.99571e-07	3.12229e-05	2.48991e-05	23394/4208/2185/56853/1129/5908/23613/2668/25769/8526/9515/10059/1009/27020/22943/9693/2894/7101/5581/154/5270/9699/3845/23657/9254/3799/6532/8029/116443/64101/1906/4803/6529/6809/26037/7804/2332/1385/3269/2475/2534/10814/22849/29/4204/66000/57555/22930/23228/3815/6547/54583/2890/2898/2901/347730/776/3356/9590/1141/64854/1742/54476/10142/9378/729993/613/1979/116/2900/23373/2043/4355/477/6857/1523…	114
GO:1905330	regulation of morphogenesis of an epithelium	48/3204	134/18493	2.07395e-07	3.16556e-05	2.52442e-05	6495/6256/2668/115908/55366/163/55727/1173/8321/27086/3217/1601/22943/186/57154/4070/84133/30812/2252/7976/85407/27031/23122/8322/166336/2475/7855/6239/2119/26585/2719/51804/23002/7849/8324/388591/59277/9863/2246/4300/51548/2099/81839/8323/5728/2625/1952/1856	48
GO:0099177	regulation of trans-synaptic signaling	114/3204	419/18493	2.28164e-07	3.39964e-05	2.71109e-05	23394/4208/2185/56853/1129/5908/23613/2668/25769/8526/9515/10059/1009/27020/22943/9693/2894/7101/5581/154/5270/9699/3845/23657/9254/3799/6532/8029/116443/64101/1906/4803/6529/6809/26037/7804/2332/1385/3269/2475/2534/10814/22849/29/4204/66000/57555/22930/23228/3815/6547/54583/2890/2898/2901/347730/776/3356/9590/1141/64854/1742/54476/10142/9378/729993/613/1979/116/2900/23373/2043/4355/477/6857/1523…	114
GO:0042391	regulation of membrane potential	115/3204	424/18493	2.41102e-07	3.50888e-05	2.7982e-05	2891/1756/4208/2185/23327/56853/288/23613/3747/2729/2554/642938/124925/10401/2697/154/2743/10052/481/9699/4734/483/3799/2561/115111/116443/6330/64089/1634/6334/23530/11280/1906/9481/2745/9472/596/3759/3746/6326/2332/23620/8913/777/1146/2564/4204/66000/27068/57555/151647/5350/22930/1824/343450/6324/6547/11149/4719/2890/2898/2901/7224/776/1141/664/5027/1742/10142/3775/9378/3736/55186/116/23373/3885…	115
GO:0050890	cognition	84/3204	285/18493	2.48211e-07	3.53024e-05	2.81524e-05	23394/4208/29767/10752/25836/23259/25769/3091/4212/85461/836/27020/22943/4762/3845/8704/23657/3064/6532/10882/2334/114781/93986/4009/4891/4803/6529/2628/1385/3269/2475/2534/22849/4204/2237/3815/6547/2890/54207/5896/6198/3356/1141/55236/57144/8867/1742/9378/8301/10396/151556/1979/23373/6509/477/57468/8997/814/2915/7436/3949/5594/23236/5728/55084/342371/22941/152789/57030/7067/9757/577/7097/84502/2…	84
GO:0018205	peptidyl-lysine modification	101/3204	361/18493	2.65463e-07	3.66218e-05	2.92046e-05	8295/5563/10933/6612/23476/5929/9063/4221/2122/26053/5926/3720/23512/6613/79609/79960/51742/25942/2033/10401/53335/55870/6659/10891/26038/6018/23338/80314/23081/57673/23411/55677/80335/6877/9329/7994/387787/51200/5977/5903/200424/115426/51616/8085/2641/57337/3662/284058/4204/7799/825/84193/57691/80218/1789/8850/151194/8473/55818/2672/8648/6418/3713/55683/4193/59343/4015/9575/54880/93649/6885/9027…	101
GO:0016049	cell growth	128/3204	485/18493	2.69192e-07	3.66218e-05	2.92046e-05	23394/2185/23327/1654/10235/84678/26053/23677/10371/8470/5515/79960/9353/2697/55031/4856/185/11214/604/53335/9166/134430/9839/9792/5270/9699/186/23411/57154/26153/694/54617/10512/780/26999/102/1026/1982/4009/10505/7046/22902/1906/55909/4803/51616/54910/8085/9472/6405/10201/2100/596/2475/65059/552/2487/66000/323/26585/3621/23404/214/6695/51379/4323/5654/7224/23769/4088/57698/4692/7048/10276/91/571…	128
GO:0001763	morphogenesis of a branching structure	63/3204	196/18493	2.86424e-07	3.8137e-05	3.04129e-05	8626/5241/6495/25932/6256/10371/2668/55366/55727/9353/639/3217/1305/53335/79977/186/3845/2637/4070/10512/2294/780/2736/4041/30812/6943/2252/4040/10253/340419/5087/1906/157506/23129/441478/596/7855/10765/2119/26585/2719/51804/7849/10818/4323/56998/7048/9175/59277/2246/64399/2045/57142/6789/51548/2099/6299/90/5311/9231/3207/1813/8642	63
GO:0071900	regulation of protein serine/threonine kinase activity	130/3204	496/18493	3.29164e-07	4.29148e-05	3.4223e-05	2185/1654/7786/4221/1028/8491/8649/5515/1326/9043/11214/836/22943/9693/9839/154/5347/493/7057/23411/3845/7852/8817/257397/5788/6188/57214/3064/4041/51755/27347/51719/4040/10253/1026/54619/10125/7046/54956/3480/1906/993/4803/8322/2074/5899/4214/56940/899/4067/50507/8325/28951/7855/255324/894/4215/5781/8654/57498/64853/56034/8850/3815/151195/10818/1432/3356/1399/51196/10178/5027/9175/60/151/27250/7…	130
GO:0035567	non-canonical Wnt signaling pathway	39/3204	102/18493	4.09662e-07	5.22854e-05	4.16957e-05	115908/163/6934/1173/8321/1601/22943/57154/5534/51701/84133/7976/85407/27031/8322/166336/8325/27161/7855/1453/2487/2719/23002/8324/9863/26523/4300/6885/81839/8323/23236/6424/5330/1952/23500/1856/4343/54331/815	39
GO:0060627	regulation of vesicle-mediated transport	130/3204	498/18493	4.17748e-07	5.22854e-05	4.16957e-05	2244/23513/23327/1129/5908/192683/3673/10890/2042/163/11236/3685/57120/9515/10059/1601/22943/5962/27445/128637/9699/284/51762/2294/6347/5788/3799/116443/57534/867/114781/717/3690/9846/23122/146395/5899/4067/2332/163882/341359/255738/8913/27/10814/29/57102/57118/29904/84079/81/8674/2243/26585/196527/22930/2719/5587/5867/10859/11149/8027/2901/11069/347730/60561/776/9847/3356/1141/64854/27072/8867/2…	130
GO:0001822	kidney development	80/3204	271/18493	4.42434e-07	5.42893e-05	4.32937e-05	50484/4208/4811/5915/6495/25836/1028/2668/84445/55366/9353/3217/185/6659/342184/4072/186/25976/284/4070/4953/2736/30812/6943/1634/5087/7046/80144/27031/51301/157506/384/596/5314/255738/2028/26585/2719/282679/26146/51804/26249/7849/56998/4088/317/51196/4090/285/4087/5613/5125/80310/2043/9863/2246/2045/28514/4358/84159/5156/6299/5311/1285/9231/3037/654/51057/5420/2625/51107/3207/7161/8642/947/55959…	80
GO:0007265	Ras protein signal transduction	115/3204	430/18493	5.25005e-07	6.31823e-05	5.03856e-05	117178/8874/5908/10152/8452/10235/10890/26053/9411/51552/26084/185/11214/604/9693/5962/10966/57799/3845/8036/51762/10982/56990/10564/10253/1026/22899/55200/9448/1278/10125/440730/4893/1281/4803/55785/79930/54848/5899/23362/51277/57221/26269/9459/6239/29/54734/394/22836/221178/5587/10146/5867/440107/8473/57826/57698/9844/10160/10276/1399/51196/395/6242/9750/9909/51715/613/5921/23365/10617/1398/232…	115
GO:1903311	regulation of mRNA metabolic process	78/3204	264/18493	5.90618e-07	6.97375e-05	5.56131e-05	55796/56853/7529/10492/10921/2668/60680/29883/23369/10181/4154/10914/123169/253943/55147/10179/84530/6434/3192/11051/246175/9337/6429/10657/8087/55677/9567/51341/9698/79072/64506/7072/10644/10642/56254/11189/10643/131405/79577/2332/140890/55095/10140/27161/2475/1859/22849/11052/10236/29896/23404/6431/678/1432/6418/54464/3842/51441/114609/284071/54715/340719/23435/54855/58517/1655/57721/399664/186…	78
GO:0060562	epithelial tube morphogenesis	89/3204	313/18493	6.28224e-07	7.28042e-05	5.80587e-05	23513/4208/3516/5241/6495/25932/84678/90627/2668/115908/55366/9353/3091/8321/27086/3217/6659/9839/342184/51684/79977/186/3845/8092/2637/4070/6497/2294/8289/780/2736/4041/30812/6943/4040/10253/57534/9421/7976/340419/5087/1906/27031/54910/131405/157506/23129/441478/596/10765/2119/26585/2719/7798/51804/26249/7849/4323/55036/56998/4088/317/200894/7048/5613/388591/2043/344022/2246/64399/2045/28514/678…	89
GO:0050807	regulation of synapse organization	66/3204	214/18493	8.10882e-07	9.22636e-05	7.35769e-05	23394/4208/139065/6495/23613/1006/347902/8321/10059/2823/22943/4734/23768/23657/102/64101/22899/6405/26037/7804/2332/2534/5818/4204/9758/2119/29904/57555/386724/22865/51804/6678/54583/1432/347730/23769/1141/84189/51104/58489/9378/2043/2045/4076/8997/26050/7336/65981/3556/8828/55607/9231/5728/4897/10611/577/7097/2693/1813/85358/5747/5649/9423/22859/4038/9762	66
GO:0043406	positive regulation of MAP kinase activity	76/3204	258/18493	9.30544e-07	0.000103988	8.29268e-05	2185/7786/8491/8649/1326/9043/11214/22943/9839/7057/3845/7852/8817/257397/5788/6188/27347/10125/7046/1906/4803/8322/2074/4214/50507/8325/7855/255324/4215/5781/8654/57498/56034/3815/10818/1432/3356/1399/51196/10178/5027/9175/151/728/80310/2043/2246/389432/1398/5602/6885/142679/5594/10746/5562/4293/5291/4217/8600/23328/727/10454/8754/10333/2322/84451/84962/6416/1902/6464/5600/4296/7161/2146/7335/18…	76
GO:0034765	regulation of ion transmembrane transport	119/3204	454/18493	1.02227e-06	0.000112235	8.95031e-05	1756/4208/2185/23327/288/25932/3747/57120/5144/10891/5581/154/493/481/7057/57520/4734/3763/483/9254/3799/57214/3064/27347/51719/6330/6334/11280/1612/7402/91404/8660/2745/146395/1804/375346/9472/4067/3759/2040/3746/6326/2332/57620/79026/255738/2475/3750/8913/777/2534/56479/23204/81/825/57555/5350/196527/1520/9943/6324/10971/57628/54207/64924/5174/776/1181/5027/4644/1742/10142/3736/782/729993/3739/…	119
GO:0050803	regulation of synapse structure or activity	67/3204	220/18493	1.10951e-06	0.000119712	9.54658e-05	23394/4208/139065/6495/23613/1006/347902/8321/10059/2823/22943/4734/23768/23657/102/64101/22899/6405/26037/7804/2332/2534/5818/4204/9758/2119/29904/57555/386724/22865/51804/6678/54583/1432/347730/23769/1141/84189/51104/58489/9378/2043/2045/4076/8997/26050/7336/55638/65981/3556/8828/55607/9231/5728/4897/10611/577/7097/2693/1813/85358/5747/5649/9423/22859/4038/9762	67
GO:0010721	negative regulation of cell development	91/3204	326/18493	1.13397e-06	0.000120277	9.59168e-05	1400/10371/23405/9353/56478/50807/6657/53335/9693/430/7101/4070/1903/22882/10512/6497/112/6532/30812/429/57534/9448/5087/4009/10505/22902/1281/54910/283659/6405/9860/596/85458/3400/55435/5080/2309/27124/2487/4211/81/55294/10859/2066/6695/2672/7224/4193/23380/57556/116/7225/2043/5793/2045/57142/28514/54328/152330/5108/7533/8482/9529/6774/3949/5744/10509/5728/6653/10683/84894/1902/2192/56963/4804/2…	91
GO:2001222	regulation of neuron migration	20/3204	39/18493	1.31088e-06	0.000136725	0.000109033	25836/10371/9693/23768/23060/1281/9860/2066/57698/23380/57556/285313/54328/79791/6774/5649/26012/23654/815/137970	20
GO:0034968	histone lysine methylation	40/3204	110/18493	1.33746e-06	0.00013721	0.00010942	23476/5929/4221/2122/26053/5926/3720/23512/51742/55870/26038/6018/23081/57673/23411/55677/80335/200424/8085/2641/4204/7799/84193/1789/8473/55818/2672/54880/80854/93166/56950/51111/7468/9757/2145/2625/11105/2146/22823/54904	40
GO:0043087	regulation of GTPase activity	124/3204	481/18493	1.54092e-06	0.000155534	0.000124032	23513/8874/2185/9901/2044/10235/57533/255520/23677/90627/2042/9411/23232/154796/9353/23348/50807/9515/10059/604/729540/23143/9693/5962/343578/128637/7813/57589/84220/23076/10982/653489/9824/6347/727851/285190/57568/141/9732/10253/22899/55200/9448/64744/10125/54662/1236/5903/79822/55785/25782/6004/23129/10154/6354/26037/83478/9910/2475/4952/9459/10144/29/9743/394/54885/84079/55789/22930/64786/2315…	124
GO:0021675	nerve development	31/3204	77/18493	1.70394e-06	0.000169258	0.000134977	3212/6495/10371/23405/26018/5270/4762/2561/7412/4803/6405/9860/104/51804/1141/84189/1515/6507/8828/6299/89797/3213/3200/5582/55636/1902/23025/10497/55959/4884/8929	31
GO:0030111	regulation of Wnt signaling pathway	87/3204	311/18493	1.75525e-06	0.00017163	0.000136869	55182/3516/8312/1654/8452/115908/84445/1456/55366/51366/6934/5515/10042/79960/79718/5494/9096/8321/6657/55031/80319/1601/22943/6659/9839/2887/6497/51701/84133/4040/340419/205147/4188/85407/27031/8932/441478/79577/85458/865/10927/9978/2309/1453/169200/2487/26585/55789/2719/10146/27123/1432/56998/4088/59343/284654/5218/8324/54894/387914/6789/4300/7090/219771/2099/65981/6299/8323/6424/2254/100113407…	87
GO:0061458	reproductive system development	113/3204	431/18493	1.87459e-06	0.000178781	0.000142571	8626/3516/8728/5241/6256/4221/25836/1028/10371/5926/54477/55366/6874/9353/51742/639/3091/2186/836/10370/55870/430/5270/3157/79977/128637/8320/23411/25976/4762/22862/6599/8204/8289/2736/30812/6943/4040/4158/9421/1634/867/7046/4188/8322/899/157506/596/3400/3696/7855/2309/10765/8894/5781/22836/7110/7942/6781/3815/51804/54583/8648/10818/1432/4323/5654/1747/92/6716/9394/59343/23462/116/558/93649/1515/…	113
GO:0051961	negative regulation of nervous system development	84/3204	298/18493	1.88551e-06	0.000178781	0.000142571	1400/10371/23405/9353/56478/50807/6657/53335/9693/430/7101/51684/22882/10512/6497/112/6532/30812/429/57534/22899/9448/5087/4009/10505/22902/1281/54910/8646/283659/6405/9860/85458/3400/5080/2309/27124/4211/26146/2066/6695/2672/7224/4193/23380/57556/116/7225/2043/5793/2045/57142/28514/54328/152330/5108/7533/8482/9529/6774/3949/27242/10509/5728/6653/10683/7097/84894/1902/56963/4804/23251/7161/1949/5…	84
GO:0010506	regulation of autophagy	85/3204	303/18493	2.03052e-06	0.000189656	0.000151244	5563/57533/23677/10558/4864/8649/8925/3091/2033/10059/836/526/94241/154/23411/57154/4734/257397/10135/9550/3064/60412/5599/1634/1982/92140/1612/140775/6048/2072/25782/5899/256471/596/493856/258010/25827/8897/2475/7855/27/10346/387104/22930/7942/55294/5587/3099/5049/664/9517/149371/200576/11011/7416/7494/6885/1915/79443/3708/5562/58528/79837/4218/27131/5291/528/143686/8678/4137/54543/80772/23400/2…	85
GO:0070997	neuron death	92/3204	335/18493	2.12104e-06	0.000195198	0.000155663	23394/4208/8626/2185/6495/10752/7786/84678/4671/2668/2729/163/3091/3329/8321/836/22943/10891/2020/23411/284/3845/64802/10135/23321/23657/6347/2561/429/867/997/9481/4803/356/596/6326/1385/255738/2475/2309/2534/4204/104/55294/51804/54583/135112/2898/2901/6418/317/4929/664/8301/5921/16/728/558/2045/10617/6352/7336/9529/6774/27242/27324/6648/841/5925/11113/142/4217/835/84280/6653/112399/10333/6416/41…	92
GO:0048608	reproductive structure development	112/3204	428/18493	2.29142e-06	0.000207208	0.000165241	8626/3516/8728/5241/6256/4221/25836/1028/10371/5926/55366/6874/9353/51742/639/3091/2186/836/10370/55870/430/5270/3157/79977/128637/8320/23411/25976/4762/22862/6599/8204/8289/2736/30812/6943/4040/4158/9421/1634/867/7046/4188/8322/899/157506/596/3400/3696/7855/2309/10765/8894/5781/22836/7110/7942/6781/3815/51804/54583/8648/10818/1432/4323/5654/1747/92/6716/9394/59343/23462/116/558/93649/1515/6789/1…	112
GO:0061013	regulation of mRNA catabolic process	47/3204	140/18493	2.31776e-06	0.000207208	0.000165241	7529/10492/2668/29883/23369/253943/55147/3192/246175/9337/8087/9567/9698/79072/10644/10642/10643/131405/2332/55095/10140/27161/2475/22849/10236/23404/678/1432/6418/54464/3842/51441/114609/284071/340719/23435/54855/57721/399664/1869/677/50804/23367/4615/55802/4343/9967	47
GO:0030099	myeloid cell differentiation	107/3204	405/18493	2.38644e-06	0.000210342	0.00016774	55553/4792/4208/2185/3516/5929/1028/5926/2313/4286/6886/29909/25942/3091/2033/10401/123169/27086/3217/23054/604/4212/836/2778/7057/23411/7994/51341/7049/1236/10234/9846/4891/8085/4067/9991/79577/1385/865/2475/5771/2309/84522/3662/221395/3658/169200/27102/2551/5781/4211/5814/55294/8850/2719/10859/3815/1432/7030/92/56998/7066/135228/7048/91/4090/114609/130733/5613/28514/26523/1021/54861/8444/814/33…	107
GO:0007389	pattern specification process	113/3204	434/18493	2.67744e-06	0.000232714	0.000185581	4208/8626/3212/163589/3516/6495/84678/10371/2668/3091/2033/9096/3217/80319/2186/50937/161582/10370/22943/6434/9839/7545/4760/51684/8320/4762/8092/2637/10512/6497/2294/79728/2736/4041/57453/429/4040/57534/9421/444/130399/5087/7046/10655/1906/4188/5090/85407/27031/8646/6405/441478/5991/7855/5080/3219/23314/64853/26585/2719/6781/26146/2066/56983/7849/10818/55036/92/56998/4088/200894/7048/91/1399/409…	113
GO:0009612	response to mechanical stimulus	62/3204	204/18493	2.95716e-06	0.000253506	0.000202162	4792/1756/54407/2185/3673/2729/4212/5601/55342/5138/5270/4762/3064/79955/23353/5599/1634/93986/1906/355/1281/8932/4214/3759/3746/2534/1116/5781/3815/1432/4323/6198/3356/7048/84189/664/5027/285/9378/3736/8797/9750/168507/477/6387/6507/22927/5311/10746/6323/841/6262/835/654/63982/136319/6416/50801/3727/1813/85358/4615	62
GO:0018022	peptidyl-lysine methylation	43/3204	125/18493	2.99808e-06	0.00025354	0.000202189	23476/5929/4221/2122/26053/5926/3720/23512/79609/51742/55870/26038/6018/23081/57673/23411/55677/80335/200424/8085/2641/3662/4204/7799/84193/1789/151194/8473/55818/2672/54880/80854/93166/56950/51111/7468/9757/2145/2625/11105/2146/22823/54904	43
GO:0009755	hormone-mediated signaling pathway	70/3204	240/18493	3.61957e-06	0.000302017	0.000240847	8626/2908/5915/8312/5241/6256/6095/9063/23426/55366/51366/2033/27086/23054/11214/1601/161582/7101/29079/10891/29966/23411/4734/9969/8204/8289/51341/6943/1408/2649/8085/2100/6502/865/81606/11240/4306/5781/9975/55818/8648/4929/79039/51569/376497/9575/6751/11057/7533/2099/9572/5741/9282/1655/59350/7337/5925/142/7067/6096/2693/5536/2101/5467/7068/133522/5914/898/9967/9125	70
GO:0043488	regulation of mRNA stability	41/3204	118/18493	3.78969e-06	0.000308499	0.000246017	7529/10492/2668/23369/253943/55147/3192/246175/8087/9698/79072/10644/10642/10643/131405/2332/55095/2475/22849/10236/23404/678/1432/6418/54464/3842/51441/114609/284071/23435/54855/57721/399664/1869/677/50804/23367/4615/55802/4343/9967	41
GO:0043487	regulation of RNA stability	43/3204	126/18493	3.79585e-06	0.000308499	0.000246017	7529/10492/2668/23369/253943/55147/3192/246175/8087/9698/79072/10644/10642/10643/131405/7133/2332/55095/2475/22849/10236/23404/678/9887/1432/6418/54464/3842/51441/114609/284071/23435/54855/57721/399664/1869/677/50804/23367/4615/55802/4343/9967	43
GO:0043405	regulation of MAP kinase activity	91/3204	335/18493	3.93147e-06	0.000315425	0.00025154	2185/7786/8491/8649/5515/1326/9043/11214/22943/9839/7057/3845/7852/8817/257397/5788/6188/51755/27347/10253/10125/7046/3480/1906/4803/8322/2074/4214/56940/4067/50507/8325/28951/7855/255324/4215/5781/8654/57498/64853/56034/3815/10818/1432/3356/1399/51196/10178/5027/9175/151/27250/728/80310/2043/2246/389432/1398/5602/6885/142679/5594/10746/7251/5562/4293/5291/1850/81848/4217/11329/8600/6653/23328/72…	91
GO:1900006	positive regulation of dendrite development	28/3204	69/18493	4.44771e-06	0.000352326	0.000280967	23613/10059/29993/26039/54664/5597/7804/2332/2475/22849/29904/84079/23373/2043/84298/4076/8997/79791/65981/7436/55607/9231/22941/26259/1902/85358/2146/5649	28
GO:0003002	regionalization	92/3204	341/18493	4.73429e-06	0.00037034	0.000295332	4208/8626/3212/163589/3516/6495/84678/10371/2668/2033/9096/3217/80319/2186/50937/10370/22943/6434/9839/4760/51684/8320/4762/8092/2637/10512/6497/2294/79728/2736/4041/57453/429/4040/57534/5087/7046/10655/1906/4188/5090/85407/8646/6405/441478/7855/5080/3219/64853/26585/2719/26146/56983/7849/10818/92/56998/4088/200894/1399/59343/57669/4087/5125/344022/2246/64399/28514/168507/389549/4300/204851/8828/…	92
GO:0021543	pallium development	53/3204	169/18493	5.5025e-06	0.000425119	0.000339017	54407/2044/10371/63974/9353/3091/50937/836/6434/7101/9839/4760/493/8320/55970/3799/429/23353/6867/4040/93986/4009/10642/1281/153241/7804/26468/85458/3400/5080/66000/6716/55236/664/23380/3736/3014/22903/57142/1021/8828/23236/2018/5728/30837/79648/170302/2145/2146/5649/23135/5914/317762	53
GO:0061138	morphogenesis of a branching epithelium	56/3204	182/18493	5.78467e-06	0.000441235	0.000351869	8626/5241/6495/25932/6256/10371/2668/55366/55727/9353/3217/79977/186/3845/2637/4070/10512/2294/780/2736/4041/30812/6943/2252/4040/10253/340419/5087/1906/157506/23129/441478/596/7855/10765/2119/26585/2719/51804/7849/10818/4323/56998/7048/59277/2246/64399/6789/51548/2099/6299/90/5311/9231/3207/8642	56
GO:0060348	bone development	62/3204	208/18493	5.94207e-06	0.000441235	0.000351869	4208/5915/56987/2313/871/6886/2033/27086/1305/5358/11214/2778/171023/4762/860/8817/23508/6497/5788/4041/124976/4040/10234/4664/2261/5781/4211/26585/56034/196527/55294/6781/10859/3815/6678/4323/6716/4325/7048/4090/51715/158326/9060/4153/5741/6424/55790/3037/79648/7468/8600/654/84895/3207/8642/25946/55959/309/5914/2296/7373/4880	62
GO:0030522	intracellular receptor signaling pathway	80/3204	288/18493	6.00698e-06	0.000441235	0.000351869	4792/55914/8626/2908/5915/8312/5241/6256/6095/9063/23426/51366/23369/2033/27086/23054/1601/161582/10370/29079/10891/29966/23411/171023/4734/9969/257397/8204/8289/51341/6943/9698/1408/8780/2649/8085/2100/6502/865/81606/23586/11240/9975/81/55818/8648/4929/79039/51569/9575/80196/6885/5292/7533/2099/6774/9572/9282/1655/841/7337/55252/5925/142/7067/6096/131566/10454/5536/2101/2146/7335/5467/7068/13352…	80
GO:0050768	negative regulation of neurogenesis	78/3204	279/18493	6.03407e-06	0.000441235	0.000351869	1400/10371/23405/9353/56478/50807/6657/53335/9693/430/7101/22882/10512/6497/112/6532/30812/429/57534/9448/5087/4009/10505/22902/1281/54910/283659/6405/9860/85458/3400/5080/2309/27124/4211/2066/6695/2672/7224/4193/23380/57556/116/7225/2043/5793/2045/57142/28514/54328/152330/5108/7533/8482/9529/6774/3949/10509/5728/6653/10683/84894/1902/56963/4804/23251/7161/1949/5747/6993/7068/9423/23500/23189/152…	78
GO:0051402	neuron apoptotic process	67/3204	230/18493	6.06363e-06	0.000441235	0.000351869	23394/4208/8626/2185/6495/10752/7786/84678/4671/2668/2729/3091/3329/836/10891/2020/284/3845/64802/23321/6347/2561/429/997/4803/356/596/6326/255738/2309/2534/4204/104/55294/51804/2898/2901/6418/317/4929/664/5921/16/728/558/2045/10617/7336/27242/27324/6648/5925/11113/142/835/112399/6416/5582/6453/2625/4804/128434/7301/4296/7068/2539/26012	67
GO:0048880	sensory system development	95/3204	357/18493	6.23382e-06	0.000448405	0.000357587	5915/56853/2820/25932/6256/9314/25836/84678/1028/10371/4286/639/3091/6657/2823/50937/64093/4212/7101/9839/4760/6498/493/79977/128637/1543/6497/23657/8289/4041/30812/84465/23093/4040/22899/1641/93986/7046/84440/85407/8322/356/3985/157506/1290/596/25945/7855/5080/118427/10765/5818/55714/4211/22930/26146/490/4647/10818/4088/7048/84189/114789/220/1181/7111/57010/64919/130557/28514/204851/23287/775/51…	95
GO:0046578	regulation of Ras protein signal transduction	65/3204	222/18493	6.89546e-06	0.000490361	0.000391045	117178/8874/8452/26053/26084/11214/604/5962/3845/8036/10982/56990/10564/10253/22899/55200/9448/10125/440730/1281/4803/55785/54848/23362/57221/26269/9459/29/221178/440107/8473/10160/10276/51196/9750/9909/613/5921/23365/10617/1398/23263/137735/19/8997/8729/115727/81848/9826/5662/5924/6654/221002/2840/23268/6453/1902/9266/6993/9649/23189/143872/50650/57706/2846	65
GO:0023061	signal release	115/3204	453/18493	7.89194e-06	0.000554918	0.000442527	2244/23513/8874/4208/1129/5908/9727/2044/3747/2587/6934/3091/9515/10059/4856/185/2778/6659/27445/4760/5581/9699/186/415116/51167/51762/5208/291/9254/3799/4041/116443/9448/130399/222546/1906/8660/8322/6809/4067/2641/2332/1385/5991/341359/777/84522/252983/10814/1803/10765/5781/57555/2243/7110/22930/26059/7849/2901/11069/3709/776/3356/1141/5027/8867/4644/9378/151/116/4087/3667/26258/9575/114088/6857…	115
GO:0061448	connective tissue development	74/3204	263/18493	8.06837e-06	0.00056102	0.000447393	55553/4208/5915/871/79718/64641/3091/4856/2778/10891/864/23411/860/8092/8817/2736/4041/30812/4040/9421/340419/7046/9658/1906/5396/392255/8091/54360/3400/3696/2261/1116/960/64764/2487/23314/11145/26585/6781/1513/1432/4088/7048/4090/114789/80856/56914/80310/4153/7494/84159/5741/5744/1289/3213/3200/2254/55790/656/7067/654/2101/6615/3207/5467/947/7227/399979/55959/309/5914/50515/7373/4880	74
GO:0030518	intracellular steroid hormone receptor signaling pathway	46/3204	142/18493	8.69179e-06	0.000594046	0.00047373	8626/2908/8312/5241/9063/23426/51366/2033/27086/23054/1601/161582/29079/10891/29966/23411/4734/9969/8204/8289/51341/6943/1408/8085/2100/6502/865/81606/11240/55818/8648/79039/51569/9575/7533/2099/9282/1655/7337/5925/142/5536/133522/898/9967/9125	46
GO:0001558	regulation of cell growth	107/3204	416/18493	8.74659e-06	0.000594046	0.00047373	23394/2185/23327/1654/10235/84678/23677/10371/5515/79960/9353/2697/55031/4856/185/604/53335/9166/134430/9792/5270/9699/186/23411/57154/26153/694/54617/10512/780/102/1026/1982/4009/10505/7046/22902/1906/4803/51616/54910/9472/6405/10201/2100/596/2475/552/2487/323/26585/3621/23404/6695/51379/4323/5654/7224/4088/57698/10276/91/57144/51196/9175/57556/6868/8725/2045/57142/340719/93649/1027/123879/6387/…	107
GO:0007215	glutamate receptor signaling pathway	33/3204	90/18493	8.92304e-06	0.000594046	0.00047373	2891/4208/2185/2894/10891/116444/154/116443/1612/747/146395/2332/2534/57555/9455/2890/2898/2901/1742/729993/2900/2892/6751/2915/81831/23236/22941/2917/50488/23025/85358/2916/5649	33
GO:0060996	dendritic spine development	33/3204	90/18493	8.92304e-06	0.000594046	0.00047373	4208/23613/50807/10059/102/5597/26037/7804/2332/2475/22849/2182/29904/55236/1742/23380/2043/84298/4076/57468/8997/65981/55607/9231/5728/22941/8976/10611/1902/85358/5649/815/9762	33
GO:0006814	sodium ion transport	63/3204	215/18493	9.21738e-06	0.000607183	0.000484206	1756/54407/6575/23327/288/25769/84068/5581/154/5270/493/481/159963/57520/4734/483/3799/27347/6330/6334/11280/200010/8884/7402/2745/6574/2040/6326/81539/285195/255738/81/196527/29099/6528/6526/8671/6324/6547/26249/123041/5027/3775/151258/5774/55117/477/7533/1272/254428/91749/81831/5311/6328/479/6323/57030/6327/1813/55238/79570/6535/9498	63
GO:0001654	eye development	93/3204	351/18493	9.386e-06	0.00061185	0.000487928	5915/56853/2820/25932/6256/9314/25836/84678/1028/4286/639/3091/6657/2823/50937/64093/4212/7101/9839/4760/6498/493/79977/128637/1543/6497/23657/8289/4041/30812/84465/23093/4040/22899/1641/93986/7046/84440/85407/8322/356/3985/157506/1290/596/25945/7855/5080/118427/10765/5818/55714/4211/22930/26146/490/4647/10818/4088/7048/84189/114789/220/1181/7111/57010/64919/130557/28514/204851/23287/775/5156/677…	93
GO:0090596	sensory organ morphogenesis	71/3204	251/18493	1.00016e-05	0.000640143	0.000510491	23513/5915/6495/25836/84678/115908/639/3091/26018/50937/7545/128637/4762/2637/6497/8289/2736/4041/79955/30812/84465/4040/10253/7976/1906/5396/121227/85407/356/1290/596/25945/7855/5080/118427/29/5818/55714/2487/4211/51804/4647/7849/10818/84189/220/9750/613/57010/28514/204851/23287/6774/6299/5594/8323/10210/1289/2254/55084/2295/6096/11078/51057/140469/9132/55636/2625/7068/9423/1856	71
GO:0060485	mesenchyme development	75/3204	269/18493	1.00246e-05	0.000640143	0.000510491	4208/3516/6495/10371/2668/2042/5515/3091/1601/10370/9839/8320/4734/8092/2637/70/11171/10512/2294/30812/6943/60412/4040/9421/7049/10505/7046/1906/54910/23122/157506/6405/8091/596/84541/2475/2487/26585/2066/56983/51804/4193/4088/7048/114990/23462/57669/27250/57556/4087/57142/8482/10439/54796/8828/90/5594/5311/1655/9231/10509/2254/5728/3037/23493/2295/10683/677/6615/2146/10630/8642/309/2296/8929	75
GO:0031589	cell-substrate adhesion	90/3204	338/18493	1.05244e-05	0.000664599	0.000529993	2244/10979/8874/4811/2185/4221/3673/2042/3685/1305/604/342184/5581/7057/284/4070/2294/780/7412/10562/9448/1236/3690/7402/340485/1281/23122/8322/56940/596/9341/54749/55435/6239/51144/10855/960/81/2243/26585/26515/6695/11149/4323/9358/4088/1399/25992/5829/55604/395/23380/285/57669/5921/84034/158326/5613/8324/5054/558/2196/1398/1021/133584/10225/3691/10420/64094/5728/5291/3037/11078/8754/51057/84168…	90
GO:0150063	visual system development	93/3204	352/18493	1.062e-05	0.000664599	0.000529993	5915/56853/2820/25932/6256/9314/25836/84678/1028/4286/639/3091/6657/2823/50937/64093/4212/7101/9839/4760/6498/493/79977/128637/1543/6497/23657/8289/4041/30812/84465/23093/4040/22899/1641/93986/7046/84440/85407/8322/356/3985/157506/1290/596/25945/7855/5080/118427/10765/5818/55714/4211/22930/26146/490/4647/10818/4088/7048/84189/114789/220/1181/7111/57010/64919/130557/28514/204851/23287/775/5156/677…	93
GO:0090276	regulation of peptide hormone secretion	60/3204	203/18493	1.11166e-05	0.000687428	0.000548198	2244/8874/2044/3747/6934/3091/9515/4856/6659/4760/5581/415116/51762/5208/291/9254/3799/4041/9448/130399/222546/8660/2641/5991/777/84522/252983/1803/5781/57555/2243/7849/11069/3709/776/116/3667/9575/6352/23435/775/3790/51714/1374/8997/6566/55638/9572/3708/8600/8938/23568/2693/55636/1813/8862/5467/4826/2867/90550	60
GO:0048814	regulation of dendrite morphogenesis	32/3204	87/18493	1.12582e-05	0.000687428	0.000548198	23327/10059/9693/7101/26039/57520/4734/102/26037/7804/2332/29904/84079/7224/1141/7225/2043/4076/5911/7533/8997/79791/65981/55607/5728/26259/10611/577/85358/5649/26012/9762	32
GO:0006914	autophagy	117/3204	466/18493	1.14242e-05	0.000687428	0.000548198	5563/57231/57533/23677/10558/4864/8649/8925/3091/2033/10059/836/526/94241/10891/154/23411/57154/4734/257397/10135/9550/23001/3064/60412/5599/1634/83734/1982/92140/1612/3920/140775/6048/137886/55432/2072/25782/5899/256471/596/493856/258010/25827/8897/2475/7855/27/10346/387104/54734/22930/7942/55294/5587/54874/8027/1513/3099/167410/5049/27072/664/9517/51715/149371/23710/11345/200576/22863/3320/1101…	117
GO:0061919	process utilizing autophagic mechanism	117/3204	466/18493	1.14242e-05	0.000687428	0.000548198	5563/57231/57533/23677/10558/4864/8649/8925/3091/2033/10059/836/526/94241/10891/154/23411/57154/4734/257397/10135/9550/23001/3064/60412/5599/1634/83734/1982/92140/1612/3920/140775/6048/137886/55432/2072/25782/5899/256471/596/493856/258010/25827/8897/2475/7855/27/10346/387104/54734/22930/7942/55294/5587/54874/8027/1513/3099/167410/5049/27072/664/9517/51715/149371/23710/11345/200576/22863/3320/1101…	117
GO:0070482	response to oxygen levels	92/3204	349/18493	1.301e-05	0.000775399	0.000618352	2185/3516/8453/6095/3673/3091/3329/2033/10059/836/10370/430/10891/5581/10266/481/1543/7057/23411/51167/7852/10135/9550/5163/6532/7412/1026/4194/64506/867/7049/1906/4891/55662/355/596/1385/9978/50507/2475/2309/6921/1803/4204/3658/29904/81/54890/1789/6781/6547/54583/3099/4323/4193/3709/4088/317/7048/114990/1141/4929/9777/664/285/7225/6868/93649/6387/3939/3778/5066/3708/5562/5728/6262/1869/112399/86…	92
GO:0050954	sensory perception of mechanical stimulus	50/3204	161/18493	1.34884e-05	0.000796327	0.000635041	2070/283310/6495/25836/3673/26018/84530/836/5270/80204/491/2561/57214/79955/10253/8322/113278/9860/5077/2534/5205/3815/9455/4647/53942/776/3356/1141/84189/4646/3736/9750/56914/7399/6387/6507/1285/89797/6323/55084/2917/9948/11078/140469/50801/9132/55636/79784/3784/7068	50
GO:0042692	muscle cell differentiation	97/3204	373/18493	1.40127e-05	0.000819548	0.000653559	55553/1756/4208/3516/5915/29767/6495/6256/6095/7504/8470/9043/4856/50937/11214/85461/836/22943/3192/10266/80314/186/23411/3845/70/6497/57496/2294/8289/9254/6895/1906/55909/54910/9472/596/26263/50507/2475/4204/552/825/84193/26585/84466/11155/3815/51804/11149/10818/1432/4323/80306/348093/23462/71/7111/9750/27250/8324/5573/28514/93649/7494/6443/8038/5156/25842/90/93166/1073/6648/2254/91653/5925/9794…	97
GO:0048511	rhythmic process	76/3204	276/18493	1.41957e-05	0.000822561	0.000655963	3131/23394/5563/5241/6095/26224/23291/55366/463/6667/9353/25942/2033/3363/836/5601/54551/10891/3192/23411/10135/8204/6532/687/5599/1408/114781/8322/121278/1385/3400/9956/2309/1859/1453/7008/10765/5500/4862/9975/56938/10236/8850/8473/7166/1644/1141/23373/5054/9575/558/5602/5066/1374/5156/2099/9572/1655/5562/5728/7337/3037/835/4808/6096/3751/79365/10499/5582/3727/4804/1813/5936/7301/2146/9967	76
GO:0001890	placenta development	47/3204	149/18493	1.53749e-05	0.000882717	0.000703934	3516/8728/6256/4221/1028/639/3091/2186/55870/430/79977/8320/8289/4158/9421/1634/4188/899/3696/7855/7942/6781/54583/8648/1432/5654/1747/9394/59343/23462/1515/6789/1027/57448/5594/79805/5311/841/23493/26259/677/2693/6615/5747/5467/57623/10049	47
GO:0006836	neurotransmitter transport	74/3204	268/18493	1.65058e-05	0.000939029	0.000748842	23513/4208/1129/5908/126969/8604/2668/9515/10059/27445/9699/23657/6533/6532/116443/1906/6529/6809/83733/4067/81539/2332/341359/3177/10814/6512/23204/6581/22930/26059/10859/2901/6506/1644/776/3356/1141/6530/9152/5027/8867/9378/116/10550/26258/114088/55117/9899/477/6857/6507/55607/112476/57030/8600/3766/51248/8938/5582/6853/84258/140730/6534/23025/1813/55238/8862/10497/9783/9627/6535/28964/388662/8…	74
GO:0044843	cell cycle G1/S phase transition	77/3204	282/18493	1.72977e-05	0.000975215	0.000777699	1654/23476/8453/7325/8452/9314/4221/5000/29883/1874/79960/2033/6659/5962/493/246175/1543/9337/6118/54617/6347/143384/1026/4194/6241/1876/997/993/131405/6502/596/79577/3400/10217/252983/894/55294/5537/2672/51379/4193/6198/91/59343/586/4171/6117/1027/123879/1021/7029/79791/8462/85456/4176/90/1017/5311/23236/5728/7465/5925/138151/4850/1869/835/56892/23133/56241/2146/25946/1978/898/25988/79027/9125/8…	77
GO:0006513	protein monoubiquitination	26/3204	66/18493	1.81557e-05	0.00101445	0.000808987	23327/8452/84678/29089/4591/123169/4734/867/10336/56254/56852/79577/151636/25827/9978/84541/7323/84333/5896/6500/54880/7251/10210/9810/23295/84861	26
GO:0036293	response to decreased oxygen levels	86/3204	325/18493	2.10629e-05	0.00116648	0.000930223	2185/3516/8453/6095/3673/3091/3329/2033/10059/836/10370/430/10891/5581/10266/481/1543/7057/23411/7852/10135/5163/6532/7412/4194/64506/867/7049/1906/4891/55662/596/1385/9978/50507/2475/2309/6921/1803/4204/3658/29904/81/54890/1789/6781/6547/54583/3099/4323/4193/3709/4088/317/7048/114990/1141/4929/9777/664/285/7225/6868/93649/6387/3939/3778/5066/3708/5562/5728/6262/1869/112399/8678/3751/677/7097/849…	86
GO:0098727	maintenance of cell number	46/3204	147/18493	2.36471e-05	0.0012981	0.00103519	8626/3516/9314/25836/84678/6886/56478/6657/123169/27086/430/6659/7101/23081/8320/22882/6497/8289/8243/5087/5396/79692/10642/8091/60485/79577/2309/81606/10893/3815/678/55818/7849/80306/4087/8324/28514/5108/6774/6299/9282/57721/79648/2146/22823/27257	46
GO:0010508	positive regulation of autophagy	37/3204	110/18493	2.52322e-05	0.00137307	0.00109497	5563/23677/10558/3091/94241/154/23411/57154/3064/1634/92140/1612/140775/25782/5899/258010/10346/22930/7942/5587/3099/5049/664/9517/6885/79443/5562/79837/5291/143686/8678/54543/23274/23367/58476/90678/665	37
GO:0045665	negative regulation of neuron differentiation	62/3204	217/18493	2.54545e-05	0.00137323	0.0010951	1400/10371/9353/56478/50807/6657/53335/9693/7101/22882/10512/112/6532/30812/429/57534/9448/5087/4009/10505/22902/54910/6405/9860/85458/3400/5080/2309/27124/4211/6695/2672/7224/4193/57556/7225/2043/5793/2045/57142/28514/152330/7533/8482/9529/10509/5728/84894/1902/56963/4804/23251/7161/1949/5747/7068/9423/23189/152559/27257/8929/4038	62
GO:0030072	peptide hormone secretion	68/3204	244/18493	2.58129e-05	0.00138066	0.00110103	2244/8874/2044/3747/6934/3091/9515/4856/6659/27445/4760/5581/9699/415116/51167/51762/5208/291/9254/3799/4041/9448/130399/222546/1906/8660/2641/5991/777/84522/252983/1803/5781/57555/2243/7849/11069/3709/776/4644/116/4087/3667/9575/6352/23435/775/3790/51714/1374/8997/6566/55638/9572/3708/8600/8938/23568/2693/55636/1813/8862/5467/4826/399979/2867/90550/387597	68
GO:1903313	positive regulation of mRNA metabolic process	28/3204	75/18493	2.84459e-05	0.0015086	0.00120305	56853/29883/123169/253943/55147/6434/11051/246175/9337/9567/9698/64506/11189/131405/79577/10140/27161/22849/10236/29896/678/51441/340719/57721/399664/677/4343/9967	28
GO:0022898	regulation of transmembrane transporter activity	68/3204	245/18493	2.97678e-05	0.00155508	0.00124012	1756/4208/2185/23327/288/3747/57120/5144/10891/5581/154/481/57520/4734/483/3799/3064/27347/51719/6330/1612/7402/2745/146395/375346/9472/596/2040/3746/2332/57620/79026/255738/81/57555/5350/1520/9943/6324/5174/776/4644/1742/10142/3736/60/782/729993/388591/7225/5774/785/477/7533/2915/81831/5311/5728/22941/6262/6327/84502/219527/50488/1813/85358/5649/6271	68
GO:0019827	stem cell population maintenance	45/3204	144/18493	2.9947e-05	0.00155508	0.00124012	8626/3516/9314/25836/84678/6886/56478/6657/123169/27086/430/6659/7101/23081/8320/22882/6497/8289/8243/5087/5396/79692/10642/8091/60485/79577/2309/81606/10893/3815/678/55818/7849/80306/4087/8324/28514/5108/6774/6299/9282/57721/79648/22823/27257	45
GO:0001666	response to hypoxia	83/3204	314/18493	3.03164e-05	0.00155508	0.00124012	2185/3516/8453/6095/3673/3091/3329/2033/10059/836/10370/430/10891/5581/10266/481/1543/7057/23411/7852/5163/6532/7412/4194/64506/7049/1906/4891/55662/596/1385/9978/50507/2475/2309/6921/1803/4204/3658/81/54890/1789/6781/6547/54583/3099/4323/4193/3709/4088/317/7048/114990/1141/4929/9777/664/285/7225/6868/93649/6387/3939/3778/5066/3708/5562/5728/6262/1869/112399/8678/3751/677/7097/84962/3777/1813/546…	83
GO:0016050	vesicle organization	83/3204	314/18493	3.03164e-05	0.00155508	0.00124012	55291/8452/10802/51552/8675/1173/9839/5270/128637/7109/9871/51762/63971/3799/10564/966/51361/8411/6809/356/50487/596/9341/1385/63915/10814/1453/54734/84079/8674/7110/375056/54874/282679/8027/4647/5537/5265/2890/2901/9847/23243/9519/27072/5027/8867/1742/8301/149371/1182/164/2060/26258/114088/9218/6857/9632/19/23673/51128/8406/8729/10228/7251/112476/5869/51479/4218/9527/57030/55654/8976/8938/9101/5…	83
GO:0016239	positive regulation of macroautophagy	25/3204	64/18493	3.09872e-05	0.00157276	0.00125422	5563/10558/3091/154/23411/57154/3064/1634/140775/25782/5899/22930/5049/664/9517/6885/79443/79837/143686/8678/54543/23274/23367/90678/665	25
GO:0001503	ossification	97/3204	380/18493	3.11637e-05	0.00157276	0.00125422	4208/8626/2185/3516/10492/4221/25836/115908/55366/3091/8321/6657/1305/64093/1009/3381/2778/22943/3192/154/51684/57154/860/8817/10143/6497/2736/4041/30812/23353/340419/5087/8646/1290/596/865/4664/3400/10140/2261/169200/23314/26585/196527/2719/5587/6781/9365/56172/9562/6678/1513/1432/4323/7286/7166/92/56998/4088/4325/4090/9188/5027/285313/54880/1021/1462/8482/25842/90/5594/5741/1655/5744/3200/2254/…	97
GO:1901214	regulation of neuron death	79/3204	296/18493	3.2484e-05	0.00162628	0.0012969	23394/4208/2185/6495/10752/7786/84678/4671/2668/2729/163/3091/3329/8321/836/22943/10891/2020/23411/284/3845/64802/23321/23657/6347/2561/429/867/997/4803/356/596/1385/255738/2475/2309/2534/4204/55294/51804/54583/135112/2898/2901/6418/4929/8301/5921/16/728/558/2045/10617/6352/7336/6774/27324/6648/841/142/4217/835/84280/6653/112399/10333/6416/4137/5582/6453/2625/5536/23400/128434/7301/4296/947/2539/…	79
GO:0060998	regulation of dendritic spine development	26/3204	68/18493	3.36034e-05	0.00166897	0.00133094	4208/23613/50807/10059/102/5597/26037/7804/2332/2475/22849/29904/2043/84298/4076/8997/65981/55607/9231/5728/22941/10611/1902/85358/5649/9762	26
GO:0043583	ear development	60/3204	210/18493	3.40827e-05	0.00167945	0.0013393	23513/3516/6495/25836/115908/6657/26018/7545/4760/4762/2637/780/2561/4610/2736/79955/10253/7976/1906/9481/5396/121227/157506/596/54360/29/2487/5781/51804/6678/4647/26020/7849/84189/220/9750/4171/613/28514/4358/1027/7399/6299/5594/8323/2254/55084/23493/11078/51057/140469/9132/55636/2625/3784/3777/8642/9423/1856/8929	60
GO:0030177	positive regulation of Wnt signaling pathway	41/3204	128/18493	3.51327e-05	0.00170023	0.00135587	55182/3516/8312/1654/1456/55366/51366/79718/5494/55031/1601/22943/6659/9839/6497/340419/85407/8932/441478/79577/85458/10927/1453/55789/2719/27123/4088/284654/4300/65981/6299/6424/2254/53944/7097/9101/27185/55959/130612/23500/23189	41
GO:0043547	positive regulation of GTPase activity	102/3204	405/18493	3.55231e-05	0.00170023	0.00135587	23513/8874/2185/9901/10235/57533/255520/90627/9411/23232/23348/50807/9515/10059/729540/9693/343578/128637/7813/57589/84220/10982/653489/9824/6347/727851/285190/57568/141/9732/22899/55200/9448/64744/10125/54662/1236/5903/79822/25782/6004/6354/26037/83478/9910/4952/9459/10144/29/9743/394/54885/84079/55789/22930/64786/23158/6102/116984/10276/6000/395/3996/23380/1983/8301/613/116/5921/23616/55114/575…	102
GO:0048638	regulation of developmental growth	87/3204	334/18493	3.55647e-05	0.00170023	0.00135587	23394/4208/3516/23327/6495/25836/6776/10371/3720/23286/53335/55777/134430/154/9699/57154/10512/9254/6532/8455/7049/10505/7046/22902/1906/85407/4803/54910/137964/9472/6405/596/60485/1385/2261/2475/55841/5781/4211/825/2066/51804/1432/7224/6198/57698/7048/9175/57556/2045/57142/28514/6789/6387/6857/5292/8482/10439/6774/23236/8835/10509/1808/4131/2254/5728/3984/23493/170302/4897/2693/4137/2335/55636/5…	87
GO:0046879	hormone secretion	81/3204	306/18493	3.55912e-05	0.00170023	0.00135587	2244/8874/9727/2044/3747/2587/6934/3091/9515/4856/185/2778/6659/27445/4760/5581/9699/186/415116/51167/51762/5208/291/9254/3799/4041/9448/130399/222546/1906/8660/8322/4067/2641/1385/5991/777/84522/252983/1803/10765/5781/57555/2243/7110/7849/11069/3709/776/4644/151/116/4087/3667/9575/6352/23435/775/3790/51714/1374/8997/6566/55638/9572/3708/8600/654/8938/23568/2693/55636/2625/1813/8862/5467/4826/399…	81
GO:0006644	phospholipid metabolic process	116/3204	473/18493	3.78366e-05	0.0017938	0.00143049	2170/2185/83394/126969/9314/10558/54886/79644/51552/8526/285172/81537/9306/3157/116150/8817/256987/29062/114882/55326/5359/2252/942/1236/5277/9846/23659/8660/84725/137964/50487/8651/84513/4067/9655/255738/2261/8897/4952/2534/27124/221395/4204/8395/5781/5286/22845/23761/11145/114884/5587/57515/5867/9365/2066/3815/81579/10818/22979/10162/3356/55500/7915/9517/619189/8867/5281/22908/3667/376497/20057…	116
GO:0007623	circadian rhythm	56/3204	193/18493	3.82252e-05	0.0017986	0.00143432	5563/6095/26224/23291/55366/463/25942/2033/3363/5601/54551/10891/3192/23411/10135/8204/6532/687/5599/1408/114781/121278/1385/3400/9956/1859/1453/5500/4862/9975/56938/10236/8473/7166/1644/1141/23373/5054/9575/5602/1374/9572/5562/5728/7337/6096/3751/79365/10499/5582/3727/4804/1813/5936/2146/9967	56
GO:0009914	hormone transport	83/3204	316/18493	3.87177e-05	0.00180818	0.00144195	2244/8874/9727/2044/3747/117247/2587/6934/3091/9515/4856/185/2778/6659/27445/4760/5581/9699/186/415116/51167/51762/5208/291/9254/3799/4041/9448/130399/222546/1906/8660/8322/4067/2641/1385/5991/777/84522/252983/1803/10765/5781/57555/2243/7110/7849/11069/3709/776/4644/151/116/4087/3667/9575/6352/23435/775/3790/51714/1374/8997/6566/55638/9572/3708/8600/654/8938/23568/2693/55636/2625/1813/8862/5467/4…	83
GO:0002064	epithelial cell development	58/3204	202/18493	3.91151e-05	0.0018132	0.00144596	23513/8626/5915/5241/5908/25932/5926/1874/51742/639/26084/3091/5144/9693/5138/5962/79977/128637/7716/1903/22862/79955/30812/79983/1026/137964/5991/5080/91522/6781/4647/10818/57826/2317/84189/7111/688/57669/9750/9863/9575/64919/28514/7494/1021/23086/2099/122786/57493/29842/654/11078/51057/2683/5420/2194/5914/2931	58
GO:0032412	regulation of ion transmembrane transporter activity	66/3204	238/18493	3.98142e-05	0.00183204	0.00146099	1756/4208/2185/23327/288/3747/57120/5144/10891/5581/154/481/57520/4734/483/3799/3064/27347/51719/6330/1612/7402/2745/146395/375346/9472/2040/3746/2332/57620/79026/255738/81/57555/5350/1520/9943/6324/5174/776/4644/1742/10142/3736/782/729993/388591/7225/5774/785/477/7533/2915/81831/5311/5728/22941/6262/6327/84502/219527/50488/1813/85358/5649/6271	66
GO:0046883	regulation of hormone secretion	71/3204	261/18493	4.11437e-05	0.00185731	0.00148114	2244/8874/9727/2044/3747/2587/6934/3091/9515/4856/185/2778/6659/4760/5581/186/415116/51762/5208/291/9254/3799/4041/9448/130399/222546/1906/8660/2641/1385/5991/777/84522/252983/1803/10765/5781/57555/2243/7110/7849/11069/3709/776/151/116/3667/9575/6352/23435/775/3790/51714/1374/8997/6566/55638/9572/3708/8600/654/8938/23568/2693/55636/1813/8862/5467/4826/2867/90550	71
GO:0060070	canonical Wnt signaling pathway	76/3204	284/18493	4.12069e-05	0.00185731	0.00148114	55182/3516/8312/1654/8452/9314/115908/84445/1456/55366/4286/51366/6934/79960/79718/5494/9096/8321/6657/55031/1601/22943/6659/84133/4041/4040/7976/340419/205147/85407/27031/8322/441478/85458/9978/8325/7855/2309/1453/169200/2487/26585/2719/10146/27123/1432/4088/4929/284654/5218/8324/6789/4300/7090/219771/65981/8323/6424/2254/100113407/4163/5728/6262/53944/9101/83595/2625/10297/27303/55959/130612/23…	76
GO:0042472	inner ear morphogenesis	33/3204	96/18493	4.13377e-05	0.00185731	0.00148114	23513/6495/115908/26018/7545/4762/2637/2736/79955/10253/7976/5396/121227/29/2487/51804/4647/7849/84189/220/9750/613/8323/2254/55084/11078/51057/140469/9132/55636/2625/9423/1856	33
GO:0048754	branching morphogenesis of an epithelial tube	46/3204	150/18493	4.15506e-05	0.00185731	0.00148114	5241/6495/25932/2668/55366/9353/3217/186/3845/2637/4070/2294/780/2736/4041/30812/6943/4040/10253/340419/5087/1906/157506/23129/441478/596/10765/2119/26585/2719/51804/7849/4323/56998/7048/2246/64399/6789/51548/2099/6299/90/5311/9231/3207/8642	46
GO:0035637	multicellular organismal signaling	52/3204	176/18493	4.19355e-05	0.00186122	0.00148426	288/3673/5144/2697/10052/125111/493/481/491/6330/444/6334/11280/3759/6326/2332/8913/552/5350/1824/6324/490/6547/2898/3709/776/10142/3775/3736/388591/477/775/3781/3708/6328/6263/6323/6262/6327/58524/3751/157378/4897/2693/4205/1760/79784/10699/3784/3777/60598/4880	52
GO:0060384	innervation	14/3204	27/18493	4.44097e-05	0.00195715	0.00156076	10371/26018/5270/2561/7412/9860/104/84189/5582/55636/23025/10497/55959/4884	14
GO:0031098	stress-activated protein kinase signaling cascade	82/3204	313/18493	4.73673e-05	0.0020729	0.00165306	2185/8312/7786/260425/4221/2122/10371/23291/8491/1326/9043/5601/22943/10771/9839/257397/6188/27347/5599/9448/10125/1236/3480/1906/392255/355/54910/8322/2074/4214/56940/4067/51765/8325/7855/9459/4215/64853/9943/8428/2898/1432/6500/57144/1399/9175/114609/27250/140885/8324/2043/10550/389432/5602/6789/5911/6885/142679/56924/5594/10746/23236/55504/4293/4217/8600/23328/10454/2218/677/10333/7498/84451/6…	82
GO:0043161	proteasome-mediated ubiquitin-dependent protein catabolic process	98/3204	389/18493	4.94396e-05	0.00214856	0.0017134	10299/23327/8452/26224/2729/23291/79139/6613/79718/146330/80311/3093/1601/5601/122809/6782/5347/23411/57154/57520/4734/9817/7326/23321/5527/6599/9870/387921/80267/997/79734/6048/137886/54850/55432/899/131405/6502/26263/258010/23304/9655/25827/9978/28951/51529/7323/7321/1453/23510/55294/8473/5682/996/4193/10956/6500/26268/26235/8405/10613/54476/23190/92369/9575/11011/114088/9709/80196/25852/285671…	98
GO:0010498	proteasomal protein catabolic process	111/3204	452/18493	5.18658e-05	0.00223845	0.00178509	10299/23327/8452/26224/2729/23291/11236/9532/79139/6613/79718/84236/146330/80311/3093/1601/5601/161582/122809/9306/6782/5347/23411/57154/57520/4734/9817/7326/23321/5527/6599/9870/387921/80267/997/79734/6048/137886/54850/55432/899/131405/6502/26263/258010/23304/2332/9655/25827/9978/28951/51529/7323/7321/1453/23510/7110/11101/55294/8473/5682/996/4193/10956/6500/26268/8507/26235/8405/10613/54476/113…	111
GO:0099504	synaptic vesicle cycle	56/3204	195/18493	5.23918e-05	0.0022445	0.00178991	115548/23513/1129/5908/9515/10059/29993/27445/9699/116443/114781/8411/6809/2332/341359/10814/57555/8674/22930/26059/2901/11069/1644/776/3356/1141/5027/8867/71/9378/1182/26258/9863/114088/5337/6857/10228/134957/112476/5728/57030/5582/6453/6853/9829/84258/140730/23025/1813/10497/9783/5338/6456/28964/57706/815	56
GO:0048167	regulation of synaptic plasticity	51/3204	173/18493	5.27232e-05	0.0022445	0.00178991	4208/2185/25769/27020/9693/7101/5270/9699/3845/6809/26037/2332/1385/3269/10814/22849/4204/22930/3815/6547/2890/2898/347730/1742/729993/1979/23373/2043/4355/152330/7533/2915/55607/5594/112476/4218/5728/22941/3766/84502/4137/140730/23025/1813/85358/10497/9783/5649/5914/26012/815	51
GO:0000082	G1/S transition of mitotic cell cycle	71/3204	263/18493	5.36585e-05	0.00226889	0.00180935	1654/23476/8453/7325/8452/9314/5000/29883/1874/79960/2033/6659/5962/246175/1543/9337/6118/54617/6347/143384/1026/4194/6241/1876/997/993/131405/6502/596/79577/3400/10217/894/5537/2672/51379/4193/6198/91/59343/586/4171/6117/1027/123879/1021/7029/79791/8462/85456/4176/90/1017/5311/23236/5728/7465/5925/138151/4850/1869/835/23133/2146/25946/1978/898/25988/79027/9125/815	71
GO:0061014	positive regulation of mRNA catabolic process	19/3204	44/18493	5.44125e-05	0.00228533	0.00182246	29883/253943/55147/246175/9337/9567/9698/131405/10140/27161/22849/10236/678/51441/340719/57721/399664/677/4343	19
GO:0046777	protein autophosphorylation	63/3204	227/18493	5.73917e-05	0.00237853	0.00189679	2185/7786/7443/415116/57396/1196/4117/5527/51701/780/5788/22853/51755/27347/1612/3480/5593/4067/51765/2261/2475/27/2534/1859/4215/27102/29904/26585/56034/5587/10111/2066/3815/9943/8428/92597/57826/91/9175/613/5613/80310/2043/2045/6789/5911/5292/5156/85456/4293/2322/84451/5582/9770/50488/23400/7301/4296/5747/5753/2046/815/23049	63
GO:0060560	developmental growth involved in morphogenesis	63/3204	227/18493	5.73917e-05	0.00237853	0.00189679	23394/23327/6495/26053/10371/9353/53335/134430/9839/342184/9699/57154/10512/780/26999/4040/10253/10505/22902/55909/85407/4803/54910/157506/6405/65059/10765/66000/214/51804/7224/23769/57698/4692/7048/9175/57669/57556/84298/9863/2246/3320/2045/57142/6387/6857/51548/8482/10439/2099/8828/6299/10509/1808/4131/3984/4897/4137/2335/84258/23025/9423/6456	63
GO:0060078	regulation of postsynaptic membrane potential	43/3204	139/18493	5.80394e-05	0.00238954	0.00190557	2891/4208/2185/56853/23613/2554/642938/124925/154/2743/9699/2561/116443/1146/2564/4204/66000/57555/22930/6547/2890/2898/2901/1141/5027/1742/9378/3736/116/4355/2892/2915/55607/5728/22941/57030/2569/3751/1813/85358/10497/5649/2931	43
GO:0007416	synapse assembly	49/3204	165/18493	5.96177e-05	0.00243848	0.0019446	23394/4208/139065/6495/347902/8321/2823/27020/27445/23768/23129/7855/5818/4204/29904/57555/386724/2066/22865/51804/53942/347730/23769/1141/10160/84189/1399/9378/9863/2045/26050/7336/3556/55607/9231/5728/22941/56131/4897/10611/577/7097/2693/1813/85358/5747/9423/22859/4038	49
GO:0099003	vesicle-mediated transport in synapse	58/3204	205/18493	6.18056e-05	0.00251155	0.00200287	115548/23513/1129/5908/23426/163/9515/10059/29993/27445/9699/116443/114781/3690/8411/146395/6809/2332/63915/341359/10814/3800/57555/8674/22930/26059/2901/776/3356/1141/64854/1176/5027/8867/71/2060/26258/114088/6857/3798/10228/112476/4218/57030/5582/6453/6853/9829/84258/140730/23025/1813/10497/9783/6456/28964/57706/815	58
GO:0048839	inner ear development	53/3204	183/18493	6.41599e-05	0.00259041	0.00206575	23513/3516/6495/115908/6657/26018/7545/4760/4762/2637/2561/4610/2736/79955/10253/7976/9481/5396/121227/54360/29/2487/5781/51804/6678/4647/26020/7849/84189/220/9750/4171/613/28514/4358/1027/7399/8323/2254/55084/23493/11078/51057/140469/9132/55636/2625/3784/3777/8642/9423/1856/8929	53
GO:0060999	positive regulation of dendritic spine development	18/3204	41/18493	6.53336e-05	0.00262088	0.00209006	23613/10059/5597/7804/2332/2475/22849/29904/84298/4076/8997/65981/55607/9231/22941/1902/85358/5649	18
GO:0032409	regulation of transporter activity	70/3204	260/18493	6.61562e-05	0.00263698	0.00210289	1756/4208/2185/23327/288/3747/57120/5144/55917/10891/5581/154/481/57520/4734/483/3799/3064/27347/51719/6330/1612/7402/2745/146395/375346/9472/596/2040/3746/2332/57620/79026/255738/81/57555/5350/1520/9943/6324/5174/776/54602/4644/1742/10142/3736/60/782/729993/388591/7225/5774/785/477/7533/2915/81831/5311/5728/22941/6262/6327/84502/219527/50488/1813/85358/5649/6271	70
GO:0048762	mesenchymal cell differentiation	59/3204	210/18493	6.67008e-05	0.00264186	0.00210678	4208/3516/10371/2668/2042/5515/3091/1601/9839/8320/8092/2637/11171/10512/30812/6943/4040/7049/10505/7046/1906/54910/23122/157506/6405/8091/596/84541/2475/2487/26585/2066/4088/7048/114990/23462/57669/27250/57556/4087/57142/8482/10439/8828/90/5594/1655/9231/10509/5728/3037/23493/2295/6615/2146/10630/309/2296/8929	59
GO:0051216	cartilage development	58/3204	206/18493	7.17143e-05	0.00282257	0.00225089	55553/4208/5915/871/3091/4856/2778/864/860/8092/8817/2736/4040/9421/340419/7046/1906/5396/392255/8091/54360/3696/2261/1116/960/64764/2487/23314/26585/6781/1513/1432/4088/7048/4090/80856/56914/4153/5741/5744/3213/3200/2254/55790/656/7067/654/2101/6615/3207/7227/399979/55959/309/5914/50515/7373/4880	58
GO:0008654	phospholipid biosynthetic process	75/3204	284/18493	7.37907e-05	0.00287972	0.00229647	2170/83394/126969/10558/79644/51552/8526/3157/116150/8817/256987/55326/5359/2252/5277/9846/8660/84725/137964/2261/8897/4952/27124/221395/8395/5781/5286/22845/23761/11145/57515/5867/9365/81579/10818/10162/3356/55500/9517/619189/8867/5281/22908/3667/376497/200576/2246/9110/129642/5337/2549/5322/9926/142891/94005/51099/171586/79837/253558/2254/259230/5728/5291/65977/10026/1040/56910/2322/377/84962/3…	75
GO:2000649	regulation of sodium ion transmembrane transporter activity	21/3204	52/18493	7.40868e-05	0.00287972	0.00229647	1756/23327/288/5581/481/57520/4734/3799/27347/6330/7402/2745/2040/255738/81/6324/5774/477/7533/81831/6327	21
GO:0050779	RNA destabilization	14/3204	28/18493	7.46812e-05	0.00288491	0.00230061	253943/55147/246175/9698/131405/7133/22849/10236/678/51441/57721/399664/677/4343	14
GO:0061337	cardiac conduction	36/3204	111/18493	7.68494e-05	0.00294113	0.00234544	5144/2697/10052/125111/493/481/491/6330/444/3759/8913/5350/1824/6324/490/6547/3709/776/10142/3775/388591/477/775/3781/3708/6263/6262/6327/157378/4205/1760/10699/3784/3777/60598/4880	36
GO:0043523	regulation of neuron apoptotic process	57/3204	202/18493	7.70766e-05	0.00294113	0.00234544	23394/4208/2185/6495/10752/7786/84678/4671/2668/2729/3091/3329/836/10891/2020/284/3845/64802/23321/6347/2561/429/997/4803/356/596/255738/2309/2534/4204/55294/51804/2898/2901/6418/4929/5921/16/728/558/2045/10617/7336/27324/6648/142/835/112399/6416/5582/6453/2625/128434/7301/4296/2539/26012	57
GO:0021700	developmental maturation	72/3204	271/18493	8.28804e-05	0.00314343	0.00250677	163589/2185/3516/5241/1028/6886/124925/3091/3600/53335/860/51341/30812/429/10882/1026/22899/137964/596/9991/26468/63915/865/5991/64100/2261/2475/7855/2309/4204/84079/26585/64434/196527/4929/9175/4644/1742/51441/9378/8301/1182/164/26258/59277/558/4774/7494/11057/55638/5741/5728/5925/29842/57030/4897/8938/577/2625/5064/23025/10497/8642/5649/399979/2539/5139/84456/1203/22859/2046/4880	72
GO:0001738	morphogenesis of a polarized epithelium	32/3204	95/18493	8.38858e-05	0.00316239	0.00252189	8626/10890/115908/163/1173/8321/1601/22943/57154/2294/84133/7976/85407/27031/8322/166336/7855/2719/26146/23002/23616/8324/9863/4300/81839/8323/9231/9948/2295/23245/1952/1856	32
GO:0007626	locomotory behavior	55/3204	194/18493	8.89296e-05	0.00330849	0.0026384	10752/23259/2668/4864/463/6886/124925/7545/5581/2743/8704/8029/9698/10882/114781/4009/5090/8322/1803/4204/2119/4211/57555/56172/4857/347730/1141/55236/4929/84189/57144/220/4644/7111/2043/477/6387/8997/2915/89797/6323/5728/1267/55084/58524/3766/3751/2693/10499/55636/1813/127343/29801/1949/25946	55
GO:0060541	respiratory system development	55/3204	194/18493	8.89296e-05	0.00330849	0.0026384	3516/5241/6495/2033/79977/171023/3845/8817/6497/23657/2294/2736/429/6943/2252/4040/10253/340419/93986/27031/157506/60485/1385/9678/1116/55294/2719/6431/51804/6678/4323/55036/7048/9394/220/4087/83716/4015/2246/64399/93649/5156/5594/9231/57493/2254/342371/7067/10454/51057/55636/10630/7068/5914/8929	55
GO:0030073	insulin secretion	57/3204	203/18493	8.93473e-05	0.00330849	0.0026384	2044/3747/6934/3091/9515/4856/6659/27445/4760/5581/9699/415116/51167/5208/291/9254/3799/4041/9448/130399/222546/8660/2641/5991/777/84522/252983/1803/5781/57555/11069/3709/776/4644/116/4087/3667/9575/6352/23435/775/3790/51714/1374/6566/55638/9572/3708/8938/23568/2693/1813/5467/4826/399979/90550/387597	57
GO:0034248	regulation of cellular amide metabolic process	110/3204	453/18493	9.11485e-05	0.00332865	0.00265448	2185/56853/1654/1975/6256/94103/10492/3673/29883/11236/23369/54517/56478/253943/55147/6659/56648/246175/9337/7057/10657/8087/23657/5163/6188/9698/79072/5813/6895/64506/7072/1982/1612/57546/10644/10642/285367/10643/131405/55066/2332/89978/55095/10140/84541/27161/2475/285381/2309/1974/22849/3658/27102/100132911/10236/387338/678/51611/6198/54464/8507/51441/1983/8301/1979/16/6311/7175/2043/2107/34071…	110
GO:0042471	ear morphogenesis	37/3204	116/18493	9.12827e-05	0.00332865	0.00265448	23513/6495/25836/115908/26018/7545/4762/2637/2736/79955/10253/7976/1906/5396/121227/29/2487/51804/4647/7849/84189/220/9750/613/6299/5594/8323/2254/55084/11078/51057/140469/9132/55636/2625/9423/1856	37
GO:0007223	Wnt signaling pathway calcium modulating pathway	16/3204	35/18493	9.16074e-05	0.00332865	0.00265448	6934/22943/5534/51701/7976/8322/27161/7855/26523/6885/8323/23236/5330/4343/54331/815	16
GO:0060537	muscle tissue development	98/3204	395/18493	9.23192e-05	0.00332865	0.00265448	55553/3131/4208/3516/5915/6495/6256/79647/7504/7763/8470/3720/2033/50937/11214/22943/10891/3192/10052/8320/186/25976/70/10512/6497/57496/8289/30812/6943/9421/1634/93986/7049/7046/1906/55909/1281/9472/596/26263/60485/1385/50507/2475/4211/9975/26585/5350/84466/2066/56983/51804/11149/54583/10818/1432/2317/6198/4088/7048/688/9750/8324/5573/28514/93649/5292/51548/6443/5156/56261/90/5311/1655/1073/5562…	98
GO:1904062	regulation of cation transmembrane transport	81/3204	314/18493	9.25512e-05	0.00332865	0.00265448	1756/4208/2185/23327/288/3747/5144/10891/5581/154/493/481/57520/4734/483/3799/57214/3064/27347/51719/6330/1612/7402/91404/2745/146395/1804/375346/9472/4067/3759/2040/3746/2332/57620/79026/255738/2534/81/825/57555/5350/196527/1520/9943/6324/57628/64924/5174/776/4644/1742/10142/3736/782/729993/388591/5774/785/477/775/7533/3781/81831/5311/5728/22941/6262/6327/84959/84502/219527/6373/55636/3784/50488…	81
GO:0099173	postsynapse organization	47/3204	159/18493	9.44337e-05	0.00333672	0.00266091	10243/23613/2668/10059/85461/2743/23657/102/64101/3480/6405/26037/7804/22866/2534/9758/2119/66000/29904/57555/54583/347730/51104/58489/1742/9378/60/2043/9863/1740/2045/4076/8997/65981/3556/8828/55607/5728/22941/8976/4897/10611/2693/85358/5649/4038/9762	47
GO:0007613	memory	36/3204	112/18493	9.459e-05	0.00333672	0.00266091	23394/25769/8704/6532/114781/4009/4803/1385/3269/2475/22849/4204/2237/6547/2890/54207/6198/3356/1141/57144/1979/23373/8997/814/7436/3949/23236/5728/342371/57030/9757/50801/4137/1813/85358/5649	36
GO:0048732	gland development	106/3204	434/18493	9.52122e-05	0.00333672	0.00266091	23513/8626/3516/5915/5241/6495/6256/8452/3673/1028/6776/10371/3720/55727/3091/5253/6657/3664/10370/55870/5270/3157/1543/171023/3845/11231/6599/10512/2294/780/2736/4041/429/6943/2252/4040/5087/7049/7046/8660/27031/137964/23129/596/1385/3400/255738/5080/81606/6239/10765/394/3219/2119/2487/55294/64841/2066/51804/7849/10818/3099/5896/7166/55036/4088/7048/1399/220/1181/116/4087/59277/64919/5774/57142/…	106
GO:0045444	fat cell differentiation	60/3204	217/18493	9.53511e-05	0.00333672	0.00266091	6095/9314/25836/79689/6934/79718/64641/2033/10891/3192/154/23411/171023/114882/4041/51341/30812/9658/392255/8651/8091/60485/83643/1385/3400/284273/28951/2475/862/221395/169200/2487/115825/678/168455/1432/7166/3356/4088/4929/26268/664/59343/688/6789/7494/84159/9572/23236/1240/55252/30837/1869/677/2625/25999/5467/25946/2867/6272	60
GO:0071559	response to transforming growth factor beta	67/3204	249/18493	9.54414e-05	0.00333672	0.00266091	55553/10979/4208/2908/4221/1028/4093/463/4053/5494/2033/1601/10370/5138/10891/6498/864/7057/23411/57154/11171/6497/51701/51341/8483/1278/867/130399/7049/7046/1906/1281/56940/1385/50507/2534/678/5654/92/4088/135228/317/7048/114990/91/1399/4090/5829/57669/9372/4087/80310/6868/9110/93649/1398/6885/90/142/65997/10454/677/8754/5747/23089/5139/50515	67
GO:0016197	endosomal transport	58/3204	208/18493	9.60165e-05	0.00333817	0.00266207	23513/9727/57533/10890/23426/51552/8675/9043/54551/7109/7813/57589/9648/22853/10652/1174/84440/8411/9341/22836/84079/8674/55610/25963/11149/8027/6643/8301/81609/51542/9372/2060/29886/200576/400/163486/19/757/8729/10228/23085/7251/169166/51479/4218/392/27131/9527/6653/8938/51028/160622/23274/51209/9559/6272/57706/1203	58
GO:0007254	JNK cascade	59/3204	213/18493	0.000102797	0.00355137	0.00283209	2185/8312/7786/260425/4221/2122/10371/8491/9043/5601/22943/10771/9839/257397/6188/5599/9448/10125/1236/3480/1906/8322/2074/56940/8325/7855/9459/64853/2898/1399/9175/114609/27250/140885/8324/2043/389432/5602/5911/6885/142679/10746/23236/55504/4293/4217/8600/23328/10454/2218/10333/84451/6416/9770/50488/91862/4296/7335/1856	59
GO:0035265	organ growth	55/3204	195/18493	0.000103284	0.00355137	0.00283209	4208/3516/5915/6256/8470/3720/23286/11214/186/9254/6532/2252/10253/340419/7049/7046/1906/9472/596/60485/2261/2475/55841/5781/4211/6781/2066/1432/7048/4087/5573/28514/4153/6789/5292/51548/2099/54796/57493/2254/5728/23493/170302/10611/6416/5600/7161/5747/2539/309/5914/2296/7373/4880/2931	55
GO:0060828	regulation of canonical Wnt signaling pathway	64/3204	236/18493	0.000105817	0.00361859	0.00288569	55182/3516/8312/1654/8452/115908/84445/1456/55366/51366/6934/79960/79718/5494/9096/8321/6657/55031/1601/22943/6659/84133/4040/340419/205147/85407/27031/441478/9978/2309/1453/169200/2487/26585/2719/10146/27123/1432/4088/284654/5218/8324/6789/4300/7090/219771/65981/8323/6424/2254/100113407/4163/53944/9101/83595/10297/27303/55959/130612/23500/1856/23189/2931/4038	64
GO:0007050	cell cycle arrest	65/3204	241/18493	0.000111702	0.00379907	0.00302962	5563/8453/8452/1028/10795/29883/8649/6934/1874/5494/2033/5496/6657/3664/6659/94241/4760/6498/246175/9337/7057/10657/133746/51719/1026/4194/8522/1982/7046/115426/8091/2475/55771/323/8850/100144748/26959/8556/51379/4193/8555/4088/9863/1027/1021/7029/85456/1017/5311/7251/5562/58528/5925/79648/4850/1869/835/5565/339479/84275/53632/7161/25946/9125/8929	65
GO:0030100	regulation of endocytosis	69/3204	260/18493	0.00011947	0.00401959	0.00320548	23513/23327/192683/3673/2042/163/3685/10059/1601/22943/284/6347/5788/57534/867/114781/717/3690/146395/2332/255738/27/29/57118/29904/81/8674/26585/196527/2719/5587/5867/10859/347730/64854/8867/284654/1742/8301/140885/613/6311/5054/9863/558/79872/28514/4153/10103/11037/3949/55680/7251/5869/51479/6424/5728/5291/57030/8976/7097/5582/146722/9829/25999/1813/8862/6456/90678	69
GO:0045926	negative regulation of growth	69/3204	260/18493	0.00011947	0.00401959	0.00320548	1654/23677/10371/3720/23286/5515/79960/9353/3091/2697/4856/4501/604/53335/9792/154/5270/186/23411/694/10512/6532/1026/10505/85407/54910/6405/10201/2100/596/60485/2261/2487/55841/4211/323/26585/3621/2719/51379/4088/7048/91/114609/57556/2045/57142/4153/6789/1027/123879/8482/65981/3394/64061/8835/10509/5728/131566/54825/5600/23251/7161/5747/5467/2539/9423/5753/2931	69
GO:0003279	cardiac septum development	35/3204	109/18493	0.000120219	0.00402317	0.00320833	3516/5915/163/9353/639/8321/10370/6659/51684/10512/9421/7049/7046/27031/23129/60485/7798/54583/7849/10818/4193/7048/23462/5125/8828/6299/90/57493/9794/23493/7468/10454/55636/2625/5914	35
GO:0022037	metencephalon development	34/3204	105/18493	0.000124237	0.0041355	0.00329791	23513/6095/8925/124925/146057/4760/10891/5270/186/8704/2637/2736/429/8455/4040/93986/4009/10978/54910/8322/596/3746/4204/5781/16/340719/28514/6751/23287/1272/136319/1902/2146/2296	34
GO:0071560	cellular response to transforming growth factor beta stimulus	65/3204	242/18493	0.000127286	0.00421458	0.00336097	55553/10979/4208/2908/4221/1028/4093/4053/5494/2033/1601/10370/5138/10891/6498/7057/23411/57154/11171/6497/51701/51341/8483/1278/867/130399/7049/7046/1906/1281/56940/1385/50507/2534/678/5654/92/4088/135228/317/7048/114990/91/1399/4090/5829/57669/9372/4087/80310/6868/9110/93649/1398/6885/90/142/65997/10454/677/8754/5747/23089/5139/50515	65
GO:0006892	post-Golgi vesicle-mediated transport	32/3204	97/18493	0.000131162	0.00432008	0.0034451	288/10890/51552/57120/63971/10564/60412/9341/163882/55435/55614/90196/6102/4644/3996/51542/10067/164/2060/23041/55062/27252/8729/51479/10066/6653/55297/261729/377/10434/6272/29091	32
GO:0016571	histone methylation	41/3204	135/18493	0.000134119	0.00439432	0.00350431	23476/5929/4221/2122/26053/5926/3720/23512/51742/55870/26038/6018/23081/57673/23411/55677/80335/200424/56254/8085/2641/4204/7799/84193/1789/8473/55818/2672/54880/80854/93166/56950/51111/7468/9757/2145/2625/11105/2146/22823/54904	41
GO:0061157	mRNA destabilization	13/3204	26/18493	0.000135243	0.00440807	0.00351527	253943/55147/246175/9698/131405/22849/10236/678/51441/57721/399664/677/4343	13
GO:0002028	regulation of sodium ion transport	29/3204	85/18493	0.000137189	0.00444834	0.00354739	1756/23327/288/5581/154/5270/493/481/57520/4734/483/3799/27347/6330/7402/2745/2040/255738/81/6324/5027/5774/477/7533/1272/81831/6327/1813/79570	29
GO:0031648	protein destabilization	18/3204	43/18493	0.000138431	0.00446548	0.00356106	8452/26224/23291/11236/79139/2033/5347/23411/3064/6048/79577/825/55294/4193/5828/59343/7494/51548	18
GO:0006895	Golgi to endosome transport	10/3204	17/18493	0.000142492	0.00457289	0.00364671	51552/55435/55614/90196/2060/23041/55062/27252/8729/6272	10
GO:0015813	L-glutamate transmembrane transport	12/3204	23/18493	0.000145673	0.00463252	0.00369427	8604/23657/83733/6512/23204/6506/10550/477/6507/57030/3766/55238	12
GO:0009952	anterior/posterior pattern specification	58/3204	211/18493	0.000146744	0.00463252	0.00369427	3212/163589/3516/84678/2033/9096/3217/2186/50937/22943/9839/4760/4762/8092/2637/10512/6497/2294/79728/2736/4041/4040/57534/5087/7046/10655/5090/85407/441478/7855/5080/3219/2719/56983/10818/92/56998/4088/1399/57669/4087/5125/28514/389549/4300/204851/3234/2018/3213/3200/23493/79365/10683/2926/3207/1952/3223/2296	58
GO:0021953	central nervous system neuron differentiation	50/3204	175/18493	0.000147311	0.00463252	0.00369427	6095/10371/6886/8925/9353/8321/1009/22943/9693/6659/7101/9839/26038/51684/8320/2637/2736/429/4040/4009/29777/26468/3400/5080/1453/23314/104/2066/6324/6695/1141/4929/2043/64919/3320/340719/23287/8828/6299/27164/5728/58524/170302/136319/4137/1813/85358/5747/8929/137970	50
GO:1902275	regulation of chromatin organization	50/3204	175/18493	0.000147311	0.00463252	0.00369427	57708/23476/25836/26053/57379/3720/6886/51366/25942/5253/604/9874/10891/3192/54454/23081/23411/55677/6497/5599/3159/56254/2641/2332/4204/11240/1789/5587/8473/55818/2672/6418/7175/4288/11011/54880/93649/80854/51548/25842/9252/55209/144108/9757/9810/2625/23133/23741/22823/54904	50
GO:0048634	regulation of muscle organ development	45/3204	153/18493	0.000149475	0.00467707	0.00372979	55553/4208/3516/6495/79647/3720/50937/22943/4762/57496/7049/7046/1906/9472/596/26263/60485/1385/2475/4211/9975/26585/84466/2066/51804/10818/1432/6198/4088/7048/8324/28514/93649/5292/1655/5562/2254/5728/23493/51460/136319/5600/7161/2539/2931	45
GO:1902305	regulation of sodium ion transmembrane transport	23/3204	62/18493	0.000160436	0.00499506	0.00398338	1756/23327/288/5581/493/481/57520/4734/483/3799/27347/6330/7402/2745/2040/255738/81/6324/5774/477/7533/81831/6327	23
GO:2000736	regulation of stem cell differentiation	24/3204	66/18493	0.000166903	0.00517068	0.00412343	55553/2668/8621/6886/4054/54517/3192/11051/23081/4070/10512/51755/865/81606/678/55818/51441/4005/5156/6774/54940/2625/7161/2296	24
GO:0043507	positive regulation of JUN kinase activity	26/3204	74/18493	0.000174038	0.00536516	0.00427852	2185/7786/9043/22943/9839/6188/1906/8322/2074/8325/7855/9175/2043/389432/6885/142679/10746/4293/4217/8600/23328/10333/84451/6416/4296/1856	26
GO:0002065	columnar/cuboidal epithelial cell differentiation	35/3204	111/18493	0.000179755	0.00551425	0.00439741	23513/8626/3516/5915/6256/4221/639/3091/6659/4760/4610/79955/429/1026/222546/137964/60485/5991/5080/4647/1747/84189/688/9750/5054/9575/28514/1021/23493/654/11078/51057/5914/5753/2931	35
GO:0033044	regulation of chromosome organization	83/3204	330/18493	0.000190223	0.00580692	0.00463081	57708/23476/8452/25836/26053/57379/3720/6886/51366/25942/56984/5514/5253/604/9874/140609/10891/3192/5347/54454/23081/25913/23411/57520/55677/7756/6497/5599/9700/3159/116028/55719/2072/56254/908/2641/2332/51529/4204/11240/2237/1789/5587/10111/8473/55818/2672/996/6418/54464/64282/4171/7175/4288/11011/54880/93649/80854/51548/25842/5594/9252/55209/144108/5925/79648/142/9757/8678/699/9810/3021/4137/84…	83
GO:0048193	Golgi vesicle transport	89/3204	359/18493	0.000194546	0.00591004	0.00471304	55291/288/83394/8452/57533/10890/23259/10802/51552/11236/57120/10945/128637/26153/7109/9871/51762/63971/57410/9648/10652/3064/9950/8774/10564/60412/966/50999/57222/9341/163882/55435/1453/55614/57511/64764/11258/375056/5587/90196/6102/22820/5537/5265/2890/6643/60561/832/23243/51014/4644/3996/51542/10067/164/2060/11345/29886/400/51164/9218/23299/23041/9632/55062/51128/3798/27252/8729/10228/51124/51…	89
GO:0031396	regulation of protein ubiquitination	54/3204	195/18493	0.000198754	0.00600869	0.00479171	8312/8452/2729/11236/51366/9532/79139/5601/6659/5581/154/5347/284/6188/7046/56254/91947/6502/151636/2475/7332/2534/7321/55294/7375/8473/54765/8555/10625/59343/54602/3320/9709/123879/85453/285671/9529/84930/9683/10210/5728/7337/165324/3984/23328/339745/55208/9810/84101/5582/23251/23640/23142/2931	54
GO:0086010	membrane depolarization during action potential	16/3204	37/18493	0.000205006	0.00614373	0.0048994	288/6330/6334/11280/3759/6326/8913/6324/776/5774/477/775/7533/6328/6323/6327	16
GO:0010452	histone H3-K36 methylation	8/3204	12/18493	0.000205184	0.00614373	0.0048994	23476/55870/55677/84193/54880/56950/7468/54904	8
GO:0018210	peptidyl-threonine modification	36/3204	116/18493	0.000208522	0.00618553	0.00493273	8312/7786/1456/146057/3093/5347/7443/51701/22853/57214/27347/51719/10253/5599/7046/2589/596/2641/2475/1859/1453/1116/5587/9943/7224/7048/91/7225/85456/90/5594/114805/53944/815/442117/2931	36
GO:0010810	regulation of cell-substrate adhesion	57/3204	209/18493	0.000208556	0.00618553	0.00493273	2244/8874/4811/2185/4221/2042/604/342184/5581/7057/4070/2294/780/10562/9448/1236/7402/340485/23122/8322/56940/596/55435/6239/51144/81/2243/26585/6695/4323/4088/1399/55604/395/285/57669/5921/84034/8324/5054/1398/1021/133584/64094/5728/5291/3037/11078/51057/2335/2192/50488/22998/5747/10630/23189/4814	57
GO:0060071	Wnt signaling pathway planar cell polarity pathway	23/3204	63/18493	0.00021166	0.00624798	0.00498253	115908/163/1173/8321/1601/22943/57154/84133/7976/85407/27031/8322/166336/7855/2719/23002/8324/9863/4300/81839/8323/1952/1856	23
GO:0007605	sensory perception of sound	42/3204	142/18493	0.000213316	0.00626727	0.00499792	2070/283310/6495/25836/26018/84530/836/80204/491/2561/57214/79955/10253/8322/113278/9860/5077/5205/3815/9455/4647/53942/776/1141/84189/4646/9750/56914/7399/6507/1285/89797/55084/2917/9948/11078/140469/9132/55636/79784/3784/7068	42
GO:0034446	substrate adhesion-dependent cell spreading	29/3204	87/18493	0.000217186	0.00635118	0.00506484	2244/10979/8874/3685/4070/10562/3690/8322/9341/55435/6239/81/2243/11149/1399/55604/23380/8324/558/1398/3037/11078/84168/2335/2192/7301/5747/10630/23189	29
GO:1903792	negative regulation of anion transport	13/3204	27/18493	0.000219588	0.00638923	0.00509518	57120/7057/186/27347/8529/8660/5593/2475/2564/22925/10550/6424/2917	13
GO:1901861	regulation of muscle tissue development	44/3204	151/18493	0.000221452	0.00638923	0.00509518	55553/4208/3516/6495/79647/3720/50937/22943/10891/57496/7049/7046/1906/9472/596/26263/60485/1385/2475/4211/9975/26585/84466/2066/51804/10818/1432/6198/4088/7048/8324/28514/93649/5292/1655/5562/2254/5728/23493/136319/5600/7161/2539/2931	44
GO:0001736	establishment of planar polarity	27/3204	79/18493	0.000222572	0.00638923	0.00509518	8626/115908/163/1173/8321/1601/22943/57154/84133/7976/85407/27031/8322/166336/7855/2719/23002/8324/9863/4300/81839/8323/9948/2295/23245/1952/1856	27
GO:0007164	establishment of tissue polarity	27/3204	79/18493	0.000222572	0.00638923	0.00509518	8626/115908/163/1173/8321/1601/22943/57154/84133/7976/85407/27031/8322/166336/7855/2719/23002/8324/9863/4300/81839/8323/9948/2295/23245/1952/1856	27
GO:0051403	stress-activated MAPK cascade	73/3204	284/18493	0.000224555	0.00640823	0.00511033	2185/8312/7786/260425/4221/2122/10371/23291/8491/1326/9043/5601/22943/10771/9839/257397/6188/5599/9448/10125/1236/3480/1906/392255/355/54910/8322/2074/56940/8325/7855/9459/4215/64853/2898/1432/6500/1399/9175/114609/27250/140885/8324/2043/10550/389432/5602/5911/6885/142679/5594/10746/23236/55504/4293/4217/8600/23328/10454/2218/677/10333/7498/84451/6416/768211/5600/9770/50488/91862/4296/7335/1856	73
GO:0001505	regulation of neurotransmitter levels	86/3204	346/18493	0.000225281	0.00640823	0.00511033	23513/4208/2185/1129/5908/6095/9314/2668/9515/10059/27445/493/9699/186/2643/23657/10249/6532/116443/275/114781/1906/747/6809/384/121278/81539/2332/1806/341359/2475/3177/10814/6512/23204/10003/6581/22930/26059/2901/6506/7166/1644/776/3356/4088/1141/6530/9152/7915/5027/8867/9378/140885/10550/26258/3320/114088/477/6857/4128/3176/285671/6507/55607/5311/112476/57030/3766/51248/8938/7097/10333/5582/685…	86
GO:0010770	positive regulation of cell morphogenesis involved in differentiation	43/3204	147/18493	0.000236411	0.00666424	0.00531448	23394/2244/8874/9353/10059/9839/6498/26039/10562/22902/4803/23129/10154/7804/6239/22906/29904/84079/2243/7224/57698/1399/55604/9175/2043/1398/4076/6387/8482/8997/79791/65981/4131/3037/3984/26259/11078/4137/2335/4804/5649/9423/23654	43
GO:0030902	hindbrain development	43/3204	147/18493	0.000236411	0.00666424	0.00531448	23513/3212/6095/84678/8925/124925/146057/4760/10891/5270/2020/186/8704/2637/2736/6532/429/8455/4040/93986/4009/10978/54910/8322/596/3746/4204/5781/200894/16/728/340719/28514/6751/23287/1272/3213/30837/136319/1902/2146/2296/8929	43
GO:0046488	phosphatidylinositol metabolic process	62/3204	233/18493	0.000237486	0.00666452	0.00531471	83394/51552/285172/9306/8817/2252/942/5277/9846/8660/84725/8651/9655/2261/8897/4952/2534/27124/8395/5781/5286/11145/5867/9365/2066/3815/81579/10818/22979/3356/8867/5281/22908/3667/376497/200576/2246/9110/79887/5156/2099/2549/5322/94005/23236/8835/79837/253558/2254/5728/5291/30837/65977/10026/1040/2322/377/9807/128869/10380/145567/23049	62
GO:0000186	activation of MAPKK activity	20/3204	52/18493	0.00024051	0.00668938	0.00533453	7786/8649/1326/7046/4803/2074/4214/4215/57498/10818/1399/9175/1398/6885/10746/4293/4217/8754/84451/4296	20
GO:1990089	response to nerve growth factor	20/3204	52/18493	0.00024051	0.00668938	0.00533453	3747/9693/867/4803/3746/1385/2309/1453/66000/29904/57498/9863/1398/5728/1783/1869/9101/4137/6456/6272	20
GO:0031146	SCF-dependent proteasomal ubiquitin-dependent protein catabolic process	17/3204	41/18493	0.00024242	0.00671266	0.0053531	26224/23291/146330/54850/899/6502/25827/9978/55294/6500/26268/26235/79791/6815/64839/26234/554251	17
GO:0006479	protein methylation	49/3204	174/18493	0.000249072	0.0068222	0.00544045	23476/5929/4221/2122/26053/5926/3720/23512/79609/51742/55870/25940/26038/6018/23081/57673/23411/80204/55677/80335/200424/56254/8085/2641/55251/3662/4204/7799/115294/84193/1789/151194/8473/55818/2672/2107/54880/80854/93166/56950/51111/7468/9757/2145/2625/11105/2146/22823/54904	49
GO:0008213	protein alkylation	49/3204	174/18493	0.000249072	0.0068222	0.00544045	23476/5929/4221/2122/26053/5926/3720/23512/79609/51742/55870/25940/26038/6018/23081/57673/23411/80204/55677/80335/200424/56254/8085/2641/55251/3662/4204/7799/115294/84193/1789/151194/8473/55818/2672/2107/54880/80854/93166/56950/51111/7468/9757/2145/2625/11105/2146/22823/54904	49
GO:0032147	activation of protein kinase activity	81/3204	323/18493	0.000249646	0.0068222	0.00544045	23394/2185/8312/7786/8491/8649/1326/10920/9043/154/7057/284/7852/257397/5788/114882/27347/51719/9448/7046/3690/4803/2074/4214/8651/51765/2475/255324/1116/4215/5781/57498/26585/56034/3815/9943/8428/10818/55704/1432/7048/57144/1399/51196/5027/9175/151/8797/114609/728/5573/2246/1398/5602/6789/6352/6885/142679/56924/5594/10746/5562/4293/5291/4217/80829/8600/727/10454/8754/10333/84451/6416/1902/6464/5…	81
GO:0007638	mechanosensory behavior	9/3204	15/18493	0.000254202	0.00687367	0.0054815	55342/4762/3064/93986/84189/9378/6507/1813/85358	9
GO:2001224	positive regulation of neuron migration	9/3204	15/18493	0.000254202	0.00687367	0.0054815	25836/10371/9693/23060/57698/57556/79791/5649/26012	9
GO:0001657	ureteric bud development	31/3204	96/18493	0.000255923	0.00687367	0.0054815	5915/6495/2668/55366/9353/3217/342184/4072/186/4070/30812/6943/5087/384/596/26585/2719/51804/7849/56998/4088/4090/4087/2246/6299/5311/2625/3207/8642/5914/2296	31
GO:0021549	cerebellum development	31/3204	96/18493	0.000255923	0.00687367	0.0054815	6095/8925/124925/146057/4760/10891/5270/186/8704/2637/2736/8455/4040/93986/4009/10978/54910/8322/3746/4204/5781/16/340719/28514/6751/23287/1272/136319/1902/2146/2296	31
GO:0031345	negative regulation of cell projection organization	50/3204	179/18493	0.00026806	0.00716889	0.00571693	1400/10371/9353/50807/53335/9693/4070/4117/10512/112/10253/9448/10505/22902/57489/54910/6405/9860/2534/27124/6695/2672/7224/4193/832/57556/7225/2043/5793/2045/57142/7533/8482/9529/79598/10509/4134/5728/84894/1902/56963/4804/23251/1949/5747/9423/23189/152559/348110/4038	50
GO:0001892	embryonic placenta development	29/3204	88/18493	0.000270968	0.00721583	0.00575436	3516/1028/639/3091/2186/430/79977/8320/9421/4188/7855/7942/54583/8648/9394/59343/23462/6789/57448/5594/79805/5311/841/23493/26259/677/6615/57623/10049	29
GO:0048483	autonomic nervous system development	18/3204	45/18493	0.000275019	0.00725161	0.00578289	8626/3212/6495/10371/2668/6659/26153/2637/30812/429/7412/7976/6405/104/8828/89797/2625/8929	18
GO:0030198	extracellular matrix organization	86/3204	348/18493	0.000276035	0.00725161	0.00578289	2244/4811/1288/8728/58494/3673/871/3685/1305/3381/1463/7101/10266/7057/23768/2294/780/4982/102/7412/1404/1634/1278/7046/3690/1281/23122/255631/7133/1290/56605/3696/91522/1803/51144/3818/960/323/2243/26585/7092/1520/6678/1513/4323/5654/4088/4325/149371/83716/6624/4015/5054/4358/1515/133584/1462/3038/8038/5156/3691/1285/64094/1289/9644/55790/3037/342371/5925/2295/8076/84168/2683/79709/2335/2192/140…	86
GO:0042147	retrograde transport endosome to Golgi	28/3204	84/18493	0.000276806	0.00725161	0.00578289	57533/8675/9043/54551/7109/7813/57589/9648/10652/1174/9341/22836/25963/6643/51542/29886/200576/400/8729/10228/23085/51479/27131/9527/8938/51209/9559/1203	28
GO:0003013	circulatory system process	117/3204	500/18493	0.000276947	0.00725161	0.00578289	1756/2244/3212/23327/1129/10371/2313/2729/1874/9353/3363/5144/2697/10059/185/11214/5138/154/10052/493/10266/481/186/284/2643/491/10135/70/112/6532/4041/27347/9732/6330/8529/1278/444/1906/155/8509/83988/3759/3269/50507/2475/8913/2534/29/4204/2028/552/5286/8654/2243/5350/1824/6781/6324/490/6547/11149/4193/3709/776/56998/3356/4088/4090/10142/3775/151/613/116/5125/388591/255061/28514/477/6387/775/298…	117
GO:0030201	heparan sulfate proteoglycan metabolic process	14/3204	31/18493	0.000293826	0.00766151	0.00610978	26035/90161/6934/222537/8509/9953/2135/10855/266722/9394/92370/55790/2137/55959	14
GO:0051146	striated muscle cell differentiation	71/3204	277/18493	0.000296701	0.00770438	0.00614396	55553/1756/4208/3516/5915/29767/6256/7504/8470/9043/4856/50937/11214/85461/836/22943/3192/186/3845/70/6497/8289/9254/1906/55909/9472/596/26263/50507/2475/552/825/26585/11155/51804/11149/10818/1432/4323/71/7111/9750/8324/5573/28514/93649/7494/6443/8038/5156/90/1073/5925/9794/9948/23493/79365/10611/577/136319/6416/4205/1760/50804/2146/23135/3756/2539/5914/6272/2931	71
GO:0032386	regulation of intracellular transport	101/3204	422/18493	0.000303032	0.00783626	0.00624913	9530/1129/288/5908/4659/11236/23286/51366/6934/5494/9515/54439/10059/9972/1601/51496/5138/5962/7545/51684/128637/9699/186/23411/10657/116150/284/4734/55677/2294/9648/3799/57214/116443/22902/9846/55432/4067/258010/2040/2332/51277/55754/255738/7855/7332/2534/7323/10814/11052/57102/5781/5350/22930/55294/11149/2901/1432/5174/4193/60561/776/65055/10956/9847/3356/4088/1141/55696/10178/9777/51715/23144/…	101
GO:0001659	temperature homeostasis	48/3204	171/18493	0.0003107	0.00800148	0.00638089	3516/55366/64641/5733/2697/3600/2778/5746/10891/154/2887/7852/3480/9658/155/6319/2628/3662/56034/23228/4857/8473/55818/7030/79071/23090/3356/8809/116/376497/6868/7090/51548/6774/9572/1240/5925/7067/8600/5565/9807/1813/8862/23135/133522/51087/8929/3934	48
GO:0072163	mesonephric epithelium development	31/3204	97/18493	0.000314522	0.0080338	0.00640666	5915/6495/2668/55366/9353/3217/342184/4072/186/4070/30812/6943/5087/384/596/26585/2719/51804/7849/56998/4088/4090/4087/2246/6299/5311/2625/3207/8642/5914/2296	31
GO:0072164	mesonephric tubule development	31/3204	97/18493	0.000314522	0.0080338	0.00640666	5915/6495/2668/55366/9353/3217/342184/4072/186/4070/30812/6943/5087/384/596/26585/2719/51804/7849/56998/4088/4090/4087/2246/6299/5311/2625/3207/8642/5914/2296	31
GO:0048588	developmental cell growth	60/3204	226/18493	0.000316429	0.00804964	0.0064193	23394/23327/26053/10371/8470/9353/11214/53335/134430/9839/9699/186/57154/10512/780/26999/10505/22902/1906/4803/54910/8085/9472/6405/2475/65059/66000/214/7224/23769/57698/4692/7048/9175/57556/84298/3320/2045/57142/6387/6857/51548/8482/10439/8828/10509/1808/4131/3984/4897/10611/6416/4137/2335/84258/23025/2539/9423/6456/2931	60
GO:0016202	regulation of striated muscle tissue development	43/3204	149/18493	0.000326466	0.00827136	0.00659611	55553/4208/3516/6495/79647/3720/50937/22943/57496/7049/7046/1906/9472/596/26263/60485/1385/2475/4211/9975/26585/84466/2066/51804/10818/1432/6198/4088/7048/8324/28514/93649/5292/1655/5562/2254/5728/23493/136319/5600/7161/2539/2931	43
GO:0014706	striated muscle tissue development	92/3204	379/18493	0.000332739	0.0083963	0.00669574	55553/3131/4208/3516/5915/6495/6256/79647/7504/8470/3720/2033/50937/11214/22943/3192/10052/8320/186/70/10512/6497/57496/8289/30812/6943/9421/1634/93986/7049/7046/1906/55909/9472/596/26263/60485/1385/50507/2475/4211/9975/26585/5350/84466/2066/51804/11149/54583/10818/1432/2317/6198/4088/7048/688/9750/8324/5573/28514/93649/5292/51548/6443/5156/56261/90/1655/1073/5562/57493/2254/5728/6840/5925/6262/9…	92
GO:0003205	cardiac chamber development	47/3204	167/18493	0.000334308	0.00840202	0.0067003	4208/3516/5915/6256/163/9353/639/3091/8321/10370/6659/51684/79977/10512/2294/8289/9421/7049/7046/27031/23129/60485/7798/54583/7849/10818/4193/7048/23462/5125/93649/8828/6299/90/57493/6262/9794/23493/7468/6654/157378/10454/55636/2625/5914/2296/2931	47
GO:0009791	post-embryonic development	29/3204	89/18493	0.000336241	0.00841678	0.00671208	55553/9314/639/2778/55870/25976/10512/5326/93986/7046/596/27161/2475/7855/10765/4204/3658/4647/4692/4929/7915/4087/64919/84159/3708/57493/2625/50515/4880	29
GO:0072006	nephron development	40/3204	136/18493	0.000338364	0.00841919	0.00671399	4208/4811/6495/2668/55366/3217/342184/186/284/4070/30812/6943/5087/596/2028/26585/2719/282679/51804/26249/7849/56998/51196/285/80310/9863/2246/28514/4358/5156/6299/5311/1285/5420/2625/3207/8642/947/55959/2296	40
GO:0043010	camera-type eye development	76/3204	302/18493	0.000339921	0.00841919	0.00671399	56853/2820/25932/6256/9314/84678/1028/4286/3091/2823/50937/7101/9839/4760/6498/493/79977/128637/1543/6497/23657/8289/4041/30812/84465/23093/4040/22899/1641/93986/7046/84440/8322/3985/157506/25945/7855/5080/10765/5818/55714/4211/22930/26146/490/10818/4088/7048/84189/114789/220/1181/7111/57010/64919/130557/28514/204851/775/5156/86/10210/5316/57030/835/2295/6654/6096/51057/55636/2625/7068/4814/5914/…	76
GO:0002066	columnar/cuboidal epithelial cell development	21/3204	57/18493	0.000340373	0.00841919	0.00671399	23513/5915/639/3091/79955/1026/137964/5991/5080/4647/84189/688/9750/9575/28514/1021/654/11078/51057/5914/2931	21
GO:0000381	regulation of alternative mRNA splicing via spliceosome	23/3204	65/18493	0.000358895	0.00875764	0.0069839	55796/56853/10921/60680/10181/4154/10179/84530/6434/3192/6429/10657/51341/11189/2332/140890/1859/6431/54715/58517/1655/5936/9967	23
GO:0014823	response to activity	23/3204	65/18493	0.000358895	0.00875764	0.0069839	5563/3673/2729/3091/3329/10891/867/1906/121278/1385/2475/3658/825/1789/114789/285/5562/5728/6262/654/53632/5467/23135	23
GO:0090175	regulation of establishment of planar polarity	23/3204	65/18493	0.000358895	0.00875764	0.0069839	115908/163/1173/8321/1601/22943/57154/84133/7976/85407/27031/8322/166336/7855/2719/23002/8324/9863/4300/81839/8323/1952/1856	23
GO:0050796	regulation of insulin secretion	48/3204	172/18493	0.000359654	0.00875764	0.0069839	2044/3747/6934/3091/9515/4856/6659/4760/5581/415116/5208/291/9254/3799/4041/9448/130399/222546/8660/2641/5991/777/84522/252983/1803/5781/57555/11069/3709/776/3667/9575/6352/23435/775/3790/1374/6566/55638/9572/3708/8938/23568/2693/1813/5467/4826/90550	48
GO:0007612	learning	41/3204	141/18493	0.000373584	0.0090266	0.00719838	23259/25769/3091/4212/85461/27020/22943/3845/8704/23657/3064/10882/93986/6529/1385/3269/2475/2534/4204/3815/6547/5896/1141/55236/57144/8867/1742/9378/10396/477/57468/8997/2915/342371/22941/577/7097/84502/1813/85358/5649	41
GO:0045807	positive regulation of endocytosis	41/3204	141/18493	0.000373584	0.0090266	0.00719838	23327/3673/163/3685/10059/1601/284/6347/5788/57534/867/717/2332/255738/29/57118/29904/81/26585/196527/2719/8867/8301/140885/613/5054/9863/558/79872/28514/4153/10103/3949/7251/51479/6424/8976/146722/25999/1813/8862	41
GO:0043631	RNA polyadenylation	18/3204	46/18493	0.000379287	0.00912914	0.00728015	22828/10914/123169/11051/64506/10978/56254/79577/22849/11052/11044/64282/55339/23144/1479/56903/9810/2926	18
GO:0030010	establishment of cell polarity	38/3204	128/18493	0.000383602	0.00919764	0.00733478	23513/2185/5908/10890/23286/154796/889/154810/10090/2294/3064/10253/4752/23150/1236/22902/137886/5080/57698/3996/9750/81609/64398/23616/6624/3320/8729/4131/4134/7465/9826/79648/51057/2625/5747/6993/23189/55691	38
GO:0015012	heparan sulfate proteoglycan biosynthetic process	12/3204	25/18493	0.000397996	0.00950632	0.00758094	26035/90161/6934/222537/8509/9953/2135/266722/9394/92370/55790/2137	12
GO:0035601	protein deacylation	34/3204	111/18493	0.000404232	0.00959215	0.00764939	1107/5563/57708/10933/25836/5926/51742/79718/25942/2033/604/23411/6497/5599/4752/56916/1108/56271/11176/1859/5587/10129/2005/51104/58489/51548/6299/5562/84312/138151/51317/4137/10434/5928	34
GO:0043543	protein acylation	63/3204	242/18493	0.000404654	0.00959215	0.00764939	8295/79612/5563/10933/9425/26053/51201/79960/5494/25942/2033/6659/10891/26038/23338/80314/57673/23411/55677/5495/6877/9329/7994/51200/5977/1743/122830/51616/3662/284058/4191/79929/4204/80218/80155/8850/9397/8473/8648/6418/55683/157570/51104/58489/51114/9575/93649/6885/9027/114799/79683/86/9252/55209/5562/26122/27097/4137/2625/25999/29801/23741/55689	63
GO:0035249	synaptic transmission glutamatergic	29/3204	90/18493	0.000415045	0.0097731	0.00779369	2891/4208/2185/1006/22943/2894/5270/8029/57555/22930/2898/2901/3356/9378/116/2900/6509/477/6857/2915/22941/2917/57030/23025/1813/85358/2916/10497/5649	29
GO:0030323	respiratory tube development	48/3204	173/18493	0.000415411	0.0097731	0.00779369	3516/5241/2033/79977/171023/3845/8817/23657/2294/2736/429/6943/2252/10253/340419/93986/27031/157506/60485/1385/9678/1116/55294/2719/6431/6678/4323/55036/7048/9394/4087/83716/5125/4015/2246/64399/93649/5156/5594/9231/57493/2254/342371/7067/51696/10454/10630/7068	48
GO:0030178	negative regulation of Wnt signaling pathway	46/3204	164/18493	0.000417125	0.00977666	0.00779653	8312/8452/115908/84445/6934/10042/79960/9096/8321/6657/80319/1601/22943/2887/51701/84133/4040/4188/85407/27031/9978/2309/169200/2487/26585/2719/10146/27123/1432/56998/54894/387914/6789/4300/7090/8323/6424/2254/100113407/4163/147495/10297/27303/1856/2931/4038	46
GO:0106106	cold-induced thermogenesis	41/3204	142/18493	0.000438644	0.0102046	0.00813778	3516/55366/64641/2697/3600/2778/5746/10891/154/2887/7852/3480/9658/155/6319/2628/3662/56034/23228/4857/8473/55818/7030/79071/23090/8809/116/6868/7090/51548/9572/1240/5925/7067/5565/9807/23135/133522/51087/8929/3934	41
GO:0120161	regulation of cold-induced thermogenesis	41/3204	142/18493	0.000438644	0.0102046	0.00813778	3516/55366/64641/2697/3600/2778/5746/10891/154/2887/7852/3480/9658/155/6319/2628/3662/56034/23228/4857/8473/55818/7030/79071/23090/8809/116/6868/7090/51548/9572/1240/5925/7067/5565/9807/23135/133522/51087/8929/3934	41
GO:0008344	adult locomotory behavior	26/3204	78/18493	0.000450268	0.0103726	0.00827179	10752/2668/4864/124925/7545/2743/8029/9698/114781/5090/4204/4929/84189/7111/2043/477/6387/8997/6323/1267/58524/3766/55636/1813/127343/1949	26
GO:0031223	auditory behavior	8/3204	13/18493	0.000452251	0.0103726	0.00827179	4762/3064/93986/84189/9378/6507/1813/85358	8
GO:0060123	regulation of growth hormone secretion	8/3204	13/18493	0.000452251	0.0103726	0.00827179	8874/5781/116/51714/8997/2693/55636/1813	8
GO:0006417	regulation of translation	96/3204	402/18493	0.000456411	0.0103726	0.00827179	2185/56853/1654/1975/6256/10492/3673/29883/11236/23369/54517/56478/253943/55147/6659/56648/246175/9337/7057/10657/8087/6188/9698/79072/5813/6895/64506/7072/1982/1612/10644/10642/285367/10643/131405/2332/89978/55095/10140/84541/27161/2475/285381/2309/1974/22849/3658/27102/100132911/10236/387338/678/51611/6198/54464/8507/51441/1983/1979/16/6311/7175/2107/340719/26523/4076/6352/51091/9728/51714/6197…	96
GO:0048857	neural nucleus development	22/3204	62/18493	0.000457142	0.0103726	0.00827179	7707/23513/3212/3747/522/429/59345/93986/596/3746/11240/10971/1141/220/60/7533/2254/1267/170302/2539/6271/8929	22
GO:0010038	response to metal ion	87/3204	358/18493	0.000457348	0.0103726	0.00827179	10243/2244/5563/4208/2185/23327/288/25932/10235/8604/3747/2729/4864/5515/3091/4501/836/5601/10891/387758/1543/7057/4734/7782/4982/429/7412/5599/1906/29957/4891/4968/6529/596/3746/121278/1385/341359/8913/79800/113/3658/29904/825/2243/5350/3815/6678/64924/4193/200894/4520/664/5027/1742/3736/6898/144402/1740/1027/6857/3778/5066/254428/5594/5311/5741/6263/5562/5728/841/6262/30061/142/654/8678/8754/42…	87
GO:0021954	central nervous system neuron development	25/3204	74/18493	0.000457469	0.0103726	0.00827179	10371/9353/1009/9693/7101/9839/2637/2736/429/26468/104/6324/1141/4929/2043/3320/340719/8828/27164/5728/170302/4137/1813/5747/8929	25
GO:0035264	multicellular organism growth	42/3204	147/18493	0.000478799	0.0108171	0.0086262	5915/2820/25932/25836/1028/6776/5930/79718/5144/55777/2778/154/79977/9254/79728/8455/6895/2074/137964/596/1385/2475/5781/104/6506/84189/114789/84159/57578/57468/6774/8835/57493/6654/677/2693/3021/55636/1813/5914/4880/2593	42
GO:0048706	embryonic skeletal system development	37/3204	125/18493	0.0004839	0.0108729	0.00867077	4208/3212/6495/25836/23169/3217/2778/79977/860/8092/57453/54799/5087/7046/10655/4188/5396/3231/157506/3219/23314/51804/4323/92/4088/4325/7048/4087/5125/5156/3213/3200/2254/3207/3223/55959/50515	37
GO:0098732	macromolecule deacylation	34/3204	112/18493	0.000485207	0.0108729	0.00867077	1107/5563/57708/10933/25836/5926/51742/79718/25942/2033/604/23411/6497/5599/4752/56916/1108/56271/11176/1859/5587/10129/2005/51104/58489/51548/6299/5562/84312/138151/51317/4137/10434/5928	34
GO:1990823	response to leukemia inhibitory factor	30/3204	95/18493	0.000489433	0.0108729	0.00867077	9314/3720/3192/23411/51444/10253/64137/54956/5277/8731/8322/1385/8467/5080/1974/10765/11240/64841/55818/3099/688/9227/6751/7494/84159/8828/165324/8600/7037/22823	30
GO:1990830	cellular response to leukemia inhibitory factor	30/3204	95/18493	0.000489433	0.0108729	0.00867077	9314/3720/3192/23411/51444/10253/64137/54956/5277/8731/8322/1385/8467/5080/1974/10765/11240/64841/55818/3099/688/9227/6751/7494/84159/8828/165324/8600/7037/22823	30
GO:0030033	microvillus assembly	9/3204	16/18493	0.000491697	0.0108729	0.00867077	9693/5962/51765/5205/688/6624/5337/5911/5420	9
GO:0071786	endoplasmic reticulum tubular network organization	9/3204	16/18493	0.000491697	0.0108729	0.00867077	10890/25782/23204/22930/64225/65055/80856/57142/25923	9
GO:0051098	regulation of binding	89/3204	369/18493	0.000514183	0.0113038	0.00901439	4792/23394/8874/4208/6612/9314/4221/25836/3673/1400/115908/6934/9532/79139/5515/25942/64641/2033/146057/50937/1601/22943/9693/4760/154/5347/284/6497/51341/9421/5599/7049/7046/4188/4803/79822/2072/8932/5899/23129/8091/596/2641/2332/151636/3400/255738/285381/3662/64853/5350/55294/23228/56998/4088/59343/23462/60/57669/9750/114609/4087/51042/2043/2035/9709/93649/1398/6789/65981/6815/22927/3200/5925/1…	89
GO:1902807	negative regulation of cell cycle G1/S phase transition	36/3204	121/18493	0.000514796	0.0113038	0.00901439	9314/4221/29883/1874/79960/2033/6659/246175/9337/6118/6347/1026/4194/596/79577/10217/4193/1027/123879/7029/79791/85456/1017/5311/5728/7465/5925/138151/4850/1869/835/56241/2146/25946/79027/9125	36
GO:0001701	in utero embryonic development	77/3204	311/18493	0.000526829	0.0115276	0.00919285	55553/3516/6256/8452/1028/7763/5930/154796/4154/639/25942/3091/2186/430/6498/79977/23081/8320/284/9817/8178/9871/2294/79728/2736/102/8029/30812/57534/9421/7046/1906/4188/157506/7855/4952/2551/8894/57498/54700/7942/54583/8648/4088/7048/91/9394/59343/23462/57669/4087/6789/26115/1825/5156/9470/57448/90/5594/79805/5311/57493/841/1603/23493/727/10454/26259/677/55636/2625/6615/57623/9915/25988/2296/100…	77
GO:1903320	regulation of protein modification by small protein conjugation or removal	58/3204	221/18493	0.000539982	0.0117017	0.0093317	8312/8452/2729/11236/51366/9532/79139/10401/5601/6659/5581/154/5347/284/6188/7046/56254/91947/6502/151636/2475/7332/2534/7321/825/55294/7375/8473/54765/8555/10625/59343/54602/3320/9709/123879/85453/285671/9529/54472/84930/9683/10210/5728/7337/165324/3984/23328/339745/55208/9810/84101/5582/10318/23251/23640/23142/2931	58
GO:0051963	regulation of synapse assembly	32/3204	104/18493	0.000540043	0.0117017	0.0093317	23394/4208/139065/6495/347902/8321/23768/5818/4204/29904/57555/386724/22865/51804/347730/23769/1141/84189/9378/2045/26050/7336/3556/55607/9231/10611/577/7097/2693/5747/9423/22859	32
GO:0046328	regulation of JNK cascade	50/3204	184/18493	0.000540396	0.0117017	0.0093317	2185/8312/7786/260425/4221/2122/10371/9043/22943/10771/9839/6188/9448/10125/1236/3480/1906/8322/2074/56940/8325/7855/64853/2898/9175/114609/27250/140885/8324/2043/389432/5911/6885/142679/10746/23236/55504/4293/4217/8600/23328/2218/10333/84451/6416/9770/50488/91862/4296/1856	50
GO:0014855	striated muscle cell proliferation	26/3204	79/18493	0.000561969	0.0121269	0.00967076	4208/3516/6495/6256/79647/3720/284/7049/7046/60485/4211/84466/2066/1432/7048/5573/5292/6774/2254/5728/23493/5600/7161/5467/2296/147912	26
GO:0055017	cardiac muscle tissue growth	31/3204	100/18493	0.000567858	0.0121934	0.00972378	4208/3516/6256/8470/3720/11214/186/7049/7046/1906/9472/60485/2475/4211/2066/1432/7048/5573/5292/51548/57493/2254/5728/23493/10611/6416/5600/7161/2539/2296/2931	31
GO:0070936	protein K48-linked ubiquitination	20/3204	55/18493	0.000568947	0.0121934	0.00972378	10299/23327/7325/29089/51366/3093/7326/997/6048/6502/151636/7323/7321/92912/26249/54765/54476/80196/10210/7337	20
GO:0003231	cardiac ventricle development	37/3204	126/18493	0.000572466	0.0122269	0.00975053	4208/3516/6256/163/9353/639/3091/8321/10370/6659/51684/79977/10512/2294/9421/7049/7046/60485/7798/54583/7849/10818/4193/7048/23462/93649/6299/90/57493/6262/23493/7468/157378/55636/2625/2296/2931	37
GO:0000380	alternative mRNA splicing via spliceosome	25/3204	75/18493	0.000574726	0.0122335	0.00975573	55796/56853/10921/60680/8621/10181/4154/10179/84530/6434/3192/6429/10657/51341/11189/2332/140890/1859/6431/54715/10569/58517/1655/5936/9967	25
GO:0045787	positive regulation of cell cycle	93/3204	390/18493	0.000583529	0.0123787	0.00987158	1654/23476/7325/8452/25836/10795/29883/6886/1874/25942/2033/5514/4212/10370/6659/7101/5962/3192/5581/246175/1543/9337/4762/54617/5586/55023/6532/4041/429/4040/1026/4194/54619/5087/9700/1906/55719/993/137886/84440/115426/153241/899/8091/79577/51529/252983/255324/894/4204/5781/643/2237/151195/51379/4193/6198/5890/7175/284071/1027/7029/219771/8444/85456/1017/5311/23236/64094/29127/6840/54627/5925/48…	93
GO:0099175	regulation of postsynapse organization	30/3204	96/18493	0.000595575	0.0125916	0.0100413	23613/10059/23657/102/6405/26037/7804/2534/29904/54583/347730/51104/58489/9378/2043/2045/4076/8997/65981/3556/8828/55607/5728/4897/10611/2693/85358/5649/4038/9762	30
GO:1901653	cellular response to peptide	86/3204	356/18493	0.000599977	0.0126419	0.0100815	5908/9314/4221/10890/6776/2729/6667/185/55777/526/154/2887/186/23411/10135/51762/9550/6599/112/114882/55023/64506/3480/1906/8660/90933/8651/4067/2641/1385/255738/5771/2309/2534/252983/113/5781/5286/29904/8850/9365/8473/4193/6198/9847/4929/1176/5829/4644/688/782/1979/3667/64397/2043/5573/1398/54328/7494/2915/2549/8462/6774/8835/4218/5728/30837/528/143686/142/5140/6654/677/10333/84275/2693/6464/210…	86
GO:0048705	skeletal system morphogenesis	61/3204	236/18493	0.00060384	0.0126806	0.0101123	4208/3212/5915/6495/25836/7763/871/3217/1305/2778/342184/79977/25976/4762/860/8092/8817/6497/4041/57453/4040/7046/4188/5396/157506/4664/2261/23314/26585/6781/51804/1432/4323/4088/4325/7048/5027/51715/56914/4087/158326/64399/4153/84159/5156/3234/3213/3200/6424/55790/3037/7067/654/3207/133522/309/5914/50515/2296/7373/4880	61
GO:0018107	peptidyl-threonine phosphorylation	33/3204	109/18493	0.0006145	0.0128613	0.0102564	8312/7786/1456/146057/3093/5347/7443/51701/22853/57214/27347/51719/10253/5599/7046/596/2641/2475/1859/1453/1116/5587/9943/7224/7048/91/7225/85456/90/5594/53944/815/2931	33
GO:0016236	macroautophagy	70/3204	279/18493	0.00062283	0.0128715	0.0102645	5563/57231/57533/10558/4864/8649/3091/836/526/94241/154/23411/57154/4734/9550/23001/3064/60412/5599/1634/83734/3920/140775/6048/137886/55432/25782/5899/8897/2475/22930/8027/167410/5049/664/9517/51715/149371/23710/11345/200576/22863/7416/6885/55062/23673/55054/79443/7251/5562/58528/79837/27131/55102/165324/528/143686/8678/5565/54543/51028/23400/23130/23274/53632/23367/58476/9559/90678/665	70
GO:0001958	endochondral ossification	12/3204	26/18493	0.000623212	0.0128715	0.0102645	4208/1305/2778/860/8817/4664/2261/4323/4325/55790/654/2296	12
GO:0036075	replacement ossification	12/3204	26/18493	0.000623212	0.0128715	0.0102645	4208/1305/2778/860/8817/4664/2261/4323/4325/55790/654/2296	12
GO:0060706	cell differentiation involved in embryonic placenta development	12/3204	26/18493	0.000623212	0.0128715	0.0102645	639/430/79977/8320/9421/4188/7855/59343/6789/841/6615/10049	12
GO:0048017	inositol lipid-mediated signaling	46/3204	167/18493	0.000642378	0.0131253	0.010467	9314/5270/23411/284/4734/5527/57624/1634/867/10125/3480/1906/9846/8660/4803/25827/2534/8395/5286/56034/2066/3815/8473/6198/3356/3667/80310/10617/5337/6352/5156/5594/79837/375033/5728/5291/8678/677/2322/2625/7301/5747/5467/5649/5338/3756	46
GO:0021955	central nervous system neuron axonogenesis	14/3204	33/18493	0.000642656	0.0131253	0.010467	9353/1009/7101/9839/2736/104/6324/1141/4929/2043/3320/5728/5747/8929	14
GO:0035725	sodium ion transmembrane transport	40/3204	140/18493	0.000643893	0.0131253	0.010467	1756/6575/23327/288/25769/5581/493/481/57520/4734/483/3799/27347/6330/6334/11280/7402/2745/6574/2040/6326/285195/255738/81/196527/6324/6547/123041/3775/5774/477/7533/254428/81831/5311/6328/479/6323/57030/6327	40
GO:0072073	kidney epithelium development	40/3204	140/18493	0.000643893	0.0131253	0.010467	4208/5915/6495/2668/55366/9353/3217/342184/4072/186/4070/30812/6943/5087/384/596/26585/2719/282679/51804/26249/7849/56998/4088/4090/4087/2043/9863/2246/2045/28514/6299/5311/5420/2625/3207/8642/947/5914/2296	40
GO:0016241	regulation of macroautophagy	44/3204	158/18493	0.000648451	0.013133	0.0104731	5563/57533/10558/4864/8649/3091/836/526/154/23411/57154/4734/9550/3064/60412/5599/1634/140775/6048/25782/5899/8897/2475/22930/5049/664/9517/149371/200576/6885/79443/58528/79837/27131/528/143686/8678/54543/23400/23274/23367/9559/90678/665	44
GO:0043506	regulation of JUN kinase activity	28/3204	88/18493	0.000649225	0.013133	0.0104731	2185/7786/9043/22943/9839/6188/1906/8322/2074/8325/7855/64853/9175/27250/2043/389432/6885/142679/10746/4293/4217/8600/23328/10333/84451/6416/4296/1856	28
GO:0006378	mRNA polyadenylation	17/3204	44/18493	0.000650564	0.013133	0.0104731	22828/10914/123169/11051/64506/10978/56254/79577/22849/11052/64282/55339/23144/1479/56903/9810/2926	17
GO:0006650	glycerophospholipid metabolic process	88/3204	367/18493	0.000671124	0.0135045	0.0107693	2170/83394/126969/51552/285172/9306/8817/256987/114882/55326/5359/2252/942/5277/9846/23659/8660/84725/137964/50487/8651/9655/2261/8897/4952/2534/27124/4204/8395/5781/5286/23761/11145/114884/57515/5867/9365/2066/3815/81579/10818/22979/10162/3356/55500/7915/8867/5281/22908/3667/376497/200576/2246/9110/129642/79887/5337/5156/56261/2099/2549/5322/9926/3949/94005/51099/23236/171586/8835/79837/253558/2…	88
GO:0071496	cellular response to external stimulus	80/3204	328/18493	0.000674013	0.0135191	0.010781	23394/54407/5563/3673/2729/10059/3600/53335/5138/23411/26153/10135/5788/1026/5599/867/3920/355/5899/4214/6502/4067/596/26263/3759/51765/255738/8897/2475/2534/3658/552/5781/5587/1824/490/8428/8648/6506/4193/4929/664/5027/8797/9750/23710/11345/81788/22863/558/93649/1515/477/7494/5292/154743/22927/5594/10746/6263/5562/58528/841/143686/4217/835/654/8678/54468/9681/136319/6416/50801/3992/5029/23274/46…	80
GO:0001823	mesonephros development	31/3204	101/18493	0.000685368	0.0136338	0.0108724	5915/6495/2668/55366/9353/3217/342184/4072/186/4070/30812/6943/5087/384/596/26585/2719/51804/7849/56998/4088/4090/4087/2246/6299/5311/2625/3207/8642/5914/2296	31
GO:0006476	protein deacetylation	31/3204	101/18493	0.000685368	0.0136338	0.0108724	1107/5563/57708/10933/25836/5926/51742/79718/25942/2033/604/23411/6497/5599/4752/56916/1108/56271/11176/1859/5587/10129/2005/51548/6299/5562/84312/138151/51317/4137/5928	31
GO:0009743	response to carbohydrate	58/3204	223/18493	0.000687285	0.0136338	0.0108724	23394/5563/2185/5908/2044/4221/3673/2729/6934/25942/3091/836/6434/6659/4760/10891/5581/125111/7057/415116/10135/5208/81035/3799/4041/9448/130399/222546/8660/6529/4067/2641/50507/2309/84522/252983/6678/2901/6198/7048/285/4087/1515/7494/3939/51714/55638/9572/1285/7776/5562/5728/8938/677/6416/10497/5467/387597	58
GO:0010948	negative regulation of cell cycle process	75/3204	304/18493	0.000688442	0.0136338	0.0108724	9314/4221/10795/29883/4591/23512/1874/11073/79960/56984/2033/5514/55031/604/23468/6659/5347/246175/80314/9337/6118/7756/6347/1026/4194/6241/8243/1876/9700/899/10201/8091/596/79577/9978/10217/55294/8850/678/4193/60561/8555/317/6500/79184/7175/5573/1911/1027/123879/7029/79791/85456/1017/5311/146691/5728/7465/5925/138151/4850/1869/835/677/699/84101/56241/2146/51720/25946/5928/79027/9125/84861/8929	75
GO:2000134	negative regulation of G1/S transition of mitotic cell cycle	34/3204	114/18493	0.000691253	0.0136463	0.0108824	9314/29883/1874/79960/2033/6659/246175/9337/6118/6347/1026/4194/596/79577/10217/4193/1027/123879/7029/79791/85456/1017/5311/5728/7465/5925/138151/4850/1869/835/2146/25946/79027/9125	34
GO:1901987	regulation of cell cycle phase transition	97/3204	412/18493	0.000710808	0.0139882	0.0111551	1654/23476/7325/8452/9314/4221/1028/29883/1874/11073/9793/79960/25942/56984/2033/55031/6659/5962/5347/493/246175/121441/1543/9337/6118/57520/4762/7756/54617/6347/1026/4194/5087/9700/993/9662/8091/596/79577/9978/10217/51529/252983/1453/894/4204/11258/80254/55294/678/4957/8556/4193/60561/8555/6500/79184/59343/10142/5890/7175/3320/54930/1027/123879/5108/7029/8444/79791/85456/9702/1017/5311/54801/232…	97
GO:0051650	establishment of vesicle localization	72/3204	290/18493	0.000721303	0.0141083	0.0112508	23513/64149/55291/1129/5908/8452/10802/9515/10059/27445/128637/9699/7109/9871/63971/3799/10652/3064/116443/10125/966/23122/6809/2332/63915/341359/55435/10814/1453/22906/3800/81/22930/54874/26059/4647/5537/5265/2890/2901/776/3356/23243/1141/1176/5027/8867/4644/26258/114088/6857/9632/55062/55638/51128/3798/8729/79443/112476/9527/8976/5582/6853/84258/140730/23025/1813/10497/9783/10972/28964/815	72
GO:1903008	organelle disassembly	30/3204	97/18493	0.000721419	0.0141083	0.0112508	3091/10059/10891/57154/7443/3799/3064/84340/493856/7855/55294/1513/3099/664/23710/11345/22863/7416/55062/8444/8729/92399/55102/8678/54543/23400/23130/23274/665/2931	30
GO:0008015	blood circulation	113/3204	492/18493	0.000724026	0.0141151	0.0112563	1756/2244/3212/23327/1129/10371/2313/2729/1874/9353/3363/5144/2697/10059/185/5138/154/10052/493/10266/481/186/284/2643/491/10135/70/112/6532/4041/27347/9732/6330/8529/1278/444/1906/155/8509/83988/3759/3269/2475/8913/29/4204/2028/552/5286/8654/2243/5350/1824/6781/6324/490/6547/11149/4193/3709/776/56998/3356/4088/4090/10142/3775/151/613/116/5125/388591/255061/28514/477/6387/775/2982/3781/257313/128…	113
GO:0003281	ventricular septum development	24/3204	72/18493	0.000734015	0.0142654	0.0113762	3516/163/9353/639/8321/10370/6659/51684/7049/7046/60485/7798/54583/7849/10818/4193/7048/23462/6299/90/57493/23493/7468/2625	24
GO:0060688	regulation of morphogenesis of a branching structure	20/3204	56/18493	0.000742575	0.0143871	0.0114732	6495/6256/2668/55366/55727/3217/53335/186/4070/30812/2252/2119/26585/51804/7849/9175/59277/57142/51548/2099	20
GO:0030534	adult behavior	40/3204	141/18493	0.000750946	0.0145028	0.0115654	10752/2668/4864/124925/7545/2743/23657/8029/9698/114781/5090/4204/9455/6506/3356/1141/4929/84189/64854/7111/9378/2043/477/6387/57578/8997/26050/285671/6323/5728/1267/22941/58524/3766/2693/55636/1813/127343/85358/1949	40
GO:1990845	adaptive thermogenesis	42/3204	150/18493	0.000753181	0.0145028	0.0115654	3516/55366/64641/2697/3600/2778/5746/10891/3192/154/2887/7852/3480/9658/155/6319/2628/3662/56034/23228/4857/8473/55818/7030/79071/23090/8809/116/6868/7090/51548/9572/1240/5925/7067/5565/9807/23135/133522/51087/8929/3934	42
GO:0045930	negative regulation of mitotic cell cycle	70/3204	281/18493	0.00076854	0.0147531	0.0117651	23513/9314/29883/1874/11073/79960/56984/2033/5514/55031/604/6659/5347/246175/9337/6118/7756/694/7155/6347/1026/4194/7976/10201/8091/596/79577/9978/10217/678/8556/4193/60561/8555/4088/6500/7175/284071/9863/5774/1027/123879/7029/79791/85456/1017/5311/146691/64859/5728/7465/5925/79648/138151/4850/10950/1869/51696/835/339479/677/699/84101/5546/2146/25946/2296/79027/9125/84861	70
GO:0048738	cardiac muscle tissue development	58/3204	224/18493	0.000773599	0.0148048	0.0118063	55553/4208/3516/5915/6256/8470/3720/11214/22943/3192/10052/186/70/8289/9421/7049/7046/1906/9472/60485/1385/50507/2475/4211/26585/5350/2066/11149/54583/10818/1432/7048/8324/5573/28514/93649/5292/51548/6443/5156/90/57493/2254/5728/6262/9794/23493/10611/6416/4205/55636/5600/7161/23135/2539/5914/2296/2931	58
GO:0090042	tubulin deacetylation	7/3204	11/18493	0.000800279	0.0152687	0.0121763	5563/2033/4752/56271/10129/5562/4137	7
GO:1902115	regulation of organelle assembly	50/3204	187/18493	0.000803604	0.0152856	0.0121897	5563/10274/4208/57533/255967/4591/50807/11214/5601/5962/3192/5347/246175/989/4117/3064/8243/79734/1906/140775/57489/6048/25782/153241/5899/9662/8897/49856/22930/8850/8027/55704/347730/9924/9378/6624/6311/7175/344022/200576/3556/79598/7251/5562/79837/4134/23300/8678/126731/90678	50
GO:0051271	negative regulation of cellular component movement	89/3204	374/18493	0.000809719	0.0153523	0.0122429	4208/9901/25932/9314/928/23613/10371/90627/4286/58516/9353/889/4856/1602/23143/10370/94241/10891/89795/7057/186/4070/11171/10512/6347/114882/1634/84978/130399/7049/10505/1281/56254/54910/23122/8646/56940/6405/596/51765/5314/55435/2309/29/4204/11240/81/26585/375056/104/6781/2066/8428/57826/23380/285/9750/57556/613/57522/5054/9863/5793/27202/93649/1398/54328/1027/6387/5911/11057/8482/6774/9231/2323…	89
GO:1901215	negative regulation of neuron death	53/3204	201/18493	0.000812018	0.0153523	0.0122429	23394/4208/2185/6495/10752/7786/84678/4671/2668/2729/163/3091/3329/8321/10891/2020/23411/284/3845/64802/23657/6347/2561/867/4803/596/1385/2534/4204/51804/135112/2898/6418/4929/5921/16/728/558/10617/7336/6774/27324/6648/84280/6653/6416/5582/6453/5536/23400/128434/7301/947	53
GO:0003007	heart morphogenesis	64/3204	253/18493	0.000827906	0.0156055	0.0124448	4208/3516/5915/6495/6256/25836/9353/3091/8321/10370/22943/6659/51684/79977/171023/4734/23768/70/10512/2294/57534/9421/7049/7046/27031/23129/2787/60485/2475/54583/55036/4193/4088/200894/7048/23462/27250/388591/344022/57142/28514/5292/51548/10439/8828/90/5311/57493/1289/3037/6262/23493/7468/6654/10454/55636/2625/6615/5747/8642/1856/5914/2296/2931	64
GO:0051648	vesicle localization	75/3204	306/18493	0.000840104	0.0157792	0.0125833	23513/64149/55291/1129/5908/8452/10802/9515/10059/27445/128637/9699/7109/9871/63971/3799/10652/3064/116443/10125/966/23122/6809/2332/63915/341359/55435/10814/1453/22906/3800/81/57555/22930/54874/26059/4647/5537/5265/2890/2901/776/3356/23243/1141/1176/5027/8867/4644/26258/9863/114088/6857/9632/55062/55638/51128/3798/8729/79443/112476/5728/9527/8976/5582/6853/84258/140730/23025/1813/10497/9783/1097…	75
GO:0071229	cellular response to acid chemical	54/3204	206/18493	0.000846307	0.0157792	0.0125833	5563/2185/5915/6495/9314/23677/2042/2729/8649/53335/10891/5581/112/6532/64506/1278/1906/1281/8322/8651/1290/4067/23304/1385/2475/27/2534/22849/3658/552/56034/5737/8324/80310/7494/19/1374/5156/3949/5311/5562/58528/143686/1869/6096/339479/7292/50801/5914/26012/2867/5753/54331/84861	54
GO:2001020	regulation of response to DNA damage stimulus	54/3204	206/18493	0.000846307	0.0157792	0.0125833	2070/51366/8505/5514/55031/80311/7913/6498/254225/23411/6118/6188/401720/116028/55719/55137/4968/2072/51616/8091/596/2332/151636/1859/960/4862/23201/5893/4193/60561/22925/2140/79184/3014/6387/51548/8444/7336/1655/56950/10721/138151/142/7468/57332/10635/4137/5582/6615/7335/51720/25946/1663/23049	54
GO:0030324	lung development	46/3204	169/18493	0.000847203	0.0157792	0.0125833	3516/5241/2033/79977/171023/3845/8817/23657/2294/2736/429/6943/2252/10253/340419/93986/27031/157506/60485/1385/9678/1116/55294/2719/6431/6678/4323/55036/7048/9394/4087/83716/4015/2246/64399/93649/5156/5594/9231/57493/2254/342371/7067/10454/10630/7068	46
GO:0046486	glycerolipid metabolic process	106/3204	459/18493	0.00085183	0.0158183	0.0126145	2170/83394/126969/23259/51552/8526/79718/285172/9306/23411/8817/256987/2169/256356/114882/55326/5359/2252/942/7069/5277/9846/747/23659/8660/84725/137964/50487/8651/9655/255738/2261/8897/4952/2534/27124/2182/4204/8395/5781/5286/23761/11145/114884/55294/57515/5867/9365/2066/3815/81579/11343/10818/22979/10162/3356/55500/51196/7915/8867/5281/22908/3667/376497/200576/22863/2246/9110/129642/79887/5337/…	106
GO:0021987	cerebral cortex development	33/3204	111/18493	0.000873635	0.0160763	0.0128203	54407/10371/9353/3091/50937/6434/7101/8320/55970/429/23353/6867/4040/93986/1281/153241/7804/26468/85458/5080/664/23380/3014/22903/57142/8828/23236/2018/30837/79648/170302/5649/317762	33
GO:0046854	phosphatidylinositol phosphorylation	33/3204	111/18493	0.000873635	0.0160763	0.0128203	285172/9306/8817/2252/942/8660/8651/9655/2261/2534/8395/5781/5286/9365/2066/3815/10818/22979/3667/200576/2246/5156/2099/2549/8835/79837/2254/5291/30837/9807/10380/145567/23049	33
GO:0099565	chemical synaptic transmission postsynaptic	33/3204	111/18493	0.000873635	0.0160763	0.0128203	2891/4208/2185/56853/23613/642938/124925/154/2743/9699/1146/4204/66000/57555/22930/2890/2898/2901/1141/5027/1742/9378/4355/2892/55607/5728/22941/57030/1813/85358/10497/5649/2931	33
GO:0016574	histone ubiquitination	17/3204	45/18493	0.000878573	0.0160763	0.0128203	84678/51366/4591/23512/123169/10336/56254/79577/23304/151636/84333/5896/6500/54880/1911/57332/9810	17
GO:0048701	embryonic cranial skeleton morphogenesis	17/3204	45/18493	0.000878573	0.0160763	0.0128203	4208/6495/25836/2778/79977/860/7046/5396/157506/51804/4323/4088/4325/7048/4087/5156/50515	17
GO:0097067	cellular response to thyroid hormone stimulus	9/3204	17/18493	0.000884554	0.0161386	0.0128699	6495/2729/5962/10891/687/1520/3815/4005/2693	9
GO:0051938	L-glutamate import	8/3204	14/18493	0.000894984	0.0162342	0.0129462	23657/23204/6506/10550/477/6507/57030/3766	8
GO:0061548	ganglion development	8/3204	14/18493	0.000894984	0.0162342	0.0129462	6495/10371/429/7976/6405/51804/8828/8929	8
GO:0016311	dephosphorylation	109/3204	475/18493	0.000918786	0.0165075	0.0131641	9530/2070/4208/55291/10231/7529/3673/54886/23291/4659/5515/5494/5496/5514/55917/81537/51496/5511/5787/186/5534/8036/8178/5495/23076/5527/5208/79660/392617/5788/5775/22853/3064/27143/8483/81706/1408/57546/993/403313/56940/9472/84513/55066/596/221294/8446/57221/160760/163882/10217/8897/2475/4952/5771/23261/27124/80034/5500/4249/5781/27068/63898/9562/5537/9887/8556/6418/8555/4088/10160/85464/2140/55…	109
GO:0021545	cranial nerve development	18/3204	49/18493	0.000920601	0.0165075	0.0131641	3212/6495/10371/4762/6405/104/51804/1141/84189/6507/8828/6299/89797/3213/3200/55636/1902/8929	18
GO:0060324	face development	18/3204	49/18493	0.000920601	0.0165075	0.0131641	25836/7763/22943/79977/25976/6497/4040/444/5781/22930/220/83716/84159/5156/5594/3213/55636/5914	18
GO:1990090	cellular response to nerve growth factor stimulus	18/3204	49/18493	0.000920601	0.0165075	0.0131641	9693/867/4803/1385/2309/1453/66000/29904/57498/9863/1398/5728/1783/1869/9101/4137/6456/6272	18
GO:0006607	NLS-bearing protein import into nucleus	12/3204	27/18493	0.000946112	0.0169165	0.0134903	729540/84220/653489/727851/285190/3840/5903/26953/3839/51517/3842/7227	12
GO:0060675	ureteric bud morphogenesis	22/3204	65/18493	0.000953628	0.0170023	0.0135587	6495/2668/55366/3217/342184/186/4070/30812/6943/5087/596/26585/2719/51804/7849/56998/2246/6299/5311/2625/3207/8642	22
GO:0045815	positive regulation of gene expression epigenetic	21/3204	61/18493	0.000961528	0.0170944	0.0136322	57379/2033/57492/5253/7913/54454/8289/3159/2074/8467/11240/9015/79101/8850/9188/60/9031/25842/9757/23133/84337	21
GO:0060079	excitatory postsynaptic potential	31/3204	103/18493	0.00098584	0.017477	0.0139373	2891/4208/2185/56853/23613/124925/154/2743/9699/1146/4204/66000/57555/22930/2890/2898/2901/1141/5027/1742/9378/4355/2892/55607/5728/22941/57030/1813/85358/5649/2931	31
GO:1990138	neuron projection extension	44/3204	161/18493	0.000991001	0.0175189	0.0139707	23394/23327/26053/10371/9353/53335/134430/9699/57154/10512/780/26999/10505/22902/54910/6405/65059/66000/214/7224/23769/57698/4692/9175/57556/84298/3320/57142/6387/6857/8482/10439/8828/10509/1808/4131/3984/4897/4137/2335/84258/23025/9423/6456	44
GO:0097305	response to alcohol	59/3204	231/18493	0.00100588	0.0177318	0.0141404	5563/2185/9314/2770/3747/9353/94241/5581/3157/70/112/687/116443/7412/4040/1026/867/7049/7046/1236/4968/6354/7804/2309/2534/113/3658/552/5737/490/6678/3709/6198/54464/7048/1141/64854/116/4087/80854/19/57578/23209/6774/5741/5562/5728/841/142/7292/2625/1813/23367/117/2539/5914/761/54331/4880	59
GO:0014033	neural crest cell differentiation	27/3204	86/18493	0.00100975	0.01775	0.014155	4208/10371/2668/3091/9839/8092/2637/10512/30812/4040/10505/1906/54910/157506/6405/84541/2487/2066/57556/8482/8828/90/5594/10509/309/2296/8929	27
GO:0038127	ERBB signaling pathway	40/3204	143/18493	0.00101315	0.0177599	0.0141629	8874/55914/2185/3516/222584/122809/58513/10253/867/356/30011/9655/5771/255324/55614/5781/5286/55294/2066/8027/51196/2060/6868/5774/3320/57142/2549/9185/5594/7251/9252/27131/6654/6464/9770/26469/5747/6456/5753/9125	40
GO:0014031	mesenchymal cell development	26/3204	82/18493	0.00105465	0.0183333	0.0146202	10371/2668/3091/9839/8092/2637/10512/30812/10505/1906/54910/157506/6405/596/84541/2066/57556/8482/8828/90/5594/10509/23493/309/2296/8929	26
GO:0048864	stem cell development	26/3204	82/18493	0.00105465	0.0183333	0.0146202	10371/2668/3091/9839/8092/2637/10512/5788/30812/10505/1906/54910/157506/6405/84541/2066/57556/8482/8828/90/5594/10509/124540/309/2296/8929	26
GO:0110110	positive regulation of animal organ morphogenesis	26/3204	82/18493	0.00105465	0.0183333	0.0146202	3516/6495/2668/55366/3217/22943/186/10512/30812/2252/93986/7046/1906/26585/6431/51804/7849/10818/7048/2246/7494/5292/90/2625/3207/947	26
GO:0043062	extracellular structure organization	94/3204	402/18493	0.0010726	0.0185936	0.0148277	2244/4811/1288/8728/58494/3673/871/3685/1305/185/3381/1463/7101/10266/7057/23768/2294/780/4982/102/7412/1404/1634/1278/5326/7046/3690/1281/23122/255631/7133/1290/56605/3696/91522/1803/51144/3818/960/323/2243/26585/7092/1520/6678/8027/1513/4323/5654/4088/4325/149371/83716/6624/4015/5054/4358/1515/133584/1462/3038/19/8038/5156/5322/3691/1285/7251/64094/1289/9644/55790/3037/342371/5925/2295/8076/841…	94
GO:0010977	negative regulation of neuron projection development	41/3204	148/18493	0.00108605	0.0186312	0.0148577	1400/10371/9353/50807/53335/9693/10512/112/9448/10505/22902/54910/6405/9860/27124/6695/2672/7224/4193/57556/7225/2043/5793/2045/57142/7533/8482/9529/10509/5728/84894/1902/56963/4804/23251/1949/5747/9423/23189/152559/4038	41
GO:0042770	signal transduction in response to DNA damage	37/3204	130/18493	0.00108667	0.0186312	0.0148577	29883/1874/2033/6659/5347/246175/9337/23411/1026/4194/2309/1859/960/80254/1432/4193/60561/8555/22925/79184/4646/1027/7029/8444/85456/1017/1655/56950/4850/1869/835/6615/51720/25946/6672/9100/9125	37
GO:1903825	organic acid transmembrane transport	37/3204	130/18493	0.00108667	0.0186312	0.0148577	54407/8604/117247/23169/159963/7057/23657/6533/27347/7069/8884/8660/83733/81539/253512/6512/23204/6506/9152/23428/151258/6509/10550/55117/477/1374/6566/6507/57030/3766/6534/55238/10630/6535/1468/113235/6542	37
GO:1905039	carboxylic acid transmembrane transport	37/3204	130/18493	0.00108667	0.0186312	0.0148577	54407/8604/117247/23169/159963/7057/23657/6533/27347/7069/8884/8660/83733/81539/253512/6512/23204/6506/9152/23428/151258/6509/10550/55117/477/1374/6566/6507/57030/3766/6534/55238/10630/6535/1468/113235/6542	37
GO:0001504	neurotransmitter uptake	16/3204	42/18493	0.00111254	0.0190226	0.0151698	2668/23657/6532/81539/3177/6512/23204/6581/6506/6530/9152/10550/477/6507/3766/1813	16
GO:0032528	microvillus organization	11/3204	24/18493	0.00112747	0.0191211	0.0152484	9693/5962/51765/5205/5781/688/6624/5337/5911/5420/54825	11
GO:1900739	regulation of protein insertion into mitochondrial membrane involved in apoptotic signaling pathway	11/3204	24/18493	0.00112747	0.0191211	0.0152484	8626/7529/27113/5599/596/10971/7029/7533/841/1869/7161	11
GO:1900740	positive regulation of protein insertion into mitochondrial membrane involved in apoptotic signaling pathway	11/3204	24/18493	0.00112747	0.0191211	0.0152484	8626/7529/27113/5599/596/10971/7029/7533/841/1869/7161	11
GO:0000422	autophagy of mitochondrion	24/3204	74/18493	0.00113664	0.0191727	0.0152895	3091/10059/10891/57154/3064/493856/7855/55294/1513/3099/664/23710/11345/22863/7416/55062/55102/8678/54543/23400/23130/23274/665/2931	24
GO:0061726	mitochondrion disassembly	24/3204	74/18493	0.00113664	0.0191727	0.0152895	3091/10059/10891/57154/3064/493856/7855/55294/1513/3099/664/23710/11345/22863/7416/55062/55102/8678/54543/23400/23130/23274/665/2931	24
GO:0032496	response to lipopolysaccharide	78/3204	324/18493	0.00116216	0.0195504	0.0155908	4792/4208/55914/7056/57379/57088/3329/5144/27086/836/10891/5581/1543/2921/2643/6347/55970/3454/7412/5599/1634/942/92140/1236/1906/90933/356/7133/4067/79577/55122/29/1439/2326/5737/22900/10859/6678/2672/1432/389643/6198/5027/114609/27250/140885/613/728/5054/6868/558/7494/6352/6197/19/10225/4257/6372/3394/5594/9572/259230/841/129607/1267/80380/654/23328/7097/8754/2693/7292/6373/3727/5467/5914/58509…	78
GO:0072171	mesonephric tubule morphogenesis	22/3204	66/18493	0.00119965	0.0201271	0.0160506	6495/2668/55366/3217/342184/186/4070/30812/6943/5087/596/26585/2719/51804/7849/56998/2246/6299/5311/2625/3207/8642	22
GO:0061097	regulation of protein tyrosine kinase activity	27/3204	87/18493	0.00122615	0.0204738	0.0163271	6886/122809/5788/867/2074/56940/7804/9655/1795/50507/5771/2534/255324/26585/55294/10006/57826/1742/2043/6868/6352/2915/7251/6464/5649/1856/5753	27
GO:0043551	regulation of phosphatidylinositol 3-kinase activity	19/3204	54/18493	0.00122686	0.0204738	0.0163271	2185/9314/9306/29062/1236/8651/4067/9655/2261/5587/3815/3667/22863/5156/8835/30837/2322/5747/2046	19
GO:0019935	cyclic-nucleotide-mediated signaling	55/3204	214/18493	0.00125235	0.0208437	0.0166221	23394/2185/2044/2770/3747/5141/55366/2587/5733/5144/11214/2778/9693/5138/27445/154/493/10266/9699/7057/112/4158/997/2849/155/9472/146/2641/113/5350/5737/11069/112609/151/1979/116/5573/19/51555/5741/59350/5744/5140/577/6373/1902/1813/283383/117/5139/54331/22859/23295/4880/2931	55
GO:0019932	second-messenger-mediated signaling	101/3204	439/18493	0.0012671	0.0210331	0.0167732	23394/1756/10231/2185/2044/2770/3747/5141/55366/2587/5515/5733/5144/185/11214/2778/9693/5138/27445/4760/154/493/10266/481/9699/7057/186/5534/7852/10523/112/5788/3064/7412/4158/997/2849/1236/1906/155/375346/9472/83988/146/2641/3269/2475/23261/113/552/8654/643/5350/5737/9455/11069/112609/3709/51196/5027/4644/151/1979/116/5573/477/775/10725/19/2915/51655/2982/55607/5311/51555/56923/5741/3708/1240/59…	101
GO:0090068	positive regulation of cell cycle process	70/3204	286/18493	0.00127431	0.0210565	0.0167918	1654/23476/7325/8452/25836/29883/1874/25942/2033/6659/5962/3192/5581/246175/1543/9337/4762/54617/5586/55023/4041/1026/4194/5087/9700/1906/55719/993/137886/84440/115426/153241/8091/79577/51529/252983/255324/894/4204/643/2237/51379/4193/5890/7175/1027/7029/8444/85456/1017/5311/23236/29127/6840/54627/5925/4850/11113/1869/835/8678/11105/1813/7161/2146/25946/1663/51289/9125/8929	70
GO:0019933	cAMP-mediated signaling	49/3204	186/18493	0.00127524	0.0210565	0.0167918	2044/2770/5141/55366/2587/5733/5144/11214/2778/9693/5138/27445/154/493/10266/9699/112/4158/997/2849/155/9472/146/2641/113/5350/5737/11069/112609/151/1979/116/19/51555/5741/59350/5744/5140/577/6373/1902/1813/283383/117/5139/54331/22859/23295/2931	49
GO:0048485	sympathetic nervous system development	10/3204	21/18493	0.00131834	0.0217111	0.0173138	8626/10371/2668/6659/429/7976/6405/8828/2625/8929	10
GO:0006665	sphingolipid metabolic process	42/3204	154/18493	0.00133055	0.0218546	0.0174282	79993/94103/10558/5515/81537/60481/6785/55331/256987/124976/23659/340485/2581/3696/55852/5587/57515/3815/6489/204219/10825/79071/23042/23683/256435/7915/5027/9517/7368/91012/9218/64781/8707/412/142891/285362/5562/259230/8703/165679/80772/2760	42
GO:0048872	homeostasis of number of cells	62/3204	248/18493	0.00135099	0.0221321	0.0176495	55553/4208/5926/55366/6886/3091/4856/604/836/6498/171023/3845/23657/51341/124976/10000/7049/1236/4891/51301/4067/596/9991/5771/2309/221395/3658/5781/54700/3815/1432/5896/92/91/4090/5027/51542/613/6868/558/202309/1021/8444/6372/6774/5741/5316/5291/5925/30061/7067/6654/677/10107/2322/2625/9770/2146/2539/387597/84456/129138	62
GO:1901990	regulation of mitotic cell cycle phase transition	88/3204	375/18493	0.00135515	0.0221424	0.0176577	1654/23476/7325/8452/9314/1028/29883/1874/11073/9793/79960/25942/56984/2033/55031/6659/5962/5347/246175/121441/1543/9337/6118/57520/4762/7756/54617/6347/1026/4194/5087/9700/993/9662/8091/596/79577/9978/10217/51529/1453/894/4204/11258/80254/678/4957/8556/4193/60561/8555/6500/59343/10142/5890/7175/3320/54930/1027/123879/5108/7029/79791/85456/9702/1017/5311/54801/23236/5728/7465/5925/138151/4850/229…	88
GO:0050920	regulation of chemotaxis	54/3204	210/18493	0.00136116	0.0221708	0.0176804	2185/79647/3673/10371/9353/4856/7057/7852/8817/10512/6347/102/27347/57643/10505/1236/1906/57509/54910/6809/6405/6354/4067/5771/25960/11240/57118/26585/196527/5587/9943/1432/4088/285/57688/9750/114609/57556/728/80310/5054/6868/2246/27202/6387/6352/8482/5156/1240/64094/10509/727/1902/65249	54
GO:0014065	phosphatidylinositol 3-kinase signaling	38/3204	136/18493	0.00136397	0.0221708	0.0176804	9314/5270/23411/284/4734/5527/57624/1634/867/10125/3480/1906/25827/2534/8395/5286/56034/2066/3815/3356/3667/80310/10617/6352/5156/5594/79837/375033/5728/5291/8678/677/2322/2625/7301/5747/5467/5649	38
GO:0017148	negative regulation of translation	51/3204	196/18493	0.00138035	0.0223788	0.0178463	56853/1654/10492/29883/11236/54517/56478/253943/55147/246175/9337/8087/6188/9698/5813/64506/7072/1612/10644/10642/10643/131405/2332/55095/10140/27161/22849/3658/27102/10236/678/54464/8507/51441/1979/7175/340719/26523/4076/65981/9470/6774/57721/399664/677/5936/23367/4343/1978/5914/9125	51
GO:0051984	positive regulation of chromosome segregation	12/3204	28/18493	0.00139682	0.0225291	0.0179661	79677/8452/25836/3192/9700/55719/56852/51529/2237/5925/8678/1663	12
GO:2000765	regulation of cytoplasmic translation	12/3204	28/18493	0.00139682	0.0225291	0.0179661	64506/2332/89978/2475/285381/22849/100132911/51611/51441/16/152789/25946	12
GO:0038179	neurotrophin signaling pathway	15/3204	39/18493	0.00140777	0.0226474	0.0180604	836/9693/186/26999/10253/4803/5781/66000/57498/10818/4692/9863/6654/4804/6272	15
GO:1903312	negative regulation of mRNA metabolic process	23/3204	71/18493	0.00145267	0.0233098	0.0185887	56853/10492/10921/2668/3192/6429/10642/56254/2332/10140/2475/1859/6431/1432/114609/284071/23435/54855/1869/9810/23367/4615/9967	23
GO:0098656	anion transmembrane transport	66/3204	268/18493	0.00145911	0.0233532	0.0186234	54407/6575/25932/8604/117247/2554/9635/57120/23169/2743/159963/7057/23657/2561/6533/115111/27347/7069/8884/11095/8660/83733/6574/23443/81539/2475/2564/253512/6512/23204/196527/8671/56172/6506/9152/23428/1181/151258/1182/6509/1184/10550/55117/7416/477/19/1374/57468/6566/2915/6507/9213/57030/2569/51449/10723/3766/6534/55238/80727/10630/6535/1468/113235/9498/6542	66
GO:0001667	ameboidal-type cell migration	104/3204	456/18493	0.00146999	0.0234674	0.0187144	9530/8874/4208/2185/9314/3673/6776/10371/7763/90627/2668/154796/6667/9353/3091/889/27086/4856/7101/9839/154810/5581/7057/186/23411/116150/284/8092/8817/2637/4070/11171/10982/10512/5586/30812/2252/10000/1634/9448/130399/10505/7046/1906/3690/54910/23122/6405/23129/27161/2475/6239/25960/1803/4204/4215/5781/5286/26585/375056/55294/2719/5587/6781/2066/3815/6678/7048/23042/91/5829/23380/285/57669/57556…	104
GO:0071375	cellular response to peptide hormone stimulus	74/3204	307/18493	0.00147485	0.0234851	0.0187285	5908/4221/10890/6776/2729/6667/185/55777/526/2887/186/23411/51762/9550/6599/112/114882/55023/64506/3480/1906/8660/8651/4067/2641/1385/255738/5771/2309/2534/252983/113/5781/5286/29904/8850/9365/8473/4193/6198/9847/4929/1176/5829/4644/1979/3667/64397/5573/1398/54328/7494/2549/6774/8835/4218/5728/30837/528/143686/142/5140/6654/677/84275/2693/6464/2101/5747/140710/23189/1978/815/2931	74
GO:0048015	phosphatidylinositol-mediated signaling	44/3204	164/18493	0.001484	0.0235586	0.0187871	9314/5270/23411/284/4734/5527/57624/1634/867/10125/3480/1906/9846/8660/4803/25827/2534/8395/5286/56034/2066/3815/8473/6198/3356/3667/80310/10617/6352/5156/5594/79837/375033/5728/5291/8678/677/2322/2625/7301/5747/5467/5649/3756	44
GO:1902373	negative regulation of mRNA catabolic process	16/3204	43/18493	0.00149024	0.0235586	0.0187871	10492/2668/3192/10642/2332/10140/2475/1432/114609/284071/23435/54855/1869/23367/4615/9967	16
GO:0071230	cellular response to amino acid stimulus	22/3204	67/18493	0.00149817	0.0235586	0.0187871	6495/23677/2729/8649/53335/64506/1278/1281/8651/1290/23304/2475/2534/22849/56034/80310/7494/5156/58528/143686/26012/84861	22
GO:0032026	response to magnesium ion	9/3204	18/18493	0.00149829	0.0235586	0.0187871	288/3747/7057/4982/4193/3736/254428/6263/654	9
GO:0032968	positive regulation of transcription elongation from RNA polymerase II promoter	9/3204	18/18493	0.00149829	0.0235586	0.0187871	23476/8621/123169/8178/51755/79577/6921/55837/11198	9
GO:1901988	negative regulation of cell cycle phase transition	54/3204	211/18493	0.0015267	0.0239451	0.0190953	9314/4221/29883/1874/11073/79960/56984/2033/55031/6659/5347/246175/9337/6118/7756/6347/1026/4194/8091/596/79577/9978/10217/678/4193/60561/8555/6500/79184/7175/1027/123879/7029/79791/85456/1017/5311/5728/7465/5925/138151/4850/1869/835/677/699/84101/56241/2146/51720/25946/79027/9125/84861	54
GO:1990928	response to amino acid starvation	17/3204	47/18493	0.00154251	0.0241325	0.0192448	54407/1026/5599/355/2475/5587/154743/5594/58528/143686/4217/8678/54468/9681/23367/81929/1611	17
GO:0002237	response to molecule of bacterial origin	80/3204	337/18493	0.00154999	0.0241891	0.0192899	4792/4208/55914/7056/57379/57088/3329/5144/27086/836/10891/5581/1543/2921/2643/6347/55970/3454/7412/5599/1634/942/92140/1236/1906/90933/356/7133/4067/79577/55122/7855/29/1439/2326/5737/22900/10859/6678/2672/1432/389643/6198/5027/114609/27250/140885/613/728/5054/6868/558/7494/6352/6197/19/10225/4257/6372/3394/5594/9572/259230/841/129607/1267/80380/654/23328/7097/8754/10333/2693/7292/6373/3727/5467…	80
GO:0010212	response to ionizing radiation	40/3204	146/18493	0.0015569	0.0242366	0.0193278	7056/4221/25836/11073/836/23411/10135/1196/54617/58493/5788/143570/7412/1026/867/64782/2074/6354/8091/596/50507/1789/1432/4193/10276/2140/79184/3014/9575/11011/123879/85453/85456/64859/5562/142/57646/10635/2625/51720	40
GO:0001755	neural crest cell migration	19/3204	55/18493	0.00157408	0.0243827	0.0194443	10371/2668/3091/9839/8092/2637/10512/30812/10505/54910/6405/2066/57556/8482/8828/90/10509/309/8929	19
GO:0032922	circadian regulation of gene expression	19/3204	55/18493	0.00157408	0.0243827	0.0194443	6095/55366/463/10891/3192/23411/10135/8204/1408/1453/5500/4862/8473/9575/9572/79365/10499/4804/1813	19
GO:0055024	regulation of cardiac muscle tissue development	29/3204	97/18493	0.00158207	0.0244248	0.0194779	55553/4208/3516/3720/22943/7049/7046/1906/9472/60485/1385/2475/4211/26585/2066/10818/1432/7048/8324/28514/93649/5292/2254/5728/23493/5600/7161/2539/2931	29
GO:0035270	endocrine system development	36/3204	128/18493	0.00158461	0.0244248	0.0194779	3516/6495/4221/1028/6657/10370/6659/4760/2736/429/5087/7046/222546/1385/5991/5080/7849/4088/1399/116/4087/9575/28514/1021/84159/5156/6299/5594/3213/3200/7067/654/2625/1813/7068/2931	36
GO:0021988	olfactory lobe development	13/3204	32/18493	0.00161442	0.0248231	0.0197955	10371/9353/7101/8320/6497/2066/389549/23287/8482/6299/27164/170302/55636	13
GO:0042921	glucocorticoid receptor signaling pathway	8/3204	15/18493	0.00162731	0.0248708	0.0198335	2908/23054/4734/8289/1408/9575/7533/5536	8
GO:0048505	regulation of timing of cell differentiation	7/3204	12/18493	0.00163341	0.0248708	0.0198335	3516/7101/5270/429/5080/28514/2254	7
GO:1902414	protein localization to cell junction	7/3204	12/18493	0.00163341	0.0248708	0.0198335	23513/5601/25945/5818/81/9231/91862	7
GO:2000650	negative regulation of sodium ion transmembrane transporter activity	7/3204	12/18493	0.00163341	0.0248708	0.0198335	23327/5581/57520/4734/27347/255738/477	7
GO:0048013	ephrin receptor signaling pathway	25/3204	80/18493	0.0016397	0.0249059	0.0198615	8874/3516/2044/2042/163/1173/4067/26037/2534/5781/10092/71/285220/60/5921/2043/2045/1398/8997/8976/6453/1949/5747/28964/2046	25
GO:0006470	protein dephosphorylation	76/3204	318/18493	0.00164712	0.0249463	0.0198937	2070/55291/10231/7529/23291/4659/5515/5494/5496/5514/55917/51496/5511/5787/186/5534/8036/5495/5527/79660/392617/5788/5775/22853/3064/27143/81706/1408/57546/993/56940/9472/55066/596/8446/160760/10217/8897/2475/5771/23261/5500/4249/5781/27068/9562/5537/8556/6418/8555/85464/2140/5523/9891/8073/9863/5774/9110/8725/5793/5510/142679/6815/84930/5728/1850/10454/84959/11099/1760/5536/9829/26469/1813/26012…	76
GO:0006024	glycosaminoglycan biosynthetic process	31/3204	106/18493	0.00165033	0.0249463	0.0198937	8702/26035/10057/90161/23169/1463/10090/284/8704/222537/64711/9334/57214/1634/8509/93010/11041/9956/9953/2719/9394/1462/3038/9672/92370/55790/3037/2683/8703/10402/50515	31
GO:0006282	regulation of DNA repair	33/3204	115/18493	0.00169046	0.0254914	0.0203284	2070/51366/8505/80311/7913/254225/23411/6118/6188/401720/116028/55719/55137/4968/8091/151636/4862/23201/5893/2140/79184/3014/51548/7336/10721/142/7468/57332/10635/5582/7335/51720/1663	33
GO:0034109	homotypic cell-cell adhesion	24/3204	76/18493	0.0017166	0.0258233	0.0205931	2244/288/928/2778/5962/5270/23657/84465/3690/4067/2243/84466/1824/71/60/6352/5156/375033/5291/8600/84959/1465/7301/10630	24
GO:0007517	muscle organ development	93/3204	403/18493	0.00174616	0.026205	0.0208975	55553/3131/1756/4208/3516/6495/6256/79647/7504/463/3720/2033/8321/50937/22943/8763/8320/23411/4762/8087/70/6497/57496/23060/30812/6943/9421/1634/93986/7049/7046/1906/55909/7402/1281/9472/596/26263/60485/1385/2475/5077/283078/4211/9975/825/26585/104/84466/2066/51804/11149/54583/10818/1432/2317/6198/4088/7048/688/9750/8324/28514/93649/7494/5292/51548/6443/84159/56261/1655/1073/5562/57493/51111/2254…	93
GO:0035282	segmentation	30/3204	102/18493	0.00176322	0.0263978	0.0210512	163589/3516/10371/2033/22943/9839/4762/10512/2294/79728/4040/57534/10655/85407/6405/441478/7855/56983/10818/4088/57669/28514/4300/8828/3234/79365/10683/1856/22823/2296	30
GO:0043112	receptor metabolic process	48/3204	184/18493	0.00177001	0.0264361	0.0210818	23513/928/163/10802/3685/1173/3091/22943/10266/57154/284/4734/22853/84133/10564/1906/3690/146395/9341/2332/151636/255738/55435/81573/55614/26585/10859/11149/2890/347730/64854/8867/284654/1742/8301/2060/6311/9863/54894/7436/9572/6424/157/8678/7037/1813/8862/6456	48
GO:0048255	mRNA stabilization	14/3204	36/18493	0.00177949	0.0265144	0.0211443	10492/2668/3192/10642/2475/1432/114609/284071/23435/54855/1869/23367/4615/9967	14
GO:0043524	negative regulation of neuron apoptotic process	40/3204	147/18493	0.00178758	0.0265717	0.02119	23394/4208/2185/6495/10752/7786/84678/4671/2668/2729/3091/3329/10891/2020/284/3845/64802/6347/2561/4803/596/2534/4204/51804/2898/6418/4929/5921/16/728/558/10617/7336/27324/6648/6416/5582/6453/128434/7301	40
GO:0007160	cell-matrix adhesion	56/3204	222/18493	0.00180369	0.0267476	0.0213302	2244/10979/8874/4811/2185/3673/2042/3685/1305/604/342184/7057/780/7412/9448/1236/3690/7402/340485/1281/23122/56940/596/54749/10855/960/2243/26585/26515/4323/9358/4088/25992/5829/395/57669/5921/158326/5054/1021/10225/3691/10420/5728/5291/8754/51057/84962/2335/50488/22998/5747/947/4814/284348/3683	56
GO:0007173	epidermal growth factor receptor signaling pathway	34/3204	120/18493	0.0018373	0.0271816	0.0216764	8874/55914/2185/222584/122809/58513/10253/867/356/30011/9655/5771/255324/55614/5781/5286/55294/8027/51196/2060/6868/5774/2549/9185/7251/9252/27131/6654/6464/9770/5747/6456/5753/9125	34
GO:0045445	myoblast differentiation	26/3204	85/18493	0.00188419	0.0278096	0.0221771	4208/55796/3516/79647/6934/4154/50937/694/30812/55662/825/26585/389072/1432/9750/28514/93649/1655/23236/91653/5925/9794/4217/677/5467/25988	26
GO:0061001	regulation of dendritic spine morphogenesis	15/3204	40/18493	0.00189603	0.0278529	0.0222117	10059/102/26037/7804/29904/2043/4076/8997/65981/55607/5728/10611/85358/5649/9762	15
GO:0071526	semaphorin-plexin signaling pathway	15/3204	40/18493	0.00189603	0.0278529	0.0222117	10371/2668/10512/10505/54910/6405/23129/10154/57556/23616/8482/8828/10509/4684/23654	15
GO:0034249	negative regulation of cellular amide metabolic process	54/3204	213/18493	0.00191162	0.0280161	0.0223418	56853/1654/94103/10492/29883/11236/54517/56478/253943/55147/246175/9337/8087/6188/9698/5813/64506/7072/1612/10644/10642/10643/131405/2332/55095/10140/27161/22849/3658/27102/10236/678/54464/8507/51441/1979/7175/340719/26523/4076/65981/9470/6774/57721/399664/5562/6653/677/5936/23367/4343/1978/5914/9125	54
GO:0018394	peptidyl-lysine acetylation	44/3204	166/18493	0.00192144	0.028053	0.0223713	8295/5563/10933/26053/79960/25942/2033/6659/10891/26038/23338/80314/57673/23411/55677/6877/9329/7994/51200/5977/51616/3662/284058/4204/80218/8850/8473/8648/6418/55683/9575/93649/6885/9027/114799/86/9252/55209/5562/26122/27097/2625/23741/55689	44
GO:0050770	regulation of axonogenesis	47/3204	180/18493	0.0019231	0.028053	0.0223713	23394/10371/7504/9353/134430/9839/6498/10090/10512/57643/10505/22902/4803/54910/6405/23129/10154/26037/22906/7224/57698/85464/9175/57688/57556/2043/2045/57142/6387/8482/10439/10509/1808/4131/5728/3984/4897/4137/2335/84894/4804/65249/1949/5747/9423/23654/4038	47
GO:0070302	regulation of stress-activated protein kinase signaling cascade	59/3204	237/18493	0.00193049	0.0280954	0.022405	2185/8312/7786/260425/4221/2122/10371/9043/22943/10771/9839/6188/9448/10125/1236/3480/1906/392255/355/54910/8322/2074/56940/4067/8325/7855/4215/64853/2898/9175/114609/27250/140885/8324/2043/10550/389432/5911/6885/142679/5594/10746/23236/55504/4293/4217/8600/23328/2218/10333/7498/84451/6416/768211/9770/50488/91862/4296/1856	59
GO:0055123	digestive system development	39/3204	143/18493	0.00193502	0.028096	0.0224055	8626/5915/25836/1028/55366/639/3091/1543/2294/2736/429/6943/1026/27031/1281/596/60485/56034/3815/55036/4088/7048/348093/688/57669/4087/5125/93649/7494/5156/6299/3691/2254/5925/2295/51057/8642/5753/79827	39
GO:0060419	heart growth	31/3204	107/18493	0.00194464	0.0281687	0.0224635	4208/3516/6256/8470/3720/11214/186/7049/7046/1906/9472/60485/2475/4211/2066/1432/7048/5573/5292/51548/57493/2254/5728/23493/10611/6416/5600/7161/2539/2296/2931	31
GO:0072331	signal transduction by p53 class mediator	55/3204	218/18493	0.00196188	0.0281687	0.0224635	50484/8626/29883/1874/6874/2033/55003/6659/94241/26038/246175/9337/23411/133746/6877/7994/1026/4194/51616/64782/1870/596/2309/1859/960/54700/1432/4193/22925/4646/9891/1027/204851/80196/7029/8444/85456/1017/1655/56950/10210/4850/57646/1869/835/11198/5600/6615/23612/7161/51246/25946/6672/9100/9125	55
GO:0001658	branching involved in ureteric bud morphogenesis	20/3204	60/18493	0.00196673	0.0281687	0.0224635	6495/2668/55366/3217/186/4070/30812/6943/5087/596/26585/2719/51804/7849/56998/2246/6299/5311/3207/8642	20
GO:0051057	positive regulation of small GTPase mediated signal transduction	20/3204	60/18493	0.00196673	0.0281687	0.0224635	26053/50937/11214/3845/8036/10982/9448/10125/1281/4803/137735/115727/6654/221002/2840/1902/6993/5649/117/2846	20
GO:0018023	peptidyl-lysine trimethylation	16/3204	44/18493	0.00197006	0.0281687	0.0224635	23476/5926/79609/51742/23081/57673/23411/55677/80335/200424/4204/84193/8473/51111/9757/54904	16
GO:0046834	lipid phosphorylation	35/3204	125/18493	0.0019826	0.0281687	0.0224635	8526/285172/9306/8817/2252/942/8660/8651/9655/2261/2534/8395/5781/5286/9365/2066/3815/10818/22979/3667/200576/2246/64781/5156/2099/2549/8835/79837/2254/5291/30837/9807/10380/145567/23049	35
GO:1902806	regulation of cell cycle G1/S phase transition	48/3204	185/18493	0.00199595	0.0281687	0.0224635	1654/7325/9314/4221/29883/1874/79960/2033/6659/5962/493/246175/1543/9337/6118/54617/6347/1026/4194/596/79577/10217/252983/894/55294/4193/59343/1027/123879/7029/79791/85456/1017/5311/23236/5728/7465/5925/138151/4850/1869/835/56892/56241/2146/25946/79027/9125	48
GO:0015800	acidic amino acid transport	19/3204	56/18493	0.00200108	0.0281687	0.0224635	54407/8604/23657/6529/83733/6512/552/23204/22930/6506/5027/10550/477/6857/6507/2917/57030/3766/55238	19
GO:1903749	positive regulation of establishment of protein localization to mitochondrion	19/3204	56/18493	0.00200108	0.0281687	0.0224635	8626/7529/27113/5599/596/7855/7332/7323/55294/10971/7029/7533/5562/841/1869/54543/7161/10055/2931	19
GO:0060993	kidney morphogenesis	28/3204	94/18493	0.00200441	0.0281687	0.0224635	6495/2668/55366/3217/6659/342184/186/4070/30812/6943/5087/80144/27031/51301/596/26585/2719/51804/26249/7849/56998/5613/2246/6299/5311/2625/3207/8642	28
GO:2000060	positive regulation of ubiquitin-dependent protein catabolic process	28/3204	94/18493	0.00200441	0.0281687	0.0224635	2185/8312/2729/11236/6613/1601/5601/122809/5347/57154/9817/440730/26263/9655/9978/28951/1453/55294/4193/9709/285671/7336/5728/54467/26259/23640/5747/2931	28
GO:0008542	visual learning	17/3204	48/18493	0.00200812	0.0281687	0.0224635	23259/3091/4212/85461/27020/3845/8704/23657/1385/3269/2475/4204/3815/5896/1141/477/1813	17
GO:0010390	histone monoubiquitination	12/3204	29/18493	0.00201083	0.0281687	0.0224635	84678/4591/123169/10336/56254/79577/151636/84333/5896/6500/54880/9810	12
GO:0034243	regulation of transcription elongation from RNA polymerase II promoter	12/3204	29/18493	0.00201083	0.0281687	0.0224635	23476/8621/123169/10771/3192/8178/51755/79577/6921/55837/11198/2146	12
GO:0034698	response to gonadotropin	12/3204	29/18493	0.00201083	0.0281687	0.0224635	2729/5069/10891/3157/7049/6528/7849/6716/1515/2693/26012/2046	12
GO:0007178	transmembrane receptor protein serine/threonine kinase signaling pathway	80/3204	340/18493	0.00201275	0.0281687	0.0224635	10979/3516/4221/1028/4093/4053/5494/285704/2033/8321/4856/1601/10370/22943/51496/9197/6498/7057/23411/57154/860/11171/6497/51701/51341/8483/1278/867/130399/7049/7046/392255/10923/1281/8646/56940/1385/10140/7323/7321/26585/2719/1432/5654/92/23090/4088/135228/7048/114990/91/4090/348093/5829/27250/9372/4087/23144/6868/9863/9110/93649/6885/90/4756/1655/6424/2254/6262/142/656/65997/654/10454/8754/5696…	80
GO:0002090	regulation of receptor internalization	18/3204	52/18493	0.00201655	0.0281687	0.0224635	23513/22943/284/3690/146395/2332/255738/26585/347730/64854/284654/1742/6311/9863/6424/1813/8862/6456	18
GO:0032869	cellular response to insulin stimulus	52/3204	204/18493	0.00202204	0.0281824	0.0224744	10890/2729/6667/526/2887/23411/51762/9550/6599/114882/55023/64506/3480/8660/8651/255738/5771/2309/252983/5781/5286/29904/8850/9365/8473/6198/9847/1176/4644/1979/3667/64397/7494/2549/8835/4218/5728/30837/528/143686/142/5140/6654/677/84275/2693/6464/2101/140710/23189/1978/2931	52
GO:0003015	heart process	62/3204	252/18493	0.00204033	0.0282432	0.022523	1756/23327/1129/10371/5144/2697/10059/11214/10052/493/481/186/2643/491/70/6330/444/1906/3759/50507/2475/8913/2534/552/8654/5350/1824/6781/6324/490/6547/11149/4193/3709/776/4090/10142/3775/388591/477/775/3781/3708/6263/6323/6262/23493/7067/6327/157378/4205/1760/10699/3784/3777/1813/8862/7068/60598/6271/4880/2931	62
GO:0045663	positive regulation of myoblast differentiation	10/3204	22/18493	0.00204445	0.0282432	0.022523	4208/79647/50937/694/55662/1432/9750/23236/91653/4217	10
GO:0061213	positive regulation of mesonephros development	10/3204	22/18493	0.00204445	0.0282432	0.022523	6495/2668/55366/3217/186/30812/26585/51804/7849/2625	10
GO:2000050	regulation of non-canonical Wnt signaling pathway	10/3204	22/18493	0.00204445	0.0282432	0.022523	1601/22943/84133/85407/27031/1453/2719/4300/6424/23500	10
GO:1901652	response to peptide	108/3204	481/18493	0.00208722	0.0287585	0.0229339	4792/2170/55914/5908/9314/4221/2770/10890/6776/2729/6667/185/55777/526/154/2887/186/23411/6429/10135/51762/694/9550/6599/112/114882/55023/4040/64506/130399/7049/3480/1906/8660/90933/8651/4067/2641/1385/255738/2475/5771/2309/2534/252983/113/5781/5286/29904/5350/8850/9365/6431/6678/8473/1432/4193/6198/6716/9847/4929/1176/5829/4644/688/782/1979/3667/64397/376497/2043/5573/1398/54328/6387/7494/2915/2…	108
GO:0001570	vasculogenesis	24/3204	77/18493	0.00209095	0.0287585	0.0229339	10352/3685/154796/9693/10052/10266/25976/2294/7049/55662/8322/3696/55294/7048/23462/5921/93649/57493/3037/23493/677/7498/5747/947	24
GO:0045927	positive regulation of growth	65/3204	267/18493	0.00213371	0.0292824	0.0233516	23394/4208/2185/3516/23327/1654/25836/84678/55031/9699/57154/54617/9254/102/1982/7049/7046/22902/1906/4803/51616/9472/596/1385/2475/552/825/23404/2066/1432/4323/7224/6198/57698/7048/9175/6868/28514/6387/6857/5292/6197/8482/23236/4131/2254/3984/29842/23493/170302/84275/2693/3021/136319/4137/2335/55636/84258/23025/1813/2137/5467/6195/9423/84861	65
GO:0072401	signal transduction involved in DNA integrity checkpoint	23/3204	73/18493	0.00219187	0.0299492	0.0238834	29883/1874/2033/6659/5347/246175/9337/1026/4194/4193/60561/8555/79184/1027/7029/85456/1017/4850/1869/835/51720/25946/9125	23
GO:0072422	signal transduction involved in DNA damage checkpoint	23/3204	73/18493	0.00219187	0.0299492	0.0238834	29883/1874/2033/6659/5347/246175/9337/1026/4194/4193/60561/8555/79184/1027/7029/85456/1017/4850/1869/835/51720/25946/9125	23
GO:0090066	regulation of anatomical structure size	111/3204	497/18493	0.00219991	0.0299935	0.0239187	9530/23394/2244/2185/29767/10152/10371/7504/2729/1874/1173/9353/3363/185/54551/134430/5962/342184/343578/5581/154/186/2643/10512/112/133746/6532/9732/10000/8799/10505/1236/22902/1906/155/4803/79822/54910/6405/1385/3269/55435/2475/552/11034/5286/2243/196527/7224/832/3356/57698/10092/85464/10178/55604/5027/9175/120/7111/8301/151/57556/1182/116/5921/23616/2045/57142/477/375189/6387/3778/8482/57468/1…	111
GO:0010959	regulation of metal ion transport	87/3204	376/18493	0.00221977	0.0301985	0.0240822	1756/2185/23327/288/3747/5144/116444/5581/154/5270/493/481/57520/4734/483/6347/3799/57214/3064/27347/51719/6330/7402/91404/2745/1804/375346/9472/4067/596/3759/2641/2040/3746/2332/57620/79026/255738/2534/81/825/5350/196527/6781/10859/9943/6324/9455/57628/776/3356/5027/4644/10142/3736/782/116/388591/7225/5774/785/477/6387/6352/775/7533/1272/3781/81831/5311/3200/5728/6262/6327/84959/84502/219527/637…	87
GO:1905332	positive regulation of morphogenesis of an epithelium	13/3204	33/18493	0.00224606	0.0304899	0.0243146	6495/2668/55366/3217/186/30812/2475/6239/26585/51804/7849/51548/2625	13
GO:0003333	amino acid transmembrane transport	26/3204	86/18493	0.00226311	0.0305887	0.0243934	54407/8604/117247/23657/6533/27347/83733/81539/6512/23204/6506/9152/23428/151258/6509/10550/55117/477/6507/57030/3766/6534/55238/10630/6535/6542	26
GO:1903725	regulation of phospholipid metabolic process	26/3204	86/18493	0.00226311	0.0305887	0.0243934	2170/2185/9314/9306/29062/1236/8651/4067/9655/2261/8897/221395/5587/3815/3356/3667/376497/22863/9110/5156/3949/8835/30837/2322/5747/2046	26
GO:1904019	epithelial cell apoptotic process	31/3204	108/18493	0.00228304	0.0307915	0.0245551	2244/6934/889/4760/10891/10266/7057/284/6347/7072/356/1870/2475/2309/2243/196527/6431/7048/27250/5054/6789/204851/1285/6424/5925/6262/4217/1869/677/2625/6272	31
GO:0002062	chondrocyte differentiation	33/3204	117/18493	0.00230365	0.0310027	0.0247235	55553/4208/5915/871/4856/864/860/8817/2736/7046/392255/8091/54360/2261/64764/26585/1432/4088/7048/80856/4153/5741/5744/2254/654/3207/7227/399979/55959/309/50515/7373/4880	33
GO:1901991	negative regulation of mitotic cell cycle phase transition	49/3204	191/18493	0.0023209	0.0311677	0.0248551	9314/29883/1874/11073/79960/56984/2033/55031/6659/5347/246175/9337/6118/7756/6347/1026/4194/8091/596/79577/9978/10217/678/4193/60561/6500/7175/1027/123879/7029/79791/85456/1017/5311/5728/7465/5925/138151/4850/1869/835/677/699/84101/2146/25946/79027/9125/84861	49
GO:0007548	sex differentiation	65/3204	268/18493	0.00234972	0.0314872	0.0251099	8626/5241/25836/10371/5926/55366/6874/9353/51742/836/1602/10370/3157/128637/23411/25976/4762/22862/8204/30812/6943/4040/867/5087/7046/8322/157506/596/2309/8894/5781/22836/7110/3815/51804/4323/92/6716/91/4090/116/558/1515/84159/5156/2099/4257/6299/2254/835/2295/9757/654/58524/599/3021/55636/2625/3207/7301/117/5914/2296/9125/8743	65
GO:0030307	positive regulation of cell growth	43/3204	163/18493	0.00236705	0.0315118	0.0251295	23394/2185/23327/1654/84678/55031/9699/57154/54617/102/1982/7046/22902/1906/4803/51616/9472/596/2475/552/23404/4323/7224/57698/9175/6868/6387/6857/6197/8482/4131/3984/84275/3021/136319/4137/2335/84258/23025/2137/6195/9423/84861	43
GO:0001101	response to acid chemical	78/3204	332/18493	0.00236972	0.0315118	0.0251295	2170/5563/2185/5915/6495/6256/9314/928/3673/23677/2042/2729/8649/53335/836/22943/10891/5581/2743/493/171023/1196/112/6532/429/64506/1278/7049/1236/1906/340485/6319/1281/4968/8322/8651/1290/4067/23304/1385/2475/27/2534/22849/3658/552/56034/5737/6678/6506/6198/8867/9227/8324/80310/7494/19/1374/5156/3949/5311/5562/58528/143686/1869/6096/654/339479/7097/7292/50801/5536/5914/26012/2867/5753/54331/84861	78
GO:1904888	cranial skeletal system development	21/3204	65/18493	0.00237796	0.0315118	0.0251295	4208/8626/6495/25836/2778/79977/4762/860/7046/5396/157506/51804/4323/4088/4325/7048/51715/4087/158326/5156/50515	21
GO:0046621	negative regulation of organ growth	14/3204	37/18493	0.00241192	0.0315118	0.0251295	3720/23286/6532/60485/55841/4211/7048/6789/5728/5600/7161/5747/2539/2931	14
GO:2000648	positive regulation of stem cell proliferation	14/3204	37/18493	0.00241192	0.0315118	0.0251295	4054/3091/7101/3192/4072/5788/7976/8091/5080/7066/51548/342371/27185/1813	14
GO:0010888	negative regulation of lipid storage	9/3204	19/18493	0.00241198	0.0315118	0.0251295	4792/3685/114882/3690/5771/19/51099/5467/57104	9
GO:0021756	striatum development	9/3204	19/18493	0.00241198	0.0315118	0.0251295	5915/23657/93986/220/64919/26050/152789/1813/85358	9
GO:0032011	ARF protein signal transduction	9/3204	19/18493	0.00241198	0.0315118	0.0251295	10982/10564/9448/23362/57221/26269/8729/5662/9266	9
GO:0032012	regulation of ARF protein signal transduction	9/3204	19/18493	0.00241198	0.0315118	0.0251295	10982/10564/9448/23362/57221/26269/8729/5662/9266	9
GO:0048486	parasympathetic nervous system development	9/3204	19/18493	0.00241198	0.0315118	0.0251295	3212/6495/10371/2668/6405/104/8828/89797/8929	9
GO:0060216	definitive hemopoiesis	9/3204	19/18493	0.00241198	0.0315118	0.0251295	6886/7049/865/4211/678/613/204851/3213/8076	9
GO:0090190	positive regulation of branching involved in ureteric bud morphogenesis	9/3204	19/18493	0.00241198	0.0315118	0.0251295	6495/2668/55366/3217/186/30812/26585/51804/7849	9
GO:0030330	DNA damage response signal transduction by p53 class mediator	30/3204	104/18493	0.00245062	0.0318955	0.0254355	29883/1874/2033/6659/246175/9337/23411/1026/4194/2309/1859/960/4193/22925/4646/1027/7029/8444/85456/1017/1655/56950/4850/1869/835/6615/25946/6672/9100/9125	30
GO:0048565	digestive tract development	36/3204	131/18493	0.00245154	0.0318955	0.0254355	8626/5915/25836/55366/639/3091/1543/2294/2736/429/6943/1026/27031/1281/596/60485/56034/3815/55036/4088/7048/348093/688/57669/4087/5125/93649/5156/6299/3691/2254/5925/2295/8642/5753/79827	36
GO:0034284	response to monosaccharide	51/3204	201/18493	0.00246057	0.0319466	0.0254762	5563/2185/2044/4221/3673/2729/6934/25942/3091/836/6434/6659/4760/10891/5581/125111/7057/415116/10135/5208/3799/4041/9448/130399/222546/8660/2641/50507/2309/84522/252983/6678/2901/6198/7048/285/4087/1515/7494/3939/51714/55638/9572/1285/7776/5562/5728/8938/10497/5467/387597	51
GO:0043090	amino acid import	11/3204	26/18493	0.00249073	0.0322045	0.0256819	23657/6529/23204/6506/9152/10550/477/6507/57030/3766/6542	11
GO:0061217	regulation of mesonephros development	11/3204	26/18493	0.00249073	0.0322045	0.0256819	6495/2668/55366/3217/186/4070/30812/26585/51804/7849/2625	11
GO:0032868	response to insulin	63/3204	259/18493	0.00252271	0.0325436	0.0259524	2170/10890/2729/6667/526/2887/23411/6429/51762/9550/6599/114882/55023/64506/130399/3480/8660/8651/4067/255738/2475/5771/2309/252983/5781/5286/29904/5350/8850/9365/6431/8473/6198/9847/1176/4644/1979/3667/64397/376497/7494/2549/8835/4218/5728/30837/528/143686/142/5140/6654/677/7097/84275/2693/6464/2101/140710/23189/1978/6272/2931/8743	63
GO:0014032	neural crest cell development	24/3204	78/18493	0.00253256	0.0325436	0.0259524	10371/2668/3091/9839/8092/2637/10512/30812/10505/1906/54910/157506/6405/84541/2066/57556/8482/8828/90/5594/10509/309/2296/8929	24
GO:0061333	renal tubule morphogenesis	24/3204	78/18493	0.00253256	0.0325436	0.0259524	4208/6495/2668/55366/3217/342184/186/4070/30812/6943/5087/596/26585/2719/51804/26249/7849/56998/2246/6299/5311/2625/3207/8642	24
GO:0007632	visual behavior	18/3204	53/18493	0.00256658	0.0327844	0.0261444	23259/3091/4212/85461/27020/3845/8704/23657/1385/3269/2475/4204/3815/6506/5896/1141/477/1813	18
GO:0036092	phosphatidylinositol-3-phosphate biosynthetic process	18/3204	53/18493	0.00256658	0.0327844	0.0261444	8817/2252/9846/8660/2261/4952/5781/5286/9365/10818/8867/3667/200576/2246/2549/2254/5291/2322	18
GO:0050806	positive regulation of synaptic transmission	42/3204	159/18493	0.00257081	0.0327844	0.0261444	2185/25769/10059/27020/7101/5581/154/5270/9699/3799/8029/6809/2332/1385/4204/57555/22930/6547/2898/347730/776/1141/1742/9378/116/23373/2043/4355/6857/6507/55607/5594/5728/22941/8938/140730/23025/1813/85358/10497/9783/5649	42
GO:0034198	cellular response to amino acid starvation	16/3204	45/18493	0.00257225	0.0327844	0.0261444	54407/1026/5599/355/2475/5587/154743/5594/58528/143686/4217/8678/54468/9681/81929/1611	16
GO:0032872	regulation of stress-activated MAPK cascade	58/3204	235/18493	0.00258145	0.0328348	0.0261845	2185/8312/7786/260425/4221/2122/10371/9043/22943/10771/9839/6188/9448/10125/1236/3480/1906/392255/355/54910/8322/2074/56940/8325/7855/4215/64853/2898/9175/114609/27250/140885/8324/2043/10550/389432/5911/6885/142679/5594/10746/23236/55504/4293/4217/8600/23328/2218/10333/7498/84451/6416/768211/9770/50488/91862/4296/1856	58
GO:0072078	nephron tubule morphogenesis	23/3204	74/18493	0.00266776	0.0337952	0.0269505	6495/2668/55366/3217/342184/186/4070/30812/6943/5087/596/26585/2719/51804/26249/7849/56998/2246/6299/5311/2625/3207/8642	23
GO:0072395	signal transduction involved in cell cycle checkpoint	23/3204	74/18493	0.00266776	0.0337952	0.0269505	29883/1874/2033/6659/5347/246175/9337/1026/4194/4193/60561/8555/79184/1027/7029/85456/1017/4850/1869/835/51720/25946/9125	23
GO:0001704	formation of primary germ layer	33/3204	118/18493	0.0026761	0.0338324	0.0269801	9314/3673/6886/3685/6657/123169/22943/8320/2294/8289/60412/9421/3690/8646/1290/8091/79577/55614/4323/4088/57669/4087/8324/5573/90/3691/1289/2335/83595/6615/3207/23135/2296	33
GO:0021542	dentate gyrus development	8/3204	16/18493	0.00276291	0.0347195	0.0276875	63974/7101/4760/4009/66000/1021/2018/5728	8
GO:0030252	growth hormone secretion	8/3204	16/18493	0.00276291	0.0347195	0.0276875	8874/5781/116/51714/8997/2693/55636/1813	8
GO:0034755	iron ion transmembrane transport	8/3204	16/18493	0.00276291	0.0347195	0.0276875	23516/79689/4891/81894/8301/30061/93380/261729	8
GO:1903747	regulation of establishment of protein localization to mitochondrion	22/3204	70/18493	0.00280048	0.0350948	0.0279868	9530/8626/7529/27113/5599/596/7855/7332/7323/55294/10971/7029/7533/5562/841/1869/4137/54543/7161/10055/665/2931	22
GO:0010639	negative regulation of organelle organization	88/3204	384/18493	0.0028122	0.0350948	0.0279868	9530/29767/57379/3720/51366/4591/9353/25942/56984/5253/10059/146057/5962/10891/3192/5347/89795/54454/23081/25913/23411/7756/4070/4117/6497/9700/3159/140775/57489/79822/2072/23122/899/10201/27124/1859/79929/4204/84079/1789/8850/10111/55818/6418/832/54464/64282/664/55604/395/120/23271/7111/4171/7175/5573/54880/114088/375189/25842/51474/55607/146691/79598/112476/4134/142/22919/157922/8678/11078/699/…	88
GO:0010771	negative regulation of cell morphogenesis involved in differentiation	28/3204	96/18493	0.00281521	0.0350948	0.0279868	10371/9353/9693/4070/10512/10505/22902/54910/6405/55435/81/7224/57556/7225/2045/57142/7533/8482/10509/5728/84894/2192/4804/1949/5747/9423/23189/4038	28
GO:0120162	positive regulation of cold-induced thermogenesis	28/3204	96/18493	0.00281521	0.0350948	0.0279868	64641/2697/2778/5746/10891/154/2887/7852/3480/9658/155/6319/2628/3662/56034/8473/55818/79071/116/51548/1240/7067/5565/23135/133522/51087/8929/3934	28
GO:0045879	negative regulation of smoothened signaling pathway	12/3204	30/18493	0.00282905	0.0351209	0.0280076	51684/5270/860/283219/8646/2719/26146/64399/27164/730094/5925/23295	12
GO:0051491	positive regulation of filopodium assembly	12/3204	30/18493	0.00282905	0.0351209	0.0280076	23613/2823/7046/1236/2332/54874/57451/10178/9750/6624/8976/5064	12
GO:0002791	regulation of peptide secretion	104/3204	465/18493	0.00283465	0.0351209	0.0280076	2244/8874/9727/192683/2044/3747/55366/10802/6934/3091/3329/9515/27086/10059/4856/6659/4760/5581/186/284/415116/51762/5208/291/9254/3799/4041/9448/130399/56253/10125/222546/1236/8660/384/8651/4067/2641/5991/7855/285381/777/84522/252983/1803/23586/5781/57555/2243/22900/10859/7849/1432/11069/3709/776/5027/116/3667/9575/23705/27202/7494/6352/23435/775/23086/5066/3790/51714/1374/8997/6566/55638/3556/9…	104
GO:0098742	cell-cell adhesion via plasma-membrane adhesion molecules	65/3204	270/18493	0.00283975	0.0351209	0.0280076	56146/56139/9314/56136/1006/347902/81607/56137/1009/27020/56134/56138/56141/56135/8763/56147/56142/137075/56143/9752/56140/56144/56145/57453/64101/7412/25945/5818/10893/55714/386724/1824/22865/214/57451/57526/1432/10205/7048/10178/9080/9378/23705/2196/152330/54510/1825/3556/64881/90/27032/5291/56131/1823/92211/84962/54825/1952/128434/9073/8642/3683/23654/22859/137970	65
GO:0016079	synaptic vesicle exocytosis	34/3204	123/18493	0.00286694	0.0353872	0.02822	23513/1129/5908/9515/10059/27445/9699/116443/6809/2332/341359/10814/22930/26059/2901/776/3356/1141/5027/8867/26258/114088/6857/112476/5582/6853/84258/140730/23025/1813/10497/9783/28964/815	34
GO:0051261	protein depolymerization	30/3204	105/18493	0.00287275	0.0353891	0.0282215	29767/344148/9793/146057/5962/89795/81551/444/23122/57553/79929/11034/832/55604/8867/120/23271/7111/23616/51474/1073/9948/157922/11078/126731/136319/9829/10297/50853/6456	30
GO:0006661	phosphatidylinositol biosynthetic process	39/3204	146/18493	0.0028941	0.0355821	0.0283754	83394/51552/8817/2252/5277/9846/8660/84725/2261/8897/4952/27124/8395/5781/5286/5867/9365/10818/3356/8867/5281/22908/3667/376497/200576/2246/9110/2549/94005/79837/2254/5728/5291/65977/10026/1040/2322/377/128869	39
GO:0030278	regulation of ossification	49/3204	193/18493	0.00291288	0.0357427	0.0285035	4208/8626/2185/3516/4221/25836/115908/3091/64093/2778/22943/154/51684/57154/860/6497/4041/5087/8646/596/3400/10140/169200/26585/196527/5587/9365/56172/1432/7166/92/56998/4088/4090/5027/54880/1021/90/5594/5741/1655/6096/654/3727/2101/9770/5747/4880/4038	49
GO:0010812	negative regulation of cell-substrate adhesion	21/3204	66/18493	0.00292784	0.035856	0.0285938	4221/604/7057/4070/9448/340485/23122/8322/56940/55435/81/6695/4323/395/285/5921/8324/5054/5728/2192/23189	21
GO:0008016	regulation of heart contraction	54/3204	217/18493	0.00294267	0.0359672	0.0286826	1756/1129/10371/5144/2697/10052/125111/493/481/186/2643/491/6330/444/1906/3759/8913/552/8654/5350/1824/6781/6324/490/6547/11149/4193/3709/776/10142/3775/388591/477/775/3781/3708/6263/6262/23493/7067/6327/157378/4205/1760/10699/3784/3777/1813/8862/7068/60598/6271/4880/2931	54
GO:0050673	epithelial cell proliferation	95/3204	420/18493	0.00297036	0.0361719	0.0288457	4208/8626/5241/6495/4221/1028/6776/55366/6667/3091/889/6657/4856/185/3664/864/7057/23411/4070/11171/6347/687/2252/10000/93986/7049/7046/3690/4893/441478/60485/79577/2475/5080/252983/255324/6239/10765/55294/2719/5587/6431/3815/51804/6678/10818/4323/5654/92/5828/4088/135228/5613/8324/728/6868/2246/64919/27202/57142/1027/6387/7494/1021/6352/51548/2099/6774/8828/5594/79805/9572/2254/4163/5728/5291/30…	95
GO:0097048	dendritic cell apoptotic process	6/3204	10/18493	0.00298886	0.0361719	0.0288457	9693/1236/4067/10859/558/6387	6
GO:2000668	regulation of dendritic cell apoptotic process	6/3204	10/18493	0.00298886	0.0361719	0.0288457	9693/1236/4067/10859/558/6387	6
GO:0002093	auditory receptor cell morphogenesis	7/3204	13/18493	0.00301143	0.0361719	0.0288457	23513/79955/4647/84189/9750/11078/51057	7
GO:0014889	muscle atrophy	7/3204	13/18493	0.00301143	0.0361719	0.0288457	84676/3600/10891/2628/2475/3658/6198	7
GO:0040034	regulation of development heterochronic	7/3204	13/18493	0.00301143	0.0361719	0.0288457	3516/7101/5270/429/5080/28514/2254	7
GO:0043201	response to leucine	7/3204	13/18493	0.00301143	0.0361719	0.0288457	10891/23304/2475/6198/58528/143686/84861	7
GO:0098712	L-glutamate import across plasma membrane	7/3204	13/18493	0.00301143	0.0361719	0.0288457	23657/23204/6506/10550/477/6507/3766	7
GO:1902306	negative regulation of sodium ion transmembrane transport	7/3204	13/18493	0.00301143	0.0361719	0.0288457	23327/5581/57520/4734/27347/255738/477	7
GO:0090130	tissue migration	82/3204	355/18493	0.00305956	0.0366055	0.0291915	4208/2185/9314/3673/6776/10371/90627/154796/6667/9353/3091/889/27086/4856/7101/9839/154810/5581/79977/7057/186/23411/116150/284/8817/4070/70/11171/10982/2294/5586/2252/10000/1634/9448/7046/1906/3690/23122/23129/2475/6239/25960/1803/4204/4215/5781/5286/26585/375056/55294/5587/6781/3815/6678/7048/5829/285/57669/23616/5613/6868/2246/5793/57142/340719/2196/8828/64094/4163/5728/3037/23328/8754/51057/2…	82
GO:0090189	regulation of branching involved in ureteric bud morphogenesis	10/3204	23/18493	0.00306077	0.0366055	0.0291915	6495/2668/55366/3217/186/4070/30812/26585/51804/7849	10
GO:0006643	membrane lipid metabolic process	51/3204	203/18493	0.00306508	0.0366055	0.0291915	79993/8702/94103/10558/5515/81537/60481/2517/6785/55331/256987/124976/5277/23659/340485/2581/3696/55852/5587/57515/3815/6489/204219/10825/79071/23042/23683/256435/7915/5027/9517/5281/7368/91012/9218/64781/8707/412/142891/94005/285362/5562/259230/10026/8703/165679/80772/128869/27090/2760/10402	51
GO:0007162	negative regulation of cell adhesion	66/3204	276/18493	0.00314378	0.0374739	0.029884	58494/9314/4221/928/604/836/9306/5962/864/8763/5270/4072/7057/284/4070/5788/1493/102/9448/942/340485/23122/8322/56940/384/8651/23129/10154/441478/55824/865/9655/55435/5771/5781/81/8654/375056/10859/6695/4323/395/285/51441/57669/9750/57556/5921/8324/5054/5573/79872/6387/9231/27242/5728/5140/80380/84959/7292/5420/2192/5747/64115/23189/23654	66
GO:0030520	intracellular estrogen receptor signaling pathway	19/3204	58/18493	0.00315099	0.0374884	0.0298956	8626/8312/23054/161582/29966/8289/8085/2100/6502/865/81606/11240/79039/51569/2099/1655/142/133522/9125	19
GO:0097061	dendritic spine organization	23/3204	75/18493	0.00322803	0.0382145	0.0304747	23613/10059/85461/102/3480/26037/7804/2534/29904/51104/1742/2043/4076/8997/65981/55607/5728/22941/8976/10611/85358/5649/9762	23
GO:0090090	negative regulation of canonical Wnt signaling pathway	36/3204	133/18493	0.0032337	0.0382145	0.0304747	8312/8452/115908/84445/6934/79960/9096/8321/6657/1601/22943/84133/4040/85407/27031/9978/2309/169200/2487/26585/2719/10146/27123/1432/6789/4300/7090/8323/6424/100113407/4163/10297/27303/1856/2931/4038	36
GO:0051568	histone H3-K4 methylation	18/3204	54/18493	0.00323645	0.0382145	0.0304747	5929/26053/5926/55870/6018/57673/80335/200424/8085/2641/84193/1789/8473/2672/54880/9757/2625/11105	18
GO:0060997	dendritic spine morphogenesis	18/3204	54/18493	0.00323645	0.0382145	0.0304747	10059/102/26037/7804/29904/1742/2043/4076/8997/65981/55607/5728/22941/8976/10611/85358/5649/9762	18
GO:0018209	peptidyl-serine modification	71/3204	301/18493	0.00324699	0.0382668	0.0305163	9530/1756/5563/8312/7786/1456/375449/5144/146057/5601/22943/5581/5347/493/284/7443/51701/5586/22853/27347/51719/10000/10253/5599/1634/7046/2589/8091/5593/596/2641/2475/27124/1859/1453/960/5587/23228/56983/1432/6198/7048/10178/9175/10142/5613/3320/11011/6789/133584/6197/814/65981/85456/5594/1017/84930/9252/5562/114805/142/23012/11329/53944/5582/1760/9770/152559/9125/815/23049	71
GO:2000058	regulation of ubiquitin-dependent protein catabolic process	39/3204	147/18493	0.00329368	0.0385756	0.0307627	2185/8312/2729/11236/6613/3093/1601/5601/122809/5347/51684/57154/9817/6599/440730/26263/258010/9655/9978/28951/1453/55294/8473/4193/11011/9709/285671/7336/9529/6815/9683/5728/7337/54467/26259/23640/23274/5747/2931	39
GO:1900024	regulation of substrate adhesion-dependent cell spreading	17/3204	50/18493	0.0032955	0.0385756	0.0307627	2244/8874/4070/10562/55435/6239/81/2243/1399/55604/1398/3037/11078/2192/5747/10630/23189	17
GO:0043124	negative regulation of I-kappaB kinase/NF-kappaB signaling	15/3204	42/18493	0.00329785	0.0385756	0.0307627	6095/5494/10771/55870/23411/5495/8780/286827/22900/140885/2099/841/56957/10318/9100	15
GO:0071675	regulation of mononuclear cell migration	15/3204	42/18493	0.00329785	0.0385756	0.0307627	79647/9353/4856/7057/4067/26585/196527/1432/728/80310/5054/6387/6352/23236/1240	15
GO:0042752	regulation of circadian rhythm	28/3204	97/18493	0.00331561	0.038711	0.0308706	5563/6095/26224/23291/463/25942/5601/54551/10891/5599/1408/1385/1453/5500/9975/56938/1141/23373/5602/9572/5562/7337/6096/5582/1813/5936/2146/9967	28
GO:0006473	protein acetylation	50/3204	199/18493	0.00333595	0.0387317	0.0308871	8295/79612/5563/10933/26053/79960/25942/2033/6659/10891/26038/23338/80314/57673/23411/55677/6877/9329/7994/51200/5977/122830/51616/3662/284058/4191/4204/80218/80155/8850/8473/8648/6418/55683/157570/9575/93649/6885/9027/114799/86/9252/55209/5562/26122/27097/4137/2625/23741/55689	50
GO:0007163	establishment or maintenance of cell polarity	50/3204	199/18493	0.00333595	0.0387317	0.0308871	23513/55914/2185/5908/25932/10890/23286/154796/9793/889/154810/10090/2294/3064/10253/4752/23150/1236/22902/137886/23122/5080/22836/57698/10092/3996/9750/81609/64398/23616/6624/1740/3320/8729/9053/9231/4131/4134/7465/9826/79648/9948/51057/2625/5747/6993/286/389/23189/55691	50
GO:0007266	Rho protein signal transduction	50/3204	199/18493	0.00333595	0.0387317	0.0308871	8874/8452/9411/26084/185/11214/604/56990/22899/55200/1278/1281/55785/54848/9459/29/394/22836/221178/440107/57698/10160/10276/395/6242/9750/613/23365/23263/137735/19/8997/5741/392/9826/3984/5924/6654/2840/23268/6453/1902/4804/10630/389/9423/23189/143872/50650/2846	50
GO:0043244	regulation of protein complex disassembly	30/3204	106/18493	0.00335529	0.0388841	0.0310086	29767/146057/5962/56648/154/89795/444/3480/140775/23122/79929/11034/832/664/55604/120/23271/7111/23616/2107/51474/79443/1073/9948/157922/11078/136319/10297/23274/50853	30
GO:0060350	endochondral bone morphogenesis	22/3204	71/18493	0.00340561	0.039356	0.031385	4208/5915/871/1305/2778/860/8817/4664/2261/6781/4323/4325/7048/4153/55790/654/3207/309/5914/2296/7373/4880	22
GO:1903364	positive regulation of cellular protein catabolic process	37/3204	138/18493	0.00340859	0.039356	0.031385	2185/8312/2729/11236/9532/6613/1601/5601/122809/5962/5347/57154/9817/440730/26263/2332/9655/9978/255738/28951/1453/55294/4193/3320/9709/79589/285671/7336/3949/26234/5728/54467/26259/9810/23640/5747/2931	37
GO:0097306	cellular response to alcohol	25/3204	84/18493	0.00343301	0.039565	0.0315516	5563/9314/2770/94241/5581/3157/112/687/4040/6354/7804/2309/113/3658/5737/490/3709/54464/19/23209/5562/5728/7292/23367/54331	25
GO:0090287	regulation of cellular response to growth factor stimulus	67/3204	282/18493	0.00346705	0.0398839	0.0318059	3516/4221/1028/9353/5494/3091/2033/8321/1601/27020/10370/22943/51496/6498/2887/7057/186/23411/57154/4734/860/8817/11171/6497/26999/51341/10253/1634/7049/7046/3690/8322/8646/10140/25960/66000/26585/2719/5654/92/23090/4088/135228/7048/114990/348093/57556/4087/6868/2246/9110/64399/28514/387914/93649/4756/64094/6424/2254/81848/65997/7498/2625/8862/23089/55959/50515	67
GO:0006813	potassium ion transport	58/3204	238/18493	0.00348331	0.0399974	0.0318964	2185/23327/288/3747/25769/481/4734/3763/483/3799/27347/51719/1804/9472/3759/3746/285195/3750/56479/196527/343450/9943/57628/54207/776/123041/3356/10142/3775/3736/116/51305/3739/388591/3742/3769/477/3778/3790/57468/6507/3781/1017/81831/5311/479/5728/10723/3766/3751/219527/50801/9132/3784/3777/1813/3756/60598	58
GO:0045637	regulation of myeloid cell differentiation	60/3204	248/18493	0.00357214	0.0406104	0.0323853	4792/4208/2185/5929/4286/6886/29909/25942/3091/2033/10401/123169/27086/4212/2778/7057/10234/8085/4067/79577/1385/865/2475/5771/2309/169200/2551/4211/5814/55294/8850/10859/1432/7030/92/56998/7066/91/130733/28514/26523/1021/814/6774/841/5925/4850/8600/9757/84293/84959/677/3021/2101/9770/1441/133522/4343/5914/129138	60
GO:0051668	localization within membrane	38/3204	143/18493	0.00357731	0.0406104	0.0323853	10243/23513/23426/163/10802/27020/2743/481/128637/9871/23657/5788/102/3690/146395/6809/2119/3800/375056/2898/2901/64854/8867/1742/9378/2060/9863/1740/9632/3798/4218/2693/160622/85358/5649/6249/3683/4038	38
GO:0061351	neural precursor cell proliferation	38/3204	143/18493	0.00357731	0.0406104	0.0323853	6095/84678/10890/3091/2009/50937/7101/9839/2637/6532/429/6895/7976/747/10642/153241/4673/131405/2787/4067/85458/3400/5080/2309/57650/10818/3736/116/728/64399/5108/8323/2018/29127/170302/27185/1813/23654	38
GO:0034101	erythrocyte homeostasis	33/3204	120/18493	0.00357749	0.0406104	0.0323853	55553/5926/6886/3091/604/836/51341/7049/4891/4067/9991/5771/2309/221395/3658/3815/1432/92/91/4090/558/1021/8444/6774/5316/5925/7067/677/10107/2625/2539/84456/129138	33
GO:0051966	regulation of synaptic transmission glutamatergic	21/3204	67/18493	0.00358051	0.0406104	0.0323853	4208/2185/22943/5270/8029/57555/22930/2898/3356/9378/116/477/6857/2915/22941/2917/23025/1813/85358/2916/5649	21
GO:0061515	myeloid cell development	21/3204	67/18493	0.00358051	0.0406104	0.0323853	55553/5926/2313/6886/2033/27086/604/51341/4891/9991/221395/5781/4211/55294/10859/3815/8600/7097/25946/2539/84456	21
GO:0007033	vacuole organization	41/3204	157/18493	0.00358212	0.0406104	0.0323853	57533/51552/94241/57154/54664/79158/140775/6048/137886/51361/25782/5899/256471/8897/54734/22930/7942/4647/27072/5027/51715/23710/11345/200576/22863/55062/19/23673/8406/55054/79837/55102/165324/8678/23400/23130/147007/58476/157807/90678/1203	41
GO:0045862	positive regulation of proteolysis	81/3204	352/18493	0.00359007	0.0406268	0.0323984	2185/8312/1654/27113/2729/23291/11236/9532/6613/84236/3329/1601/836/5601/122809/5347/23411/57154/9817/26999/6188/444/130399/1612/440730/340485/355/4803/356/7133/4067/26263/2332/55122/9655/9978/28951/2534/1453/3818/825/55294/22900/8473/1432/4323/4193/4088/317/8301/8797/2043/10550/9709/10845/285671/7336/6774/1285/5728/841/54467/4217/112399/26259/9810/8754/7498/84168/4137/2335/83595/10318/2192/4804/…	81
GO:0006023	aminoglycan biosynthetic process	31/3204	111/18493	0.00361684	0.0407089	0.0324639	8702/26035/10057/90161/23169/1463/10090/284/8704/222537/64711/9334/57214/1634/8509/93010/11041/9956/9953/2719/9394/1462/3038/9672/92370/55790/3037/2683/8703/10402/50515	31
GO:0030218	erythrocyte differentiation	31/3204	111/18493	0.00361684	0.0407089	0.0324639	55553/5926/6886/3091/604/836/51341/7049/4891/4067/9991/5771/2309/221395/3815/1432/92/91/4090/1021/8444/6774/5316/5925/7067/677/10107/2625/2539/84456/129138	31
GO:0043200	response to amino acid	31/3204	111/18493	0.00361684	0.0407089	0.0324639	6495/23677/2729/8649/53335/836/10891/2743/64506/1278/1906/1281/8651/1290/4067/23304/1385/2475/2534/22849/3658/56034/6506/6198/80310/7494/5156/58528/143686/26012/84861	31
GO:1903706	regulation of hemopoiesis	94/3204	418/18493	0.00371383	0.0417256	0.0332746	4792/4208/2185/5929/4286/6886/54517/29909/639/25942/3091/2033/10401/123169/27086/3600/604/4212/2778/11051/864/7057/64332/5788/1493/2736/942/10125/10234/9580/8085/8651/441478/4067/79577/1385/865/9655/2475/5771/2309/3662/169200/2551/4211/5814/286410/55294/8850/10859/678/1432/7030/4323/5896/92/56998/7066/7048/91/51441/130733/4005/558/28514/26523/7494/1021/814/6774/841/342371/5925/4850/8600/9757/6654…	94
GO:0071774	response to fibroblast growth factor	39/3204	148/18493	0.0037396	0.0418105	0.0333423	2729/51552/27020/7057/860/8817/8036/23768/6347/2252/10253/867/7072/131405/3746/2261/10765/55614/960/5781/3730/7073/9365/678/10818/23769/2246/64399/387914/6352/9702/5594/5741/2254/81848/677/2625/8862/55959	39
GO:0031571	mitotic G1 DNA damage checkpoint	20/3204	63/18493	0.00374892	0.0418105	0.0333423	29883/1874/2033/6659/246175/9337/6118/1026/4194/4193/1027/7029/79791/85456/1017/4850/1869/835/25946/9125	20
GO:0043550	regulation of lipid kinase activity	20/3204	63/18493	0.00374892	0.0418105	0.0333423	2185/9314/9306/29062/1236/8651/4067/9655/2261/5587/3815/3667/22863/5156/8835/30837/5925/2322/5747/2046	20
GO:0044819	mitotic G1/S transition checkpoint	20/3204	63/18493	0.00374892	0.0418105	0.0333423	29883/1874/2033/6659/246175/9337/6118/1026/4194/4193/1027/7029/79791/85456/1017/4850/1869/835/25946/9125	20
GO:0007369	gastrulation	46/3204	181/18493	0.00375479	0.0418105	0.0333423	8452/9314/3673/6886/3685/154796/6657/123169/22943/8320/2294/8289/4041/60412/4040/9421/3690/27031/23122/8646/1290/8091/79577/55614/2719/56983/10818/4323/92/4088/7048/57669/4087/8324/5573/90/3691/1289/2335/83595/6615/3207/8862/23135/1856/2296	46
GO:0010256	endomembrane system organization	91/3204	403/18493	0.00376813	0.0418845	0.0334014	115548/8874/288/8436/10890/57088/8675/50807/29993/5347/5270/128637/7443/7852/5788/9648/80124/5359/3064/9950/23353/10564/137886/50999/51361/25782/23122/55113/163590/356/79895/50487/1385/84522/1453/5205/23204/8674/7110/196527/22930/64225/5587/54874/282679/8027/60561/65055/57698/51014/9519/80856/5027/8867/23271/10142/745/64398/149371/1182/400/57142/23435/19/9529/5594/8729/10228/7251/5869/1289/5728/2…	91
GO:0010876	lipid localization	89/3204	393/18493	0.00380002	0.0421433	0.0336078	4792/2170/83394/6256/4864/3685/2587/185/7057/186/23411/116150/2169/8204/114882/124976/4040/64137/8529/130399/4833/7069/1906/3690/3069/8660/26031/8322/84725/79895/50487/51012/55754/255738/6579/55852/5771/57614/2182/10765/5205/6578/26207/5781/114884/7110/196527/286410/55294/23250/81579/26020/8648/4232/6198/22925/5027/114876/10396/9227/376497/4481/5825/28232/54677/19/1374/23673/5322/51474/7436/3949/…	89
GO:0019216	regulation of lipid metabolic process	88/3204	388/18493	0.00381453	0.0421433	0.0336078	2170/5563/2185/6256/6095/94103/9314/6667/79718/25942/23054/185/60481/9306/10891/5581/3157/1543/23411/29062/5163/51360/7069/1236/57546/6319/8660/80207/8651/55066/4067/83643/1385/9655/2261/8897/2475/221395/51280/552/4862/9975/55294/5587/3815/4802/2672/8648/79071/1595/3356/10613/3667/376497/22863/2246/64919/9110/6309/13/19/1374/5156/9926/3949/9572/142891/80205/51099/27242/8835/5562/30837/5925/5140/7…	88
GO:0006367	transcription initiation from RNA polymerase II promoter	47/3204	186/18493	0.00385652	0.0421433	0.0336078	1871/2908/3516/5915/5241/6256/6095/6874/1602/2967/7101/29079/10891/860/9969/55534/6877/51003/1026/2649/10923/51616/112950/1870/2100/1385/865/4306/9975/8850/892/56998/4929/2099/9572/9282/29959/9794/23493/7067/6096/7596/2101/5467/7068/5914/9967	47
GO:0072088	nephron epithelium morphogenesis	23/3204	76/18493	0.00388393	0.0421433	0.0336078	6495/2668/55366/3217/342184/186/4070/30812/6943/5087/596/26585/2719/51804/26249/7849/56998/2246/6299/5311/2625/3207/8642	23
GO:0051235	maintenance of location	74/3204	318/18493	0.00388413	0.0421433	0.0336078	4792/1756/2185/288/7529/3685/57120/10945/5144/3192/5581/51684/23411/9817/10523/8204/7782/5788/114882/57214/3064/23353/130399/1236/3690/4188/356/9472/4067/5771/81573/825/5350/55294/4601/2901/3099/4232/3709/2317/10956/3356/6500/5027/4644/10142/83660/4481/477/375189/775/19/5311/3708/51099/6263/10210/6262/57030/6653/84959/84502/23568/6373/55636/1813/3098/5467/6672/2760/309/2867/57104/11014	74
GO:0060047	heart contraction	59/3204	244/18493	0.00388511	0.0421433	0.0336078	1756/23327/1129/10371/5144/2697/10059/10052/493/481/186/2643/491/70/6330/444/1906/3759/2475/8913/552/8654/5350/1824/6781/6324/490/6547/11149/4193/3709/776/4090/10142/3775/388591/477/775/3781/3708/6263/6323/6262/23493/7067/6327/157378/4205/1760/10699/3784/3777/1813/8862/7068/60598/6271/4880/2931	59
GO:0046677	response to antibiotic	75/3204	323/18493	0.00388933	0.0421433	0.0336078	4208/2185/9314/2770/3747/8639/3329/836/94241/5581/1543/23411/51167/70/112/6188/3840/116443/7412/867/1906/4968/6354/596/51765/2309/84522/2534/10765/113/6678/8428/4193/3709/6198/54464/1141/10276/64854/664/140885/116/7225/80310/3320/558/1398/1027/3939/80854/57578/6507/6774/5741/3716/5562/5728/841/4217/8678/57332/8754/2625/5536/1813/23367/2146/117/23135/1663/2539/5914/761/4880/3934	75
GO:0017156	calcium ion regulated exocytosis	40/3204	153/18493	0.00389525	0.0421433	0.0336078	23513/1129/5908/192683/9515/10059/27445/9699/116443/6809/9341/2332/341359/8913/10814/22930/26059/2901/11069/776/3356/1141/5027/8867/55114/26258/114088/6857/112476/8938/5582/6853/84258/140730/23025/1813/10497/9783/28964/815	40
GO:0016577	histone demethylation	12/3204	31/18493	0.00389762	0.0421433	0.0336078	84678/3720/5253/221037/23081/10765/55818/84159/22992/84864/23133/23135	12
GO:0021772	olfactory bulb development	12/3204	31/18493	0.00389762	0.0421433	0.0336078	10371/9353/7101/8320/6497/2066/389549/23287/6299/27164/170302/55636	12
GO:0043552	positive regulation of phosphatidylinositol 3-kinase activity	12/3204	31/18493	0.00389762	0.0421433	0.0336078	2185/1236/4067/2261/5587/3815/3667/22863/5156/2322/5747/2046	12
GO:0048011	neurotrophin TRK receptor signaling pathway	12/3204	31/18493	0.00389762	0.0421433	0.0336078	836/186/26999/10253/4803/5781/66000/10818/4692/6654/4804/6272	12
GO:0031623	receptor internalization	30/3204	107/18493	0.00390489	0.0421433	0.0336078	23513/928/163/1173/22943/10266/284/4734/3690/146395/2332/255738/26585/10859/2890/347730/64854/8867/284654/1742/8301/2060/6311/9863/6424/157/7037/1813/8862/6456	30
GO:0048640	negative regulation of developmental growth	30/3204	107/18493	0.00390489	0.0421433	0.0336078	10371/3720/23286/53335/154/10512/6532/10505/85407/54910/6405/60485/2261/55841/4211/7048/57556/2045/57142/6789/8482/8835/10509/5728/5600/7161/5747/2539/9423/2931	30
GO:0072413	signal transduction involved in mitotic cell cycle checkpoint	19/3204	59/18493	0.0039059	0.0421433	0.0336078	29883/1874/2033/6659/246175/9337/1026/4194/4193/60561/1027/7029/85456/1017/4850/1869/835/25946/9125	19
GO:1902402	signal transduction involved in mitotic DNA damage checkpoint	19/3204	59/18493	0.0039059	0.0421433	0.0336078	29883/1874/2033/6659/246175/9337/1026/4194/4193/60561/1027/7029/85456/1017/4850/1869/835/25946/9125	19
GO:1902403	signal transduction involved in mitotic DNA integrity checkpoint	19/3204	59/18493	0.0039059	0.0421433	0.0336078	29883/1874/2033/6659/246175/9337/1026/4194/4193/60561/1027/7029/85456/1017/4850/1869/835/25946/9125	19
GO:0009749	response to glucose	48/3204	191/18493	0.00395294	0.0425775	0.033954	5563/2185/2044/4221/2729/6934/25942/3091/836/6434/6659/4760/10891/5581/125111/7057/415116/5208/3799/4041/9448/130399/222546/8660/2641/50507/2309/84522/252983/2901/6198/7048/285/4087/1515/7494/3939/51714/55638/9572/1285/7776/5562/5728/8938/10497/5467/387597	48
GO:0070304	positive regulation of stress-activated protein kinase signaling cascade	44/3204	172/18493	0.00397009	0.0426887	0.0340427	2185/8312/7786/10371/9043/22943/9839/6188/10125/1236/1906/392255/54910/8322/2074/56940/4067/8325/7855/4215/9175/114609/8324/2043/10550/389432/6885/142679/10746/23236/55504/4293/4217/8600/23328/10333/7498/84451/6416/768211/9770/50488/4296/1856	44
GO:0009746	response to hexose	49/3204	196/18493	0.00404413	0.0434103	0.0346181	5563/2185/2044/4221/2729/6934/25942/3091/836/6434/6659/4760/10891/5581/125111/7057/415116/10135/5208/3799/4041/9448/130399/222546/8660/2641/50507/2309/84522/252983/2901/6198/7048/285/4087/1515/7494/3939/51714/55638/9572/1285/7776/5562/5728/8938/10497/5467/387597	49
GO:0015711	organic anion transport	102/3204	460/18493	0.00405874	0.0434925	0.0346837	54407/2170/83394/6256/8604/10057/7504/117247/23169/9197/159963/7057/186/51167/256987/606495/23657/291/114882/6533/115111/27347/8529/7069/8884/1906/29957/8660/6529/84725/83733/79895/50487/113278/9120/23443/81539/51012/55754/6579/2182/253512/5205/6512/552/6578/26207/23204/114884/22930/286410/23250/8671/81579/8648/6506/6198/22925/9152/23428/114789/5027/10396/151258/6509/376497/10550/55117/5825/477/2…	102
GO:0060491	regulation of cell projection assembly	45/3204	177/18493	0.00408731	0.0437238	0.0348681	79647/23613/26053/9353/2823/25940/5962/989/4070/4117/3064/7046/1236/79734/55909/57489/153241/9662/2332/2475/5205/49856/54874/3815/57451/55704/832/85464/10178/5027/688/642273/9750/6624/344022/5337/55607/79598/4134/23300/8976/51057/5420/5064/23189	45
GO:0034599	cellular response to oxidative stress	68/3204	289/18493	0.00415609	0.0443353	0.0353558	5563/9314/3747/25942/3091/8321/5601/94241/10891/23411/2643/23657/5163/6188/5599/1612/29957/596/51765/154807/50507/2309/2534/2119/55294/5587/8428/135112/5893/79912/4193/22925/10276/4929/5829/664/140885/7225/80310/10550/558/1398/4358/5156/9529/4257/5594/1017/5311/6648/5562/142/4217/8678/253827/57332/10333/10587/4137/5536/23400/2146/23135/133522/2539/84181/140809/3934	68
GO:0006475	internal protein amino acid acetylation	42/3204	163/18493	0.00418622	0.0443353	0.0353558	8295/10933/26053/79960/25942/2033/10891/26038/23338/80314/57673/23411/55677/6877/9329/7994/51200/5977/51616/3662/284058/4191/4204/80218/8850/8473/8648/6418/55683/9575/93649/6885/9027/86/9252/55209/26122/27097/4137/2625/23741/55689	42
GO:0051147	regulation of muscle cell differentiation	46/3204	182/18493	0.00419852	0.0443353	0.0353558	55553/4208/3516/9043/4856/50937/11214/22943/23411/2294/6895/1906/9472/596/26263/2475/4204/84193/26585/84466/3815/10818/1432/4323/80306/348093/9750/27250/8324/28514/93649/7494/93166/6648/2254/91653/9794/23493/79365/4205/1760/5600/5936/2146/2539/2931	46
GO:0090132	epithelium migration	80/3204	349/18493	0.00420707	0.0443353	0.0353558	4208/2185/9314/3673/6776/10371/90627/154796/6667/9353/3091/889/27086/4856/7101/9839/154810/5581/79977/7057/186/23411/116150/284/8817/4070/11171/10982/5586/2252/10000/1634/9448/7046/1906/3690/23122/23129/2475/6239/25960/1803/4204/4215/5781/5286/26585/375056/55294/5587/6781/3815/6678/7048/5829/285/57669/23616/5613/6868/2246/5793/57142/340719/2196/8828/64094/4163/5728/3037/23328/8754/51057/2625/9186…	80
GO:0014812	muscle cell migration	29/3204	103/18493	0.00421376	0.0443353	0.0353558	4208/6495/79647/3673/9353/4856/10891/780/9732/3690/55909/596/50507/84466/51804/4193/6198/10092/10276/80310/5054/93649/1398/6352/2254/3037/6653/1902/5467	29
GO:0001837	epithelial to mesenchymal transition	36/3204	135/18493	0.00421992	0.0443353	0.0353558	3516/2042/5515/3091/1601/8320/8092/11171/4040/7049/7046/23122/8091/84541/2475/26585/4088/7048/114990/23462/57669/27250/4087/57142/10439/90/1655/9231/5728/3037/23493/2295/6615/2146/10630/2296	36
GO:0043484	regulation of RNA splicing	36/3204	135/18493	0.00421992	0.0443353	0.0353558	55796/56853/10921/60680/10181/4154/10179/84530/6434/3192/6429/10657/57396/1196/23076/51755/51341/2334/7072/11189/9991/2332/140890/79026/1859/29896/6431/55696/282996/54715/22927/58517/10922/1655/5936/9967	36
GO:0001941	postsynaptic membrane organization	14/3204	39/18493	0.00423233	0.0443353	0.0353558	10243/23613/2668/2743/23657/64101/2119/57555/1742/9378/9863/85358/5649/4038	14
GO:0043277	apoptotic cell clearance	14/3204	39/18493	0.00423233	0.0443353	0.0353558	51552/3685/7057/6347/717/3690/55113/84466/558/375033/8678/146722/7301/5914	14
GO:0051590	positive regulation of neurotransmitter transport	14/3204	39/18493	0.00423233	0.0443353	0.0353558	10059/6532/6529/23204/22930/776/5027/6857/8600/8938/23025/1813/8862/10497	14
GO:0016331	morphogenesis of embryonic epithelium	39/3204	149/18493	0.00423604	0.0443353	0.0353558	23513/8626/6495/84678/2668/115908/3091/8321/6659/9839/51684/79977/8092/6497/8289/2736/30812/4040/57534/9421/7976/27031/54910/131405/157506/26585/7798/51804/7849/317/220/57669/6789/8323/2926/2625/1856/5914/23654	39
GO:0002067	glandular epithelial cell differentiation	16/3204	47/18493	0.00423658	0.0443353	0.0353558	8626/5915/6256/4221/4760/429/222546/137964/5991/5080/9575/28514/1021/654/5914/2931	16
GO:0007528	neuromuscular junction development	16/3204	47/18493	0.00423658	0.0443353	0.0353558	10243/6495/288/4734/9254/7402/2119/51804/782/785/8997/22941/23025/85358/10497/4038	16
GO:0071453	cellular response to oxygen levels	47/3204	187/18493	0.00430378	0.0449633	0.0358566	3516/8453/6095/3091/2033/10059/10370/10891/5581/23411/10135/9550/5163/4194/64506/867/1906/55662/355/596/9978/2475/2309/6921/3658/29904/1789/6781/6547/54583/4193/114990/664/7225/5562/5728/1869/112399/3751/677/84962/1902/3777/147007/5467/947/665	47
GO:0034764	positive regulation of transmembrane transport	48/3204	192/18493	0.00440315	0.0458496	0.0365634	1756/288/3747/154/481/483/114882/3799/57214/3064/27347/8660/2745/375346/9472/3759/3746/57620/23204/5781/81/825/196527/2719/1520/1432/6506/5174/9847/5027/10142/3736/3667/388591/7225/5311/5741/6262/219527/6373/51582/4205/3784/25999/85358/5649/2539/6271	48
GO:0046330	positive regulation of JNK cascade	37/3204	140/18493	0.00441775	0.0458496	0.0365634	2185/8312/7786/10371/9043/22943/9839/6188/10125/1236/1906/8322/2074/56940/8325/7855/9175/114609/8324/2043/389432/6885/142679/10746/23236/55504/4293/4217/8600/23328/10333/84451/6416/9770/50488/4296/1856	37
GO:0031958	corticosteroid receptor signaling pathway	8/3204	17/18493	0.00443257	0.0458496	0.0365634	2908/23054/4734/8289/1408/9575/7533/5536	8
GO:0032354	response to follicle-stimulating hormone	8/3204	17/18493	0.00443257	0.0458496	0.0365634	2729/5069/10891/3157/7049/6716/2693/2046	8
GO:0062033	positive regulation of mitotic sister chromatid segregation	8/3204	17/18493	0.00443257	0.0458496	0.0365634	8452/25836/3192/9700/55719/51529/5925/8678	8
GO:0070828	heterochromatin organization	8/3204	17/18493	0.00443257	0.0458496	0.0365634	3159/8091/7175/80854/51548/22893/3021/6615	8
GO:0032878	regulation of establishment or maintenance of cell polarity	10/3204	24/18493	0.0044417	0.0458682	0.0365782	2185/5908/889/22902/57698/3996/9750/51057/2625/23189	10
GO:0051899	membrane depolarization	26/3204	90/18493	0.00449343	0.0462839	0.0369098	23327/288/2729/6330/1634/6334/11280/1906/596/3759/6326/8913/777/6324/776/1141/5027/5774/785/477/775/7533/6328/6323/142/6327	26
GO:0002573	myeloid leukocyte differentiation	49/3204	197/18493	0.00449675	0.0462839	0.0369098	4208/3516/4286/6886/10401/27086/2778/23411/1236/10234/9846/4067/1385/2475/5771/84522/3662/3658/169200/27102/55294/2719/10859/3815/1432/7030/56998/135228/7048/130733/1021/814/841/9644/5925/142/8600/84293/84959/677/7097/7037/2625/2101/9770/2194/133522/5914/84456	49
GO:0044783	G1 DNA damage checkpoint	20/3204	64/18493	0.00458125	0.0469991	0.0374801	29883/1874/2033/6659/246175/9337/6118/1026/4194/4193/1027/7029/79791/85456/1017/4850/1869/835/25946/9125	20
GO:0045600	positive regulation of fat cell differentiation	20/3204	64/18493	0.00458125	0.0469991	0.0374801	3192/4041/60485/83643/1385/169200/2487/115825/168455/1432/7166/3356/688/6789/7494/1240/55252/677/5467/25946	20
GO:0040013	negative regulation of locomotion	87/3204	386/18493	0.0047814	0.0489688	0.0390508	4208/9901/25932/9314/23613/10371/90627/4286/58516/9353/889/4856/1602/23143/10370/94241/10891/89795/7057/186/4070/11171/10512/6347/114882/1634/84978/130399/10505/1281/56254/54910/23122/8646/56940/6405/596/51765/55435/5771/2309/29/4204/11240/26585/375056/104/6781/2066/8428/57826/23380/285/9750/57556/613/57522/5054/9863/5793/27202/93649/1398/54328/6387/5911/11057/8482/6774/9231/23236/10509/4163/5728…	87
GO:0030048	actin filament-based movement	36/3204	136/18493	0.00480191	0.0489688	0.0390508	1756/23327/5144/2697/10052/70/6330/3759/8913/81/5350/80179/54874/1824/6781/6324/4647/776/57698/4646/7170/4644/7111/57669/388591/477/775/3781/122786/6323/6262/6327/8976/79784/3784/10630	36
GO:0030166	proteoglycan biosynthetic process	19/3204	60/18493	0.00480454	0.0489688	0.0390508	26035/90161/6934/23169/1463/10090/222537/1634/8509/54360/9953/2135/266722/9394/1462/92370/55790/2137/50515	19
GO:0032835	glomerulus development	19/3204	60/18493	0.00480454	0.0489688	0.0390508	4208/4811/55366/186/284/6943/596/2028/51196/285/80310/9863/4358/5156/1285/5420/947/55959/2296	19
GO:0048469	cell maturation	43/3204	169/18493	0.00484512	0.049302	0.0393166	163589/2185/5241/1028/6886/3091/3600/53335/860/51341/30812/429/10882/1026/137964/596/9991/26468/865/5991/64100/2475/7855/2309/4204/4929/9175/51441/59277/558/7494/11057/5925/29842/4897/577/2625/2539/5139/84456/1203/2046/4880	43
GO:0007179	transforming growth factor beta receptor signaling pathway	48/3204	193/18493	0.00489648	0.0497438	0.0396689	10979/4221/1028/4093/4053/5494/2033/1601/10370/6498/7057/23411/57154/11171/6497/51701/51341/1278/867/130399/7049/7046/1281/56940/1385/5654/92/4088/135228/7048/114990/91/4090/5829/9372/4087/6868/9110/93649/6885/90/142/65997/10454/8754/5747/23089/50515	48
GO:0010631	epithelial cell migration	79/3204	346/18493	0.00492354	0.0499247	0.0398131	4208/2185/9314/3673/6776/10371/90627/154796/6667/9353/3091/889/27086/4856/7101/9839/154810/5581/7057/186/23411/116150/284/8817/4070/11171/10982/5586/2252/10000/1634/9448/7046/1906/3690/23122/23129/2475/6239/25960/1803/4204/4215/5781/5286/26585/375056/55294/5587/6781/3815/6678/7048/5829/285/57669/23616/5613/6868/2246/5793/57142/340719/2196/8828/64094/4163/5728/3037/23328/8754/51057/2625/91862/5747…	79
GO:0001844	protein insertion into mitochondrial membrane involved in apoptotic signaling pathway	11/3204	28/18493	0.00494761	0.0499247	0.0398131	8626/7529/27113/5599/596/10971/7029/7533/841/1869/7161	11
GO:0071695	anatomical structure maturation	40/3204	155/18493	0.00495916	0.0499247	0.0398131	2185/3516/5241/1028/6886/3091/53335/51341/10882/1026/137964/596/9991/5991/2261/2475/2309/4204/26585/64434/196527/4929/9175/4644/51441/59277/7494/5741/5925/29842/4897/577/2625/8642/2539/5139/84456/1203/2046/4880	40
GO:0015849	organic acid transport	73/3204	316/18493	0.00496087	0.0499247	0.0398131	54407/2170/6256/8604/7504/117247/23169/159963/7057/186/256987/23657/6533/115111/27347/8529/7069/8884/1906/8660/6529/83733/50487/9120/81539/6579/2182/253512/5205/6512/552/6578/23204/22930/81579/8648/6506/6198/22925/9152/23428/5027/151258/6509/376497/10550/55117/5825/477/28232/6857/54677/1374/6566/6507/5322/56923/2917/57030/8600/3766/10499/6534/1813/55238/10630/5467/6535/1468/113235/6567/388662/6542	73
GO:0046942	carboxylic acid transport	73/3204	316/18493	0.00496087	0.0499247	0.0398131	54407/2170/6256/8604/7504/117247/23169/159963/7057/186/256987/23657/6533/115111/27347/8529/7069/8884/1906/8660/6529/83733/50487/9120/81539/6579/2182/253512/5205/6512/552/6578/23204/22930/81579/8648/6506/6198/22925/9152/23428/5027/151258/6509/376497/10550/55117/5825/477/28232/6857/54677/1374/6566/6507/5322/56923/2917/57030/8600/3766/10499/6534/1813/55238/10630/5467/6535/1468/113235/6567/388662/6542	73
GO:0043434	response to peptide hormone	93/3204	417/18493	0.00496215	0.0499247	0.0398131	2170/5908/4221/2770/10890/6776/2729/6667/185/55777/526/2887/186/23411/6429/51762/694/9550/6599/112/114882/55023/4040/64506/130399/7049/3480/1906/8660/8651/4067/2641/1385/255738/2475/5771/2309/2534/252983/113/5781/5286/29904/5350/8850/9365/6431/6678/8473/4193/6198/6716/9847/4929/1176/5829/4644/1979/3667/64397/376497/5573/1398/54328/6387/7494/2549/6774/8835/4218/5728/30837/528/143686/142/5140/6654/…	93

## Sheet: S3. miRTarBase GO function
ID	Description	GeneRatio	BgRatio	pvalue	p.adjust	qvalue	geneID	Count
GO:0006402	mRNA catabolic process	107/2431	307/18493	1.05976e-22	6.48465e-19	4.55472e-19	131405/1994/114609/472/2475/5580/7311/6133/8761/10642/23019/7534/8570/3312/6138/8241/3192/7316/26135/3921/6168/6188/8125/25904/4904/6209/9349/6122/6218/6137/7314/6206/3304/25873/6130/23369/56829/80153/7431/23049/3183/4670/9261/23367/6144/6159/6129/51441/167153/4116/10236/6187/131870/9967/6125/26523/10949/1797/6160/1981/9939/10921/4343/328/6202/6173/6232/6143/4736/6154/6418/9567/6176/8531/6210/613…	107
GO:0006401	RNA catabolic process	111/2431	340/18493	6.30412e-21	1.92875e-17	1.35472e-17	131405/1994/114609/472/2475/5580/7311/6133/8761/10642/23019/7534/8570/3312/6138/8241/3192/7316/26135/3921/6168/6188/8125/25904/4904/6209/9349/6122/6218/6137/7314/6206/3304/25873/6130/23369/56829/80153/7431/23049/3183/4670/9261/23367/6144/6159/6129/51441/167153/4116/10236/6187/131870/9967/6125/26523/79002/10949/1797/6160/1981/9939/10921/92345/4343/328/6202/6173/6232/6143/4736/6154/6418/9567/6176/3…	111
GO:0045787	positive regulation of cell cycle	116/2431	390/18493	3.11865e-18	6.36101e-15	4.46788e-15	993/4582/1026/29766/8091/1977/1019/472/3481/1490/4193/9928/9700/23019/8317/6840/4303/3192/2033/896/5111/25904/9349/8563/1647/5914/1874/3326/9401/8451/7175/1778/6421/23636/899/546/5886/990/9555/894/1663/131870/54623/9510/55920/11065/1981/3054/5514/440/10869/900/328/151195/51529/6154/79577/8678/137886/6210/5925/5048/5889/4849/26057/9133/3586/6714/22924/6659/4194/7474/1906/7027/835/6198/940/3297/214…	116
GO:1903311	regulation of mRNA metabolic process	87/2431	264/18493	5.79488e-17	8.86472e-14	6.22645e-14	131405/1994/114609/10521/2475/5580/7311/25962/8761/10642/3191/23019/10898/7534/8570/3312/5725/26528/8241/3192/7316/26135/8125/4904/7314/57703/6625/23369/56829/7431/6830/3183/4670/3178/10657/9261/23367/51441/4116/10236/54623/11338/3190/9967/3181/10949/1981/9939/10921/29890/8106/51759/4343/91746/328/6418/9567/79577/8531/6294/11051/22938/10262/1660/207/8741/54855/4154/201626/22916/6434/3297/6432/623…	87
GO:0090068	positive regulation of cell cycle process	89/2431	286/18493	1.35734e-15	1.66112e-12	1.16674e-12	993/4582/1026/29766/8091/1019/472/3481/1490/4193/9928/9700/23019/8317/6840/4303/3192/2033/896/5111/25904/9349/1647/1874/9401/8451/7175/1778/6421/23636/546/990/9555/894/1663/131870/54623/9510/55920/11065/1981/10869/328/51529/6154/79577/8678/137886/5925/5889/4849/26057/6659/4194/7474/1906/7027/835/940/2146/1820/23378/4850/7320/246175/1027/595/5155/153241/84440/9493/5962/8452/11200/5586/4204/2627/29…	89
GO:0000082	G1/S transition of mitotic cell cycle	81/2431	263/18493	4.86491e-14	4.57922e-11	3.21637e-11	9314/993/4582/1026/5530/131405/4609/596/1977/1019/472/5728/10217/4193/9928/79960/23019/8317/2033/896/5111/25904/997/6117/4171/4176/55388/6119/1647/10106/1874/8451/1029/1021/990/894/9510/7298/1981/328/8453/4999/6241/8454/6154/79577/5001/8065/5925/55159/4849/91/26057/571/6659/4194/3400/7027/835/6198/2146/1820/4850/246175/1027/595/138151/5962/815/8452/11200/4173/1876/1654/6790/23649/5000/5558/54107/…	81
GO:0006413	translational initiation	66/2431	194/18493	6.07761e-14	4.57922e-11	3.21637e-11	1977/2475/7311/6133/84919/8663/6138/8891/3921/6168/6188/6209/9349/6122/8662/6218/6137/6206/25873/6130/8562/10657/7175/23367/10480/6144/6159/6129/51441/8664/6187/1973/6125/6160/1981/6202/6173/6232/6143/4736/6154/6176/6210/6134/9045/6192/6142/8661/3692/6207/6229/22927/22916/6198/83939/57002/6233/5433/1982/7458/27161/1654/6171/54915/23521/1978	66
GO:0034248	regulation of cellular amide metabolic process	118/2431	453/18493	7.22159e-14	4.57922e-11	3.21637e-11	131405/1994/80315/1977/1019/2475/5580/10642/3191/23019/84919/9221/1938/8570/5036/8663/92715/6188/25904/23400/8550/8662/2597/1802/16/5914/6625/23369/26065/7431/4691/2309/10657/7175/23367/1915/51441/8664/51204/10131/3609/6472/4116/10236/6125/6949/92170/26523/5621/7298/3658/1981/9939/5223/4343/55239/9444/51091/6154/94101/1984/143244/8531/6134/3692/4849/2931/1660/207/84541/6659/22927/142891/57546/229…	118
GO:0071900	regulation of protein serine/threonine kinase activity	126/2431	496/18493	7.37791e-14	4.57922e-11	3.21637e-11	5347/993/1026/7046/1956/4215/3480/7422/5728/2321/3481/3611/11140/5608/2873/5580/7311/7316/896/2889/6188/8550/7314/9693/1857/1647/3326/1029/51495/9261/3156/23636/899/65125/7405/990/9555/894/4916/7074/28956/56034/9500/10746/3265/6850/900/151195/9802/2965/60/51562/1849/10527/23411/9133/64853/8325/673/207/6416/80310/5871/4296/8491/6714/801/22924/6789/7474/57551/2149/1906/56647/805/389432/28951/2146/1…	126
GO:0007050	cell cycle arrest	76/2431	241/18493	7.4836e-14	4.57922e-11	3.21637e-11	6657/4582/1026/7046/8091/4609/1019/472/3611/4193/2475/5608/23019/5036/4303/2033/5111/25904/9349/5565/1647/1874/3326/8451/1029/1021/10657/11180/5621/28956/5310/3265/90480/8453/8454/6154/8065/5925/4849/55004/4853/4088/6659/58528/26959/4194/6498/7027/835/1820/23378/4850/1982/246175/1027/595/7251/7057/2619/5562/8326/8452/1843/11200/7023/6934/2627/6790/5571/64121/153129/1718/3576/7042/4760/22846	76
GO:0016569	covalent chromatin modification	120/2431	470/18493	2.01413e-13	1.12041e-10	7.86958e-11	4582/8091/472/7422/3481/3066/79960/5580/9329/54880/1108/3065/2033/3070/10933/2648/8085/11091/29128/5536/6830/6421/79813/51564/57602/64324/58508/546/63976/10847/4000/9555/56970/54623/2145/9320/10664/26155/7874/9219/7468/26993/201163/4152/26038/3054/10919/3720/23030/57634/6839/9031/9643/79685/1786/6418/79577/1387/51562/2140/80349/23411/22938/27097/1105/10336/10075/84444/6877/8295/4089/51742/56916/6…	120
GO:0033044	regulation of chromosome organization	93/2431	330/18493	2.5241e-13	1.21514e-10	8.53497e-11	5347/4582/4609/472/7422/3481/9700/26354/54880/6950/3192/142/4171/8550/10694/84861/9184/2648/6830/23049/3183/3178/7175/6421/51750/64324/546/990/4000/10574/9555/1663/54623/9320/10664/26155/80169/3181/7874/26993/201163/5514/3720/92345/3005/4288/3020/55781/7520/51529/56984/1786/6418/54386/64682/8678/5925/80349/23411/22938/4089/6714/6879/3159/26097/6720/9869/5927/7320/144108/5609/9874/5599/5594/3021/6…	93
GO:0006613	cotranslational protein targeting to membrane	45/2431	109/18493	2.5816e-13	1.21514e-10	8.53497e-11	6727/7311/6133/6747/6138/3921/6168/6188/6209/9349/6122/6218/6137/6206/25873/6130/6144/6159/6129/6187/6125/6746/29927/6160/6202/6173/6232/6143/4736/6154/6176/6210/6134/9045/6192/6142/6207/23204/6229/6233/6734/6171/6745/23521/23471	45
GO:0000956	nuclear-transcribed mRNA catabolic process	67/2431	207/18493	5.73913e-13	2.50841e-10	1.76187e-10	472/7311/6133/23019/6138/3921/6168/6188/25904/6209/9349/6122/6218/6137/6206/25873/6130/80153/23049/6144/6159/6129/167153/4116/6187/9967/6125/26523/1797/6160/1981/9939/10921/6202/6173/6232/6143/4736/6154/6176/6210/6134/9045/6192/6142/4849/80349/6207/6229/201626/1656/22916/5520/4850/6233/5433/246175/5515/27161/677/7812/678/85441/6171/10767/9775/23521	67
GO:0016570	histone modification	116/2431	456/18493	6.66288e-13	2.71801e-10	1.90909e-10	4582/8091/472/7422/3481/3066/79960/5580/9329/54880/1108/3065/2033/10933/2648/8085/11091/29128/5536/6830/6421/79813/51564/57602/64324/58508/546/63976/10847/4000/9555/56970/54623/2145/9320/10664/26155/7874/9219/7468/26993/201163/26038/3054/10919/3720/23030/57634/6839/9031/9643/79685/1786/6418/79577/1387/51562/2140/80349/23411/22938/27097/10336/10075/84444/6877/8295/4089/51742/56916/6879/8202/51322/…	116
GO:0000184	nuclear-transcribed mRNA catabolic process nonsense-mediated decay	47/2431	120/18493	7.75792e-13	2.96692e-10	2.08392e-10	7311/6133/6138/3921/6168/6188/6209/9349/6122/6218/6137/6206/25873/6130/23049/6144/6159/6129/4116/6187/6125/6160/1981/9939/10921/6202/6173/6232/6143/4736/6154/6176/6210/6134/9045/6192/6142/6207/6229/22916/5520/6233/5515/85441/6171/9775/23521	47
GO:0044843	cell cycle G1/S phase transition	82/2431	282/18493	1.0769e-12	3.87621e-10	2.7226e-10	9314/993/4582/1026/5530/131405/4609/596/1977/1019/472/5728/10217/4193/9928/79960/23019/8317/2033/896/5111/25904/997/6117/4171/4176/55388/6119/1647/10106/1874/8451/1029/1021/990/894/54623/9510/7298/1981/328/8453/4999/6241/8454/6154/79577/5001/8065/5925/55159/4849/91/26057/571/6659/4194/3400/7027/835/6198/2146/1820/4850/246175/1027/595/138151/5962/815/8452/11200/4173/1876/1654/6790/23649/5000/5558/…	82
GO:0097193	intrinsic apoptotic signaling pathway	82/2431	287/18493	2.9855e-12	1.0149e-09	7.12853e-10	664/4582/3091/1026/596/598/472/4193/10550/5580/2956/2023/3065/2033/6188/10955/142/9709/7314/57805/7917/7178/10059/84334/8451/57646/6421/9529/10131/84447/5034/10105/3190/28996/26155/4841/204851/9774/10525/54541/26471/4170/3265/54431/8453/29979/8454/6154/8531/8065/23411/22938/960/207/6714/10625/5366/6498/79073/5326/835/1051/8795/7494/23378/259230/138151/56616/6648/8452/11200/1654/29108/51060/5163/5…	82
GO:0051169	nuclear transport	96/2431	360/18493	3.68824e-12	1.18781e-09	8.34299e-10	5530/1959/1977/4193/4321/5580/10898/9221/10482/5036/3921/8125/60468/6209/9349/23144/3837/30000/2316/8563/3326/54890/6830/3728/23049/3178/10657/7175/9670/23636/23633/4116/10189/4000/11338/54535/10762/2010/5901/3181/26993/9939/5310/10921/5514/55339/51715/29890/8106/6632/6633/6850/7531/3838/91746/55781/51496/1984/3692/8720/10527/23411/9818/10073/1660/207/4088/57506/3159/56647/26097/22916/9295/6432/2…	96
GO:0072599	establishment of protein localization to endoplasmic reticulum	46/2431	121/18493	4.70446e-12	1.43933e-09	1.01096e-09	6727/7311/6133/6747/6138/3921/6168/6188/6209/9349/6122/6218/6137/6206/25873/60559/6130/6144/6159/6129/6187/6125/29927/6160/6202/6173/6232/54557/6143/4736/6154/6176/6210/6134/9045/6262/10890/6192/6142/6207/6229/6233/6734/6171/23521/23471	46
GO:0006913	nucleocytoplasmic transport	95/2431	357/18493	5.44514e-12	1.55861e-09	1.09475e-09	5530/1959/1977/4193/4321/5580/10898/9221/10482/5036/3921/8125/60468/6209/9349/23144/3837/30000/2316/8563/3326/54890/6830/3728/23049/3178/10657/7175/9670/23636/23633/4116/10189/4000/11338/54535/10762/2010/5901/3181/26993/9939/5310/10921/5514/55339/51715/29890/8106/6632/6633/6850/7531/3838/91746/55781/51496/1984/3692/8720/10527/23411/9818/10073/1660/207/4088/57506/56647/26097/22916/9295/6432/23165/…	95
GO:0006614	SRP-dependent cotranslational protein targeting to membrane	42/2431	105/18493	5.60378e-12	1.55861e-09	1.09475e-09	6727/7311/6133/6747/6138/3921/6168/6188/6209/9349/6122/6218/6137/6206/25873/6130/6144/6159/6129/6187/6125/29927/6160/6202/6173/6232/6143/4736/6154/6176/6210/6134/9045/6192/6142/6207/6229/6233/6734/6171/23521/23471	42
GO:0043487	regulation of RNA stability	47/2431	126/18493	6.11488e-12	1.62682e-09	1.14266e-09	131405/1994/114609/2475/5580/7311/8761/10642/7534/8570/3312/8241/3192/7316/26135/8125/4904/7314/23369/7431/3183/4670/9261/23367/51441/167153/10236/9967/10949/1797/1981/92345/4343/328/6418/8531/1660/207/8741/54855/201626/6233/246175/677/10643/55147/678	47
GO:0051236	establishment of RNA localization	63/2431	198/18493	6.51283e-12	1.6605e-09	1.16631e-09	1977/472/10642/10898/10482/8570/5036/3192/3921/6209/23144/55308/23299/8563/8888/54890/6830/23049/3178/10657/7175/6421/23636/4116/10189/11338/10762/5901/3181/26993/9939/10921/55339/29890/8106/91746/55781/9444/1984/143244/3692/9818/10073/1660/7048/56647/26097/22916/3297/9295/6432/23165/5433/6427/9631/9688/677/10643/348995/9775/6311/11097/23237	63
GO:0051052	regulation of DNA metabolic process	105/2431	412/18493	7.42297e-12	1.81685e-09	1.27613e-09	9314/8091/1956/4609/1676/472/659/5580/26354/6950/2956/8317/3192/5111/6188/142/8550/10694/409/3326/9401/8451/6830/8914/23049/3183/3178/5531/8243/30968/51750/546/990/10189/10574/9126/1663/131870/9320/23244/80169/3181/7874/7468/4968/10919/5514/3265/92345/3005/64110/3838/7398/80311/7520/1786/54386/23347/3146/2140/23411/26057/1660/207/6416/8741/3586/6714/56916/5930/7027/940/7270/9869/3297/7644/26585/7…	105
GO:0050657	nucleic acid transport	62/2431	195/18493	9.89858e-12	2.24331e-09	1.57567e-09	1977/10642/10898/10482/8570/5036/3192/3921/6209/23144/55308/23299/8563/8888/54890/6830/23049/3178/10657/7175/6421/23636/4116/10189/11338/10762/5901/3181/26993/9939/10921/55339/29890/8106/91746/55781/9444/1984/143244/3692/9818/10073/1660/7048/56647/26097/22916/3297/9295/6432/23165/5433/6427/9631/9688/677/10643/348995/9775/6311/11097/23237	62
GO:0050658	RNA transport	62/2431	195/18493	9.89858e-12	2.24331e-09	1.57567e-09	1977/10642/10898/10482/8570/5036/3192/3921/6209/23144/55308/23299/8563/8888/54890/6830/23049/3178/10657/7175/6421/23636/4116/10189/11338/10762/5901/3181/26993/9939/10921/55339/29890/8106/91746/55781/9444/1984/143244/3692/9818/10073/1660/7048/56647/26097/22916/3297/9295/6432/23165/5433/6427/9631/9688/677/10643/348995/9775/6311/11097/23237	62
GO:0051098	regulation of binding	96/2431	369/18493	1.70134e-11	3.65081e-09	2.56428e-09	9314/5347/5530/7046/8091/3397/596/114609/3066/5580/1522/3191/8663/2033/142/9709/9693/5914/409/8721/3326/26086/23383/5195/8664/64324/64400/4043/1663/7074/5901/28996/1981/5310/2801/3005/26119/129531/6281/60/3146/5925/84444/4208/64853/1660/207/6664/4088/4089/3586/6714/22924/22927/6789/7474/5465/3400/805/6093/3297/1398/27185/23129/2011/1452/65981/5155/7341/8932/5599/5515/7049/2043/7023/6934/9421/6790…	96
GO:0006403	RNA localization	69/2431	231/18493	1.73962e-11	3.65081e-09	2.56428e-09	1977/472/10642/10898/10482/6950/8570/5036/3192/3921/6209/23144/10694/55308/23299/8563/8888/54890/6830/23049/3178/10657/7175/6421/23636/4116/10189/10574/11338/10762/7528/5901/3181/26993/9939/10921/55339/29890/8106/92345/91746/55781/9444/1984/143244/3692/9818/10073/1660/7048/56647/26097/22916/3297/9295/6432/23165/9326/5433/6427/9631/9688/677/10643/348995/9775/6311/11097/23237	69
GO:0006338	chromatin remodeling	55/2431	165/18493	1.84905e-11	3.65081e-09	2.56428e-09	8091/4609/2099/3066/2186/554313/6597/6944/55636/5757/1108/3065/3070/2648/57680/8366/6830/1029/3183/7175/546/10847/6601/121504/6595/9219/26038/9031/11335/3020/60/23347/8364/3146/5925/6602/57459/1105/6599/6662/8467/56916/55166/3159/144108/3149/8932/3021/9757/11339/23314/23135/51341/54107/79172	55
GO:0090150	establishment of protein localization to membrane	86/2431	317/18493	1.84957e-11	3.65081e-09	2.56428e-09	1956/596/6727/7311/6133/6747/7534/6138/3308/3921/6168/6188/6209/9349/6122/6218/6137/6206/25873/7917/6130/9141/55625/4836/6144/6159/6129/6187/6125/6711/6746/5621/23499/29927/6160/3265/7531/6202/4905/6173/2181/6232/54557/6143/4736/6154/6176/6210/6134/9045/10890/6192/6142/6207/23204/83871/6229/673/801/5366/7533/7027/2040/25945/7532/6233/54471/63971/253832/5599/23463/56947/6734/3745/6171/2803/117177/…	86
GO:0006417	regulation of translation	102/2431	402/18493	1.96059e-11	3.74902e-09	2.63326e-09	131405/1994/80315/1977/1019/2475/10642/3191/23019/84919/9221/1938/8570/5036/8663/92715/6188/25904/8550/8662/2597/1802/16/5914/23369/26065/7431/4691/2309/10657/7175/23367/51441/8664/51204/10131/3609/6472/4116/10236/6125/6949/92170/26523/7298/3658/1981/9939/4343/55239/9444/51091/6154/1984/143244/8531/6134/3692/4849/1660/207/84541/6659/22927/22916/3569/6198/940/83939/83667/5433/1982/246175/65981/647…	102
GO:0002009	morphogenesis of an epithelium	116/2431	479/18493	2.08458e-11	3.75444e-09	2.63706e-09	9314/3091/6772/131405/1956/4609/596/8324/7422/5728/2099/182/3611/6868/2475/4321/4323/5420/1522/6768/1482/2316/23654/1857/2045/2648/9948/5914/409/7798/8854/8914/10959/25902/4478/1954/9723/1213/341640/9620/1741/121643/30812/7074/163/5361/9500/5310/81839/57662/4649/10672/27086/8915/2885/10522/9968/1282/5048/6262/10890/4208/6239/1289/960/6662/6664/4088/7048/4089/3586/6714/25932/6659/6789/64398/7474/8…	116
GO:0045047	protein targeting to ER	44/2431	117/18493	2.08614e-11	3.75444e-09	2.63706e-09	6727/7311/6133/6747/6138/3921/6168/6188/6209/9349/6122/6218/6137/6206/25873/60559/6130/6144/6159/6129/6187/6125/29927/6160/6202/6173/6232/54557/6143/4736/6154/6176/6210/6134/9045/6192/6142/6207/6229/6233/6734/6171/23521/23471	44
GO:0043488	regulation of mRNA stability	44/2431	118/18493	2.90691e-11	5.08211e-09	3.5696e-09	131405/1994/114609/2475/5580/7311/8761/10642/7534/8570/3312/8241/3192/7316/26135/8125/4904/7314/23369/7431/3183/4670/9261/23367/51441/10236/9967/10949/1981/4343/328/6418/8531/1660/207/8741/54855/201626/6233/246175/677/10643/55147/678	44
GO:0070972	protein localization to endoplasmic reticulum	50/2431	146/18493	5.01274e-11	8.52026e-09	5.9845e-09	6727/7311/6133/6747/6138/3921/6168/6188/6209/9349/6122/6218/6137/6206/25873/60559/6130/6144/6159/6129/6187/6125/29927/6160/9919/10945/6202/6173/6232/54557/3638/6143/4736/6154/6176/11014/6210/6134/9045/6262/10890/6192/6142/6207/6229/6233/6734/6171/23521/23471	50
GO:0072331	signal transduction by p53 class mediator	65/2431	218/18493	7.2653e-11	1.20152e-08	8.43932e-09	4582/4646/1026/596/8493/472/4193/23019/2033/5111/25904/9349/8550/7314/1457/1647/7917/1874/57646/2309/11198/6908/8148/4839/546/6878/3190/6125/28996/26155/26038/204851/54541/26471/6154/4849/23411/22938/6877/960/207/5366/6659/4194/6879/79073/7027/835/1820/23378/4850/83667/246175/1027/84154/11200/7023/6790/29108/161742/7291/8444/6591/23368/64769	65
GO:0043161	proteasome-mediated ubiquitin-dependent protein catabolic process	98/2431	389/18493	7.49433e-11	1.20678e-08	8.47628e-09	5347/131405/122809/4193/9928/57542/130507/7311/83590/7316/4130/997/9709/7314/3304/57805/84861/9184/7917/409/79654/10613/3326/8451/5708/5094/9529/899/25897/5714/51035/5886/84447/54620/91445/11060/7874/7327/5695/11065/144699/54431/10869/4092/79176/5683/9695/80311/7415/54557/51529/5686/29979/8454/64682/137886/23411/2931/25852/5690/6599/207/387921/165324/4189/26224/64795/51322/28951/9616/10277/10206/…	98
GO:0071559	response to transforming growth factor beta	71/2431	249/18493	9.41845e-11	1.47773e-08	1.03794e-08	7525/7046/3397/659/6868/3066/50848/9372/7311/5796/2033/7316/142/7314/409/3326/9141/5045/2201/63976/1785/8516/28996/201163/1284/4092/1387/867/23411/22938/91/4208/5747/6662/6664/4088/4090/7048/4089/80310/6714/1385/9480/7474/6498/1906/6093/4091/1398/6233/7057/1399/10637/677/7049/678/10370/864/23089/3675/26036/7071/51341/93649/6935/5829/7042/4087/9475/10979/2908	71
GO:1901990	regulation of mitotic cell cycle phase transition	95/2431	375/18493	1.05698e-10	1.61692e-08	1.1357e-08	9314/5347/993/4582/1026/29766/8091/596/1019/472/5728/10217/4193/9928/79960/22995/9700/23019/2956/8317/4303/2033/896/5111/25904/63967/9587/84861/9184/1647/27183/10106/1874/9401/8451/7175/5116/1778/203068/990/894/11190/80169/9510/55920/11065/1981/7846/7531/328/54820/55781/51529/56984/8454/6154/79577/5925/5048/5889/55159/4849/26057/6659/4194/57551/7027/835/2146/1820/4850/7532/246175/1027/595/9662/13…	95
GO:0016055	Wnt signaling pathway	111/2431	463/18493	1.08792e-10	1.62366e-08	1.14043e-08	6657/9314/865/5530/1956/8324/5728/2099/3611/1000/85458/57447/79960/83999/7088/7311/9679/6597/3065/7316/2889/7314/1482/1457/57805/1857/409/57680/23401/3728/2309/65125/1213/1500/9620/54623/2010/7074/26523/163/23499/7090/81839/10076/4343/83439/7415/8454/9968/79577/23189/6262/80349/2931/8325/6662/4088/6714/2308/801/10042/6659/26959/6789/331/7474/8323/154810/25987/4772/3487/26585/9037/27185/7320/6233/…	111
GO:0061013	regulation of mRNA catabolic process	48/2431	140/18493	1.15955e-10	1.68936e-08	1.18658e-08	131405/1994/114609/2475/5580/7311/8761/10642/23019/7534/8570/3312/8241/3192/7316/26135/8125/4904/7314/23369/56829/7431/3183/4670/9261/23367/51441/10236/9967/10949/1981/4343/328/6418/9567/8531/1660/207/8741/54855/201626/6233/246175/27161/677/10643/55147/678	48
GO:0048511	rhythmic process	76/2431	276/18493	1.28235e-10	1.82482e-08	1.28172e-08	1956/1959/3397/6092/1019/5054/5728/2099/3066/5608/3615/3191/3065/3192/2033/5111/1457/57805/409/2309/8914/6421/10236/5500/4916/9967/9510/7298/8204/9500/4841/9611/6839/11335/4704/1387/23411/1660/2113/6667/9956/6714/6095/1385/1408/26224/5465/3400/9975/835/1644/6720/2146/1390/5927/4915/2560/80045/196/5599/5562/4987/5187/9575/7008/7071/22871/7291/7042/836/1406/2069/5078/9475/5468/8242	76
GO:0198738	cell-cell signaling by wnt	111/2431	465/18493	1.43306e-10	1.99293e-08	1.39981e-08	6657/9314/865/5530/1956/8324/5728/2099/3611/1000/85458/57447/79960/83999/7088/7311/9679/6597/3065/7316/2889/7314/1482/1457/57805/1857/409/57680/23401/3728/2309/65125/1213/1500/9620/54623/2010/7074/26523/163/23499/7090/81839/10076/4343/83439/7415/8454/9968/79577/23189/6262/80349/2931/8325/6662/4088/6714/2308/801/10042/6659/26959/6789/331/7474/8323/154810/25987/4772/3487/26585/9037/27185/7320/6233/…	111
GO:0070482	response to oxygen levels	89/2431	349/18493	2.85071e-10	3.87633e-08	2.72268e-08	664/3091/1026/4609/596/80315/1019/472/7422/4352/5728/1490/4193/6868/3066/2475/4321/4323/7311/2023/2033/7316/7314/10059/54890/5428/2309/81/126374/5034/4000/360/28996/3658/5352/10525/54541/6839/10869/8453/23576/29979/8678/1387/6262/867/23411/3939/2034/2113/207/4088/7048/4089/5105/6714/6095/1385/2308/5366/571/4194/5465/1906/285/3297/9550/4891/6233/7057/114757/5562/677/7049/112399/4204/2627/10370/570…	89
GO:0071229	cellular response to acid chemical	61/2431	206/18493	3.76173e-10	5.00391e-08	3.51467e-08	9314/7525/1956/19/598/80315/8324/1019/472/7422/3066/2475/84861/5914/1291/8854/6472/4916/28956/56034/3658/7520/1786/1282/6602/22938/55004/207/6662/80310/5105/6714/1385/3949/58528/7474/1906/1051/7494/6720/5915/3297/729438/4915/83667/4067/6470/8651/5155/5562/10270/7584/6495/143686/64121/153129/6935/31/5468/53335/10413	61
GO:0071560	cellular response to transforming growth factor beta stimulus	68/2431	242/18493	4.66983e-10	6.07972e-08	4.27031e-08	7525/7046/3397/659/6868/3066/50848/9372/7311/5796/2033/7316/142/7314/409/3326/9141/5045/2201/63976/1785/8516/28996/201163/1284/4092/1387/867/23411/22938/91/4208/5747/6662/6664/4088/4090/7048/4089/80310/6714/1385/9480/7474/6498/1906/4091/1398/6233/7057/1399/10637/677/7049/678/10370/23089/3675/26036/7071/51341/93649/6935/5829/7042/4087/10979/2908	68
GO:0031331	positive regulation of cellular catabolic process	88/2431	347/18493	4.85657e-10	6.19112e-08	4.34855e-08	664/5347/3091/3667/131405/472/8660/5728/122809/4193/11140/5580/23019/8570/5049/9709/215/3304/7917/56829/26086/5045/23367/54543/51441/4478/79443/25897/10236/5886/7405/4898/1797/5261/201163/7430/93974/4343/64110/4092/9695/7415/29979/9567/10645/8678/3146/23411/2931/152503/5747/207/160418/2308/140775/3949/5465/51322/6093/28951/3297/10206/83667/255488/1452/246175/26234/7341/9655/5962/5562/27161/677/55…	88
GO:2001233	regulation of apoptotic signaling pathway	96/2431	391/18493	5.20667e-10	6.50196e-08	4.56688e-08	664/4582/3091/7046/596/598/3456/5054/5728/4193/5580/7534/1495/2023/3065/6188/10955/142/9709/7314/3304/1457/57805/409/7178/57448/10059/84334/9141/4836/6421/9529/10131/84447/5034/4000/10105/3190/26155/9500/4841/9774/10525/93974/4170/7531/8915/2395/29979/6154/8531/2140/23411/2931/960/207/4088/6714/10625/5366/7533/6789/6498/5062/7027/5326/835/6198/8795/7494/7532/259230/10116/7057/5599/138151/8326/664…	96
GO:0006405	RNA export from nucleus	46/2431	137/18493	6.1765e-10	7.5588e-08	5.30919e-08	1977/10898/10482/5036/3921/6209/23144/8563/54890/6830/23049/3178/10657/7175/23636/4116/10189/11338/10762/5901/3181/26993/9939/10921/55339/29890/8106/91746/55781/1984/3692/9818/1660/56647/26097/22916/9295/6432/23165/5433/6427/9631/9688/348995/9775/11097	46
GO:0051028	mRNA transport	49/2431	151/18493	6.55678e-10	7.86685e-08	5.52556e-08	1977/10642/10898/10482/8570/23144/55308/23299/8563/8888/54890/6830/23049/3178/7175/23636/4116/10189/11338/10762/3181/26993/9939/10921/55339/29890/8106/91746/9444/1984/143244/9818/1660/26097/22916/3297/9295/6432/23165/5433/6427/9631/9688/677/10643/348995/9775/11097/23237	49
GO:1903829	positive regulation of cellular protein localization	82/2431	318/18493	8.0599e-10	9.48433e-08	6.66166e-08	5347/1956/596/4193/58489/5580/26354/7534/6950/4130/142/56681/2316/10694/3326/9141/3728/4836/7175/5116/54543/4478/23636/57602/10574/2010/6711/11190/163/10055/5621/9919/7430/54434/3265/7531/9695/55781/2181/5780/51496/2931/10075/207/4088/2066/6714/5366/7533/55166/57506/7027/382/89781/2040/65267/7532/83667/54471/7251/64328/5599/5594/10541/5962/5562/51128/56947/55754/6934/10807/3745/151636/3675/79752/…	82
GO:0051054	positive regulation of DNA metabolic process	63/2431	220/18493	8.78511e-10	1.01427e-07	7.12405e-08	9314/1956/4609/472/5580/26354/6950/2956/8317/5111/6188/142/8550/10694/409/3326/9401/8914/3178/30968/51750/546/10574/1663/131870/80169/3181/7874/7468/5514/3265/92345/7520/1786/23347/3146/2140/23411/1660/207/6416/8741/6714/940/9869/3297/26585/7320/5609/5155/5594/1763/4204/57332/5982/151636/7037/58525/958/2069/3014/4931/54537	63
GO:0009896	positive regulation of catabolic process	98/2431	407/18493	1.05579e-09	1.16683e-07	8.19562e-08	664/5347/3091/3667/131405/472/8660/5728/122809/4193/11140/5580/23019/8570/5049/9709/215/3304/1457/7917/56829/26086/5045/23367/54543/51441/4478/79443/25897/10236/5886/7405/4898/11060/1797/5261/201163/7430/93974/23163/4343/64110/4092/4905/9695/7415/29979/9567/10645/8678/3146/23411/2931/152503/5747/207/6662/160418/2308/140775/3949/7474/5465/51322/6093/28951/3297/10206/83667/255488/1452/246175/1027/9…	98
GO:2001020	regulation of response to DNA damage stimulus	60/2431	206/18493	1.0682e-09	1.16683e-07	8.19562e-08	4582/8091/1956/4609/596/598/472/4193/5580/5111/6188/142/57805/8563/7178/8451/8914/23049/5531/51750/1663/131870/3190/9320/7468/4968/5514/9774/4170/64110/7398/80311/6154/54386/23347/3146/55159/2140/23411/1660/960/5366/6498/3297/55137/10116/138151/7913/11200/57332/151636/161742/7291/57007/8444/55031/3014/6591/54537/7335	60
GO:0000075	cell cycle checkpoint	62/2431	216/18493	1.07638e-09	1.16683e-07	8.19562e-08	5347/4582/1026/8091/598/472/4193/23019/2956/4303/2033/5111/25904/57805/63967/9587/84861/9184/8563/1647/27183/1874/8451/57646/8914/7175/990/5514/3265/9656/56984/6154/5925/55159/4849/84444/6664/64859/6659/4194/57551/51322/7027/835/988/1820/4850/10116/246175/1027/595/699/1763/9575/1843/11200/6790/55055/261726/25896/51514/3014	62
GO:0030522	intracellular receptor signaling pathway	76/2431	288/18493	1.08693e-09	1.16683e-07	8.19562e-08	865/2099/10521/5608/7105/7311/2288/23019/6597/3065/2033/7316/142/7314/3304/8085/5914/409/5536/23369/26065/2101/8854/81/8856/7376/9967/5901/8204/9611/27086/9968/5925/6294/23411/22938/26057/5292/9612/6714/6095/7533/6879/331/8202/1408/5465/9975/6720/5915/2146/1390/6233/2649/2274/196/23543/5187/9575/10370/7026/51389/7128/6397/7421/7067/51341/6774/7291/55666/131566/5468/6591/7335/2908/10413	76
GO:0010948	negative regulation of cell cycle process	79/2431	304/18493	1.11261e-09	1.17381e-07	8.24463e-08	9314/5347/4582/1026/8091/596/1019/472/5728/10217/4193/79960/9700/23019/2956/8317/4303/2033/5111/25904/9349/63967/84861/9184/4682/2648/1647/27183/10106/1874/3326/27243/7175/8243/79813/899/546/990/9126/9555/10919/5514/11335/56984/6241/8454/6154/79577/5925/55159/4849/6659/4194/57551/7027/835/2146/1820/4850/246175/1027/595/4591/138151/699/8326/5573/677/1843/11200/23468/678/7023/1876/6790/55031/51514/…	79
GO:0015931	nucleobase-containing compound transport	66/2431	237/18493	1.25913e-09	1.30587e-07	9.17225e-08	1977/10642/10898/10482/8570/5036/3192/3921/6209/23144/215/55308/23299/8563/8888/54890/6830/23049/3178/10657/7175/6421/23636/4116/10189/11338/10762/5901/3181/26993/9939/10921/55339/29890/8106/91746/55781/9444/1984/143244/3692/113829/9818/10073/1660/7048/56647/26097/22916/3297/9295/6432/23165/5433/3177/6427/9631/9688/677/10643/348995/51006/9775/6311/11097/23237	66
GO:0050684	regulation of mRNA processing	45/2431	137/18493	2.09458e-09	2.10921e-07	1.48148e-07	10521/25962/3191/10898/3312/5725/26528/8241/3192/57703/6625/6830/3178/10657/4116/54623/11338/3190/9967/3181/9939/10921/29890/8106/51759/91746/79577/6294/11051/22938/10262/1660/4154/22916/6434/3297/6432/23543/10658/6427/677/55796/6651/51341/9810	45
GO:1901987	regulation of cell cycle phase transition	98/2431	412/18493	2.10266e-09	2.10921e-07	1.48148e-07	9314/5347/993/4582/1026/29766/8091/596/1019/472/5728/10217/4193/9928/79960/22995/9700/23019/2956/8317/4303/2033/896/5111/25904/63967/9587/84861/9184/1647/27183/10106/1874/9401/8451/7175/5116/1778/203068/990/9555/894/54623/11190/80169/9510/55920/11065/1981/7846/7531/328/54820/55781/51529/56984/8454/6154/79577/5925/5048/5889/55159/4849/26057/6659/4194/57551/7027/835/2146/1820/4850/7532/246175/1027/…	98
GO:0034330	cell junction organization	75/2431	287/18493	2.23653e-09	2.20058e-07	1.54565e-07	865/7046/6624/596/7422/5728/3611/1000/50848/4323/5796/5818/1495/7082/2889/9693/2316/9948/87/8394/3728/81/51564/221935/1500/5339/2335/23499/667/5817/201163/55920/9748/204851/57662/4649/4092/6281/60/5747/4088/6714/64398/2149/382/29841/6093/5908/26585/25945/7414/9231/7070/7057/6801/5962/5586/54751/1004/8650/92140/57863/7042/79834/118/71/57555/7145/100506658/57493/9475/389/999/6591/10979	75
GO:0010498	proteasomal protein catabolic process	105/2431	452/18493	2.26567e-09	2.20058e-07	1.54565e-07	5347/131405/122809/4193/9928/57542/130507/7311/9491/83590/7316/4130/997/9709/7314/3304/57805/84861/9184/7917/409/79654/10613/3326/8451/5708/5094/9529/899/25897/5714/51035/5886/84447/54620/91445/11060/7874/7327/5695/11065/9306/144699/5310/56886/54431/10869/4092/79176/5683/9695/80311/7415/54557/51529/5686/29979/8454/64682/137886/23411/2931/25852/5690/6599/207/160418/387921/5366/165324/4189/26224/64…	105
GO:0042326	negative regulation of phosphorylation	104/2431	448/18493	2.80919e-09	2.68585e-07	1.8865e-07	9314/5347/1026/4609/3480/8660/5728/10217/3611/122809/2475/2764/57447/2873/5580/84919/3192/2889/1647/10106/409/5536/284996/1029/3156/5528/23636/140885/65125/9555/10105/4916/55243/5621/201163/1981/7430/9611/54541/54431/4092/54386/51562/5925/5048/867/8661/1849/10527/23411/64853/207/4089/2308/801/140775/90007/201626/6879/5465/5062/805/28951/4091/26585/1846/7453/7532/7320/55333/4298/4067/1027/103/7070…	104
GO:0071426	ribonucleoprotein complex export from nucleus	43/2431	129/18493	2.855e-09	2.68765e-07	1.88777e-07	1977/10898/10482/5036/3921/6209/23144/8563/54890/6830/23049/7175/23636/4116/10189/11338/10762/5901/3181/26993/9939/10921/55339/29890/8106/91746/55781/1984/3692/9818/56647/26097/22916/9295/6432/23165/5433/6427/9631/9688/348995/9775/11097	43
GO:0006352	DNA-templated transcription initiation	67/2431	248/18493	3.71199e-09	3.40541e-07	2.39191e-07	1026/865/8493/1019/2099/1490/554313/9329/7182/6597/5430/1482/5914/171568/2101/8366/2975/6908/112950/8148/8856/7376/4150/25885/6878/9967/121504/5431/9774/29959/2965/9968/1387/8364/3146/892/22938/6877/4853/6662/8467/6095/1385/6879/5465/1871/9975/5915/7343/7019/5433/2649/595/84172/2961/56998/26036/55729/7421/7067/7291/2962/5468/8061/2908/10413/5434	67
GO:0071166	ribonucleoprotein complex localization	43/2431	130/18493	3.72875e-09	3.40541e-07	2.39191e-07	1977/10898/10482/5036/3921/6209/23144/8563/54890/6830/23049/7175/23636/4116/10189/11338/10762/5901/3181/26993/9939/10921/55339/29890/8106/91746/55781/1984/3692/9818/56647/26097/22916/9295/6432/23165/5433/6427/9631/9688/348995/9775/11097	43
GO:0022604	regulation of cell morphogenesis	108/2431	474/18493	4.18977e-09	3.77018e-07	2.64812e-07	5530/3397/6092/7422/4352/5728/659/4739/3611/1000/11149/11151/1690/57611/9693/2316/23654/1857/2045/9948/10059/11135/1729/10084/226/3679/81/4478/1954/118813/126374/9723/1785/4916/347733/7074/2335/79784/23499/5361/8482/55920/7430/54434/10672/4289/6281/5048/23189/152503/5747/6239/960/673/6714/7533/7474/6498/1808/4131/171177/388/10562/1398/80823/51393/4915/9037/57464/91010/9423/23129/51199/2011/65981/…	108
GO:0061614	pri-miRNA transcription by RNA polymerase II	22/2431	44/18493	4.27114e-09	3.7877e-07	2.66042e-07	688/9314/3091/26354/6597/7528/2113/6662/4088/4089/3586/5465/4781/4091/5155/6774/7042/4775/8862/7015/5468/8061	22
GO:0008380	RNA splicing	106/2431	463/18493	4.43133e-09	3.83095e-07	2.6908e-07	1994/10521/25962/3191/10898/8570/3312/5725/26528/51645/8241/3192/4904/5430/10992/10594/10421/57805/9092/57703/8563/6625/23450/9416/6830/10291/10084/3183/4670/3178/10657/6421/5094/3185/10081/4116/10236/10946/10189/11325/11338/3190/9967/23451/3181/10523/10949/23076/26993/23524/4841/9939/10921/55339/5431/29890/8106/51759/6632/6633/2521/285672/91746/11017/9444/5093/23283/11051/22938/6207/10073/10262/…	106
GO:0006612	protein targeting to membrane	57/2431	198/18493	4.44512e-09	3.83095e-07	2.6908e-07	6727/7311/6133/6747/6138/3921/6168/6188/6209/9349/6122/6218/6137/6206/25873/6130/55625/6144/6159/6129/6187/6125/6746/5621/29927/6160/3265/6202/6173/6232/54557/6143/4736/6154/6176/6210/6134/9045/6192/6142/6207/23204/6229/2040/6233/54471/253832/23463/56947/6734/3745/6171/117177/27342/6745/23521/23471	57
GO:1904029	regulation of cyclin-dependent protein kinase activity	34/2431	91/18493	4.7269e-09	4.01721e-07	2.82163e-07	5347/993/1026/5728/11140/896/1647/3326/1029/899/990/894/900/151195/2965/60/10527/9133/6714/22924/56647/1163/1164/1027/595/5155/905/7023/7026/7128/93649/836/9088/1050	34
GO:0000079	regulation of cyclin-dependent protein serine/threonine kinase activity	33/2431	87/18493	5.09178e-09	4.26803e-07	2.9978e-07	5347/993/1026/5728/11140/896/1647/1029/899/990/894/900/151195/2965/60/10527/9133/6714/22924/56647/1163/1164/1027/595/5155/905/7023/7026/7128/93649/836/9088/1050	33
GO:0051168	nuclear export	56/2431	194/18493	5.43945e-09	4.49784e-07	3.15921e-07	1959/1977/4193/10898/10482/5036/3921/6209/23144/8563/54890/6830/23049/3178/10657/7175/23636/4116/10189/11338/54535/10762/2010/5901/3181/26993/9939/5310/10921/55339/29890/8106/7531/91746/55781/51496/1984/3692/9818/1660/56647/26097/22916/9295/6432/23165/5433/64328/6427/9631/10541/9688/6934/348995/9775/11097	56
GO:0001933	negative regulation of protein phosphorylation	96/2431	408/18493	5.54178e-09	4.51026e-07	3.16794e-07	9314/5347/1026/4609/3480/5728/10217/3611/122809/2475/2764/57447/2873/5580/84919/2889/1647/10106/409/5536/284996/1029/3156/5528/23636/140885/65125/9555/4916/55243/5621/201163/1981/7430/9611/54541/54431/4092/54386/51562/5925/5048/867/8661/1849/10527/23411/64853/207/4089/2308/801/140775/6879/5062/805/28951/4091/26585/1846/7453/7532/7320/55333/4298/4067/1027/103/7070/7251/8651/5515/116496/9655/1399/5…	96
GO:0036293	response to decreased oxygen levels	81/2431	325/18493	5.60189e-09	4.51026e-07	3.16794e-07	664/3091/4609/596/80315/472/7422/4352/5728/1490/4193/6868/2475/4321/4323/7311/2023/2033/7316/7314/10059/54890/2309/81/126374/5034/4000/360/28996/3658/5352/10525/54541/6839/10869/8453/23576/29979/8678/1387/6262/867/23411/3939/2034/2113/207/4088/7048/4089/5105/6714/6095/1385/5366/571/4194/5465/1906/285/3297/4891/6233/7057/114757/5562/677/7049/112399/4204/2627/10370/57085/7291/93649/5163/7042/836/30…	81
GO:1902275	regulation of chromatin organization	52/2431	175/18493	6.39752e-09	5.08395e-07	3.57089e-07	4582/472/7422/3481/54880/3192/2648/6830/7175/64324/546/4000/9555/54623/9320/10664/26155/26993/201163/3720/3005/4288/1786/6418/80349/23411/22938/4089/6879/3159/26097/6720/9869/5927/7320/144108/9874/5599/9757/10270/9252/4204/55124/26036/25836/7291/93649/9810/51043/23741/6591/8726	52
GO:0006611	protein export from nucleus	53/2431	180/18493	6.51902e-09	5.11408e-07	3.59206e-07	1959/1977/4193/10898/10482/5036/3921/6209/23144/8563/54890/6830/23049/7175/23636/4116/10189/11338/54535/10762/2010/5901/3181/26993/9939/5310/10921/55339/29890/8106/7531/91746/55781/51496/1984/3692/9818/56647/26097/22916/9295/6432/23165/5433/64328/6427/9631/10541/9688/6934/348995/9775/11097	53
GO:0001101	response to acid chemical	82/2431	332/18493	7.05442e-09	5.46405e-07	3.83787e-07	9314/7525/1956/19/598/80315/8324/1019/472/7422/1490/3066/2475/1938/5111/1723/84861/5914/5536/1291/8854/6472/4916/7528/360/28956/7298/56034/3658/4968/440/7520/1786/1282/6602/22938/8273/55004/207/6662/80310/5105/6714/1385/2308/3949/58528/7474/1906/340485/1051/6198/7494/6720/5915/4277/3297/729438/4915/83667/4067/6470/8651/5155/5562/7049/1843/10270/7584/6495/143686/64121/153129/3482/6935/836/22943/63…	82
GO:2001242	regulation of intrinsic apoptotic signaling pathway	49/2431	161/18493	7.29161e-09	5.57717e-07	3.91732e-07	4582/3091/596/598/4193/2023/3065/6188/10955/142/9709/7314/57805/7178/10059/6421/9529/10131/84447/5034/10105/3190/26155/4841/9774/10525/4170/29979/6154/8531/23411/960/207/6714/10625/5366/6498/5326/7494/259230/138151/6648/1654/29108/51060/57007/4102/55031/6591	49
GO:0006260	DNA replication	70/2431	268/18493	7.77069e-09	5.84766e-07	4.10731e-07	1956/472/92675/2956/8317/5111/997/6117/4171/4176/55388/4796/63967/6119/163859/9401/5428/8914/11198/8243/30968/51750/546/990/10189/9126/1663/51659/23244/80169/3978/10919/3265/4999/4774/6241/6418/5001/55159/26057/1660/6416/57697/3159/5930/4781/7270/6240/10714/4782/5515/9768/1763/116447/11200/4173/23649/5000/5558/5982/27343/4673/58525/4437/29803/54107/2069/51514/157570/4784	70
GO:0016049	cell growth	109/2431	485/18493	7.89634e-09	5.84766e-07	4.10731e-07	1026/7046/1956/596/7422/659/10298/3611/1490/6868/2475/9928/79960/4323/6597/84162/2023/57611/3304/1457/57805/84861/2045/4682/8085/3326/1029/1954/118813/9723/1785/4916/11054/7074/2335/6595/23499/28956/5361/8482/201163/1981/3020/2395/5925/5048/23411/2931/91/55004/207/6662/4088/7048/4089/6416/79602/7474/6446/5465/1808/4131/1906/3491/51393/3487/26585/9037/2016/9423/7414/83667/51199/1982/1027/65981/576…	109
GO:0098727	maintenance of cell number	46/2431	147/18493	7.93195e-09	5.84766e-07	4.10731e-07	6657/9314/8091/1994/5460/8324/1977/182/1000/79923/26354/10642/23019/6944/84376/8451/2309/8243/63976/9126/54623/27086/9968/79577/4849/4853/84750/673/6662/4089/2308/6659/8202/1656/388585/2146/7849/678/55124/7071/25836/2001/6774/57167/4087/10413	46
GO:0035690	cellular response to drug	86/2431	355/18493	8.14484e-09	5.93313e-07	4.16734e-07	664/9314/5530/8091/1956/3397/4609/1977/1019/5728/4193/3066/5580/1495/5111/6188/3326/5536/284996/7431/3728/2309/8914/3178/23367/10131/140885/546/5660/10105/1785/1663/5621/54434/54541/328/2395/60/8678/6262/23411/4208/2113/673/6662/80310/3586/5105/6714/2308/1906/4502/340485/1644/3569/6198/5908/1080/388/3297/2146/1398/729438/5860/196/5155/5594/5562/9688/11200/7023/4659/1317/23135/7128/5911/57332/7037…	86
GO:0045931	positive regulation of mitotic cell cycle	48/2431	157/18493	8.79019e-09	6.3279e-07	4.44463e-07	993/29766/1977/1019/3481/4193/9700/8317/3192/896/9401/8451/7175/23636/990/9555/894/9510/55920/11065/1981/5514/440/328/51529/8678/137886/5925/5048/5889/26057/1906/6198/940/3297/595/5155/5962/8452/5586/4204/1654/6790/25836/2069/51514/7015/1978	48
GO:0071453	cellular response to oxygen levels	54/2431	187/18493	9.98766e-09	7.10633e-07	4.99138e-07	664/3091/4609/596/80315/7422/4352/5728/4193/2475/7311/2023/2033/7316/7314/10059/2309/5034/4000/360/28996/3658/10525/6839/10869/8453/23576/29979/1387/867/23411/2034/207/5105/6714/6095/2308/5366/571/4194/1906/9550/6233/5562/677/112399/2627/10370/523/7291/5163/30001/7015/5468	54
GO:0006605	protein targeting	98/2431	424/18493	1.01804e-08	7.16022e-07	5.02923e-07	11140/6727/7311/6133/6747/134266/7534/3312/6138/26985/7316/3308/3921/6168/6188/6209/9349/6122/6218/6137/7314/6206/25873/60559/9765/27183/92609/6130/9141/55625/54543/6144/6159/8943/6129/5195/10452/57602/6187/6125/10055/6746/5621/51/29927/6160/93974/3265/79158/6202/6173/6232/54557/6143/4736/6154/6176/6210/6134/9045/5190/6192/6142/2931/6207/23204/10075/6229/84750/6720/89781/26521/2040/7532/6233/5533…	98
GO:0031570	DNA integrity checkpoint	48/2431	158/18493	1.10339e-08	7.67233e-07	5.38893e-07	5347/4582/1026/8091/472/4193/23019/2956/4303/2033/5111/25904/57805/63967/8563/1647/1874/8451/57646/8914/990/5514/9656/6154/55159/4849/84444/6659/4194/57551/51322/7027/835/988/1820/4850/10116/246175/1027/595/1763/9575/11200/6790/261726/25896/51514/3014	48
GO:0031056	regulation of histone modification	44/2431	139/18493	1.12833e-08	7.74091e-07	5.4371e-07	4582/472/7422/3481/54880/2648/6830/64324/546/4000/9555/54623/9320/10664/26155/26993/201163/3720/1786/6418/80349/23411/22938/4089/6879/26097/6720/5927/7320/5599/9757/10270/9252/4204/55124/26036/25836/7291/93649/9810/51043/23741/6591/8726	44
GO:0031647	regulation of protein stability	69/2431	265/18493	1.13855e-08	7.74091e-07	5.4371e-07	5347/1026/3397/596/5728/4193/11140/5580/6950/3312/2033/9349/2597/3304/2316/10694/57805/1857/2648/7917/3916/3326/284996/56926/57646/54543/9529/57602/5886/84447/4000/10574/6125/5621/7874/54344/3054/10869/4092/5217/483/79577/1387/5190/23411/4088/6714/1385/6659/4194/6789/26224/730094/7494/6720/89781/7320/7341/5594/8452/2043/11200/3845/6790/22848/29108/58525/55031/7015	69
GO:0019827	stem cell population maintenance	45/2431	144/18493	1.20397e-08	8.09571e-07	5.6863e-07	6657/9314/8091/1994/5460/8324/1977/182/1000/79923/26354/10642/23019/6944/84376/8451/2309/8243/63976/9126/54623/27086/9968/79577/4849/4853/84750/673/6662/4089/2308/6659/8202/1656/388585/7849/678/55124/7071/25836/2001/6774/57167/4087/10413	45
GO:0001666	response to hypoxia	78/2431	314/18493	1.24951e-08	8.31061e-07	5.83725e-07	664/3091/4609/596/472/7422/4352/5728/4193/6868/2475/4321/4323/7311/2023/2033/7316/7314/10059/54890/2309/81/126374/5034/4000/360/28996/3658/5352/10525/54541/6839/10869/8453/23576/29979/8678/1387/6262/23411/3939/2034/2113/207/4088/7048/4089/5105/6714/6095/1385/5366/571/4194/5465/1906/285/3297/4891/6233/7057/114757/5562/677/7049/112399/4204/2627/10370/57085/7291/93649/5163/7042/836/30001/7015/4314	78
GO:0006914	autophagy	105/2431	466/18493	1.28714e-08	8.37873e-07	5.88509e-07	664/3091/596/472/2475/11140/64419/8131/3312/7416/2033/5049/55578/23400/2597/5565/84861/27183/6625/149371/10059/27243/26086/4077/57617/23367/54543/1915/79443/57602/11180/23265/1213/7405/5660/10548/91445/28956/26100/201163/1981/2801/51715/93974/4170/128077/83452/826/7415/29979/10645/200576/8678/137886/140710/3146/23411/2931/55004/5747/207/6714/2308/140775/165324/58528/528/54874/51322/6093/7494/6720…	105
GO:0061919	process utilizing autophagic mechanism	105/2431	466/18493	1.28714e-08	8.37873e-07	5.88509e-07	664/3091/596/472/2475/11140/64419/8131/3312/7416/2033/5049/55578/23400/2597/5565/84861/27183/6625/149371/10059/27243/26086/4077/57617/23367/54543/1915/79443/57602/11180/23265/1213/7405/5660/10548/91445/28956/26100/201163/1981/2801/51715/93974/4170/128077/83452/826/7415/29979/10645/200576/8678/137886/140710/3146/23411/2931/55004/5747/207/6714/2308/140775/165324/58528/528/54874/51322/6093/7494/6720…	105
GO:0000375	RNA splicing via transesterification reactions	89/2431	377/18493	1.68268e-08	1.08382e-06	7.61262e-07	1994/10521/3191/10898/8570/3312/5725/26528/51645/8241/3192/4904/5430/10992/10594/10421/9092/57703/6625/23450/9416/10291/10084/3183/4670/3178/10657/6421/5094/3185/10081/4116/10236/10946/10189/11325/11338/3190/9967/23451/3181/10523/10949/23524/9939/10921/55339/5431/29890/8106/51759/6632/6633/2521/91746/11017/5093/23283/11051/22938/10073/10262/51585/51729/1660/23350/4154/11100/9128/22916/6434/988/92…	89
GO:2001252	positive regulation of chromosome organization	49/2431	165/18493	1.7682e-08	1.11407e-06	7.82508e-07	4582/472/7422/9700/26354/6950/3192/8550/10694/2648/3178/7175/6421/51750/546/4000/10574/9555/1663/54623/3181/26993/5514/3720/92345/7520/51529/1786/8678/5925/80349/23411/22938/4089/26097/6720/9869/5609/5594/8452/10270/9252/4204/55124/25836/9810/51043/6591/8726	49
GO:0030330	DNA damage response signal transduction by p53 class mediator	36/2431	104/18493	1.77933e-08	1.11407e-06	7.82508e-07	4582/4646/1026/8493/472/4193/23019/2033/5111/25904/1647/1874/2309/546/28996/6154/4849/23411/960/5366/6659/4194/7027/835/1820/4850/83667/246175/1027/11200/7023/6790/161742/7291/8444/6591	36
GO:0036294	cellular response to decreased oxygen levels	50/2431	170/18493	1.80078e-08	1.11407e-06	7.82508e-07	664/3091/4609/596/80315/7422/4352/5728/4193/2475/7311/2023/2033/7316/7314/10059/2309/5034/4000/360/28996/3658/10525/6839/10869/8453/23576/29979/1387/867/23411/2034/207/5105/6714/6095/5366/571/4194/1906/6233/5562/677/112399/2627/10370/7291/5163/30001/7015	50
GO:0030111	regulation of Wnt signaling pathway	77/2431	311/18493	1.80247e-08	1.11407e-06	7.82508e-07	6657/865/1956/8324/2099/3611/1000/85458/79960/83999/7088/9679/6597/3065/2889/1482/1457/57805/1857/57680/3728/2309/65125/1500/2010/7074/23499/7090/10076/83439/7415/9968/79577/23189/2931/6662/4088/6714/2308/10042/6659/6789/331/7474/8323/25987/4772/3487/26585/9037/27185/7320/10146/1452/65981/8932/5515/8326/8452/6934/4163/1654/387914/7128/100113407/56998/3675/64359/9839/22943/55031/2887/7015/6591/257…	77
GO:0000077	DNA damage checkpoint	45/2431	146/18493	1.92783e-08	1.17964e-06	8.28563e-07	5347/4582/1026/8091/472/4193/23019/2956/4303/2033/5111/25904/57805/63967/8563/1647/1874/8451/57646/5514/9656/6154/55159/4849/84444/6659/4194/57551/51322/7027/835/988/1820/4850/10116/246175/1027/595/9575/11200/6790/261726/25896/51514/3014	45
GO:0007178	transmembrane receptor protein serine/threonine kinase signaling pathway	82/2431	340/18493	2.23195e-08	1.35221e-06	9.4977e-07	7046/3397/659/3611/6868/50848/9372/7311/5796/2033/7316/142/23144/7314/1482/170261/9765/409/3326/7431/5045/2201/1954/63976/1785/6711/8516/28996/201163/11167/56963/10220/4092/79176/51496/1387/6262/867/23411/22938/91/5747/6664/4088/4090/7048/4089/6714/1385/9480/331/7474/6498/3491/4091/388585/26585/7554/6233/644815/7057/9688/10637/7049/10370/23089/91851/3675/26036/7071/51341/93649/6935/5829/7042/4087…	82
GO:0000377	RNA splicing via transesterification reactions with bulged adenosine as nucleophile	88/2431	374/18493	2.38423e-08	1.41642e-06	9.94872e-07	1994/10521/3191/10898/3312/5725/26528/51645/8241/3192/4904/5430/10992/10594/10421/9092/57703/6625/23450/9416/10291/10084/3183/4670/3178/10657/6421/5094/3185/10081/4116/10236/10946/10189/11325/11338/3190/9967/23451/3181/10523/10949/23524/9939/10921/55339/5431/29890/8106/51759/6632/6633/2521/91746/11017/5093/23283/11051/22938/10073/10262/51585/51729/1660/23350/4154/11100/9128/22916/6434/988/9295/64…	88
GO:0000398	mRNA splicing via spliceosome	88/2431	374/18493	2.38423e-08	1.41642e-06	9.94872e-07	1994/10521/3191/10898/3312/5725/26528/51645/8241/3192/4904/5430/10992/10594/10421/9092/57703/6625/23450/9416/10291/10084/3183/4670/3178/10657/6421/5094/3185/10081/4116/10236/10946/10189/11325/11338/3190/9967/23451/3181/10523/10949/23524/9939/10921/55339/5431/29890/8106/51759/6632/6633/2521/91746/11017/5093/23283/11051/22938/10073/10262/51585/51729/1660/23350/4154/11100/9128/22916/6434/988/9295/64…	88
GO:0042176	regulation of protein catabolic process	88/2431	375/18493	2.7209e-08	1.60088e-06	1.12444e-06	5347/1956/7077/5728/122809/4193/9491/4130/9349/23400/9709/7314/3304/2316/1457/57805/7917/6625/3326/23450/5045/5708/1915/4478/9529/25897/51035/5886/6125/4898/28996/11060/7874/7327/7430/5310/93974/23163/10869/64110/4092/4905/9695/7415/29979/4953/2931/152503/6599/5747/207/6662/4088/3586/160418/2308/3949/165324/4194/7474/51322/6093/28951/255488/1452/1027/9870/26234/7341/55432/9655/5962/5887/57449/849…	88
GO:0001558	regulation of cell growth	95/2431	416/18493	3.18907e-08	1.85847e-06	1.30536e-06	1026/7046/1956/596/7422/659/10298/3611/1490/6868/2475/9928/79960/4323/6597/84162/2023/57611/3304/1457/57805/84861/2045/4682/1029/1954/118813/9723/1785/4916/11054/2335/6595/23499/28956/8482/201163/1981/3020/2395/5925/5048/23411/2931/91/55004/207/4088/4089/79602/7474/6446/5465/1808/4131/1906/3491/51393/3487/26585/9037/9423/83667/1982/1027/65981/57699/7251/6197/54910/5515/3021/694/343472/440093/3488…	95
GO:0007179	transforming growth factor beta receptor signaling pathway	54/2431	193/18493	3.28487e-08	1.89623e-06	1.33189e-06	7046/3397/659/6868/50848/9372/7311/5796/2033/7316/142/7314/409/3326/5045/2201/63976/1785/8516/28996/201163/4092/1387/867/23411/22938/91/5747/6664/4088/4090/7048/4089/6714/1385/9480/6498/4091/6233/7057/10637/7049/10370/23089/3675/26036/7071/51341/93649/6935/5829/7042/4087/10979	54
GO:0002181	cytoplasmic translation	33/2431	93/18493	3.4717e-08	1.98536e-06	1.39448e-06	80315/2475/6133/1938/8663/6138/92715/8662/25873/1802/16/8562/10480/6159/51441/8664/6160/1981/6173/51182/6143/4736/6154/6176/8531/6142/8661/1660/7458/6171/51389/23521/1978	33
GO:0043200	response to amino acid	37/2431	111/18493	3.55861e-08	2.01622e-06	1.41616e-06	1956/598/80315/1490/2475/5111/1723/84861/1291/28956/56034/3658/440/1786/1282/55004/80310/5105/1385/58528/1906/1051/6198/7494/3297/729438/4915/83667/4067/8651/6495/143686/64121/153129/6935/836/53335	37
GO:0048545	response to steroid hormone	90/2431	390/18493	4.37477e-08	2.45589e-06	1.72498e-06	1026/865/1956/596/1977/2099/10521/1490/4193/2288/23019/7182/490/6597/3065/3192/2033/5111/142/8085/5914/409/5536/2101/2309/8856/10081/7376/4916/9967/5901/7298/8204/9611/10076/54541/27086/9968/3146/5925/477/6294/23411/7048/3586/9612/5105/6714/6095/2308/801/7533/6879/8202/153222/1408/5465/1906/11057/9975/3569/6198/6720/5915/2560/2649/2274/595/7057/23543/5187/9575/677/1843/58/678/7023/3845/7026/51389…	90
GO:0071824	protein-DNA complex subunit organization	72/2431	290/18493	4.59833e-08	2.54274e-06	1.78598e-06	4609/2099/554313/7311/8970/6597/6944/5757/6046/7316/3070/142/9349/6117/4171/7314/6119/440689/8451/8366/6830/11198/6908/8349/546/10847/9555/29855/6878/54623/6601/3017/121504/10664/8339/26038/333932/3005/3020/2965/6418/8364/3146/5925/6602/6599/6662/8467/1385/55166/6879/3159/85236/7343/6233/144108/8520/3021/8356/10541/5887/11339/23126/440093/55729/4673/128312/7067/54107/79172/8343/3014	72
GO:0071902	positive regulation of protein serine/threonine kinase activity	78/2431	323/18493	4.61259e-08	2.54274e-06	1.78598e-06	7046/1956/4215/7422/2321/3481/3611/5608/7311/7316/896/2889/6188/8550/7314/9693/1857/1647/3326/51495/9261/990/894/4916/7074/28956/56034/9500/10746/3265/6850/151195/9802/1849/23411/8325/673/6416/80310/5871/4296/8491/6714/801/22924/6789/7474/57551/2149/1906/805/389432/2146/1398/1163/6233/4293/5609/1164/595/5155/7057/5594/5515/5562/1399/2043/10818/54956/3845/1654/1848/2357/958/9839/51196/22943/7335	78
GO:0071456	cellular response to hypoxia	47/2431	160/18493	4.97564e-08	2.70689e-06	1.90128e-06	664/3091/4609/596/7422/4352/5728/4193/2475/7311/2023/2033/7316/7314/2309/5034/4000/360/28996/3658/10525/6839/10869/8453/23576/29979/1387/23411/2034/207/5105/6714/6095/5366/571/4194/1906/6233/5562/677/112399/2627/10370/7291/5163/30001/7015	47
GO:0009141	nucleoside triphosphate metabolic process	75/2431	307/18493	4.99884e-08	2.70689e-06	1.90128e-06	3091/4521/4697/3615/3312/2023/142/506/7167/7386/2597/215/3304/514/4705/10059/3098/283209/5214/226/30968/6391/4706/79077/6472/3614/10105/131870/5901/7298/2584/201163/1537/1503/441531/5223/9611/51715/54541/230/93974/4719/4718/2395/498/7415/4704/9377/10632/9567/51562/4695/477/6901/4833/3692/3939/51727/1352/201626/5465/4731/1355/8604/205/5562/4204/5571/64802/4720/4338/523/51341/6774/515	75
GO:0031503	protein-containing complex localization	70/2431	280/18493	5.2508e-08	2.81839e-06	1.97959e-06	1977/472/2288/10898/10482/5036/3192/3921/6209/23144/8563/149371/1759/54890/6830/23049/7175/6421/8943/23636/4116/10189/1785/1741/11338/10762/163/5901/3181/26993/55920/7430/9939/10921/55339/29890/8106/3265/4092/91746/55781/1984/59283/3692/9818/3690/56647/26097/22916/9295/6432/23165/11158/55333/5433/6427/9631/138151/9688/8976/83903/348995/9903/9775/22871/11097/8650/23237/6809/5649	70
GO:0071383	cellular response to steroid hormone stimulus	66/2431	259/18493	5.75969e-08	3.06465e-06	2.15257e-06	865/1956/1977/2099/10521/2288/23019/7182/490/6597/3065/3192/2033/142/8085/5914/409/5536/2101/2309/8856/7376/9967/5901/8204/9611/54541/27086/9968/5925/477/6294/23411/9612/5105/6714/6095/2308/7533/6879/8202/153222/1408/5465/1906/11057/9975/6198/5915/2649/2274/23543/5187/9575/677/678/7023/7026/51389/7421/7067/51341/5468/1978/2908/10413	66
GO:0009144	purine nucleoside triphosphate metabolic process	71/2431	287/18493	6.63093e-08	3.49781e-06	2.45681e-06	3091/4521/4697/3615/3312/2023/142/506/7167/7386/2597/215/3304/514/4705/10059/3098/283209/5214/226/30968/6391/4706/6472/3614/10105/131870/5901/2584/201163/1537/441531/5223/9611/51715/54541/230/93974/4719/4718/2395/498/7415/4704/9377/10632/9567/51562/4695/477/6901/4833/3692/3939/1352/201626/5465/4731/1355/8604/205/5562/4204/5571/64802/4720/4338/523/51341/6774/515	71
GO:0030099	myeloid cell differentiation	92/2431	405/18493	6.81968e-08	3.56664e-06	2.50515e-06	3091/6772/865/29766/3205/4609/2313/114609/7422/4352/182/2475/554313/8761/2778/3065/2033/142/3304/2194/8563/9948/87/8085/11091/5914/3313/2101/8451/8366/2309/1021/58508/54623/121504/26523/28996/3658/333932/93974/4343/27086/3020/79577/1387/8364/3146/5925/5048/3692/80349/23411/91/4853/4208/2034/2113/4090/7048/6714/1385/5814/1051/4850/2739/4891/4067/7057/23543/3021/8356/5316/9757/677/7049/10221/10766/…	92
GO:0003279	cardiac septum development	36/2431	109/18493	7.07932e-08	3.64365e-06	2.55925e-06	7046/6092/659/182/4193/8131/55636/1482/5914/7798/1785/163/7468/4092/84516/4853/6664/7048/4089/6659/7474/3491/4091/5915/7849/23129/9784/7049/9421/2627/10818/10370/57167/7042/4488/57493	36
GO:0006333	chromatin assembly or disassembly	53/2431	192/18493	7.15085e-08	3.64365e-06	2.55925e-06	8091/554313/8970/6597/6046/3070/4171/440689/8366/1029/11198/7175/8349/546/9555/29855/54623/6601/3017/121504/10664/26155/8339/9219/333932/3005/9031/3020/6418/23347/8364/3146/6602/6599/6662/8467/55166/3159/85236/144108/8520/9874/3021/8356/10541/11339/440093/4673/128312/54107/79172/8343/3014	53
GO:0010769	regulation of cell morphogenesis involved in differentiation	72/2431	293/18493	7.16636e-08	3.64365e-06	2.55925e-06	5530/3397/6092/7422/4352/5728/659/4739/3611/1000/57611/9693/2316/23654/2045/10059/10084/81/1954/118813/9723/1785/4916/347733/7074/2335/23499/5361/8482/55920/54434/6281/5048/23189/5747/6239/673/7533/7474/6498/1808/4131/10562/1398/80823/51393/4915/9037/9423/23129/51199/2011/65981/7070/54910/1399/343472/2043/2803/7143/5911/6259/22871/4076/11141/9706/9839/10611/23237/253725/3984/5649	72
GO:0010770	positive regulation of cell morphogenesis involved in differentiation	44/2431	147/18493	7.20514e-08	3.64365e-06	2.55925e-06	6092/7422/4352/659/4739/3611/57611/2316/23654/10059/1954/118813/1785/4916/347733/7074/2335/23499/5361/8482/6281/5048/6239/673/6498/4131/10562/1398/80823/51393/4915/9037/9423/23129/51199/65981/1399/2043/2803/4076/11141/9839/3984/5649	44
GO:0034614	cellular response to reactive oxygen species	47/2431	162/18493	7.56197e-08	3.77541e-06	2.65179e-06	664/9314/1956/4193/3066/5580/5796/5111/6188/7001/5536/2309/10131/140885/5660/10105/1785/328/2395/5052/10645/8678/23411/2113/207/80310/3586/6714/2308/3569/388/3297/2146/1398/5599/5594/5562/9688/6648/23135/7128/57332/2241/7168/5829/4314/3934	47
GO:0140014	mitotic nuclear division	69/2431	277/18493	7.58908e-08	3.77541e-06	2.65179e-06	5347/472/3481/9928/9700/3796/3192/896/283489/55154/3837/9918/3304/2316/9587/84861/9184/27183/27243/7175/8243/23383/23636/899/546/990/9126/9555/894/23244/5901/26993/11065/2801/4288/900/54820/55781/51529/56984/64682/8678/137886/5925/9133/1906/56647/940/11004/27338/595/5155/9493/699/79598/8452/126731/23126/1843/11200/83903/10270/8697/29127/6790/25836/2069/9088/4605	69
GO:0000302	response to reactive oxygen species	59/2431	224/18493	8.29522e-08	4.09342e-06	2.87516e-06	664/9314/6772/1956/596/4193/3066/5580/5796/84919/1938/5111/6188/7001/5536/2309/10131/140885/5660/10105/1785/328/2395/5052/10645/8678/23411/3939/2113/207/80310/3586/6714/2308/1906/3569/388/3297/2146/1398/83667/5599/5594/5562/3840/9688/6648/1843/143686/23135/7128/57332/2241/7168/5829/836/8061/4314/3934	59
GO:0007623	circadian rhythm	53/2431	193/18493	8.6144e-08	4.21692e-06	2.9619e-06	1956/3397/1019/5054/5728/3066/3615/3191/3065/3192/2033/57805/8914/6421/10236/5500/4916/9967/7298/8204/9500/4841/9611/6839/4704/23411/9956/6095/1385/1408/26224/5465/3400/9975/1644/6720/2146/1390/5927/4915/80045/196/5599/5562/4987/5187/9575/7071/22871/1406/5078/9475/5468	53
GO:0001701	in utero embryonic development	75/2431	311/18493	8.83048e-08	4.28839e-06	3.0121e-06	3091/7046/1956/598/5460/7422/3481/130507/2186/55636/7779/6768/2648/57448/321/57680/8451/4836/10959/30812/285855/201163/5310/9394/9546/29123/10672/2885/4097/8531/4849/51119/8533/91/9133/2034/207/4088/7048/4089/3586/4154/6789/5930/6498/1906/1051/3491/3297/55224/2016/7320/5155/5594/10049/8452/677/1603/9421/2627/27341/7026/3714/57178/7168/4952/57167/7291/4087/118/57493/1050/8061/2296/22846	75
GO:0001649	osteoblast differentiation	57/2431	214/18493	9.03222e-08	4.35182e-06	3.05665e-06	6657/865/3397/659/182/3481/3611/2778/3192/6209/506/3376/2194/1291/2101/4077/3183/1021/2201/51564/1213/10189/30812/8482/3572/3020/9188/4208/5747/1660/207/6664/4088/4090/64093/3400/1051/3569/3491/121340/4091/26585/23051/2274/4921/3021/23314/3488/56998/7291/3570/4209/4488/1050/6591/117581/58476	57
GO:0006406	mRNA export from nucleus	36/2431	110/18493	9.20347e-08	4.36558e-06	3.06632e-06	1977/10898/10482/23144/8563/54890/6830/23049/7175/23636/4116/10189/11338/10762/3181/26993/9939/10921/55339/29890/8106/91746/1984/9818/26097/22916/9295/6432/23165/5433/6427/9631/9688/348995/9775/11097	36
GO:0071427	mRNA-containing ribonucleoprotein complex export from nucleus	36/2431	110/18493	9.20347e-08	4.36558e-06	3.06632e-06	1977/10898/10482/23144/8563/54890/6830/23049/7175/23636/4116/10189/11338/10762/3181/26993/9939/10921/55339/29890/8106/91746/1984/9818/26097/22916/9295/6432/23165/5433/6427/9631/9688/348995/9775/11097	36
GO:0031098	stress-activated protein kinase signaling cascade	75/2431	313/18493	1.1665e-07	5.49063e-06	3.85653e-06	1956/4215/4609/114609/3480/8324/7422/10298/1490/10550/5608/2873/7311/7316/2889/6188/7314/1857/1647/4077/51495/9261/3156/140885/7074/28996/9748/7430/9611/10746/3265/6850/8454/5052/3146/5048/64853/8325/207/6416/5871/4296/8491/2308/6789/7474/57551/5062/1906/389432/6233/4293/5609/4067/54910/5599/5594/1399/5187/677/2043/1843/10221/5911/9965/29108/57144/2218/7042/9839/22943/23008/10771/7335/4790	75
GO:0009205	purine ribonucleoside triphosphate metabolic process	69/2431	280/18493	1.1864e-07	5.54168e-06	3.89239e-06	3091/4697/3615/3312/2023/142/506/7167/7386/2597/215/3304/514/4705/10059/3098/283209/5214/226/30968/6391/4706/6472/3614/10105/5901/2584/201163/1537/441531/5223/9611/51715/54541/230/93974/4719/4718/2395/498/7415/4704/9377/10632/9567/51562/4695/477/6901/4833/3692/3939/1352/201626/5465/4731/1355/8604/205/5562/4204/5571/64802/4720/4338/523/51341/6774/515	69
GO:0042770	signal transduction in response to DNA damage	40/2431	130/18493	1.22435e-07	5.67559e-06	3.98645e-06	5347/4582/4646/1026/8493/472/4193/23019/2033/5111/25904/1647/1874/2309/546/28996/2885/6154/4849/23411/960/5366/6659/4194/7027/835/988/1820/4850/83667/246175/1027/11200/7023/6790/161742/7291/8444/51514/6591	40
GO:0071230	cellular response to amino acid stimulus	26/2431	67/18493	1.23696e-07	5.69097e-06	3.99725e-06	1956/598/80315/2475/84861/1291/28956/56034/1786/1282/55004/80310/58528/1051/7494/3297/729438/4915/83667/8651/6495/143686/64121/153129/6935/53335	26
GO:0009199	ribonucleoside triphosphate metabolic process	70/2431	286/18493	1.27913e-07	5.84102e-06	4.10265e-06	3091/4697/3615/3312/2023/142/506/7167/7386/2597/215/3304/514/4705/10059/3098/283209/5214/226/30968/6391/4706/6472/3614/10105/5901/2584/201163/1537/1503/441531/5223/9611/51715/54541/230/93974/4719/4718/2395/498/7415/4704/9377/10632/9567/51562/4695/477/6901/4833/3692/3939/1352/201626/5465/4731/1355/8604/205/5562/4204/5571/64802/4720/4338/523/51341/6774/515	70
GO:0045930	negative regulation of mitotic cell cycle	69/2431	281/18493	1.37373e-07	6.22656e-06	4.37344e-06	9314/5347/4582/1026/8091/1956/596/598/472/7077/5728/10217/4193/79960/23019/2956/4303/2033/5111/25904/63967/9587/84861/9184/1647/27183/10106/1874/10950/7175/546/990/5514/3265/90480/9656/56984/8454/6154/79577/5925/55159/4849/4088/3586/64859/6659/4194/57551/7027/835/2146/1820/4850/246175/1027/595/138151/2619/699/694/677/1843/11200/678/6790/55055/55031/2296	69
GO:0034329	cell junction assembly	61/2431	238/18493	1.45032e-07	6.52538e-06	4.58333e-06	865/6624/596/7422/5728/3611/1000/50848/4323/5796/1495/7082/2889/9693/2316/9948/87/8394/3728/81/51564/1500/5339/2335/23499/667/201163/55920/9748/204851/57662/4649/4092/6281/60/5747/4088/6714/64398/6093/5908/26585/7414/9231/7070/7057/6801/5586/54751/1004/92140/79834/71/7145/100506658/57493/9475/389/999/6591/10979	61
GO:1901991	negative regulation of mitotic cell cycle phase transition	52/2431	191/18493	1.53603e-07	6.86057e-06	4.81876e-06	9314/5347/4582/1026/8091/596/472/5728/10217/4193/79960/23019/2956/4303/2033/5111/25904/63967/84861/9184/1647/27183/10106/1874/7175/990/56984/8454/6154/79577/5925/55159/4849/6659/4194/57551/7027/835/2146/1820/4850/246175/1027/595/138151/699/677/1843/11200/678/6790/55031	52
GO:0006367	transcription initiation from RNA polymerase II promoter	51/2431	186/18493	1.57938e-07	7.00308e-06	4.91886e-06	1026/865/8493/1019/2099/1490/7182/5430/1482/5914/2101/6908/112950/8148/8856/7376/4150/6878/9967/5431/29959/2965/9968/1387/3146/892/22938/6877/4853/6662/6095/1385/6879/5465/1871/9975/5915/5433/2649/595/2961/56998/26036/55729/7421/7067/2962/5468/2908/10413/5434	51
GO:0042542	response to hydrogen peroxide	42/2431	141/18493	1.64343e-07	7.18298e-06	5.04522e-06	664/9314/6772/596/4193/3066/5580/84919/1938/5111/6188/5536/2309/10131/140885/5660/10105/328/2395/8678/23411/3939/2113/80310/3586/6714/2308/3569/388/3297/2146/1398/5562/3840/9688/1843/23135/7128/57332/836/8061/3934	42
GO:0071236	cellular response to antibiotic	42/2431	141/18493	1.64343e-07	7.18298e-06	5.04522e-06	664/9314/5728/4193/3066/5580/5111/6188/9349/5536/2309/8914/3178/23367/10131/140885/5660/10105/1663/328/2395/8678/23411/4208/2113/80310/3586/2308/3569/1080/388/3297/2146/1027/196/5155/5562/9688/23135/7128/57332/3934	42
GO:0002064	epithelial cell development	54/2431	202/18493	1.71539e-07	7.4443e-06	5.22877e-06	688/3091/1026/3397/2099/182/50848/5420/23094/286451/7082/2889/6768/9693/2316/2194/5914/1874/7431/5991/1021/4478/546/30812/7298/7430/57826/5048/2931/2317/6662/51742/25932/22862/7716/9480/7474/6093/5908/7494/25803/5915/10116/5155/5962/9688/9575/10818/26051/23022/137964/118/57493/9475	54
GO:0071103	DNA conformation change	69/2431	283/18493	1.83547e-07	7.90934e-06	5.5554e-06	8091/554313/8970/6046/1108/2547/3070/6117/4171/4176/9918/440689/9401/57680/8366/1029/7175/51750/8349/546/9555/1663/29855/54623/3017/121504/10664/51659/26155/8339/3181/26993/26038/333932/3005/3020/7520/6418/23347/8364/3146/1105/1660/6662/8467/55166/3159/85236/144108/8520/10146/3149/3021/8356/10541/1763/116447/11339/4173/10270/440093/1654/4673/25836/128312/54107/79172/8343/3014	69
GO:0044783	G1 DNA damage checkpoint	25/2431	64/18493	1.85258e-07	7.92725e-06	5.56798e-06	4582/1026/472/4193/23019/2033/5111/25904/1647/1874/6154/55159/4849/6659/4194/51322/7027/835/1820/4850/246175/1027/595/11200/6790	25
GO:0031330	negative regulation of cellular catabolic process	62/2431	245/18493	1.87707e-07	7.97625e-06	5.6024e-06	1994/596/1676/114609/7077/2475/10642/9491/8241/3192/4904/4130/9349/23400/1457/57805/84861/7917/6625/3326/5045/3183/9261/23367/9529/57602/167153/11180/51035/9967/6125/28996/10949/7874/7327/1981/2801/54541/4170/92345/10869/8678/8531/2931/6599/5747/1660/207/3586/54855/140775/5465/51322/6093/1982/8604/55432/2043/64802/29843/6774/56893	62
GO:0001503	ossification	86/2431	380/18493	2.15199e-07	9.08138e-06	6.37863e-06	6657/3091/865/1956/1959/3397/2261/4322/596/659/182/3481/3611/1490/83999/4323/54880/2778/3192/6209/506/3376/2194/1291/2101/4077/3183/1021/2201/51564/1213/10189/196527/30812/8482/3572/3020/79176/9188/51119/4208/5747/1660/207/6662/6664/4088/4090/64093/56172/7474/3400/55787/1051/3569/3491/121340/4091/26585/23051/2274/4921/5594/3021/8326/23314/10766/3488/91851/4325/1836/56998/7071/25836/7067/7291/3570…	86
GO:0006473	protein acetylation	53/2431	199/18493	2.52984e-07	1.06028e-05	7.44724e-06	4582/3066/79960/9329/2033/10933/2648/7917/11091/4191/10847/10664/26155/201163/26038/3054/26471/57634/79969/9643/6418/54386/1387/51562/23411/27097/6877/8295/4089/5105/2308/6659/6879/8202/122830/57551/51126/8520/5562/5187/9575/9252/4204/55124/51200/26036/7291/93649/54107/157570/23741/6591/64769	53
GO:1900034	regulation of cellular response to heat	20/2431	45/18493	2.57942e-07	1.0737e-05	7.54153e-06	472/2475/2288/3312/2033/6117/3304/57805/6119/3326/9261/9529/7531/1387/23411/3297/5594/10049/9530/573	20
GO:0034976	response to endoplasmic reticulum stress	65/2431	264/18493	2.82522e-07	1.16807e-05	8.20438e-06	596/84919/1938/83590/2033/10955/9709/7917/10106/10613/37/3068/51035/84447/5034/4000/1663/91445/55161/7327/56886/10525/440/9797/54431/10869/488/9695/7415/54557/29979/8720/23411/2931/160418/5366/4189/153222/1051/8795/7494/10277/10206/23071/83667/595/7057/116496/55432/9217/11153/6782/6734/54956/10130/54499/80267/51060/168620/3576/30001/6745/55666/118/4102	65
GO:2001243	negative regulation of intrinsic apoptotic signaling pathway	32/2431	96/18493	2.92576e-07	1.19572e-05	8.39858e-06	4582/3091/596/598/4193/2023/3065/9709/57805/7178/9529/10131/84447/10105/26155/4841/10525/4170/8531/23411/960/207/6714/10625/7494/6648/1654/51060/57007/4102/55031/6591	32
GO:0010506	regulation of autophagy	72/2431	303/18493	2.93117e-07	1.19572e-05	8.39858e-06	664/3091/596/472/2475/11140/8131/7416/2033/5049/23400/2597/84861/6625/149371/10059/26086/23367/54543/1915/79443/57602/11180/23265/7405/5660/28956/201163/1981/2801/93974/4170/826/10645/200576/8678/140710/3146/23411/2931/55004/5747/207/2308/140775/58528/528/51322/6093/7494/6720/10206/9550/4943/83667/1982/27131/256471/5599/5562/143686/64121/29108/153129/523/9706/10558/92140/836/8992/56893/58476	72
GO:0042769	DNA damage response detection of DNA damage	18/2431	38/18493	3.14277e-07	1.27355e-05	8.94524e-06	8091/7311/7316/5111/6188/142/6117/7314/6119/8451/7398/6659/7320/6233/10714/56852/5982/51514	18
GO:0060537	muscle tissue development	88/2431	395/18493	3.2399e-07	1.30427e-05	9.16102e-06	688/5530/7046/1959/596/8324/7422/5728/10521/2475/11149/8131/1938/55636/6840/3192/2033/1482/2648/5914/409/8854/3156/4000/30812/2010/8516/79784/3720/26471/10869/3344/4092/8531/5925/6901/6262/2931/4208/2317/6662/6664/4088/7048/4089/6416/2066/5292/1385/10472/7474/5465/1906/9975/6198/5915/10277/26585/26011/2274/5562/5573/7049/905/58/9421/2627/10818/1073/3488/6495/23135/7026/59269/7168/4223/7291/93649/…	88
GO:0060147	regulation of posttranscriptional gene silencing	29/2431	83/18493	3.37271e-07	1.3401e-05	9.41268e-06	5530/131405/1956/1994/5460/2099/554313/5430/23369/8366/126374/121504/26523/1981/9611/333932/5431/3020/8364/1660/9612/5433/3021/8356/27161/6774/7015/5468/5434	29
GO:0060966	regulation of gene silencing by RNA	29/2431	83/18493	3.37271e-07	1.3401e-05	9.41268e-06	5530/131405/1956/1994/5460/2099/554313/5430/23369/8366/126374/121504/26523/1981/9611/333932/5431/3020/8364/1660/9612/5433/3021/8356/27161/6774/7015/5468/5434	29
GO:0010639	negative regulation of organelle organization	86/2431	384/18493	3.46898e-07	1.36712e-05	9.60243e-06	664/5347/29766/598/472/23075/2764/5580/9700/2288/11151/54880/3192/142/4171/84861/9184/4682/2648/409/10059/27243/6830/3183/3178/7175/899/51750/546/4000/9555/10105/1785/9320/6711/26155/80169/201163/3720/57662/3005/58526/9168/3020/5217/4134/2395/7520/56984/3638/1786/6418/54386/8678/23189/23411/207/4089/6714/140775/6879/3159/57551/120/5927/7320/4591/23271/3021/699/79598/5962/8326/5573/1843/4204/9530/…	86
GO:0018205	peptidyl-lysine modification	82/2431	361/18493	3.48538e-07	1.36712e-05	9.60243e-06	4582/1959/4193/3066/79960/9329/26354/54880/2033/10933/2648/7917/8085/11091/6830/79813/51564/4706/64324/58508/546/63976/10847/4000/9555/2145/10664/10055/26155/7468/201163/26038/3054/10919/5352/3720/57634/6839/10054/79969/9643/1786/6418/1387/51562/80349/23411/22938/27097/84444/6877/8295/4089/51742/6659/6879/8202/9869/2146/8520/7341/7799/5562/5187/9757/9575/8535/9252/4204/55124/51200/26036/29843/729…	82
GO:0043393	regulation of protein binding	56/2431	217/18493	3.63964e-07	1.41823e-05	9.96144e-06	5347/7046/3397/596/114609/5580/1522/2033/9709/9693/409/3326/26086/5195/64400/4043/1663/7074/5901/28996/5310/2801/26119/129531/60/4208/64853/207/3586/6714/22924/6789/7474/5465/6093/3297/1398/27185/23129/2011/65981/5155/5599/5515/7049/2043/6934/6790/5792/56998/151636/22943/118/2962/7015/4931	56
GO:0032200	telomere organization	47/2431	170/18493	3.66204e-07	1.41823e-05	9.96144e-06	4609/472/554313/26354/6950/2547/3192/5111/142/6117/8550/10694/6119/3326/9401/8366/23049/3183/3178/5892/51750/546/10574/121504/80169/3181/7874/5514/92345/328/3020/7520/54386/8364/5889/84444/6714/5609/10714/5594/3021/8356/1763/23649/5558/5982/7015	47
GO:0014706	striated muscle tissue development	85/2431	379/18493	3.80384e-07	1.46388e-05	1.02821e-05	688/5530/7046/1959/596/8324/7422/5728/10521/2475/11149/8131/1938/55636/6840/3192/2033/1482/2648/5914/409/8854/3156/4000/30812/2010/79784/3720/26471/10869/3344/4092/8531/5925/6901/6262/2931/4208/2317/6664/4088/7048/4089/6416/2066/5292/1385/10472/7474/5465/1906/9975/6198/5915/10277/26585/26011/2274/5562/5573/7049/905/58/9421/2627/10818/1073/6495/23135/7026/59269/7168/4223/7291/93649/136319/7042/229…	85
GO:0043401	steroid hormone mediated signaling pathway	51/2431	191/18493	3.88086e-07	1.48419e-05	1.04247e-05	865/2099/10521/2288/23019/7182/6597/3065/2033/142/8085/5914/409/5536/2101/8856/7376/9967/5901/8204/9611/27086/9968/5925/6294/23411/9612/6714/6095/7533/6879/8202/153222/1408/5465/11057/9975/5915/2649/2274/23543/5187/9575/7026/51389/7421/7067/51341/5468/2908/10413	51
GO:0051099	positive regulation of binding	49/2431	181/18493	4.16815e-07	1.58416e-05	1.11269e-05	9314/8091/114609/3191/8663/2033/142/9709/9693/5914/8721/3326/26086/23383/8664/64400/1663/7074/5901/28996/1981/5310/3005/6281/3146/5925/4208/1660/22924/6789/7474/805/3297/23129/65981/8932/5515/2043/6934/151636/25836/7291/93649/118/7015/5468/4931/4760/2296	49
GO:0032984	protein-containing complex disassembly	74/2431	317/18493	4.23143e-07	1.59828e-05	1.12261e-05	664/29766/4609/3480/23075/6597/3796/3312/219927/9349/1857/27183/9948/6150/8562/26589/27243/116541/23401/11198/64960/5195/79443/327/7405/28973/6601/6711/64978/54541/57662/90480/58526/55239/7818/6183/128077/51650/4905/7415/5018/29979/1984/143244/6418/6602/9829/6599/140775/3159/57551/120/9037/11222/4943/11004/6182/54460/1452/7251/23271/51258/5962/126731/1073/51474/79752/81631/136319/8444/118/253725/…	74
GO:0007093	mitotic cell cycle checkpoint	46/2431	166/18493	4.51585e-07	1.68491e-05	1.18345e-05	5347/4582/1026/8091/598/472/4193/23019/2956/4303/2033/5111/25904/63967/9587/84861/9184/1647/27183/1874/7175/990/5514/3265/9656/56984/6154/5925/55159/4849/64859/6659/4194/57551/7027/835/1820/4850/246175/1027/595/699/1843/11200/6790/55055	46
GO:2000045	regulation of G1/S transition of mitotic cell cycle	46/2431	166/18493	4.51585e-07	1.68491e-05	1.18345e-05	9314/4582/1026/596/472/5728/10217/4193/9928/79960/23019/2033/896/5111/25904/1647/10106/1874/8451/990/894/9510/1981/328/6154/79577/5925/55159/4849/26057/6659/4194/7027/835/2146/1820/4850/246175/1027/595/138151/5962/11200/1654/6790/7015	46
GO:0051403	stress-activated MAPK cascade	68/2431	284/18493	4.60955e-07	1.70945e-05	1.20069e-05	1956/4215/4609/114609/3480/8324/7422/1490/10550/2873/7311/7316/2889/6188/7314/1857/1647/4077/51495/9261/3156/140885/7074/28996/7430/9611/10746/3265/6850/8454/5052/3146/5048/64853/8325/207/6416/5871/4296/8491/2308/7474/57551/1906/389432/6233/4293/5609/54910/5599/5594/1399/5187/677/2043/1843/10221/5911/9965/29108/2218/7042/9839/22943/23008/10771/7335/4790	68
GO:0035967	cellular response to topologically incorrect protein	43/2431	151/18493	4.69918e-07	1.73218e-05	1.21666e-05	84919/3312/2033/9709/3304/7917/10106/3313/37/3068/84447/4000/1663/91445/55161/56886/10525/440/9797/9695/51182/80311/7415/8720/2931/4189/153222/7494/3297/595/55432/9217/8452/11153/6782/6734/54956/10130/168620/3576/30001/6745/118	43
GO:0032386	regulation of intracellular transport	92/2431	422/18493	4.90034e-07	1.79552e-05	1.26115e-05	4193/11149/5580/1138/9221/23144/23400/56681/2316/3916/3326/10059/321/9141/6830/3728/57617/10657/7175/5116/54543/1778/4478/375/23636/57602/2010/10055/5621/7327/26993/9919/7430/51715/93974/3265/26119/6850/7531/488/5217/9695/55781/3638/8723/51496/23411/2931/9818/10075/1660/673/4088/6714/801/57506/4131/22916/5908/6720/89781/2040/143425/54471/4067/392/64328/5594/57102/55432/2619/10541/5962/5562/815/51…	92
GO:0048608	reproductive structure development	93/2431	428/18493	4.96678e-07	1.80356e-05	1.2668e-05	3091/7046/3205/1956/596/598/6092/7422/3696/5728/659/2099/4521/3481/4323/2186/2288/55636/1495/26528/6768/7314/10549/2316/5914/409/3326/57448/2309/10959/899/546/5660/30812/9510/8204/5310/9394/26471/3020/2885/8531/23598/867/23411/6599/5747/2034/207/6662/4089/3586/6714/51742/22862/6789/7474/84159/3400/835/1051/3491/3297/55224/5927/6240/10116/1027/595/5155/5594/3021/10049/9757/677/7812/9421/2627/10818…	93
GO:0016236	macroautophagy	67/2431	279/18493	4.98124e-07	1.80356e-05	1.2668e-05	664/3091/2475/11140/64419/8131/7416/5049/23400/2597/5565/27183/149371/27243/26086/4077/23367/54543/79443/57602/23265/7405/28956/26100/51715/128077/83452/826/7415/29979/200576/8678/137886/23411/55004/207/6714/140775/165324/58528/528/51322/10206/9550/4943/51028/83667/79065/9140/7251/27131/5599/55432/5562/143686/5571/64121/153129/10483/81631/523/9706/10558/836/8992/56893/58476	67
GO:0060964	regulation of gene silencing by miRNA	28/2431	80/18493	5.13843e-07	1.84953e-05	1.29908e-05	5530/131405/1956/1994/5460/2099/554313/5430/23369/8366/126374/121504/26523/1981/9611/333932/5431/3020/8364/1660/9612/5433/3021/8356/27161/6774/5468/5434	28
GO:0051348	negative regulation of transferase activity	66/2431	274/18493	5.37851e-07	1.92463e-05	1.35183e-05	5347/1026/3480/8660/3611/122809/2764/2873/5580/3192/9349/1647/1029/3156/23636/9529/65125/9555/6125/4092/51562/5925/867/1849/10527/23411/2931/64853/207/6714/140775/90007/6879/5062/28951/1846/7453/7532/4298/4067/1027/103/7070/7251/8651/5515/9655/5573/1843/10221/7023/1850/11116/7026/1848/7128/29108/151636/11329/161742/93649/836/3984/1050/5468/2167	66
GO:0003205	cardiac chamber development	46/2431	167/18493	5.44846e-07	1.93832e-05	1.36145e-05	3091/7046/6092/659/182/4193/8131/55636/1482/5914/7798/1785/163/9510/7468/4092/6262/2931/84516/4853/4208/6664/7048/4089/6659/7474/3491/4091/5915/10277/7849/23129/2274/9784/7049/9421/2627/10818/10370/7168/57167/93649/7042/4488/57493/2296	46
GO:0045814	negative regulation of gene expression epigenetic	38/2431	127/18493	5.52769e-07	1.95514e-05	1.37326e-05	8493/3066/554313/3065/3070/10933/8085/8366/9555/121504/4152/333932/3720/3005/6839/3020/9643/1786/23347/8364/3146/23411/84444/8467/3159/9869/2146/23378/7320/8520/57169/8932/3021/8356/4204/54107/8726/23512	38
GO:0031571	mitotic G1 DNA damage checkpoint	24/2431	63/18493	5.60337e-07	1.95926e-05	1.37616e-05	4582/1026/472/4193/23019/2033/5111/25904/1647/1874/6154/55159/4849/6659/4194/7027/835/1820/4850/246175/1027/595/11200/6790	24
GO:0044819	mitotic G1/S transition checkpoint	24/2431	63/18493	5.60337e-07	1.95926e-05	1.37616e-05	4582/1026/472/4193/23019/2033/5111/25904/1647/1874/6154/55159/4849/6659/4194/7027/835/1820/4850/246175/1027/595/11200/6790	24
GO:0070301	cellular response to hydrogen peroxide	31/2431	94/18493	5.82638e-07	2.02566e-05	1.42279e-05	664/9314/4193/3066/5580/5111/6188/5536/2309/10131/140885/5660/10105/328/2395/8678/23411/2113/80310/3586/2308/3569/388/3297/2146/5562/9688/23135/7128/57332/3934	31
GO:1903362	regulation of cellular protein catabolic process	60/2431	242/18493	6.21602e-07	2.14892e-05	1.50937e-05	5347/5728/122809/4193/9491/4130/9349/23400/9709/7314/3304/1457/57805/7917/3326/5045/4478/9529/25897/51035/5886/6125/28996/7874/7327/7430/5310/93974/10869/64110/4092/9695/7415/29979/2931/6599/5747/207/160418/3949/51322/28951/255488/1452/26234/7341/55432/9655/5962/5887/2043/10221/25820/6790/7128/127544/29843/9810/56893/1050	60
GO:0048024	regulation of mRNA splicing via spliceosome	32/2431	99/18493	6.41786e-07	2.20623e-05	1.54962e-05	10521/3191/3312/5725/26528/8241/3192/57703/6625/3178/10657/4116/11338/3190/9967/3181/9939/10921/29890/51759/91746/22938/10262/4154/6434/6432/23543/10658/6427/55796/6651/51341	32
GO:0003281	ventricular septum development	26/2431	72/18493	6.49959e-07	2.22184e-05	1.56059e-05	7046/6092/659/4193/8131/1482/7798/1785/163/7468/4092/84516/6664/7048/4089/6659/7474/3491/4091/7849/7049/10818/10370/57167/7042/57493	26
GO:0062012	regulation of small molecule metabolic process	80/2431	355/18493	6.7725e-07	2.30227e-05	1.61708e-05	3091/3667/8660/3481/2475/10447/80025/2023/55578/142/3837/215/5565/2194/2648/11091/79071/10613/10059/37/3156/7376/6472/1213/10105/5901/5261/201163/5223/9611/54541/93974/58526/26119/7415/3638/10776/140710/3146/4953/6901/3692/8720/23411/2931/207/6667/9612/6714/6095/79602/2308/5366/3949/90007/201626/5465/57546/6720/3487/83667/5155/8604/5562/3488/5571/9965/90673/7421/51341/6774/7291/5163/6319/31/4923/…	80
GO:0061458	reproductive system development	93/2431	431/18493	6.8747e-07	2.31144e-05	1.62352e-05	3091/7046/3205/1956/596/598/6092/7422/3696/5728/659/2099/4521/3481/4323/2186/2288/55636/1495/26528/6768/7314/10549/2316/5914/409/3326/57448/2309/10959/899/546/5660/30812/9510/8204/5310/9394/26471/3020/2885/8531/23598/867/23411/6599/5747/2034/207/6662/4089/3586/6714/51742/22862/6789/7474/84159/3400/835/1051/3491/3297/55224/5927/6240/10116/1027/595/5155/5594/3021/10049/9757/677/7812/9421/2627/10818…	93
GO:0050772	positive regulation of axonogenesis	28/2431	81/18493	6.87502e-07	2.31144e-05	1.62352e-05	6092/7422/659/3611/57611/23654/1954/118813/4916/347733/7074/2335/23499/5361/8482/5048/673/6498/4131/51393/4915/9037/9423/23129/51199/2803/9839/3984	28
GO:0009895	negative regulation of catabolic process	68/2431	287/18493	6.9404e-07	2.32067e-05	1.63001e-05	1956/1994/596/1676/114609/7077/2475/10642/9491/8241/3192/4904/4130/9349/23400/2316/1457/57805/84861/7917/6625/3326/23450/5045/3183/9261/23367/9529/57602/167153/11180/51035/9967/6125/28996/10949/7874/7327/1981/2801/54541/4170/92345/10869/8678/8531/2931/6599/5747/1660/207/4088/3586/54855/140775/4194/5465/51322/6093/1982/8604/55432/5562/2043/64802/29843/6774/56893	68
GO:0022613	ribonucleoprotein complex biogenesis	102/2431	485/18493	7.20464e-07	2.39593e-05	1.68287e-05	23405/472/5728/10521/23019/9221/5036/55636/8663/10969/29777/3921/6209/6122/8662/6218/10594/10421/9092/55127/3326/6130/23369/8562/26065/80153/9416/10291/27043/10480/1778/6129/8664/57602/4839/57109/22984/10946/6187/131870/23451/6125/26523/5901/26155/285855/23076/92345/6839/6632/6633/55239/51388/8568/91746/6202/55781/6232/4736/6154/84916/79577/6134/9188/9045/11051/8661/3692/51119/23411/83640/10073/1…	102
GO:1901988	negative regulation of cell cycle phase transition	54/2431	211/18493	7.74977e-07	2.56329e-05	1.80042e-05	9314/5347/4582/1026/8091/596/472/5728/10217/4193/79960/23019/2956/4303/2033/5111/25904/63967/84861/9184/1647/27183/10106/1874/7175/990/9555/56984/8454/6154/79577/5925/55159/4849/6659/4194/57551/7027/835/2146/1820/4850/246175/1027/595/138151/699/677/1843/11200/678/6790/55031/51514	54
GO:0034332	adherens junction organization	40/2431	139/18493	8.66347e-07	2.85009e-05	2.00186e-05	596/7422/5728/1000/4323/5796/5818/1495/87/8394/3728/1500/23499/5817/55920/9748/204851/57662/4092/6281/5747/4088/6714/382/6093/26585/25945/7414/9231/7070/7057/5962/1004/8650/57863/79834/118/9475/999/10979	40
GO:0006977	DNA damage response signal transduction by p53 class mediator resulting in cell cycle arrest	22/2431	56/18493	8.9003e-07	2.91235e-05	2.04559e-05	4582/1026/472/4193/23019/2033/5111/25904/1647/1874/6154/4849/6659/4194/7027/835/1820/4850/246175/1027/11200/6790	22
GO:0046034	ATP metabolic process	61/2431	250/18493	8.99842e-07	2.9288e-05	2.05714e-05	3091/4697/3312/2023/142/506/7167/7386/2597/215/3304/514/4705/10059/3098/283209/5214/226/30968/6391/4706/6472/10105/2584/201163/1537/441531/5223/9611/54541/230/93974/4719/4718/2395/498/7415/4704/9377/10632/4695/477/6901/3692/3939/1352/201626/5465/4731/1355/8604/205/5562/4204/5571/64802/4720/523/51341/6774/515	61
GO:0006342	chromatin silencing	34/2431	110/18493	9.38444e-07	3.03827e-05	2.13404e-05	8493/3066/554313/3065/3070/10933/8085/8366/121504/4152/333932/3005/6839/3020/9643/1786/23347/8364/3146/23411/84444/8467/3159/9869/23378/7320/8520/57169/8932/3021/8356/4204/54107/8726	34
GO:0043405	regulation of MAP kinase activity	76/2431	335/18493	9.72719e-07	3.13267e-05	2.20034e-05	7046/1956/4215/3480/7422/2321/3611/5608/2873/5580/7311/7316/2889/6188/8550/7314/1857/1647/51495/9261/3156/23636/4916/7074/28956/56034/9500/10746/3265/6850/51562/1849/64853/8325/673/6416/80310/5871/4296/8491/6714/7474/57551/2149/1906/389432/28951/2146/1398/1846/6233/4293/5609/4067/7251/5155/7057/5594/5515/5562/1399/2043/1843/10221/10818/1850/3845/1848/2357/11329/161742/958/9839/51196/22943/7335	76
GO:0034728	nucleosome organization	48/2431	181/18493	1.04489e-06	3.34748e-05	2.35122e-05	554313/8970/6597/6944/5757/6046/4171/440689/8366/6830/11198/8349/546/10847/9555/29855/54623/6601/3017/121504/10664/8339/26038/333932/3005/3020/6418/8364/6602/6599/6662/8467/55166/3159/85236/144108/8520/3021/8356/10541/11339/440093/4673/128312/54107/79172/8343/3014	48
GO:0006979	response to oxidative stress	94/2431	441/18493	1.05762e-06	3.36346e-05	2.36244e-05	664/9314/3091/6772/1956/596/4521/4193/3066/10550/4323/5580/5796/84919/1938/5111/6188/142/7001/23400/215/10549/3304/5536/2309/4670/6421/6391/9529/10131/140885/5034/5660/9555/10105/1785/5621/4841/4968/51435/4170/488/328/2395/498/29979/5052/10645/8678/23411/3939/2034/2113/207/80310/6667/3586/6714/2308/1906/3569/388/4277/3297/2146/1398/83667/5599/5594/114757/56616/5562/3840/9688/6648/694/1843/143686/…	94
GO:0043484	regulation of RNA splicing	39/2431	135/18493	1.06087e-06	3.36346e-05	2.36244e-05	10521/3191/3312/5725/26528/8241/3192/5430/57703/6625/10084/3178/10657/3185/4116/11338/3190/9967/3181/23076/9939/10921/29890/51759/91746/22938/6207/10262/4154/22927/6434/6432/23543/10658/6427/282996/55796/6651/51341	39
GO:0051090	regulation of DNA-binding transcription factor activity	89/2431	412/18493	1.1291e-06	3.56131e-05	2.50141e-05	9314/5530/3397/114609/7422/5728/2099/3066/7311/6597/2033/7316/64320/6188/4796/7314/3304/2316/409/3728/1029/5195/4601/6878/28996/11060/5621/7874/5310/6929/6850/4092/51132/8915/54386/114548/5925/23411/1660/207/4088/5292/3586/57506/7474/6446/8887/8323/1906/84159/3569/2146/5927/26585/10206/84868/6233/4921/4591/7341/5594/815/9575/10221/6934/9252/9421/3845/51389/7128/2241/29108/56998/7185/51341/7291/93…	89
GO:1902893	regulation of pri-miRNA transcription by RNA polymerase II	17/2431	37/18493	1.14967e-06	3.60759e-05	2.53392e-05	688/3091/26354/6597/7528/6662/4088/3586/5465/4781/4091/5155/6774/7042/4775/8862/7015	17
GO:0031497	chromatin assembly	45/2431	166/18493	1.16793e-06	3.64619e-05	2.56103e-05	8091/554313/8970/6046/3070/4171/440689/8366/1029/7175/8349/546/9555/29855/54623/3017/121504/10664/26155/8339/333932/3005/3020/6418/23347/8364/3146/6662/8467/55166/3159/85236/144108/8520/3021/8356/10541/11339/440093/4673/128312/54107/79172/8343/3014	45
GO:0072395	signal transduction involved in cell cycle checkpoint	26/2431	74/18493	1.19361e-06	3.70748e-05	2.60408e-05	5347/4582/1026/472/4193/23019/2033/5111/25904/1647/1874/6154/4849/6664/6659/4194/7027/835/988/1820/4850/246175/1027/11200/6790/51514	26
GO:0072431	signal transduction involved in mitotic G1 DNA damage checkpoint	22/2431	57/18493	1.27036e-06	3.90619e-05	2.74365e-05	4582/1026/472/4193/23019/2033/5111/25904/1647/1874/6154/4849/6659/4194/7027/835/1820/4850/246175/1027/11200/6790	22
GO:1902400	intracellular signal transduction involved in G1 DNA damage checkpoint	22/2431	57/18493	1.27036e-06	3.90619e-05	2.74365e-05	4582/1026/472/4193/23019/2033/5111/25904/1647/1874/6154/4849/6659/4194/7027/835/1820/4850/246175/1027/11200/6790	22
GO:0003231	cardiac ventricle development	37/2431	126/18493	1.28567e-06	3.92622e-05	2.75772e-05	3091/7046/6092/659/182/4193/8131/55636/1482/7798/1785/163/7468/4092/6262/2931/84516/4208/6664/7048/4089/6659/7474/3491/4091/10277/7849/7049/9421/10818/10370/7168/57167/93649/7042/57493/2296	37
GO:0033002	muscle cell proliferation	58/2431	236/18493	1.2897e-06	3.92622e-05	2.75772e-05	9314/1026/6772/7046/1956/5728/3611/4193/2475/57447/2547/1482/3156/9510/3720/26119/27086/7520/1786/4208/207/7048/80310/2066/5292/3586/1906/3569/6198/388585/26011/1027/5155/7057/6648/5573/7049/10221/6934/2627/3488/6495/7128/1839/56998/7168/6774/3570/93649/7042/4209/2069/8862/7015/5468/2771/2296/10413	58
GO:0043281	regulation of cysteine-type endopeptidase activity involved in apoptotic process	53/2431	209/18493	1.32174e-06	4.00383e-05	2.81223e-05	6657/9314/4609/7422/1490/4193/10550/6188/9709/1457/2045/409/84334/9141/7531/8915/7415/114548/3146/9812/23411/23204/960/207/4088/6714/5366/331/2149/5062/340485/3491/8795/3297/23786/2152/6197/7057/10049/56616/10541/5896/112399/7023/1654/29108/1718/29843/4671/836/4102/55031/5468	53
GO:0043543	protein acylation	59/2431	242/18493	1.38817e-06	4.18434e-05	2.93902e-05	4582/3066/79960/58489/9329/2033/10933/1743/2648/7917/11091/4191/55625/4836/10847/10664/26155/201163/26038/3054/26471/57634/79969/9643/6418/54386/1387/51562/23411/27097/6877/8295/4089/5105/2308/6659/6879/8202/122830/57551/55733/51126/8520/253832/5562/5187/9575/9252/4204/55124/51200/26036/7291/93649/54107/157570/23741/6591/64769	59
GO:0071156	regulation of cell cycle arrest	33/2431	107/18493	1.42535e-06	4.27535e-05	3.00294e-05	4582/1026/8091/1019/472/4193/23019/4303/2033/5111/25904/9349/1647/1874/3326/6154/4849/6659/4194/7027/835/1820/23378/4850/246175/1027/595/8326/11200/7023/2627/6790/4760	33
GO:0000723	telomere maintenance	43/2431	157/18493	1.48667e-06	4.43753e-05	3.11686e-05	4609/472/554313/26354/6950/2547/3192/5111/142/6117/8550/10694/6119/3326/9401/8366/23049/3183/3178/5892/51750/546/10574/121504/80169/3181/7874/5514/92345/328/7520/54386/8364/5889/6714/5609/10714/5594/1763/23649/5558/5982/7015	43
GO:0006513	protein monoubiquitination	24/2431	66/18493	1.50172e-06	4.46069e-05	3.13312e-05	54880/7314/84861/29128/56970/54623/553115/8454/79577/867/10336/10075/84541/51322/10277/7320/7251/4591/5896/8452/56852/151636/9810/51514	24
GO:0017015	regulation of transforming growth factor beta receptor signaling pathway	35/2431	117/18493	1.53417e-06	4.53508e-05	3.18537e-05	7046/6868/7311/2033/7316/7314/3326/2201/63976/1785/8516/28996/201163/4092/1387/23411/22938/6664/4088/7048/4089/9480/6498/4091/6233/7057/7049/10370/23089/3675/26036/51341/93649/6935/4087	35
GO:2000058	regulation of ubiquitin-dependent protein catabolic process	41/2431	147/18493	1.55394e-06	4.57141e-05	3.21089e-05	5347/5728/122809/4193/4130/9349/9709/3304/1457/57805/7917/3326/9529/25897/51035/5886/6125/28996/7874/64110/4092/7415/29979/2931/6599/5747/207/51322/28951/255488/1452/7341/9655/5887/10221/25820/6790/127544/29843/56893/1050	41
GO:0044773	mitotic DNA damage checkpoint	31/2431	98/18493	1.61095e-06	4.71647e-05	3.31278e-05	4582/1026/8091/472/4193/23019/2956/4303/2033/5111/25904/63967/1647/1874/5514/9656/6154/55159/4849/6659/4194/57551/7027/835/1820/4850/246175/1027/595/11200/6790	31
GO:0071897	DNA biosynthetic process	49/2431	189/18493	1.65338e-06	4.81764e-05	3.38384e-05	9314/4609/472/659/1490/7311/6950/3192/7316/5111/6117/8550/7314/10694/6119/409/3326/5428/3183/3178/10574/80169/3181/7298/3978/92345/7520/7415/54386/23411/6714/7027/26585/6233/5609/10714/5155/5594/9768/1843/23649/5982/27343/55666/54107/51514/7015/5468/4931	49
GO:0051983	regulation of chromosome segregation	32/2431	103/18493	1.71265e-06	4.95932e-05	3.48335e-05	5347/472/9700/3192/1457/84861/9184/23369/7175/1778/6421/546/990/9555/1663/10664/55920/4288/55781/51529/56984/64682/8678/5925/11004/699/8452/1843/56852/8697/29127/25836	32
GO:0046777	protein autophosphorylation	56/2431	227/18493	1.71821e-06	4.95932e-05	3.48335e-05	7525/1956/2261/4215/3480/472/7422/2321/2475/23400/8550/2045/415116/23049/5528/65125/22853/56034/9748/6850/55781/57826/10645/5529/91/5747/207/80310/4296/2066/5292/6714/801/6789/57551/5062/805/26585/4915/65267/2011/4293/4067/7070/5155/4921/815/53904/2043/11200/6790/22848/5911/2241/9706/79834	56
GO:0031507	heterochromatin assembly	9/2431	12/18493	1.7481e-06	5.02189e-05	3.5273e-05	8091/3070/1029/7175/3020/23347/3159/3021/54107	9
GO:0048732	gland development	92/2431	434/18493	1.75649e-06	5.02241e-05	3.52767e-05	6657/3091/7046/3205/1956/596/7422/8660/5728/2099/3481/2288/5111/1723/540/1482/2194/5914/8854/4478/5660/80169/5361/7298/5310/3720/440/6143/10522/6599/9133/2113/6239/673/207/6662/4088/7048/4089/2066/3586/5105/6714/1385/9480/7474/4781/84159/3400/382/1051/7494/7392/5915/2146/6658/7849/5860/9423/23129/10116/1027/595/5594/205/1399/5896/8452/7049/3213/2627/10818/10370/3488/6495/3845/6790/7128/3482/2001/…	92
GO:0034599	cellular response to oxidative stress	67/2431	289/18493	1.89335e-06	5.38855e-05	3.78484e-05	664/9314/3091/1956/596/4193/3066/10550/5580/5796/5111/6188/142/7001/23400/215/3304/5536/2309/6421/9529/10131/140885/5034/5660/10105/1785/4841/4170/488/328/2395/29979/5052/10645/8678/23411/2034/2113/207/80310/3586/6714/2308/3569/388/3297/2146/1398/83667/5599/5594/56616/5562/9688/6648/23135/51389/7128/57332/2241/7168/5163/5829/30001/4314/3934	67
GO:0070997	neuron death	75/2431	335/18493	1.93909e-06	5.4932e-05	3.85834e-05	664/3091/596/598/80315/472/3611/2475/9928/1522/11151/142/997/23400/2597/7314/16/2045/409/3326/5536/2309/9529/163/28996/5621/1981/4841/54434/10525/54541/1822/4170/3265/6418/5925/867/23411/4208/673/207/6416/4296/3586/1385/7474/5465/2149/835/1051/6093/3297/2020/80823/4915/5966/56616/8326/6648/27242/112399/4204/6495/3845/3745/64802/1718/4223/4671/6774/7042/836/22943/7015/4605	75
GO:0034620	cellular response to unfolded protein	38/2431	133/18493	1.95243e-06	5.5055e-05	3.86698e-05	84919/3312/2033/9709/3304/10106/3313/37/3068/84447/4000/1663/55161/10525/440/9797/9695/51182/7415/8720/2931/4189/153222/7494/3297/595/55432/9217/11153/6782/6734/54956/10130/168620/3576/30001/6745/118	38
GO:1903706	regulation of hemopoiesis	89/2431	418/18493	2.1297e-06	5.97502e-05	4.19677e-05	3091/6772/865/3205/4609/3456/4352/182/2475/4323/83881/554313/2778/3065/2033/3304/9092/2648/8085/11091/5914/3313/2101/8451/8366/2309/1021/8943/51441/58508/54623/121504/26523/201163/333932/4343/6929/6850/4092/27086/3020/79577/1387/114548/8364/3146/5925/11051/3692/80349/91/4853/4208/2113/673/7048/1385/5814/8744/1051/940/7494/388585/4850/4067/8651/7057/23543/3021/22806/8356/9655/5896/9757/677/678/102…	89
GO:0010975	regulation of neuron projection development	99/2431	478/18493	2.13847e-06	5.97502e-05	4.19677e-05	9314/5530/3397/6092/7422/5728/659/3611/4193/1000/3066/2475/2288/1522/2033/2889/57611/9693/23654/1857/2045/10059/1627/7431/10084/375/9529/1954/118813/9723/221935/1785/4916/347733/7074/2335/23499/5361/8482/54434/56963/5597/54149/5780/5048/23189/4208/5747/673/207/7533/7474/6498/1808/4131/382/2146/80823/51393/4915/9037/29993/9423/23129/51199/2011/4067/9231/65981/7070/57699/54664/54910/23271/51517/343…	99
GO:0034605	cellular response to heat	32/2431	104/18493	2.165e-06	6.02166e-05	4.22953e-05	1026/472/3066/2475/2288/3312/2033/6117/3304/57805/6119/3326/3313/7175/9261/9529/7531/488/51182/7415/1387/23411/3297/5433/4067/7057/7341/5594/10049/6782/9530/573	32
GO:0006289	nucleotide-excision repair	33/2431	109/18493	2.25414e-06	6.2412e-05	4.38373e-05	10920/2873/10980/7311/2033/7316/5111/142/6117/5430/7314/6119/8451/5886/7874/3978/4968/5431/2965/3150/3146/23411/8533/6233/5433/10714/5887/85015/9716/5982/27343/57461/5434	33
GO:0016072	rRNA metabolic process	58/2431	240/18493	2.29281e-06	6.31968e-05	4.43885e-05	10521/2475/9329/6597/9221/5036/55636/10969/29777/3921/6209/6218/9092/55127/6130/4691/27043/2975/6129/57602/4839/57109/22984/6187/9555/1663/131870/6125/285855/79002/23076/4141/92345/6839/8568/6202/55781/6232/4736/6154/84916/9188/9045/51119/23411/10885/6229/51729/23378/9326/84172/154743/84154/27341/84135/10412/9775/4931	58
GO:2000134	negative regulation of G1/S transition of mitotic cell cycle	34/2431	114/18493	2.32056e-06	6.3675e-05	4.47244e-05	9314/4582/1026/596/472/5728/10217/4193/79960/23019/2033/5111/25904/1647/10106/1874/6154/79577/5925/55159/4849/6659/4194/7027/835/2146/1820/4850/246175/1027/595/138151/11200/6790	34
GO:1903844	regulation of cellular response to transforming growth factor beta stimulus	35/2431	119/18493	2.36524e-06	6.46111e-05	4.53819e-05	7046/6868/7311/2033/7316/7314/3326/2201/63976/1785/8516/28996/201163/4092/1387/23411/22938/6664/4088/7048/4089/9480/6498/4091/6233/7057/7049/10370/23089/3675/26036/51341/93649/6935/4087	35
GO:0009314	response to radiation	93/2431	443/18493	2.38533e-06	6.48703e-05	4.55639e-05	993/3091/1026/8091/1956/4609/596/598/8493/472/4193/2475/50848/5796/2956/2547/2033/5111/142/57805/1647/5428/57646/4836/8243/3156/167153/5500/1785/7528/26155/4968/51435/440/3265/7398/7520/2885/6154/3150/10522/1387/477/55159/10988/867/2140/23411/8533/673/207/8491/3198/1385/801/64859/1408/26224/79073/285/388/3297/10277/121457/10206/6240/51150/7320/5609/595/5599/84328/9768/5562/5896/5187/9575/1843/112…	93
GO:0043044	ATP-dependent chromatin remodeling	27/2431	81/18493	2.42218e-06	6.5581e-05	4.60631e-05	3066/554313/6597/6944/5757/1108/3065/57680/8366/3183/10847/6601/121504/9219/26038/60/8364/57459/6599/8467/56916/55166/144108/8932/11339/54107/79172	27
GO:0072413	signal transduction involved in mitotic cell cycle checkpoint	22/2431	59/18493	2.50724e-06	6.69948e-05	4.70561e-05	4582/1026/472/4193/23019/2033/5111/25904/1647/1874/6154/4849/6659/4194/7027/835/1820/4850/246175/1027/11200/6790	22
GO:1902402	signal transduction involved in mitotic DNA damage checkpoint	22/2431	59/18493	2.50724e-06	6.69948e-05	4.70561e-05	4582/1026/472/4193/23019/2033/5111/25904/1647/1874/6154/4849/6659/4194/7027/835/1820/4850/246175/1027/11200/6790	22
GO:1902403	signal transduction involved in mitotic DNA integrity checkpoint	22/2431	59/18493	2.50724e-06	6.69948e-05	4.70561e-05	4582/1026/472/4193/23019/2033/5111/25904/1647/1874/6154/4849/6659/4194/7027/835/1820/4850/246175/1027/11200/6790	22
GO:1901989	positive regulation of cell cycle phase transition	31/2431	100/18493	2.60399e-06	6.92776e-05	4.86595e-05	993/29766/1019/4193/9700/8317/896/9401/8451/990/894/54623/9510/55920/11065/1981/328/51529/79577/5925/5889/26057/2146/595/5962/8452/4204/1654/8444/51514/7015	31
GO:0034504	protein localization to nucleus	63/2431	269/18493	2.65429e-06	7.02371e-05	4.93335e-05	5347/5530/4193/4321/5580/9221/6950/3192/142/9349/3837/30000/2316/10694/3326/3728/7175/9670/23636/23633/4000/25885/10574/54623/10762/5901/201163/5514/51715/6850/7531/3838/200576/8720/10527/23411/9818/10073/207/6662/4088/6714/57506/83667/7341/5594/3841/9631/10049/51517/3840/9688/84154/6495/151636/55705/26953/51341/6774/84662/7015/999/4931	63
GO:0009167	purine ribonucleoside monophosphate metabolic process	66/2431	286/18493	2.66302e-06	7.02371e-05	4.93335e-05	3091/4697/3615/3312/2023/142/506/7167/7386/2597/215/3304/53343/2618/514/4705/10059/3098/283209/5214/226/30968/6391/4706/6472/3614/10105/2584/201163/1537/441531/5223/9611/54541/230/93974/4719/4718/2395/498/7415/4704/9377/10632/4695/477/6901/3692/3939/1352/201626/5465/4731/1355/11165/8604/205/5562/4204/5571/64802/4720/523/51341/6774/515	66
GO:0031589	cell-substrate adhesion	75/2431	338/18493	2.75121e-06	7.22517e-05	5.07485e-05	3397/596/8324/7422/5054/5728/182/4739/3611/1490/9928/11149/4321/4323/5796/11151/2316/87/8394/3728/1029/1021/3679/54749/81/9723/1785/7074/8516/2335/23499/55920/9748/55698/5310/57662/4289/6281/23189/8515/5747/6239/960/673/4088/3690/6714/9480/340485/285/3491/6093/4091/10562/1398/26585/1295/7414/7070/7057/1399/151887/27329/84034/2241/158326/4585/3675/9358/5829/79834/253725/9341/9475/10979	75
GO:0009142	nucleoside triphosphate biosynthetic process	40/2431	145/18493	2.80001e-06	7.31555e-05	5.13833e-05	3091/3615/2023/142/506/7167/2597/514/3098/283209/5214/226/30968/3614/7298/2584/201163/1537/1503/441531/5223/9611/54541/230/498/7415/10632/6901/4833/3692/3939/51727/5465/8604/205/5562/5571/51341/6774/515	40
GO:0009165	nucleotide biosynthetic process	76/2431	344/18493	2.80953e-06	7.31555e-05	5.13833e-05	3091/115/3615/80025/5635/2023/142/506/7167/1723/2597/2618/2194/514/79071/3098/6576/283209/5214/226/23057/30968/9524/3614/7298/2584/201163/1537/1503/441531/5223/9611/54541/230/1737/79646/2181/498/7415/6241/10632/56894/9061/6901/4833/3692/3939/2617/51727/2182/5465/253558/57546/81602/6240/6470/2977/8604/5594/205/5562/54956/5571/64802/53354/55191/1836/56895/51341/6774/5163/137964/6319/31/8760/515	76
GO:0045773	positive regulation of axon extension	17/2431	39/18493	2.84124e-06	7.32508e-05	5.14503e-05	7422/659/3611/57611/1954/118813/4916/2335/23499/8482/5048/4131/51393/9037/9423/2803/3984	17
GO:0032388	positive regulation of intracellular transport	53/2431	214/18493	2.84127e-06	7.32508e-05	5.14503e-05	4193/5580/56681/2316/3326/10059/9141/3728/10657/7175/5116/54543/1778/4478/375/57602/2010/10055/5621/9919/7430/3265/26119/6850/7531/9695/55781/8723/51496/2931/10075/1660/4088/57506/22916/89781/2040/143425/54471/64328/5594/10541/5962/5562/51128/56947/55754/6934/3745/79752/22871/6857/999	53
GO:1901652	response to peptide	99/2431	481/18493	2.84911e-06	7.32508e-05	5.14503e-05	688/9314/6772/3667/1959/3397/3480/1019/8660/5728/182/3481/1490/30837/4193/2475/4644/115/5580/3191/8891/4303/896/142/9349/1759/7431/2101/2309/8914/3030/990/1663/8471/5621/1537/4141/328/2885/140710/23189/10890/3692/23411/2931/6599/5747/673/207/6667/3586/5105/6714/1385/2308/5465/528/1906/9296/988/6093/6198/5908/7494/6720/3297/1398/9550/5860/7532/83667/4067/8651/815/5573/694/677/7049/2043/3488/143686…	99
[truncated: 1,058 more rows]

## Sheet: S4. TargetScan GO function
ID	Description	GeneRatio	BgRatio	pvalue	p.adjust	qvalue	geneID	Count
[truncated: 801 more rows]

## Sheet: S5. Comment GO terms
ID	Description
[truncated: 230 more rows]

## Sheet: S6. miRDB KEGG pathways
ID	Description	GeneRatio	BgRatio	pvalue	p.adjust	qvalue	geneID	Count
[truncated: 72 more rows]

[truncated: 3 more sheets: S7. miRTarBase KEGG pathways, S8. TargetScan KEGG pathways, S9. Comment KEGG pathways]
